# Supplementary material for: The catalytic asymmetric synthesis of CF3-containing spiro-oxindole–pyrrolidine–pyrazolone compounds through squaramide-catalyzed 1,3-dipolar cycloaddition
Source: Royal Society of Chemistry journal article supplement (doi:10.1039/c9ob00720b), 2019-01-01

## Supporting Information

### The catalytic asymmetric synthesis of Spiro- Oxindole- Pyrrolidine- Pyrazolone compounds

Cui Wang, Dongwa Wen, Hui Chen, Yabo Deng, Xueting Liu, Xin Liu, Li Wang,  
Fengyun Gao, Yifei Guo, Mengmeng Sun, Kairong Wang,\* Wenjin Yan,\*

*The Institute of Pharmacology, Key Laboratory of Preclinical Study for New Drugs  
of Gansu Province, School of Basic, Medical Sciences, Lanzhou University, Lanzhou  
730000, China*

*wangkairong@lzu.edu.cn; yanwj@lzu.edu.cn*

## Table of Contents

|                                                                                       |            |
|---------------------------------------------------------------------------------------|------------|
| <b>1.General Information .....</b>                                                    | <b>S2</b>  |
| <b>2. Representative Procedure.....</b>                                               | <b>S3</b>  |
| <b>3.Analytical Data and HPLC Chromatogram of the Addition<br/>Products.....</b>      | <b>S3</b>  |
| <b>4. X-ray Structure of Compound 3ca.....</b>                                        | <b>S46</b> |
| <b>5. X-ray Structure of Compound 3oa .....</b>                                       | <b>S47</b> |
| <b>6. X-ray Structure of Compound 3ta .....</b>                                       | <b>S48</b> |
| <b>7. Copies of <sup>1</sup>H, <sup>19</sup>F and <sup>13</sup>C NMR Spectra.....</b> | <b>S49</b> |

## 1. General Information

Reactions were monitored by thin layer chromatography (TLC), and compounds were visualized with a UV light at 254 nm. Column chromatography purifications were carried out using silica gel. <sup>1</sup>H, <sup>13</sup>C and <sup>19</sup>F NMR spectra were recorded on a Bruker (300 MHz and 400MHz) spectrometer in CDCl<sub>3</sub> using tetramethylsilane (TMS) as internal standard. Data are presented as follows: chemical shift, integration, multiplicity (br = broad, s = singlet, d = doublet, t = triplet, q = quartet, m = multiplet) and coupling constant in Hertz (Hz). Mass peaks are identified by the corresponding *m/z* values. The ee values determination was carried out using chiral high-performance liquid chromatography (HPLC) with Chiracel IA column, Chiracel IC column and Chiracel OD column. Optical rotations were measured on a digital polarimeter and are reported as follows:  $[\alpha]_D^{25}$  (1 g/100 mL, CHCl<sub>3</sub>).

All solvents were obtained from commercial sources and were purified according to standard procedures. 4-benzylidene-2,5-diphenyl-2,4-dihydro-3H-pyrazol-3-one were synthesized by literature method. <sup>[1]</sup>

### Reference:

[1] Ramajayam, R.; Tan, K.-P.; Liu, H.-G.; Liang, P.-H. *Bio & Med Chem.* **2010**, 2010(18), 7849–7854.

## 2. Representative Procedure

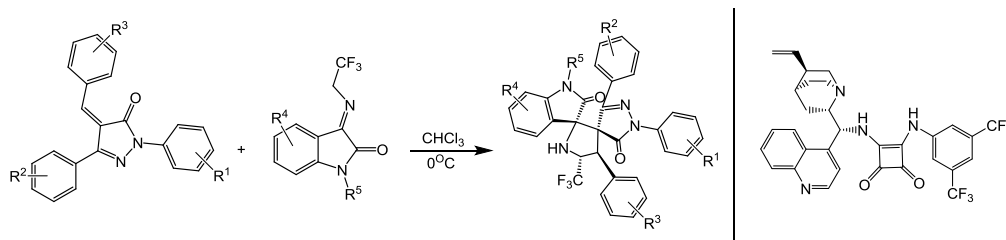

To a solution of cinchonine derived squaramide organocatalyst **C6** (12 mg, 0.02 mmol) and (Z)-1-methyl-3-((2,2,2-trifluoroethyl)imino)indolin-2-one (0.2 mmol) in chloroform (2.0 mL) was added (E)-4-benzylidene-2,5-diphenyl-2,4-dihydro-3H-pyrazol-3-one (0.22 mmol) in chloroform (2.0 mL) at 0°C. The reaction mixture was monitored by TLC inspection. The solvent was evaporated under reduced pressure and the crude residue was purified on silica gel flash column chromatography using ethylacetate/hexanes (1/20) eluent to give the corresponding CF<sub>3</sub>- and Isatin-containing Pyrazolone **3aa-3xa** and **3ab-3am**.

Racemates were prepared following the general procedure by triethylenediamine.

## 3. Analytical Data and HPLC Chromatogram of the Addition Products

(3*S*,3'*S*,4'*R*,5'*R*)-1-methyl-1'',3'',4'-triphenyl-5'-(trifluoromethyl)dispiro[indoline-3,2'-pyrrolidine-3',4''-pyrazole]-2,5''(1''H)-dione (**3aa**)

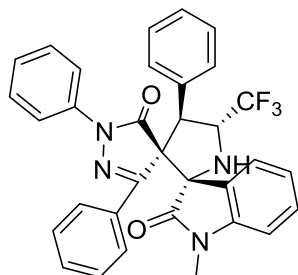

From 48.4 mg (0.20 mmol) 1-methyl-3-((2,2,2-trifluoroethyl)imino)indolin-2-one and 71.28 mg (0.22 mmol, 1.1 equiv) 4-benzylidene-2,5-diphenyl-2,4-dihydro-3H-pyrazol-3-one, 99.0 mg (88% yield) compound **3aa** was obtained as light yellow solid, mp = 98 - 99 °C.  $[\alpha]_D^{20} = +153$  ( $c = 1.0$ , CHCl<sub>3</sub>). Dr (>20:1) determined by <sup>1</sup>H and <sup>19</sup>F NMR analysis. 95% ee was determined by HPLC analysis (Daicel Chiralcel IA column, hexane/2-propanol 9:1, 1.0 mL/min). Retention time:  $t_{\text{major}} = 7.3$  min and  $t_{\text{minor}} = 6.0$  min. <sup>1</sup>H NMR (300 MHz, CDCl<sub>3</sub>) δ 7.64 – 7.41 (m, 10H), 7.31 (dd,  $J = 13.1, 4.9$  Hz, 3H), 7.26 – 7.14 (m, 4H), 6.91 (t,  $J = 7.6$  Hz, 1H), 6.60 (d,  $J = 7.8$  Hz, 1H), 5.80 (d,  $J = 10.1$  Hz, 1H), 5.62 – 5.40 (m, 1H), 3.54 (d,  $J = 9.8$  Hz, 1H), 2.35 (s, 3H). <sup>13</sup>C NMR (100 MHz, CDCl<sub>3</sub>) δ 173.9, 170.7, 154.9, 143.8, 136.7, 132.9, 131.1, 131.0, 130.4, 128.9, 128.9, 128.8, 128.5, 128.1, 126.3, 126.1 (q,  $J_{\text{C-F}} = 278.7$  Hz), 124.4, 123.0, 122.9, 120.2, 108.1, 72.9, 70.5, 61.6 (q,  $J_{\text{C-F}} = 30.7$  Hz), 48.0, 25.0. <sup>19</sup>F NMR (282 MHz, CDCl<sub>3</sub>) δ -72.1; HRMS (ESI)  $m/z$  calcd for C<sub>33</sub>H<sub>25</sub>F<sub>3</sub>N<sub>4</sub>NaO<sub>2</sub> [M+Na]<sup>+</sup>: 589.1822, found 589.1832.

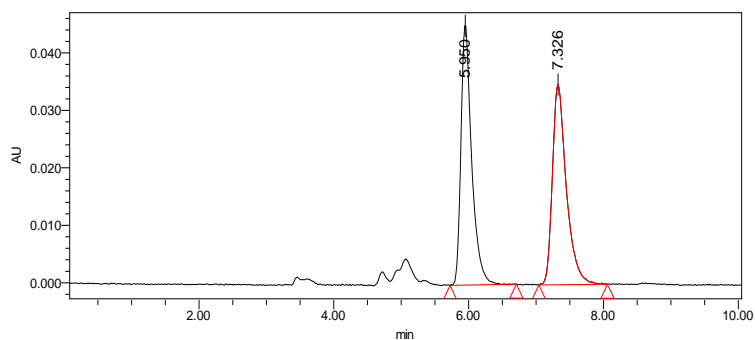

|   | Retention Time | Area   | % Area | Height | Int Type | Peak Type |
|---|----------------|--------|--------|--------|----------|-----------|
| 1 | 5.950          | 501114 | 49.97  | 45462  | bb       | Unknown   |
| 2 | 7.326          | 501701 | 50.03  | 34880  | bb       | Unknown   |

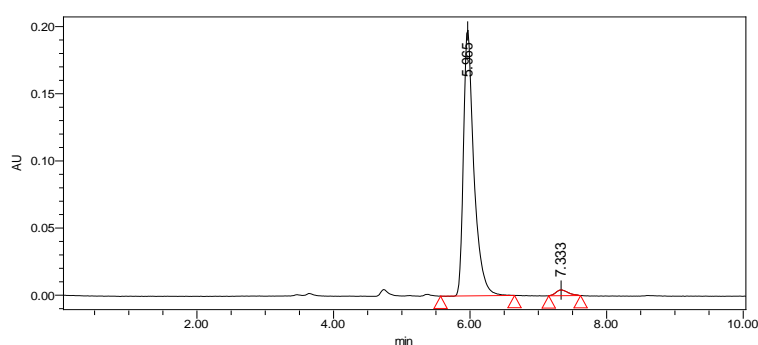

|   | Retention Time | Area    | % Area | Height | Int Type | Peak Type |
|---|----------------|---------|--------|--------|----------|-----------|
| 1 | 5.965          | 2098272 | 97.54  | 197896 | bb       | Unknown   |
| 2 | 7.333          | 52854   | 2.46   | 4236   | bb       | Unknown   |

**(3*S*,3'*S*,4'*R*,5'*R*)-1'',3'',4'-triphenyl-5'-(trifluoromethyl)dispiro[indoline-3,2'-pyrrolidine-3',4'-pyrazole]-2,5''(1''*H*)-dione (**3ab**)**

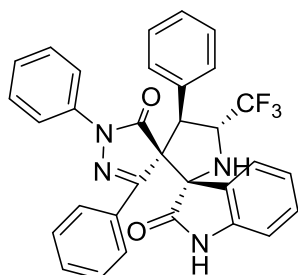

From 45.6 mg (0.20 mmol) 3-((2,2,2-trifluoroethyl)imino)indolin-2-one and 71.28 mg (0.22 mmol, 1.1 equiv) 4-benzylidene-2,5-diphenyl-2,4-dihydro-3H-pyrazol-3-one, 93.5 mg (77% yield) compound **3ab** was obtained as light yellow solid. mp = 139 - 140 °C.  $[\alpha]_D^{20} = +85$  ( $c = 1.0$ ,  $\text{CHCl}_3$ ). Dr (>20:1) determined by  $^1\text{H}$  and  $^{19}\text{F}$  NMR analysis. 80% ee was determined by HPLC analysis (Daicel Chiralcel OD column, hexane/2-propanol 20:1, 1.0 mL/min). Retention time:  $t_{\text{major}} = 10.9$  min and  $t_{\text{minor}} = 9.0$  min.  $^1\text{H}$  NMR (300 MHz,  $\text{CDCl}_3$ )  $\delta$  7.67 – 7.47 (m, 8H), 7.43 – 7.15 (m, 12H), 6.89 (td,  $J = 7.7, 0.8$  Hz, 1H), 6.65 (d,  $J = 7.7$  Hz, 1H), 5.70 (dd,  $J = 15.3, 10.1$  Hz, 1H), 5.46 (td,  $J = 9.8, 4.9$  Hz, 1H), 3.47 (d,  $J = 9.8$  Hz, 1H).  $^{13}\text{C}$  NMR (100 MHz,  $\text{CDCl}_3$ )

$\delta$  176.1, 170.7, 155.0, 141.3, 136.7, 132.9, 131.1, 131.0, 130.5, 128.9, 128.9, 128.6, 128.5, 128.1, 126.3, 126.0 (q,  $J_{C-F} = 278.6$  Hz), 125.1, 123.6, 123.0, 120.2, 110.0, 72.7, 70.6, 61.6 (q,  $J_{C-F} = 30.3$  Hz), 48.1.  $^{19}\text{F}$  NMR (282MHz,  $\text{CDCl}_3$ )  $\delta$  -72.0; HRMS (ESI)  $m/z$  calcd for  $\text{C}_{32}\text{H}_{23}\text{F}_3\text{N}_4\text{NaO}_2$   $[\text{M}+\text{Na}]^+$ : 575.1665, found 575.1665.

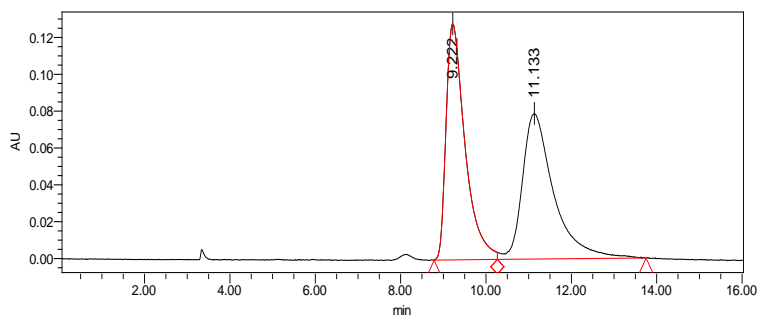

|   | Retention Time | Area    | % Area | Height | Int Type | Peak Type |
|---|----------------|---------|--------|--------|----------|-----------|
| 1 | 9.222          | 3955584 | 49.53  | 128199 | bv       | Unknown   |
| 2 | 11.133         | 4031039 | 50.47  | 78962  | vb       | Unknown   |

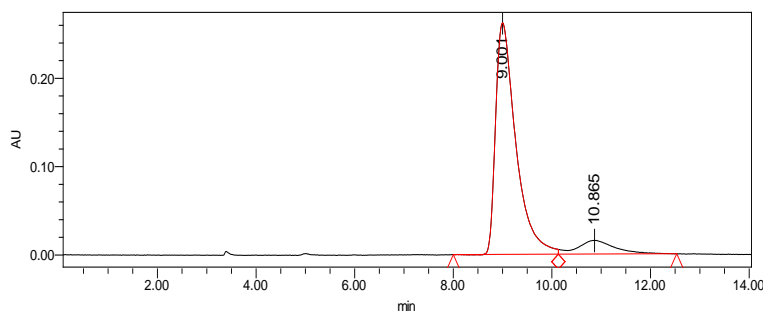

|   | Retention Time | Area    | % Area | Height | Int Type | Peak Type |
|---|----------------|---------|--------|--------|----------|-----------|
| 1 | 9.001          | 7474264 | 90.18  | 262339 | bv       | Unknown   |
| 2 | 10.865         | 814051  | 9.82   | 15424  | vb       | Unknown   |

**(3*S*,3'*S*,4'*R*,5'*R*)-1-acetyl-1'',3'',4'-triphenyl-5'-(trifluoromethyl)dispiro[indoline-3,2'-pyrrolidine-3',4''-pyrazole]-2,5''(1''H)-dione (3ac)**

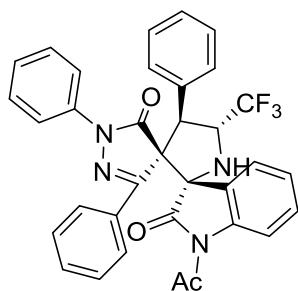

From 54 mg (0.20 mmol) 1-acetyl-3-((2,2,2-trifluoroethyl)imino)indolin-2-one and 71.28 mg (0.22 mmol, 1.1 equiv) 4-benzylidene-2,5-diphenyl-2,4-dihydro-3H-pyrazol-3-one, 103.4 mg (87 % yield) compound **3ac** was obtained as red solid. mp =

110 - 111 °C.  $[\alpha]_D^{20} = + 182$  ( $c = 1.0$ ,  $\text{CHCl}_3$ ). Dr (>20:1) determined by  $^1\text{H}$  and  $^{19}\text{F}$  NMR analysis. 81% ee was determined by HPLC analysis (Daicel Chiralcel IC column, hexane/2-propanol 20:1, 1.0 mL/min). Retention time:  $t_{\text{major}} = 8.1$  min and  $t_{\text{minor}} = 6.8$  min.  $^1\text{H}$  NMR (300 MHz,  $\text{CDCl}_3$ )  $\delta$  8.14 (d,  $J = 8.1$  Hz, 1H), 7.67 – 7.58 (m, 5H), 7.48 (ddd,  $J = 9.1, 4.7, 1.4$  Hz, 5H), 7.37 – 7.24 (m, 6H), 7.20 (dd,  $J = 11.6, 4.2$  Hz, 1H), 7.10 (td,  $J = 7.7, 0.8$  Hz, 1H), 5.56 (ddd,  $J = 17.4, 17.0, 6.3$  Hz, 2H), 3.44 (d,  $J = 9.1$  Hz, 1H), 1.85 (s, 3H).  $^{13}\text{C}$  NMR (100 MHz,  $\text{CDCl}_3$ )  $\delta$  175.2, 170.4, 170.0, 154.2, 140.2, 136.5, 132.4, 131.6, 131.2, 130.9, 129.1, 128.9, 128.7, 128.7, 128.6, 126.5, 126.0 (q,  $J_{\text{C-F}} = 278.3$  Hz), 125.6, 124.2, 122.3, 120.1, 116.7, 73.6, 70.9, 61.8 (q,  $J_{\text{C-F}} = 30.7$  Hz), 47.9, 25.7.  $^{19}\text{F}$  NMR (282 MHz,  $\text{CDCl}_3$ )  $\delta$  -72.4; HRMS (ESI)  $m/z$  calcd for  $\text{C}_{34}\text{H}_{25}\text{F}_3\text{N}_4\text{NaO}_3$   $[\text{M}+\text{Na}]^+$ : 617.1771, found 617.1775.

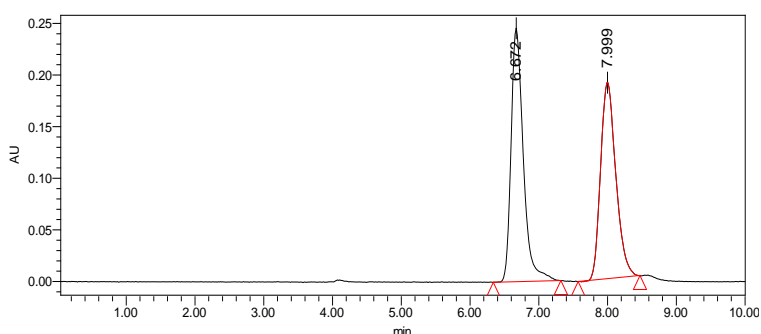

|   | Retention Time | Area    | % Area | Height | Int Type | Peak Type |
|---|----------------|---------|--------|--------|----------|-----------|
| 1 | 6.672          | 3036874 | 50.90  | 245310 | bb       | Unknown   |
| 2 | 7.999          | 2928898 | 49.10  | 190516 | bb       | Unknown   |

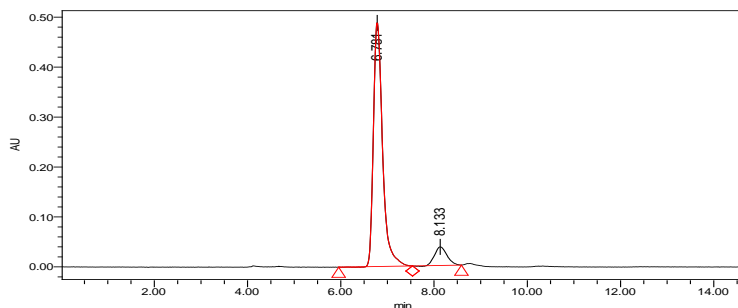

|   | Retention Time | Area    | % Area | Height | Int Type | Peak Type |
|---|----------------|---------|--------|--------|----------|-----------|
| 1 | 6.781          | 6687139 | 90.43  | 489262 | bv       | Unknown   |
| 2 | 8.133          | 707449  | 9.57   | 37307  | vb       | Unknown   |

**(3*S*,3'*S*,4'*R*,5'*R*)-1-benzyl-1'',3'',4'-triphenyl-5'-(trifluoromethyl)dispiro[indoline-3,2'-pyrrolidine-3',4''-pyrazole]-2,5''(1''H)-dione (3ad)**

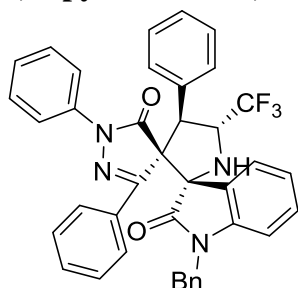

From 63.6 mg (0.20 mmol) 1-benzyl-3-((2,2,2-trifluoroethyl)imino)indolin-2-one and 71.28 mg (0.22 mmol, 1.1 equiv) 4-benzylidene-2,5-diphenyl-2,4-dihydro-3H-pyrazol-3-one, 101.4 mg (79 % yield) compound **3ad** was obtained as light yellow solid, mp = 120 - 121 °C.  $[\alpha]_D^{20} = +99$  ( $c = 1.0$ ,  $\text{CHCl}_3$ ). Dr (>20:1) determined by  $^1\text{H}$  and  $^{19}\text{F}$  NMR analysis.  $^1\text{H}$  NMR (300 MHz,  $\text{CDCl}_3$ )  $\delta$  7.74 – 7.61 (m, 2H), 7.42 (ddd,  $J = 13.2, 9.3, 5.0$  Hz, 8H), 7.24 – 6.93 (m, 11H), 6.85 – 6.68 (m, 3H), 6.36 (d,  $J = 7.8$  Hz, 1H), 5.81 (d,  $J = 10.0$  Hz, 1H), 5.45 (dd,  $J = 15.6, 7.9$  Hz, 1H), 4.01 (d,  $J = 15.8$  Hz, 1H), 3.75 (d,  $J = 15.8$  Hz, 1H), 3.47 (d,  $J = 9.4$  Hz, 1H).  $^{13}\text{C}$  NMR (75 MHz,  $\text{CDCl}_3$ )  $\delta$  173.1, 169.6, 153.4, 142.0, 135.5, 133.7, 131.7, 130.0, 129.8, 129.5, 127.8, 127.8, 127.8, 127.6, 127.4, 127.3 (q,  $J_{\text{C-F}} = 277.8$  Hz), 127.1, 126.5, 126.2, 125.2, 123.5, 122.0, 121.9, 119.0, 108.4, 72.0, 69.5, 60.4 (q,  $J_{\text{C-F}} = 30.7$  Hz), 47.3, 42.2, -0.00.  $^{19}\text{F}$  NMR (282 MHz,  $\text{CDCl}_3$ )  $\delta$  -71.9; HRMS (ESI)  $m/z$  calcd for  $\text{C}_{39}\text{H}_{29}\text{F}_3\text{N}_4\text{NaO}_2$   $[\text{M}+\text{Na}]^+$ : 665.2135, found 665.2126.

**tert-butyl(3*S*,3'*S*,4'*R*,5'*R*)-2,5''-dioxo-1'',3'',4'-triphenyl-5'-(trifluoromethyl)-1'',5''-dihydrodispiro[indoline-3,2'-pyrrolidine-3',4''-pyrazole]-1-carboxylate (3ae)**

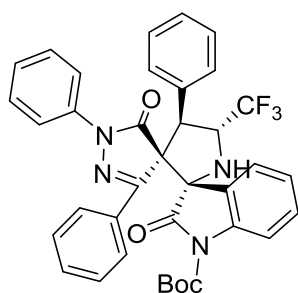

From 65.6 mg (0.20 mmol) tert-butyl 2-oxo-3-((2,2,2-trifluoroethyl)imino)indoline-1-carboxylate and 71.28 mg (0.22 mmol, 1.1 equiv) 4-benzylidene-2,5-diphenyl-2,4-dihydro-3H-pyrazol-3-one, 78.2 mg (66% yield) compound **3ae** was obtained as light yellow solid. mp = 119 - 120°C.  $[\alpha]_D^{20} = +172$  ( $c = 1.0$ ,  $\text{CHCl}_3$ ). Dr (>20:1) determined by  $^1\text{H}$  and  $^{19}\text{F}$  NMR analysis. 42% ee was determined by HPLC analysis (Daicel Chiralcel OD column, hexane/2-propanol 20:1, 1.0 mL/min). Retention time:  $t_{\text{major}} = 9.1$  min and  $t_{\text{minor}} = 5.1$  min.  $^1\text{H}$  NMR (300 MHz,  $\text{CDCl}_3$ )  $\delta$  7.80 (d,  $J = 8.1$  Hz, 1H), 7.62 (ddd,  $J = 11.9, 7.8, 3.4$  Hz, 5H), 7.52 – 7.43 (m, 5H), 7.35 – 7.14 (m, 8H), 7.09 – 6.94 (m, 1H), 5.71 (d,  $J = 10.1$  Hz, 1H), 5.63 – 5.46 (m, 1H), 3.42 (d,  $J = 9.4$  Hz, 1H), 1.41 (s, 9H).  $^{13}\text{C}$  NMR (100 MHz,  $\text{CDCl}_3$ )  $\delta$  172.4, 170.2, 154.4, 148.3,

140.2, 136.6, 132.6, 131.3, 130.9, 130.8, 128.9, 128.9, 128.9, 128.6, 128.6, 128.5, 126.3, 126.0 (q,  $J_{C-F} = 278.7$  Hz), 124.7, 124.3, 122.1, 120.2, 115.2, 84.2, 77.3, 73.6, 70.6, 61.5 (q,  $J_{C-F} = 30.7$  Hz), 48.0, 27.9.  $^{19}\text{F}$  NMR (282MHz,  $\text{CDCl}_3$ )  $\delta$ -72.1; HRMS (ESI)  $m/z$  calcd for  $\text{C}_{37}\text{H}_{31}\text{F}_3\text{N}_4\text{NaO}_4$   $[\text{M}+\text{Na}]^+$ : 675.2190, found 675.2196.

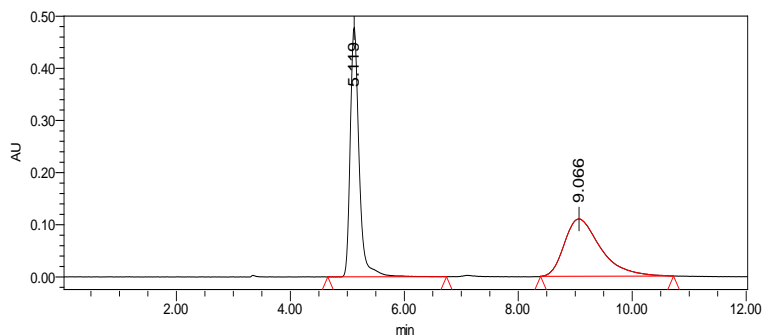

|   | Retention Time | Area    | % Area | Height | Int Type | Peak Type |
|---|----------------|---------|--------|--------|----------|-----------|
| 1 | 5.119          | 5178143 | 51.67  | 479484 | bb       | Unknown   |
| 2 | 9.066          | 4844002 | 48.33  | 109958 | bb       | Unknown   |

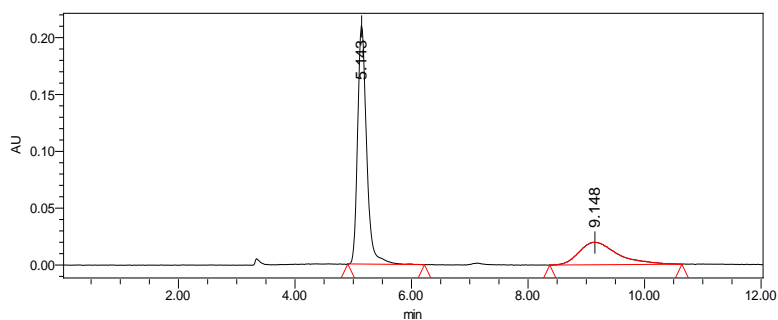

|   | Retention Time | Area    | % Area | Height | Int Type | Peak Type |
|---|----------------|---------|--------|--------|----------|-----------|
| 1 | 5.143          | 2252032 | 71.23  | 210036 | bb       | Unknown   |
| 2 | 9.148          | 909390  | 28.77  | 19652  | bb       | Unknown   |

**(3*S*,3'*S*,4'*R*,5'*R*)-5-fluoro-1-methyl-1'',3'',4'-triphenyl-5'-(trifluoromethyl)dispiro [indoline-3,2'-pyrrolidine-3',4''-pyrazole]-2,5''(1''H)-dione (3af)**

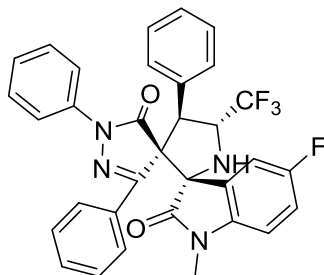

From 52 mg (0.20mmol) 5-fluoro-1-methyl-3-((2,2,2-trifluoroethyl)imino)indolin-2-one and 71.28 mg (0.22 mmol, 1.1 equiv) 4-benzylidene-2,5-diphenyl-2,4-dihydro-3H-pyrazol-3-one, 94.6 mg (81% yield) compound **3af** was obtained as light yellow



solid, mp = 105 - 106 °C.  $[\alpha]_D^{20} = + 82$  ( $c = 1.0$ ,  $\text{CHCl}_3$ ). Dr (>20:1) determined by  $^1\text{H}$  and  $^{19}\text{F}$  NMR analysis. 87% ee was determined by HPLC analysis (Daicel Chiralcel IA column, hexane/2-propanol 9:1, 1.0 mL/min). Retention time:  $t_{\text{major}} = 8.6$  min and  $t_{\text{minor}} = 6.7$  min.  $^1\text{H}$  NMR (300 MHz,  $\text{CDCl}_3$ )  $\delta$  7.52 – 7.41 (m, 6H), 7.42 – 7.31 (m, 3H), 7.31 – 7.23 (m, 3H), 7.23 – 7.10 (m, 5H), 6.90 (td,  $J = 8.7, 2.6$  Hz, 1H), 6.46 (dd,  $J = 8.6, 4.1$  Hz, 1H), 5.69 (d,  $J = 10.1$  Hz, 1H), 5.39 (ddd,  $J = 17.2, 7.4, 2.5$  Hz, 1H), 3.40 (d,  $J = 9.7$  Hz, 1H), 2.28 (s, 3H).  $^{13}\text{C}$  NMR (100 MHz,  $\text{CDCl}_3$ )  $\delta$  172.7, 169.4, 159.2, 156.7, 153.8, 138.8, 138.8, 135.5, 131.5, 129.8, 129.4, 127.9, 127.9, 127.7, 127.6, 127.4, 127.1, 125.4, 124.9 (q,  $J_{\text{C-F}} = 278.3$  Hz), 119.1, 116.3 (d,  $J_{\text{C-F}} = 18$  Hz), 112.1 (d,  $J_{\text{C-F}} = 19.5$  Hz), 107.7, 107.6, 71.7, 69.3, 69.3, 60.5 (q,  $J_{\text{C-F}} = 30.7$  Hz), 47.0, 24.1.  $^{19}\text{F}$  NMR (282 MHz,  $\text{CDCl}_3$ )  $\delta$  -72.2, -118.9; HRMS (ESI)  $m/z$  calcd for  $\text{C}_{33}\text{H}_{24}\text{F}_4\text{N}_4\text{NaO}_2$   $[\text{M}+\text{Na}]^+$ : 607.1728, found 607.1735.

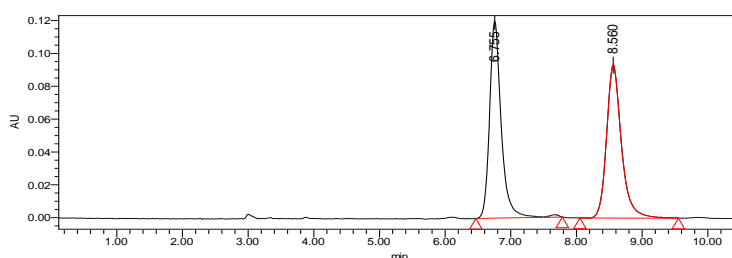

|   | Retention Time | Area    | % Area | Height | Int Type | Peak Type |
|---|----------------|---------|--------|--------|----------|-----------|
| 1 | 6.755          | 1481361 | 50.21  | 120333 | bb       | Unknown   |
| 2 | 8.560          | 1468974 | 49.79  | 93366  | bb       | Unknown   |

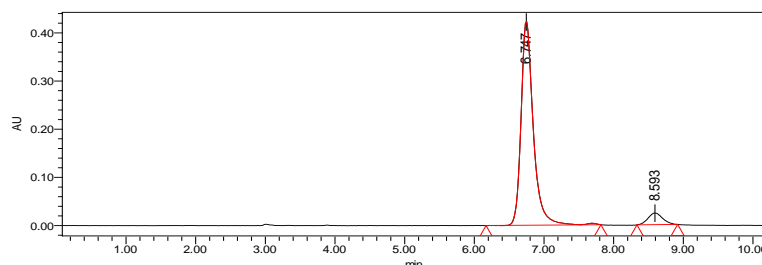

|   | Retention Time | Area    | % Area | Height | Int Type | Peak Type |
|---|----------------|---------|--------|--------|----------|-----------|
| 1 | 6.747          | 5174202 | 93.61  | 423338 | bb       | Unknown   |
| 2 | 8.593          | 353157  | 6.39   | 24233  | bb       | Unknown   |

**(3S,3'S,4'R,5'R)-1,5-dimethyl-1'',3'',4'-triphenyl-5'-(trifluoromethyl)dispiro[indoline-3,2'-pyrrolidine-3',4''-pyrazole]-2,5''(1''H)-dione (3ag)**

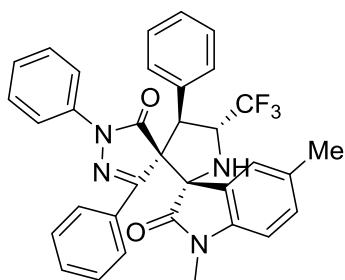

From 51.2 mg (0.20 mmol) 1,5-dimethyl-3-((2,2,2-trifluoroethyl)imino)indolin-2-one and 71.28 mg (0.22 mmol, 1.1 equiv) 4-benzylidene-2,5-diphenyl-2,4-dihydro-3H-pyrazol-3-one, 98.8 mg (85% yield) compound **3ag** was obtained as light yellow solid, mp = 158 - 159 °C.  $[\alpha]_D^{20} = +99$  ( $c = 1.0$ ,  $\text{CHCl}_3$ ). Dr (>20:1) determined by  $^1\text{H}$  and  $^{19}\text{F}$  NMR analysis. 95% ee was determined by HPLC analysis (Daicel Chiralcel IA column, hexane/2-propanol 9:1, 1.0 mL/min). Retention time:  $t_{\text{major}} = 13.3$  min and  $t_{\text{minor}} = 9.0$  min.  $^1\text{H}$  NMR (300 MHz,  $\text{CDCl}_3$ )  $\delta$  7.64 – 7.49 (m, 6H), 7.47 – 7.40 (m, 3H), 7.36 – 7.15 (m, 7H), 7.02 (d,  $J = 7.9$  Hz, 1H), 6.48 (d,  $J = 7.9$  Hz, 1H), 5.81 (d,  $J = 10.1$  Hz, 1H), 5.60 – 5.42 (m, 1H), 3.51 (d,  $J = 9.8$  Hz, 1H), 2.33 (s, 3H), 2.11 (s, 3H).  $^{13}\text{C}$  NMR (100 MHz,  $\text{CDCl}_3$ )  $\delta$  172.7, 169.8, 153.8, 140.3, 135.7, 132.0, 131.4, 130.2, 130.0, 129.3, 127.9, 127.8, 127.6, 127.5, 127.4, 127.0, 125.2, 125.0 (q,  $J_{\text{C-F}} = 278.7$  Hz), 124.1, 121.8, 119.0, 106.8, 71.9, 69.8, 60.8 (q,  $J_{\text{C-F}} = 30.3$  Hz), 46.7, 24.0, 19.8.  $^{19}\text{F}$  NMR (282 MHz,  $\text{CDCl}_3$ )  $\delta$  -72.0; HRMS (ESI)  $m/z$  calcd for  $\text{C}_{34}\text{H}_{28}\text{F}_3\text{N}_4\text{O}_2$   $[\text{M}+\text{H}]^+$ : 581.2159, found 581.2159.

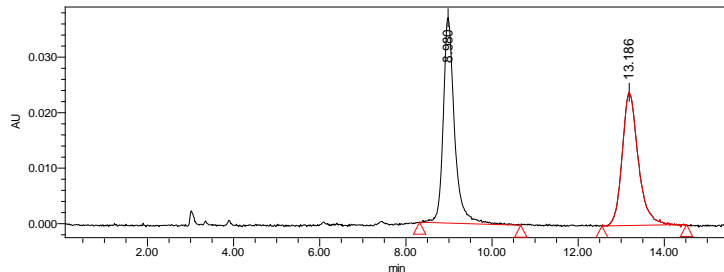

|   | Retention Time | Area   | % Area | Height | Int Type | Peak Type |
|---|----------------|--------|--------|--------|----------|-----------|
| 1 | 8.980          | 675856 | 52.06  | 36988  | bb       | Unknown   |
| 2 | 13.186         | 622381 | 47.94  | 23968  | bb       | Unknown   |

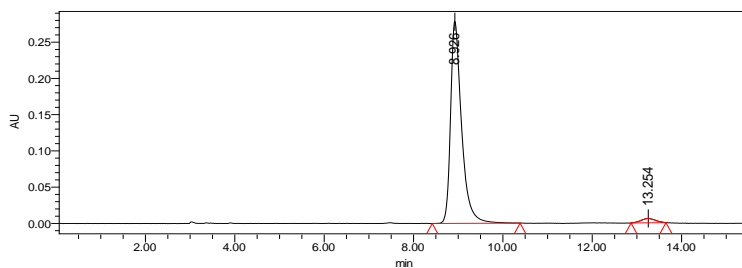

|   | Retention Time | Area    | % Area | Height | Int Type | Peak Type |
|---|----------------|---------|--------|--------|----------|-----------|
| 1 | 8.926          | 4756063 | 97.25  | 279156 | bb       | Unknown   |

|   |        |        |      |      |    |         |
|---|--------|--------|------|------|----|---------|
| 2 | 13.254 | 134715 | 2.75 | 6105 | bb | Unknown |
|---|--------|--------|------|------|----|---------|

**(3*S*,3'*S*,4'*R*,5'*R*)-1-benzyl-1'',3'',4'-triphenyl-5'-(trifluoromethyl)dispiro[indoline-3,2'-pyrrolidine-3',4''-pyrazole]-2,5''(1''H)-dione (3ah)**

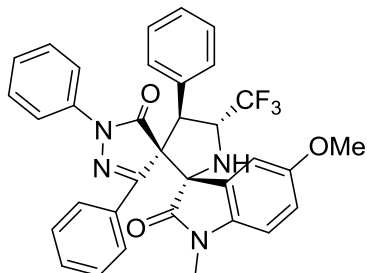

From 54.4 mg (0.20 mmol) 5-methoxy-1-methyl-3-((2,2,2-trifluoroethyl)imino)indolin-2-one and 71.28 mg (0.22 mmol, 1.1 equiv) 4-benzylidene-2,5-diphenyl-2,4-dihydro-3H-pyrazol-3-one, 103.9 mg (87% yield) compound **3ah** was obtained as light yellow solid, mp = 126 - 127 °C.  $[\alpha]_D^{20} = +71$  ( $c = 1.0$ ,  $\text{CHCl}_3$ ). Dr (>20:1) determined by  $^1\text{H}$  and  $^{19}\text{F}$  NMR analysis. 96% ee was determined by HPLC analysis (Daicel Chiralcel IA column, hexane/2-propanol 9:1, 1.0 mL/min). Retention time:  $t_{\text{major}} = 8.6$  min and  $t_{\text{minor}} = 6.0$  min.  $^1\text{H}$  NMR (300 MHz,  $\text{CDCl}_3$ )  $\delta$  7.49 (dt,  $J = 7.4, 3.0$  Hz, 4H), 7.43 – 7.32 (m, 4H), 7.28 – 7.06 (m, 7H), 6.82 (t,  $J = 7.4$  Hz, 1H), 6.72 – 6.63 (m, 1H), 6.52 (d,  $J = 7.8$  Hz, 1H), 5.69 (d,  $J = 10.1$  Hz, 1H), 5.38 (td,  $J = 9.8, 4.9$  Hz, 1H), 3.55 (s, 3H), 3.45 (d,  $J = 9.8$  Hz, 1H), 2.27 (s, 3H).  $^{13}\text{C}$  NMR (100 MHz,  $\text{CDCl}_3$ )  $\delta$  173.6, 170.7, 156.0, 155.0, 137.1, 136.7, 132.9, 131.0, 130.4, 130.2, 129.0, 128.8, 128.7, 128.5, 128.0, 126.2, 126.1 (q,  $J_{\text{C-F}} = 278.7$  Hz), 123.9, 119.9, 116.4, 111.1, 108.7, 73.0, 70.8, 61.7 (q,  $J_{\text{C-F}} = 30.3$  Hz), 55.7, 47.9, 25.1.  $^{19}\text{F}$  NMR (282 MHz,  $\text{CDCl}_3$ )  $\delta$  -72.0; HRMS (ESI)  $m/z$  calcd for  $\text{C}_{34}\text{H}_{27}\text{F}_3\text{N}_4\text{NaO}_2$   $[\text{M}+\text{Na}]^+$ : 619.1927, found 619.1931.

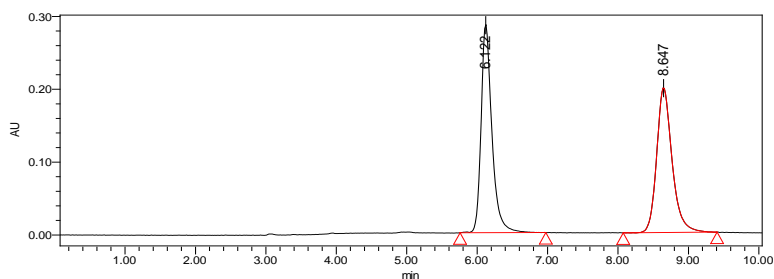

|   | Retention Time | Area    | % Area | Height | Int Type | Peak Type |
|---|----------------|---------|--------|--------|----------|-----------|
| 1 | 6.122          | 3056342 | 50.28  | 285414 | bb       | Unknown   |
| 2 | 8.647          | 3022094 | 49.72  | 198897 | bb       | Unknown   |

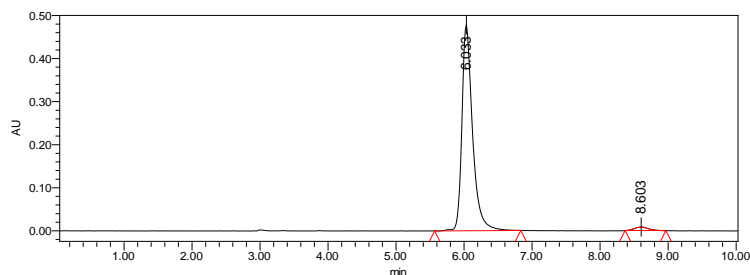

|   | Retention Time | Area    | % Area | Height | Int Type | Peak Type |
|---|----------------|---------|--------|--------|----------|-----------|
| 1 | 6.033          | 5194723 | 97.83  | 478192 | bb       | Unknown   |
| 2 | 8.603          | 115172  | 2.17   | 8186   | bb       | Unknown   |

**(3*S*,3'*S*,4'*R*,5'*R*)-6-chloro-1-methyl-1'',3'',4'-triphenyl-5'-(trifluoromethyl)dispiro [indoline-3,2'-pyrrolidine-3',4''-pyrazole]-2,5''(1''H)-dione (**3ai**)**

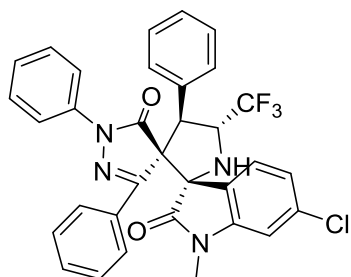

From 55.4 mg (0.20 mmol) 6-chloro-1-methyl-3-((2,2,2-trifluoroethyl)imino)indolin-2-one and 71.28 mg (0.22 mmol, 1.1 equiv) 4-benzylidene-2,5-diphenyl-2,4-dihydro-3H-pyrazol-3-one, 103.4 mg (86% yield) compound **3ai** was obtained as light yellow solid, mp = 123 - 124 °C.  $[\alpha]_D^{20} = +103$  ( $c = 1.0$ ,  $\text{CHCl}_3$ ). Dr (>20:1) determined by  $^1\text{H}$  and  $^{19}\text{F}$  NMR analysis. 93% ee was determined by HPLC analysis (Daicel Chiralcel IA column, hexane/2-propanol 9:1, 1.0 mL/min). Retention time:  $t_{\text{major}} = 8.7$  min and  $t_{\text{minor}} = 6.5$  min.  $^1\text{H}$  NMR (300 MHz,  $\text{CDCl}_3$ )  $\delta$  7.64 – 7.50 (m, 6H), 7.50 – 7.31 (m, 6H), 7.30 – 7.16 (m, 4H), 6.89 (d,  $J = 8.1$  Hz, 1H), 6.61 (s, 1H), 5.75 (d,  $J = 9.9$  Hz, 1H), 5.47 (dt,  $J = 15.6, 7.9$  Hz, 1H), 3.48 (d,  $J = 9.5$  Hz, 1H), 2.34 (s, 3H).  $^{13}\text{C}$  NMR (100 MHz,  $\text{CDCl}_3$ )  $\delta$  173.9, 170.6, 154.8, 145.1, 137.0, 136.6, 132.6, 130.8, 130.5, 129.0, 128.9, 128.8, 128.6, 128.4, 128.1, 126.4, 125.9 (q,  $J_{\text{C-F}} = 278.7$  Hz), 125.6, 122.7, 121.5, 120.0, 108.9, 72.8, 70.0, 61.4 (q,  $J_{\text{C-F}} = 30.7$  Hz), 48.0, 25.2, 0.01.  $^{19}\text{F}$  NMR (282 MHz,  $\text{CDCl}_3$ )  $\delta$  -72.2; HRMS (ESI)  $m/z$  calcd for  $\text{C}_{33}\text{H}_{24}\text{ClF}_3\text{N}_4$   $\text{NaO}_2$   $[\text{M}+\text{Na}]^+$ : 623.1432, found 623.1436.

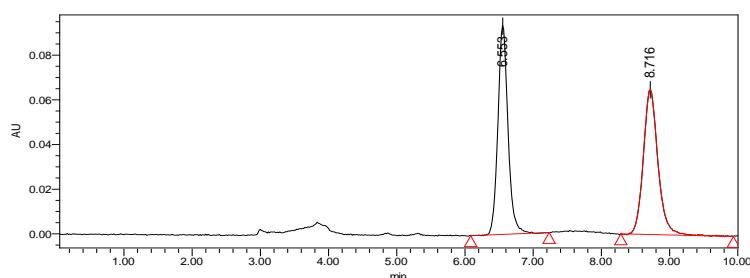

|   | Retention Time | Area   | % Area | Height | Int Type | Peak Type |
|---|----------------|--------|--------|--------|----------|-----------|
| 1 | 6.553          | 965608 | 49.87  | 93634  | bb       | Unknown   |
| 2 | 8.716          | 970508 | 50.13  | 65021  | bb       | Unknown   |

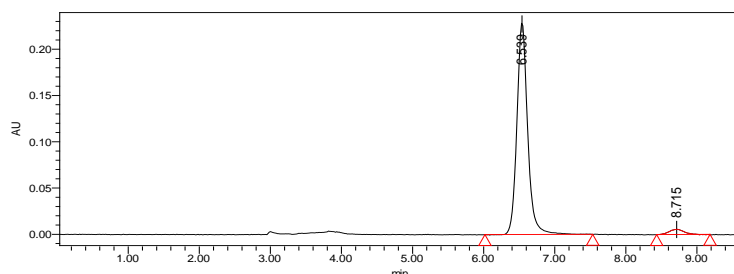

|   | Retention Time | Area    | % Area | Height | Int Type | Peak Type |
|---|----------------|---------|--------|--------|----------|-----------|
| 1 | 6.539          | 2418892 | 96.70  | 228693 | bb       | Unknown   |
| 2 | 8.715          | 82668   | 3.30   | 5560   | bb       | Unknown   |

**(3*S*,3'*S*,4'*R*,5'*R*)-6-bromo-1-methyl-1'',3'',4'-triphenyl-5'-(trifluoromethyl)dispiro[indoline-3,2'-pyrrolidine-3',4''-pyrazole]-2,5''(1''H)-dione (3aj)**

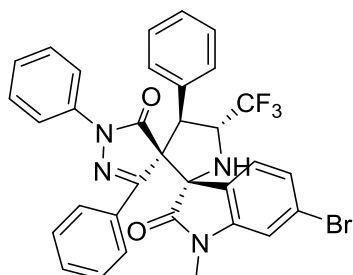

From 64.2 mg (0.20 mmol) 6-bromo-1-methyl-3-((2,2,2-trifluoroethyl)imino)indolin-2-one and 71.28 mg (0.22 mmol, 1.1 equiv) 4-benzylidene-2,5-diphenyl-2,4-dihydro-3H-pyrazol-3-one, 105.8 mg (82% yield) compound **3aj** was obtained as light yellow solid, mp = 96 - 97 °C.  $[\alpha]_D^{20} = +100$  ( $c = 1.0$ ,  $\text{CHCl}_3$ ). Dr (>20:1) determined by  $^1\text{H}$  and  $^{19}\text{F}$  NMR analysis. 91% ee was determined by HPLC analysis (Daicel Chiralcel IA column, hexane/2-propanol 9:1, 1.0 mL/min). Retention time:  $t_{\text{major}} = 9.3$  min and  $t_{\text{minor}} = 6.8$  min.  $^1\text{H}$  NMR (300 MHz,  $\text{CDCl}_3$ )  $\delta$  7.57 (ddd,  $J = 10.5, 7.5, 4.8$  Hz, 6H), 7.49 – 7.41 (m, 3H), 7.39 – 7.16 (m, 7H), 7.04 (dd,  $J = 8.1, 1.6$  Hz, 1H), 6.75 (d,  $J = 1.5$  Hz, 1H), 5.75 (d,  $J = 10.1$  Hz, 1H), 5.57 – 5.38 (m, 1H), 3.49 (d,  $J = 9.8$  Hz, 1H), 2.34 (s, 3H).  $^{13}\text{C}$  NMR (100 MHz,  $\text{CDCl}_3$ )  $\delta$  172.7, 169.5, 153.7, 144.1, 135.5, 131.4, 129.8, 129.5, 127.9, 127.9, 127.8, 127.6, 127.4, 127.1, 125.3, 125.0 (q,  $J_{\text{C-F}} = 278.3$  Hz), 124.8, 124.6, 124.0, 121.0, 119.0, 110.6, 71.7, 69.0, 60.4 (q,  $J_{\text{C-F}} = 30.7$  Hz), 47.0, 24.1.  $^{19}\text{F}$  NMR (282 MHz,  $\text{CDCl}_3$ )  $\delta$  -72.1; HRMS (ESI)  $m/z$  calcd for  $\text{C}_{33}\text{H}_{25}\text{BrF}_3\text{N}_4\text{O}_2$   $[\text{M}+\text{H}]^+$ : 645.1107, found 645.1103.

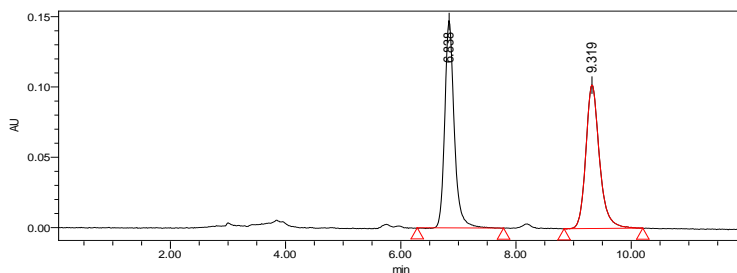

|   | Retention Time | Area    | % Area | Height | Int Type | Peak Type |
|---|----------------|---------|--------|--------|----------|-----------|
| 1 | 6.838          | 1689636 | 50.17  | 147392 | bb       | Unknown   |
| 2 | 9.319          | 1678142 | 49.83  | 102341 | bb       | Unknown   |

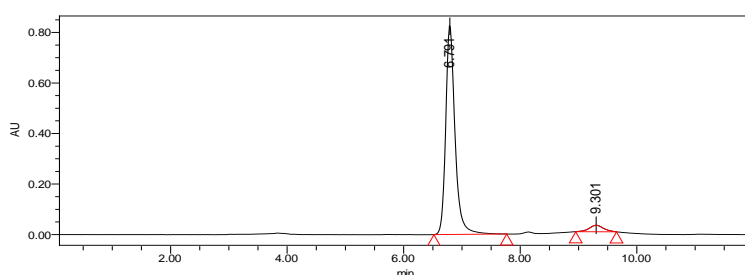

|   | Retention Time | Area    | % Area | Height | Int Type | Peak Type |
|---|----------------|---------|--------|--------|----------|-----------|
| 1 | 6.791          | 9152712 | 95.46  | 829679 | bb       | Unknown   |
| 2 | 9.301          | 434873  | 4.54   | 25683  | bb       | Unknown   |

**(3*S*,3'*S*,4'*R*,5'*R*)-7-fluoro-1-methyl-1'',3'',4'-triphenyl-5'-(trifluoromethyl)dispiro [indoline-3,2'-pyrrolidine-3',4''-pyrazole]-2,5''(1''H)-dione (**3ak**)**

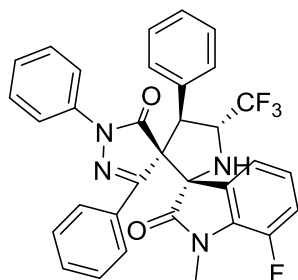

From 52 mg (0.20 mmol) 7-fluoro-1-methyl-3-((2,2,2-trifluoroethyl)imino)indolin-2-one and 71.28 mg (0.22 mmol, 1.1 equiv) 4-benzylidene-2,5-diphenyl-2,4-dihydro-3H-pyrazol-3-one, 97.1 mg (83% yield) compound **3ak** was obtained as light yellow solid, mp = 89 - 90 °C.  $[\alpha]_D^{20} = +119$  ( $c = 1.0$ ,  $\text{CHCl}_3$ ). Dr (>20:1) determined by  $^1\text{H}$  and  $^{19}\text{F}$  NMR analysis. 91% ee was determined by HPLC analysis (Daicel Chiralcel IA column, hexane/2-propanol 9:1, 1.0 mL/min). Retention time:  $t_{\text{major}} = 6.8$  min and  $t_{\text{minor}} = 5.6$  min.  $^1\text{H}$  NMR (300 MHz,  $\text{CDCl}_3$ )  $\delta$  7.65 – 7.46 (m, 10H), 7.37 – 7.28 (m, 3H), 7.21 (dt,  $J = 14.8, 4.7$  Hz, 3H), 6.74 (t,  $J = 7.9$  Hz, 1H), 5.76 (d,  $J = 10.1$  Hz, 1H), 5.62 – 5.38 (m, 1H), 3.46 (d,  $J = 9.7$  Hz, 1H), 3.22 (dd,  $J = 9.8, 3.8$  Hz, 1H), 2.72 (s, 3H).  $^{13}\text{C}$  NMR (100 MHz,  $\text{CDCl}_3$ )  $\delta$  173.7, 170.5, 154.7, 148.6, 146.1, 136.6, 132.6,

130.9, 130.6, 130.5, 129.0, 128.9, 128.8, 128.6, 128.5, 128.2, 126.3, 126.0, 126.0 (q,  $J_{C-F} = 278.7$  Hz), 126.0, 123.4 (d,  $J_{C-F} = 4.5$  Hz), 120.4, 120.4, 120.1, 119.1 (d,  $J_{C-F} = 14.3$  Hz), 73.0, 70.5, 61.6 (q,  $J_{C-F} = 30.7$  Hz). 47.9, 27.6, 27.6.  $^{19}\text{F}$  NMR (282 MHz,  $\text{CDCl}_3$ )  $\delta$  -72.1, 136.0; HRMS (ESI)  $m/z$  calcd for  $\text{C}_{33}\text{H}_{24}\text{F}_4\text{N}_4\text{NaO}_2$   $[\text{M}+\text{Na}]^+$ : 607.1728, found 607.1731.

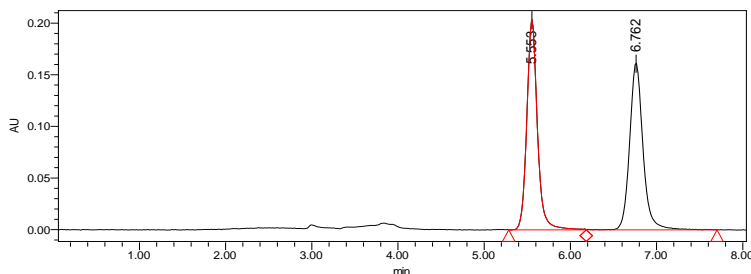

|   | Retention Time | Area    | % Area | Height | Int Type | Peak Type |
|---|----------------|---------|--------|--------|----------|-----------|
| 1 | 5.553          | 1745888 | 50.01  | 203561 | bv       | Unknown   |
| 2 | 6.762          | 1745299 | 49.99  | 161728 | vb       | Unknown   |

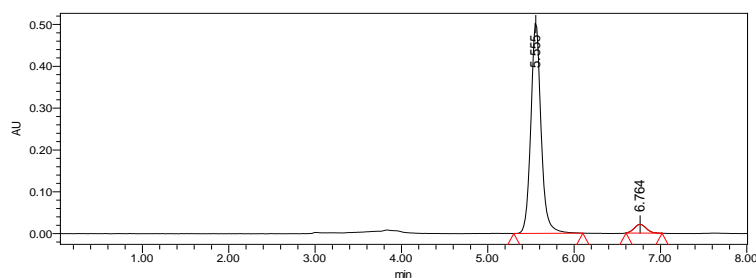

|   | Retention Time | Area    | % Area | Height | Int Type | Peak Type |
|---|----------------|---------|--------|--------|----------|-----------|
| 1 | 5.555          | 4136089 | 95.36  | 503981 | bb       | Unknown   |
| 2 | 6.764          | 201380  | 4.64   | 21065  | bb       | Unknown   |

**(3*S*,3'*S*,4'*R*,5'*R*)-7-chloro-1-methyl-1'',3'',4'-triphenyl-5'-(trifluoromethyl)dispiro [indoline-3,2'-pyrrolidine-3',4'-pyrazole]-2,5''(1''H)-dione (3a)**

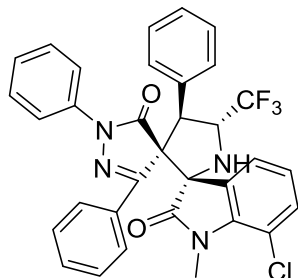

From 55.4 mg (0.20 mmol) 7-chloro-1-methyl-3-((2,2,2-trifluoroethyl)imino)indolin-2-one and 71.28 mg (0.22 mmol, 1.1 equiv) 4-benzylidene-2,5-diphenyl-2,4-dihydro-3H-pyrazol-3-one, 99.8 mg (83% yield) compound **3a** was obtained as light yellow solid, mp = 105 - 106 °C.  $[\alpha]_{\text{D}}^{20} = +74$  ( $c = 1.0$ ,  $\text{CHCl}_3$ ). Dr (>20:1) determined by  $^1\text{H}$  and  $^{19}\text{F}$  NMR analysis. 90% ee was determined by HPLC

analysis (Daicel Chiralcel IA column, hexane/2-propanol 9:1, 1.0 mL/min). Retention time:  $t_{\text{major}} = 6.9$  min and  $t_{\text{minor}} = 5.7$  min.  $^1\text{H}$  NMR (300 MHz,  $\text{CDCl}_3$ )  $\delta$  7.49 (dtd,  $J = 10.6, 7.5, 4.0$  Hz, 10H), 7.33 (t,  $J = 7.9$  Hz, 2H), 7.27 – 7.14 (m, 4H), 6.89 (t,  $J = 7.4$  Hz, 1H), 6.59 (d,  $J = 7.7$  Hz, 1H), 5.79 (d,  $J = 10.1$  Hz, 1H), 5.46 (dd,  $J = 15.8, 8.2$  Hz, 1H), 3.54 (d,  $J = 9.4$  Hz, 1H), 2.35 (s, 3H).  $^{13}\text{C}$  NMR (100 MHz,  $\text{CDCl}_3$ )  $\delta$  174.3, 170.4, 154.7, 139.6, 136.5, 133.3, 132.5, 130.8, 130.6, 128.9, 128.9, 128.8, 128.6, 128.5, 128.2, 126.3, 126.0, 126.0 (q,  $J_{\text{C-F}} = 278.3$  Hz), 123.4, 122.9, 120.1, 115.6, 73.0, 70.1, 61.5 (q,  $J_{\text{C-F}} = 30.7$  Hz), 47.9, 28.5.  $^{19}\text{F}$  NMR (282 MHz,  $\text{CDCl}_3$ )  $\delta$  -72.1; HRMS (ESI)  $m/z$  calcd for  $\text{C}_{33}\text{H}_{24}\text{ClF}_3\text{N}_4\text{NaO}_2$   $[\text{M}+\text{Na}]^+$ : 623.1432, found 623.1441.

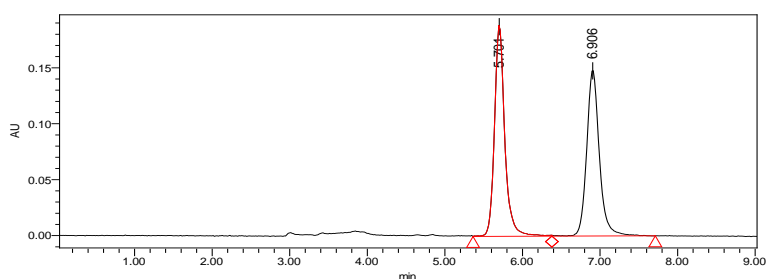

|   | Retention Time | Area    | % Area | Height | Int Type | Peak Type |
|---|----------------|---------|--------|--------|----------|-----------|
| 1 | 5.701          | 1742745 | 50.94  | 188590 | bv       | Unknown   |
| 2 | 6.906          | 1678381 | 49.06  | 148490 | vb       | Unknown   |

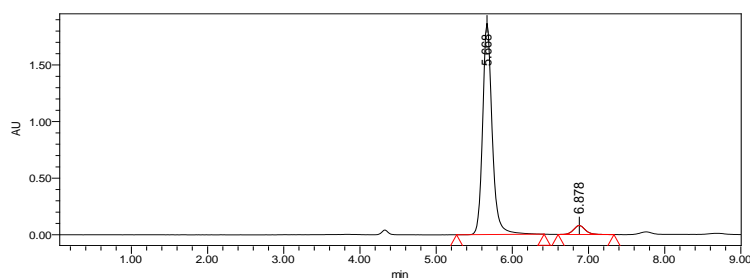

|   | Retention Time | Area     | % Area | Height  | Int Type | Peak Type |
|---|----------------|----------|--------|---------|----------|-----------|
| 1 | 5.668          | 16214718 | 95.00  | 1867369 | bb       | Unknown   |
| 2 | 6.878          | 853404   | 5.00   | 79877   | bb       | Unknown   |

**(3S,3'S,4'R,5'R)-7-bromo-1-methyl-1'',3'',4'-triphenyl-5'-(trifluoromethyl)dispiro[indoline-3,2'-pyrrolidine-3',4''-pyrazole]-2,5''(1''H)-dione (3am)**

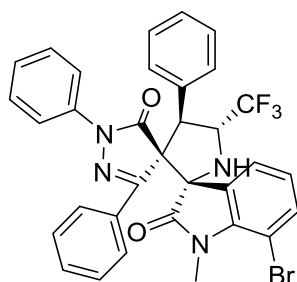



From 64.2 mg (0.20 mmol) 7-bromo-1-methyl-3-((2,2,2-trifluoroethyl) imino)indolin-2-one and 71.28 mg (0.22 mmol, 1.1 equiv) 4-benzylidene-2,5-diphenyl-2,4-dihydro-3H-pyrazol -3-one, 109.6 mg (85% yield) compound **3am** was obtained as light yellow solid, mp = 108 - 109 °C.  $[\alpha]_D^{20} = +168$  ( $c = 1.0$ ,  $\text{CHCl}_3$ ). Dr (>20:1) determined by  $^1\text{H}$  and  $^{19}\text{F}$  NMR analysis. 93% ee was determined by HPLC analysis (Daicel Chiralcel IA column, hexane /2-propanol 9:1, 1.0 mL/min). Retention time:  $t_{\text{major}} = 7.0$  min and  $t_{\text{minor}} = 5.8$  min.  $^1\text{H}$  NMR (300 MHz,  $\text{CDCl}_3$ )  $\delta$  7.56 (dddd,  $J = 12.9, 8.8, 5.5, 2.6$  Hz, 11H), 7.37 – 7.28 (m, 3H), 7.25 – 7.15 (m, 3H), 6.74 (t,  $J = 7.9$  Hz, 1H), 5.76 (d,  $J = 10.1$  Hz, 1H), 5.59 – 5.42 (m, 1H), 3.51 – 3.41 (m, 1H), 3.22 (dd,  $J = 9.8, 3.8$  Hz, 1H), 2.72 (s, 3H).  $^{13}\text{C}$  NMR (100 MHz,  $\text{CDCl}_3$ )  $\delta$  174.4, 170.4, 154.7, 141.1, 136.7, 136.5, 132.5, 130.9, 130.6, 129.0, 128.9, 128.9, 128.6, 128.5, 128.3, 126.4, 126.0 (q,  $J_{\text{C-F}} = 278.3$ Hz), 126.3, 123.8, 123.4, 120.1, 102.4, 73.1, 70.1, 61.5 (q,  $J_{\text{C-F}} = 30.7$  Hz), 48.0, 28.7.  $^{19}\text{F}$  NMR (282 MHz,  $\text{CDCl}_3$ )  $\delta$  -72.1; HRMS (ESI)  $m/z$  calcd for  $\text{C}_{33}\text{H}_{24}\text{BrF}_3\text{N}_4\text{NaO}_2$   $[\text{M}+\text{Na}]^+$ : 667.0927, found 667.0930.

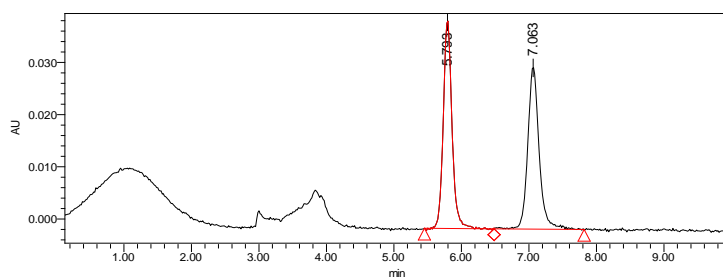

|   | Retention Time | Area   | % Area | Height | Int Type | Peak Type |
|---|----------------|--------|--------|--------|----------|-----------|
| 1 | 5.793          | 360379 | 49.69  | 39777  | bv       | Unknown   |
| 2 | 7.063          | 364833 | 50.31  | 31086  | vb       | Unknown   |

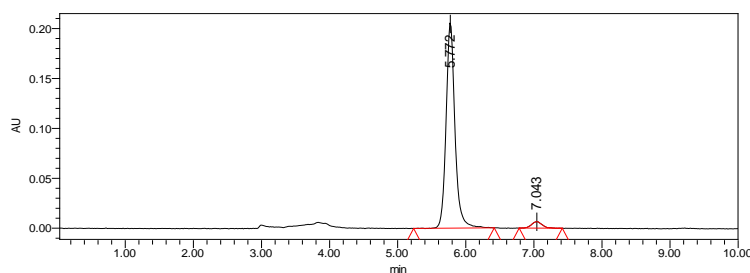

|   | Retention Time | Area    | % Area | Height | Int Type | Peak Type |
|---|----------------|---------|--------|--------|----------|-----------|
| 1 | 5.772          | 1866741 | 96.41  | 205914 | bb       | Unknown   |
| 2 | 7.043          | 69596   | 3.59   | 6442   | bb       | Unknown   |

**(3*S*,3'*S*,4*R*,5'*R*)-4'-(4-fluorophenyl)-1-methyl-1'',3''-diphenyl-5'-(trifluoromethyl)dispiro[indoline-3,2'-pyrrolidine-3',4''-pyrazole]-2,5''(1''*H*)-dione (3*ba*)**

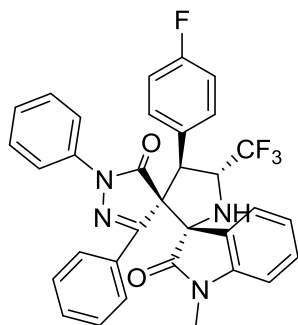

From 48.2 mg (0.20 mmol) 1-methyl-3-((2,2,2-trifluoroethyl)imino)indolin-2-on and 75.24 mg (0.22 mmol, 1.1 equiv) 4-(4-fluorobenzylidene)-2,5-diphenyl-2,4-dihydro-3*H*-pyrazol-3-one, 99.5 mg (85% yield) compound **3ba** was obtained as light yellow solid, mp = 112 - 114 °C.  $[\alpha]_D^{20} = +146$  ( $c = 1.0$ ,  $\text{CHCl}_3$ ). Dr (>20:1) determined by  $^1\text{H}$  and  $^{19}\text{F}$  NMR analysis. 94% ee was determined by HPLC analysis (Daicel Chiralcel IA column, hexane/2-propanol 9:1, 1.0 mL/min). Retention time:  $t_{\text{major}} = 7.9$  min and  $t_{\text{minor}} = 7.1$  min.  $^1\text{H}$  NMR (300 MHz,  $\text{CDCl}_3$ )  $\delta$  7.64 – 7.51 (m, 6H), 7.51 – 7.38 (m, 4H), 7.32 (dd,  $J = 10.7, 5.0$  Hz, 2H), 7.20 (dt,  $J = 14.8, 4.2$  Hz, 2H), 6.91 (dt,  $J = 15.4, 8.1$  Hz, 3H), 6.58 (d,  $J = 7.7$  Hz, 1H), 5.81 (d,  $J = 10.0$  Hz, 1H), 5.47 (d,  $J = 7.1$  Hz, 1H), 3.55 (d,  $J = 8.7$  Hz, 1H), 2.34 (s, 3H).  $^{13}\text{C}$  NMR (75 MHz,  $\text{CDCl}_3$ )  $\delta$  173.9, 170.6, 164.2, 160.9, 154.8, 143.8, 136.6, 131.2, 130.9, 130.5, 130.4, 130.3, 128.9, 128.7, 128.1, 126.4, 126.1 (q,  $J_{\text{C-F}} = 278.3$  Hz), 124.4, 122.9 (d,  $J_{\text{C-F}} = 6$  Hz), 120.0, 116.0 (d,  $J_{\text{C-F}} = 21.8$  Hz), 108.2, 72.9, 70.5, 62.3 (q,  $J_{\text{C-F}} = 30.8$  Hz), 47.2, 25.0.  $^{19}\text{F}$  NMR (282 MHz,  $\text{CDCl}_3$ )  $\delta$  -72.0, 113.1; HRMS (ESI)  $m/z$  calcd for  $\text{C}_{33}\text{H}_{24}\text{F}_4\text{N}_4\text{NaO}_2$   $[\text{M}+\text{Na}]^+$ : 607.1728, found 607.1730.

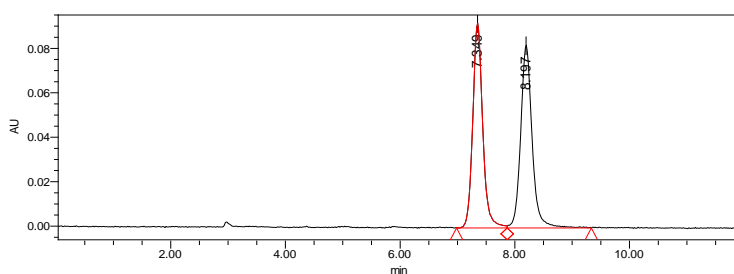

|   | Retention Time | Area    | % Area | Height | Int Type | Peak Type |
|---|----------------|---------|--------|--------|----------|-----------|
| 1 | 7.349          | 1114070 | 49.41  | 92109  | bv       | Unknown   |
| 2 | 8.197          | 1140827 | 50.59  | 82001  | vb       | Unknown   |

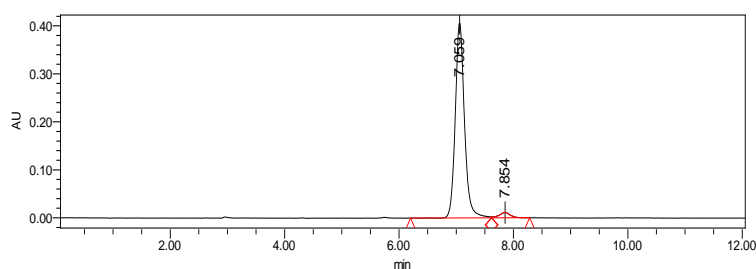

|   | Retention Time | Area    | % Area | Height | Int Type | Peak Type |
|---|----------------|---------|--------|--------|----------|-----------|
| 1 | 7.059          | 4548931 | 96.81  | 406860 | bv       | Unknown   |
| 2 | 7.854          | 149719  | 3.19   | 11097  | vb       | Unknown   |

**(3*S*,3'*S*,4'*R*,5'*R*)-4'-(4-chlorophenyl)-1-methyl-1'',3''-diphenyl-5'-(trifluoromethyl)dispiro[indoline-3,2'-pyrrolidine-3',4''-pyrazole]-2,5''(1''*H*)-dione (3ca)**

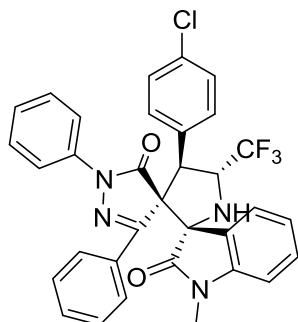

From 48.2 mg (0.20 mmol) 1-methyl-3-((2,2,2-trifluoroethyl)imino)indolin-2-one and 78.98 mg (0.22 mmol, 1.1 equiv) 4-(4-chlorobenzylidene)-2,5-diphenyl-2,4-dihydro-3*H*-pyrazol-3-one, 101.0 mg (84% yield) compound **3ca** was obtained as light yellow solid, mp = 216 - 217 °C.  $[\alpha]_D^{20} = +169$  ( $c = 1.0$ ,  $\text{CHCl}_3$ ). Dr (>20:1) determined by  $^1\text{H}$  and  $^{19}\text{F}$  NMR analysis. 90% ee was determined by HPLC analysis (Daicel Chiralcel IA column, hexane/2-propanol 9:1, 1.0 mL/min). Retention time:  $t_{\text{major}} = 8.0$  min and  $t_{\text{minor}} = 7.4$  min.  $^1\text{H}$  NMR (300 MHz,  $\text{CDCl}_3$ )  $\delta$  7.49 (dtd,  $J = 10.6, 7.5, 4.0$  Hz, 10H), 7.33 (t,  $J = 7.9$  Hz, 2H), 7.27 - 7.14 (m, 4H), 6.89 (t,  $J = 7.4$  Hz, 1H), 6.59 (d,  $J = 7.7$  Hz, 1H), 5.79 (d,  $J = 10.1$  Hz, 1H), 5.46 (dd,  $J = 15.8, 8.2$  Hz, 1H), 3.54 (d,  $J = 9.4$  Hz, 1H), 2.35 (s, 3H).  $^{13}\text{C}$  NMR (75 MHz,  $\text{CDCl}_3$ )  $\delta$  173.8, 170.5, 154.6, 143.7, 136.5, 134.4, 131.5, 131.1, 130.8, 130.5, 129.9, 129.1, 128.9, 128.6, 128.1, 126.3, 125.9 (q,  $J_{\text{C-F}} = 278.5$  Hz), 124.3, 122.9, 122.7, 120.0, 108.2, 72.7, 70.5, 61.7 (q,  $J_{\text{C-F}} = 30.8$  Hz), 47.2, 25.0.  $^{19}\text{F}$  NMR (282 MHz,  $\text{CDCl}_3$ )  $\delta$  -72.0; HRMS (ESI)  $m/z$  calcd for  $\text{C}_{33}\text{H}_{25}\text{ClF}_3\text{N}_4\text{O}_2$   $[\text{M}+\text{H}]^+$ : 601.1613, found 601.1609.

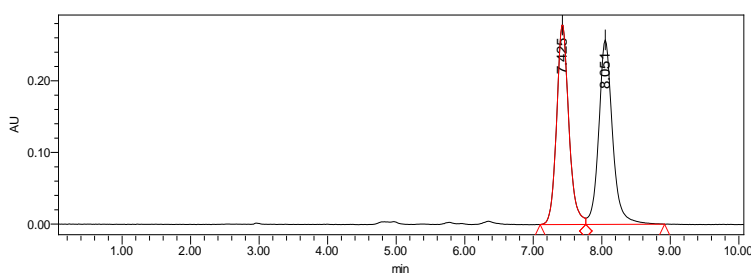

|   | Retention Time | Area    | % Area | Height | Int Type | Peak Type |
|---|----------------|---------|--------|--------|----------|-----------|
| 1 | 7.425          | 3449087 | 48.96  | 279994 | bv       | Unknown   |
| 2 | 8.051          | 3595732 | 51.04  | 257463 | vb       | Unknown   |

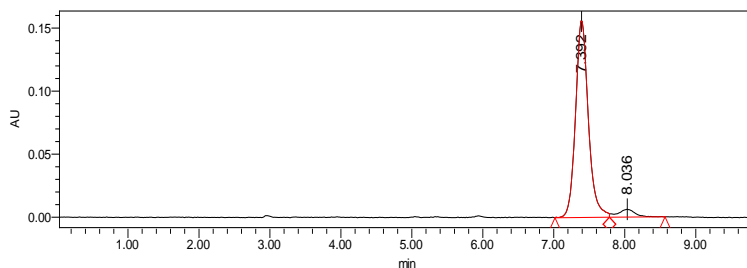

|   | Retention Time | Area    | % Area | Height | Int Type | Peak Type |
|---|----------------|---------|--------|--------|----------|-----------|
| 1 | 7.392          | 1961816 | 94.92  | 156590 | bv       | Unknown   |
| 2 | 8.036          | 105007  | 5.08   | 6186   | vb       | Unknown   |

**(3*S*,3'*S*,4'*R*,5'*R*)-4'-(4-bromophenyl)-1-methyl-1'',3''-diphenyl-5'-(trifluoromethyl)dispiro[indoline-3,2'-pyrrolidine-3',4''-pyrazole]-2,5''(1''*H*)-dione (3da)**

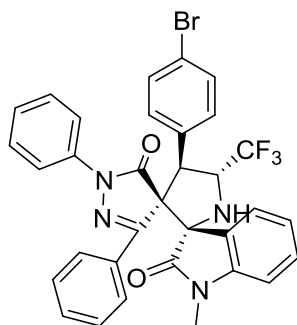

From 48.2 mg (0.20 mmol) 1-methyl-3-((2,2,2-trifluoroethyl)imino)indolin-2-one and 88.66 mg (0.22 mmol, 1.1 equiv) 4-(4-bromobenzylidene)-2,5-diphenyl-2,4-dihydro-3*H*-pyrazol-3-one, 110.9 mg (86% yield) compound **3da** was obtained as light yellow solid, mp = 118 - 119 °C.  $[\alpha]_D^{20} = +130$  ( $c = 1.0$ , CHCl<sub>3</sub>). Dr (>20:1) determined by <sup>1</sup>H and <sup>19</sup>F NMR analysis. 92% ee was determined by HPLC analysis (Daicel Chiralcel IA column, hexane/2-propanol 9:1, 1.0 mL/min). Retention time:  $t_{\text{major}} = 8.9$  min and  $t_{\text{minor}} = 8.0$  min. <sup>1</sup>H NMR (300 MHz, CDCl<sub>3</sub>) δ 7.59 – 7.51 (m, 4H), 7.51 – 7.29 (m, 10H), 7.28 – 7.13 (m, 2H), 6.89 (t,  $J = 7.6$  Hz, 1H), 6.60 (d,  $J = 7.8$  Hz, 1H), 5.77 (d,  $J = 10.1$  Hz, 1H), 5.45 (d,  $J = 7.5$  Hz, 1H), 3.53 (d,  $J = 8.6$  Hz, 1H), 2.35 (s, 3H). <sup>13</sup>C NMR (75 MHz, CDCl<sub>3</sub>) δ 173.8, 170.5, 154.7, 143.8, 136.5, 132.2, 132.1, 131.2, 130.8, 130.5, 130.3, 129.0, 128.7, 128.1, 126.4, 126.0 (q,  $J_{\text{C-F}} = 278.5$  Hz), 124.3, 123.0, 122.7, 122.7, 120.0, 108.2, 72.7, 70.6, 61.7 (q,  $J_{\text{C-F}} = 30.8$  Hz), 47.3, 25.0. <sup>19</sup>F NMR (282 MHz, CDCl<sub>3</sub>) δ -72.0; HRMS (ESI)  $m/z$  calcd for C<sub>33</sub>H<sub>24</sub>BrF<sub>3</sub>N<sub>4</sub>NaO<sub>2</sub> [M+Na]<sup>+</sup>: 667.0927, found 667.0926.

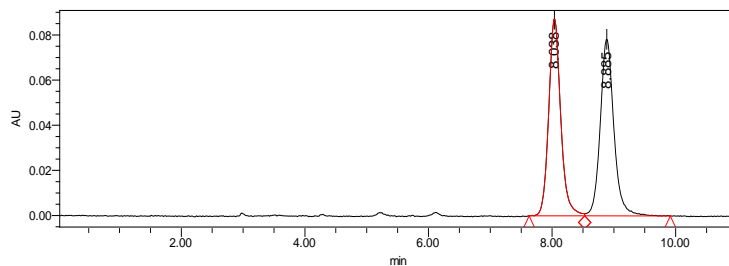

|   | Retention Time | Area    | % Area | Height | Int Type | Peak Type |
|---|----------------|---------|--------|--------|----------|-----------|
| 1 | 8.038          | 1176929 | 49.51  | 87442  | bv       | Unknown   |
| 2 | 8.885          | 1200443 | 50.49  | 78455  | vb       | Unknown   |

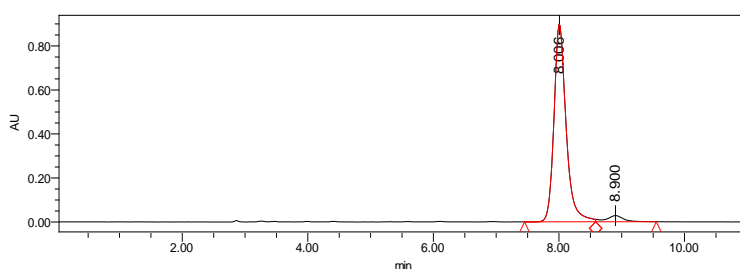

|   | Retention Time | Area     | % Area | Height | Int Type | Peak Type |
|---|----------------|----------|--------|--------|----------|-----------|
| 1 | 8.006          | 12086575 | 95.75  | 900003 | bv       | Unknown   |
| 2 | 8.900          | 536523   | 4.25   | 28232  | vb       | Unknown   |

**(3*S*,3'*S*,4'*R*,5'*R*)-1-methyl-1'',3''-diphenyl-4'-(*p*-tolyl)-5'-(trifluoromethyl)dispiro [indoline-3,2'-pyrrolidine-3',4''-pyrazole]-2,5''(1''H)-dione (**3ea**)**

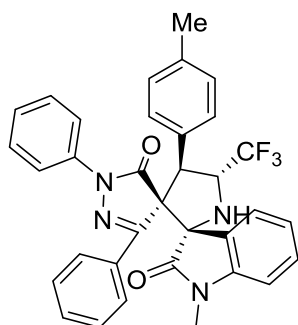

From 48.2 mg (0.20 mmol) 1-methyl-3-((2,2,2-trifluoroethyl)imino)indolin-2-one and 74.36 mg (0.22 mmol, 1.1 equiv) 4-(4-methylbenzylidene)-2,5-diphenyl-2,4-dihydro-3*H*-pyrazol-3-one, 98.8 mg (85% yield) compound **3ea** was obtained as light yellow solid, mp = 126 - 127 °C.  $[\alpha]_D^{20} = +128$  ( $c = 1.0$ ,  $\text{CHCl}_3$ ). Dr (>20:1) determined by  $^1\text{H}$  and  $^{19}\text{F}$  NMR analysis. 90% ee was determined by HPLC analysis (Daicel Chiralcel IA column, hexane/2-propanol 9:1, 1.0 mL/min). Retention time:  $t_{\text{major}} = 8.0$  min and  $t_{\text{minor}} = 6.7$  min.  $^1\text{H}$  NMR (300 MHz,  $\text{CDCl}_3$ )  $\delta$  7.56 (d,  $J = 7.6$  Hz, 4H), 7.49 (d,  $J = 8.2$  Hz, 3H), 7.45 – 7.39 (m, 3H), 7.30 (t,  $J = 7.8$  Hz, 2H), 7.25 – 7.12 (m, 2H), 7.04 (d,  $J = 8.0$  Hz, 2H), 6.86 (t,  $J = 7.6$  Hz, 1H), 6.57 (d,  $J = 7.8$  Hz, 1H), 5.79 (d,  $J = 10.1$

Hz, 1H), 5.48 (dd,  $J = 15.8, 8.1$  Hz, 1H), 3.54 (d,  $J = 9.2$  Hz, 1H), 2.33 (s, 3H), 2.19 (s, 3H).  $^{13}\text{C}$  NMR (75 MHz,  $\text{CDCl}_3$ )  $\delta$  174.0, 170.8, 155.1, 143.8, 138.3, 136.8, 131.1, 130.4, 129.8, 129.7, 128.9, 128.8, 128.4, 128.1, 128.1 (q,  $J_{\text{C-F}} = 185.7$  Hz), 126.2, 124.4, 123.0, 122.9, 120.1, 108.2, 73.0, 70.6, 61.8 (q,  $J_{\text{C-F}} = 30.2$  Hz), 47.7, 25.0, 21.0.  $^{19}\text{F}$  NMR (282 MHz,  $\text{CDCl}_3$ )  $\delta$  -72.0; HRMS (ESI)  $m/z$  calcd for  $\text{C}_{34}\text{H}_{27}\text{F}_3\text{N}_4\text{NaO}_2$   $[\text{M}+\text{Na}]^+$ : 603.1978, found 603.1972.

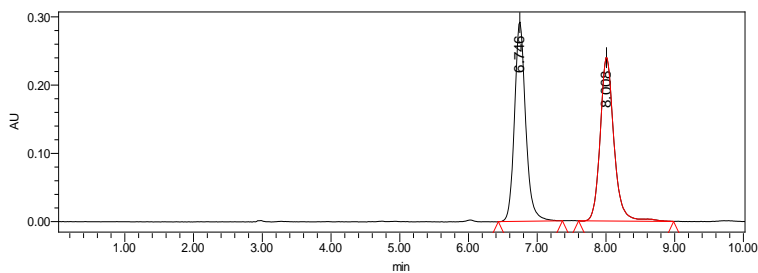

|   | Retention Time | Area    | % Area | Height | Int Type | Peak Type |
|---|----------------|---------|--------|--------|----------|-----------|
| 1 | 6.746          | 3290938 | 49.65  | 292239 | bb       | Unknown   |
| 2 | 8.008          | 3337091 | 50.35  | 240280 | bb       | Unknown   |

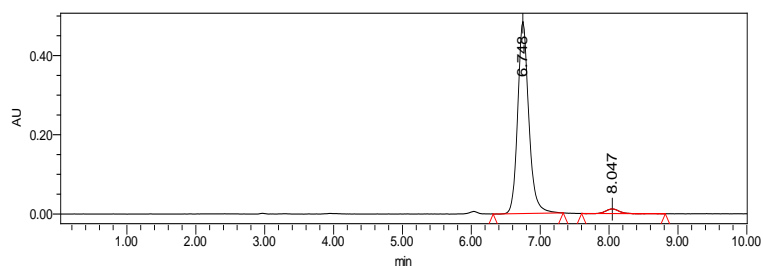

|   | Retention Time | Area    | % Area | Height | Int Type | Peak Type |
|---|----------------|---------|--------|--------|----------|-----------|
| 1 | 6.748          | 5409362 | 97.14  | 484222 | bb       | Unknown   |
| 2 | 8.047          | 159137  | 2.86   | 11698  | bb       | Unknown   |

**(3S,3'S,4'R,5'R)-4'-(4-methoxyphenyl)-1-methyl-1'',3''-diphenyl-5'-(trifluoromethyl)dispiro[indoline-3,2'-pyrrolidine-3',4''-pyrazole]-2,5''(1''H)-dione (3fa)**

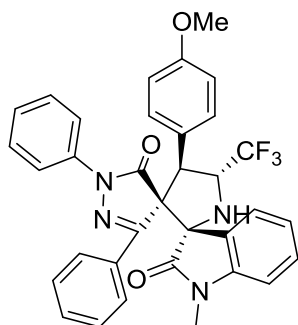

From 48.2 mg (0.20 mmol) 1-methyl-3-((2,2,2-trifluoroethyl)imino)indolin-2-one and 77.88 mg (0.22 mmol, 1.1 equiv) 4-(4-methoxybenzylidene)-2,5-diphenyl-

2,4-dihydro-3H-pyrazol-3-one, 100.1 mg (84% yield) compound **3fa** was obtained as light yellow solid, mp = 109 - 110 °C.  $[\alpha]_D^{20} = +145$  ( $c = 1.0$ ,  $\text{CHCl}_3$ ). Dr (>20:1) determined by  $^1\text{H}$  and  $^{19}\text{F}$  NMR analysis. 90% ee was determined by HPLC analysis (Daicel Chiralcel IA column, hexane/2-propanol 9:1, 1.0 mL/min). Retention time:  $t_{\text{major}} = 9.6$  min and  $t_{\text{minor}} = 8.4$  min.  $^1\text{H}$  NMR (300 MHz,  $\text{CDCl}_3$ )  $\delta$  7.64 – 7.47 (m, 8H), 7.47 – 7.38 (m, 3H), 7.33 (dd,  $J = 10.7, 5.0$  Hz, 2H), 7.21 (dt,  $J = 14.9, 6.2$  Hz, 2H), 6.89 (t,  $J = 7.6$  Hz, 1H), 6.78 (d,  $J = 8.8$  Hz, 2H), 6.59 (d,  $J = 7.7$  Hz, 1H), 5.78 (dd,  $J = 9.7, 6.8$  Hz, 1H), 5.56 – 5.34 (m, 1H), 3.66 (d,  $J = 9.0$  Hz, 3H), 3.52 (d,  $J = 9.1$  Hz, 1H), 2.35 (s, 3H).  $^{13}\text{C}$  NMR (75 MHz,  $\text{CDCl}_3$ )  $\delta$  173.9, 170.7, 159.4, 150.0, 143.7, 136.6, 131.0, 131.0, 130.3, 129.6, 128.8, 128.7, 128.0, 126.2, 126.1 (q,  $J_{\text{C-F}} = 278.5$  Hz), 124.6, 124.3, 123.0, 122.8, 120.0, 114.2, 108.1, 72.9, 70.4, 61.7 (q,  $J_{\text{C-F}} = 30.2$  Hz), 55.1, 47.3, 25.0.  $^{19}\text{F}$  NMR (282 MHz,  $\text{CDCl}_3$ )  $\delta$  -72.0; HRMS (ESI)  $m/z$  calcd for  $\text{C}_{34}\text{H}_{27}\text{F}_3\text{N}_4\text{NaO}_3$   $[\text{M}+\text{Na}]^+$ : 619.1927, found 619.1928.

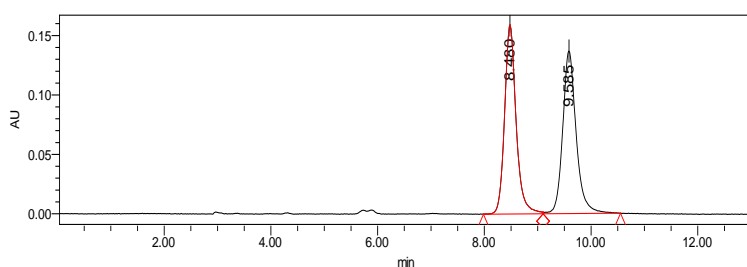

|   | Retention Time | Area    | % Area | Height | Int Type | Peak Type |
|---|----------------|---------|--------|--------|----------|-----------|
| 1 | 8.480          | 2388154 | 49.93  | 159377 | bv       | Unknown   |
| 2 | 9.585          | 2395011 | 50.07  | 137025 | vb       | Unknown   |

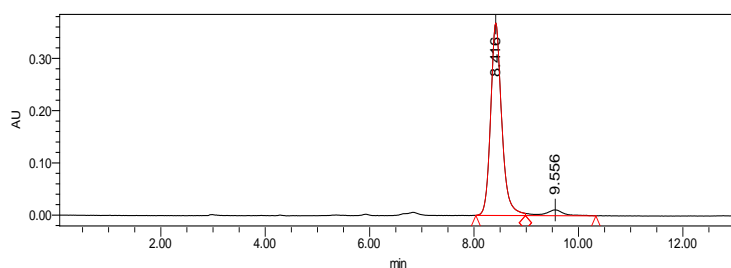

|   | Retention Time | Area    | % Area | Height | Int Type | Peak Type |
|---|----------------|---------|--------|--------|----------|-----------|
| 1 | 8.416          | 5420030 | 95.13  | 368805 | bv       | Unknown   |
| 2 | 9.556          | 277687  | 4.87   | 11045  | vb       | Unknown   |

**(3*S*,3'*S*,4'*R*,5'*R*)-4'-(3-fluorophenyl)-1-methyl-1'',3''-diphenyl-5'-(trifluoromethyl) dispiro[indoline-3,2'-pyrrolidine-3',4''-pyrazole]-2,5''(1''H)-dione (3ga)**

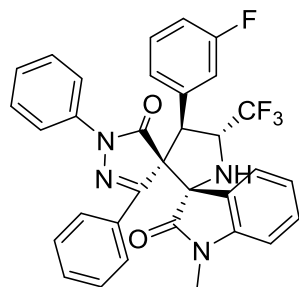

From 48.2 mg (0.20 mmol) 1-methyl-3-((2,2,2-trifluoroethyl)imino)indolin-2-one and 75.24 mg (0.22 mmol, 1.1 equiv) 4-(3-fluorobenzylidene)-2,5-diphenyl-2,4-dihydro-3H-pyrazol-3-one, 99.5 mg (85% yield) compound **3ga** was obtained as light yellow solid, mp = 108 - 109 °C.  $[\alpha]_D^{20} = +158$  ( $c = 1.0$ ,  $\text{CHCl}_3$ ). Dr (>20:1) determined by  $^1\text{H}$  and  $^{19}\text{F}$  NMR analysis. 94% ee was determined by HPLC analysis (Daicel Chiralcel IA column, hexane/2-propanol 9:1, 1.0 mL/min). Retention time:  $t_{\text{major}} = 9.3$  min and  $t_{\text{minor}} = 6.3$  min.  $^1\text{H}$  NMR (300 MHz,  $\text{CDCl}_3$ )  $\delta$  7.60 – 7.51 (m, 4H), 7.51 – 7.42 (m, 4H), 7.41 – 7.29 (m, 4H), 7.29 – 7.15 (m, 3H), 7.02 – 6.81 (m, 2H), 6.60 (d,  $J = 7.7$  Hz, 1H), 5.81 (dd,  $J = 10.0, 5.8$  Hz, 1H), 5.47 (s, 1H), 3.64 – 3.44 (m, 1H), 2.35 (s, 3H).  $^{13}\text{C}$  NMR (75 MHz,  $\text{CDCl}_3$ )  $\delta$  173.8, 170.5, 164.4, 161.1, 154.7, 143.8, 136.5, 135.6, 135.5, 131.2, 130.8, 130.6, 130.5, 130.5, 128.9, 128.7, 128.2, 126.4, 126.0 (q,  $J_{\text{C-F}} = 278.5$  Hz), 124.5, 124.5, 124.4, 122.8 (d,  $J_{\text{C-F}} = 18$  Hz), 120.1, 115.8, 115.6 (d,  $J_{\text{C-F}} = 19.5$  Hz), 108.2, 72.7, 70.6, 61.8 (q,  $J_{\text{C-F}} = 30.8$  Hz), 47.5, 25.0.  $^{19}\text{F}$  NMR (282 MHz,  $\text{CDCl}_3$ )  $\delta$  -72.0, 111.4; HRMS (ESI)  $m/z$  calcd for  $\text{C}_{33}\text{H}_{24}\text{F}_4\text{N}_4\text{NaO}_2$   $[\text{M}+\text{Na}]^+$ : 607.1728, found 607.1729.

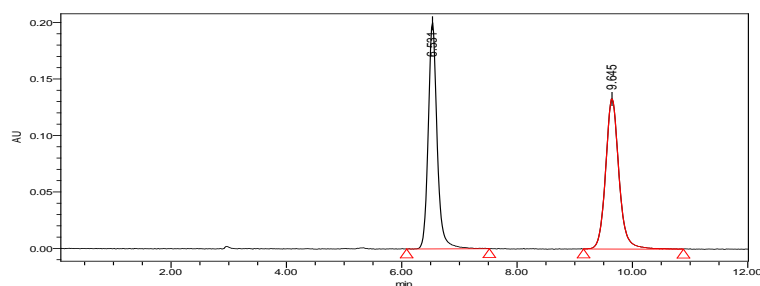

|   | Retention Time | Area    | % Area | Height | Int Type | Peak Type |
|---|----------------|---------|--------|--------|----------|-----------|
| 1 | 6.531          | 2148364 | 50.06  | 200245 | bb       | Unknown   |
| 2 | 9.645          | 2143620 | 49.94  | 133292 | bb       | Unknown   |



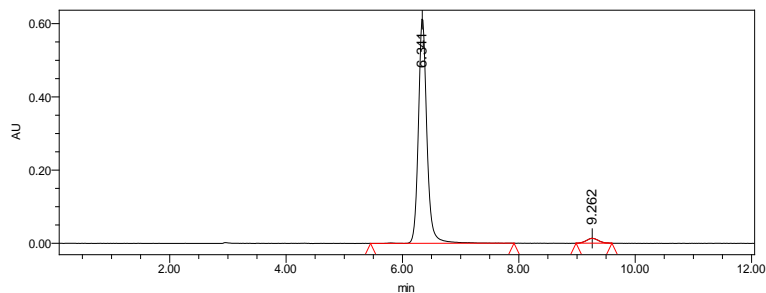

|   | Retention Time | Area    | % Area | Height | Int Type | Peak Type |
|---|----------------|---------|--------|--------|----------|-----------|
| 1 | 6.341          | 6225979 | 97.07  | 615824 | bb       | Unknown   |
| 2 | 9.262          | 187983  | 2.93   | 13292  | bb       | Unknown   |

**(3*S*,3'*S*,4'*R*,5'*R*)-4'-(3-chlorophenyl)-1-methyl-1'',3''-diphenyl-5'-(trifluoromethyl)dispiro[indoline-3,2'-pyrrolidine-3',4''-pyrazole]-2,5''(1''*H*)-dione (3ha)**

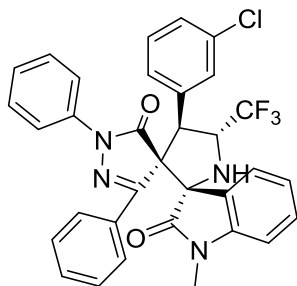

From 48.2 mg (0.20 mmol) 1-methyl-3-((2,2,2-trifluoroethyl)imino)indolin-2-one and 78.98 mg (0.22 mmol, 1.1 equiv) 4-(3-chlorobenzylidene)-2,5-diphenyl-2,4-dihydro-3*H*-pyrazol-3-one, 101.0 mg (84% yield) compound **3ha** was obtained as light yellow solid, mp = 145 - 146 °C.  $[\alpha]_D^{20} = +108$  ( $c = 1.0$ ,  $\text{CHCl}_3$ ). Dr (>20:1) determined by  $^1\text{H}$  and  $^{19}\text{F}$  NMR analysis. 92% ee was determined by HPLC analysis (Daicel Chiralcel IA column, hexane/2-propanol 9:1, 1.0 mL/min). Retention time:  $t_{\text{major}} = 9.8$  min and  $t_{\text{minor}} = 6.4$  min.  $^1\text{H}$  NMR (300 MHz,  $\text{CDCl}_3$ )  $\delta$  7.65 (s, 1H), 7.58 – 7.42 (m, 9H), 7.33 (t,  $J = 7.9$  Hz, 2H), 7.21 (pd,  $J = 7.9, 2.9$  Hz, 4H), 6.89 (dd,  $J = 11.2, 4.1$  Hz, 1H), 6.59 (d,  $J = 7.8$  Hz, 1H), 5.78 (d,  $J = 10.0$  Hz, 1H), 5.57 – 5.27 (m, 1H), 3.54 (d,  $J = 9.8$  Hz, 1H), 2.34 (s, 3H).  $^{13}\text{C}$  NMR (75 MHz,  $\text{CDCl}_3$ )  $\delta$  173.7, 170.4, 154.7, 143.7, 136.4, 135.1, 134.7, 131.1, 130.7, 130.5, 130.2, 128.9, 128.8, 128.6, 128.1, 126.9, 126.4, 125.9 (q,  $J_{\text{C-F}} = 278.7$  Hz), 124.4, 122.9, 122.7, 120.1, 108.2, 72.6, 70.5, 61.7 (q,  $J_{\text{C-F}} = 30.8$  Hz), 47.4, 25.0.  $^{19}\text{F}$  NMR (282 MHz,  $\text{CDCl}_3$ )  $\delta$  -72.0; HRMS (ESI)  $m/z$  calcd for  $\text{C}_{33}\text{H}_{25}\text{ClF}_3\text{N}_4\text{NaO}_2$   $[\text{M}+\text{H}]^+$ : 601.1613, found 601.1604.

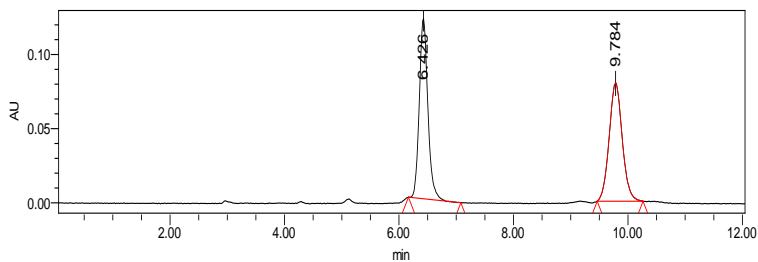

|   | Retention Time | Area    | % Area | Height | Int Type | Peak Type |
|---|----------------|---------|--------|--------|----------|-----------|
| 1 | 6.426          | 1267343 | 50.02  | 121611 | bb       | Unknown   |
| 2 | 9.784          | 1266150 | 49.98  | 79745  | bb       | Unknown   |

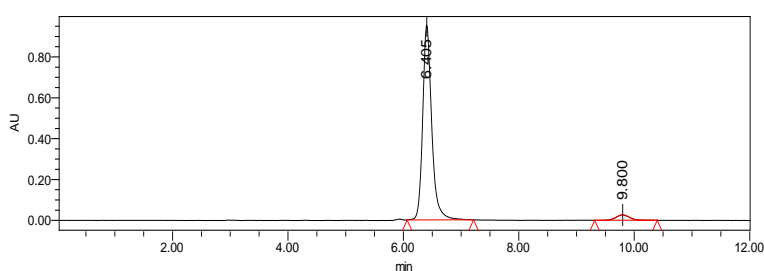

|   | Retention Time | Area     | % Area | Height | Int Type | Peak Type |
|---|----------------|----------|--------|--------|----------|-----------|
| 1 | 6.405          | 10387998 | 96.03  | 955836 | bb       | Unknown   |
| 2 | 9.800          | 429778   | 3.97   | 26697  | bb       | Unknown   |

**(3*S*,3'*S*,4'*R*,5'*R*)-4'-(3-bromophenyl)-1-methyl-1'',3''-diphenyl-5'-(trifluoromethyl)dispiro[indoline-3,2'-pyrrolidine-3',4''-pyrazole]-2,5''(1''H)-dione (3ia)**

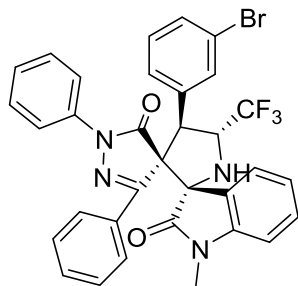

From 48.2 mg (0.20 mmol) 1-methyl-3-((2,2,2-trifluoroethyl)imino)indolin-2-one and 88.66 mg (0.22 mmol, 1.1 equiv) 4-(3-bromobenzylidene)-2,5-diphenyl-2,4-dihydro-3H-pyrazol-3-one, 117.3 mg (91% yield) compound **3ia** was obtained as light yellow solid, mp = 89 - 90 °C.  $[\alpha]_D^{20} = +6$  ( $c = 1.0$ ,  $\text{CHCl}_3$ ). Dr (>20:1) determined by  $^1\text{H}$  and  $^{19}\text{F}$  NMR analysis. 96% ee was determined by HPLC analysis (Daicel Chiralcel IA column, hexane/2-propanol 9:1, 1.0 mL/min). Retention time:  $t_{\text{major}} = 11.3$  min and  $t_{\text{minor}} = 6.9$  min.  $^1\text{H}$  NMR (300 MHz,  $\text{CDCl}_3$ )  $\delta$  7.79 (s, 1H), 7.59 – 7.11 (m, 16H), 6.92 (t,  $J = 7.6$  Hz, 1H), 6.62 (d,  $J = 7.7$  Hz, 1H), 5.75 (d,  $J = 10.1$  Hz, 1H), 5.52 – 5.34 (m, 1H), 3.52 (d,  $J = 9.9$  Hz, 1H), 2.36 (s, 3H).  $^{13}\text{C}$  NMR (75 MHz,  $\text{CDCl}_3$ )  $\delta$

173.8, 170.5, 154.7, 143.8, 136.5, 135.4, 131.8, 131.2, 130.8, 130.5, 128.9, 128.7, 128.2, 127.4, 126.5, 126.0 (q,  $J_{C-F} = 278.2$  Hz), 124.4, 123.0, 123.0, 122.7, 120.3, 108.2, 72.7, 70.5, 61.8 (q,  $J_{C-F} = 30.8$  Hz), 47.5, 25.0.  $^{19}F$  NMR (282 MHz,  $CDCl_3$ )  $\delta$  -72.0; HRMS (ESI)  $m/z$  calcd for  $C_{33}H_{24}BrF_3N_4NaO_2$   $[M+Na]^+$ : 667.0927, found 667.0927.

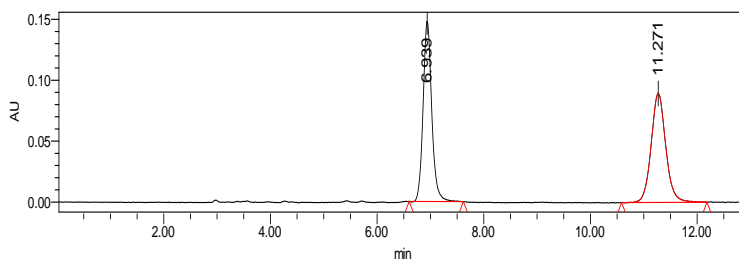

|   | Retention Time | Area    | % Area | Height | Int Type | Peak Type |
|---|----------------|---------|--------|--------|----------|-----------|
| 1 | 6.939          | 1669815 | 49.58  | 148097 | bb       | Unknown   |
| 2 | 11.271         | 1697910 | 50.42  | 89546  | bb       | Unknown   |

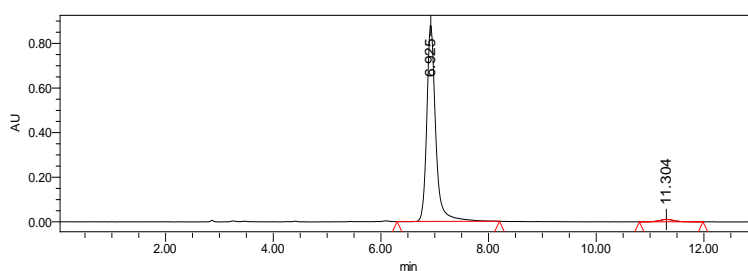

|   | Retention Time | Area     | % Area | Height | Int Type | Peak Type |
|---|----------------|----------|--------|--------|----------|-----------|
| 1 | 6.925          | 10178994 | 98.00  | 884075 | bb       | Unknown   |
| 2 | 11.304         | 208157   | 2.00   | 10943  | bb       | Unknown   |

**(3*S*,3'*S*,4'*R*,5'*R*)-1-methyl-1'',3''-diphenyl-4'-(*m*-tolyl)-5'-(trifluoromethyl)dispiro [indoline-3,2'-pyrrolidine-3',4''-pyrazole]-2,5''(1''H)-dione (3ja)**

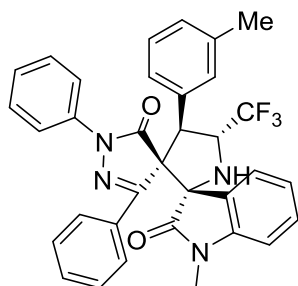

From 48.2 mg (0.20 mmol) 1-methyl-3-((2,2,2-trifluoroethyl)imino)indolin-2-one and 74.36 mg (0.22 mmol, 1.1 equiv) 4-(3-methylbenzylidene)-2,5-diphenyl-2,4-dihydro-3H-pyrazol-3-one, 100.0 mg (86% yield) compound **3ja** was obtained as light

yellow solid, mp = 195 - 196 °C.  $[\alpha]_D^{20} = + 178$  (c = 1.0, CHCl<sub>3</sub>). Dr (>20:1) determined by <sup>1</sup>H and <sup>19</sup>F NMR analysis. 93% ee was determined by HPLC analysis (Daicel Chiralcel IA column, hexane/2-propanol 9:1, 1.0 mL/min). Retention time:  $t_{\text{major}} = 8.5$  min and  $t_{\text{minor}} = 5.9$  min. <sup>1</sup>H NMR (300 MHz, CDCl<sub>3</sub>) δ 7.54 (dt,  $J = 8.7, 2.8$  Hz, 4H), 7.45 (dd,  $J = 7.9, 6.5$  Hz, 3H), 7.35 (dd,  $J = 16.3, 8.6$  Hz, 4H), 7.20 (ddd,  $J = 21.9, 15.2, 8.7$  Hz, 4H), 7.03 (d,  $J = 7.4$  Hz, 1H), 6.92 (t,  $J = 7.6$  Hz, 1H), 6.60 (d,  $J = 7.7$  Hz, 1H), 5.75 (d,  $J = 10.1$  Hz, 1H), 5.58 – 5.39 (m, 1H), 3.52 (d,  $J = 9.8$  Hz, 1H), 2.35 (s, 3H), 2.24 (s, 3H). <sup>13</sup>C NMR (75 MHz, CDCl<sub>3</sub>) δ 173.9, 170.7, 155.0, 143.7, 138.4, 136.6, 132.7, 131.0, 131.0, 130.3, 129.3, 129.1, 128.8, 128.7, 128.0, 126.2, 126.1 (q,  $J_{\text{C-F}} = 278.5$  Hz), 125.6, 124.4, 123.0, 122.8, 120.1, 108.1, 77.1 (q,  $J_{\text{C-F}} = 31.9$  Hz), 72.8, 70.3, 47.9, 24.9, 21.4. <sup>19</sup>F NMR (282 MHz, CDCl<sub>3</sub>) δ -71.9; HRMS (ESI) m/z calcd for C<sub>34</sub>H<sub>27</sub>F<sub>3</sub>N<sub>4</sub>NaO<sub>2</sub> [M+Na]<sup>+</sup>: 603.1978, found 603.1985.

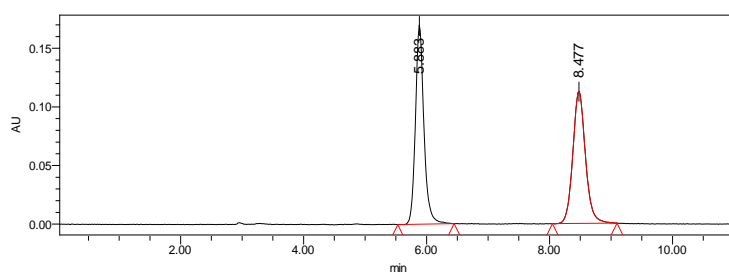

|   | Retention Time | Area    | % Area | Height | Int Type | Peak Type |
|---|----------------|---------|--------|--------|----------|-----------|
| 1 | 5.883          | 1631257 | 50.48  | 169642 | bb       | Unknown   |
| 2 | 8.477          | 1599940 | 49.52  | 112768 | bb       | Unknown   |

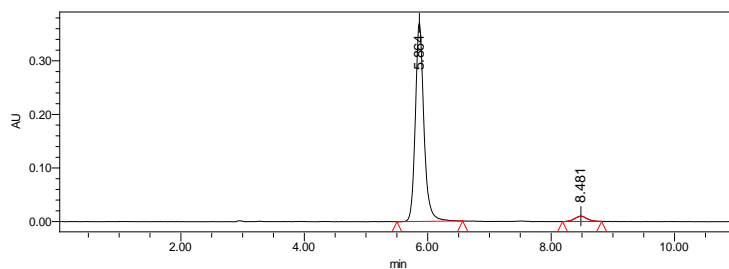

|   | Retention Time | Area    | % Area | Height | Int Type | Peak Type |
|---|----------------|---------|--------|--------|----------|-----------|
| 1 | 5.864          | 3576047 | 96.26  | 372003 | bb       | Unknown   |
| 2 | 8.481          | 138860  | 3.74   | 9955   | bb       | Unknown   |

**(3*S*,3'*S*,4'*R*,5'*R*)-4'-(3-methoxyphenyl)-1-methyl-1'',3''-diphenyl-5'-(trifluoromethyl)dispiro[indoline-3,2'-pyrrolidine-3',4''-pyrazole]-2,5''(1''*H*)-dione (3*ka*)**

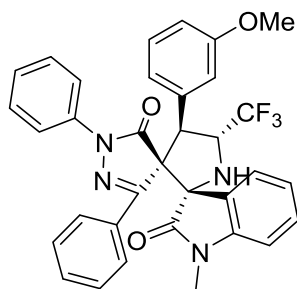

From 48.2 mg (0.20 mmol) 1-methyl-3-((2,2,2-trifluoroethyl)imino)indolin-2-one and 77.88 mg (0.22 mmol, 1.1 equiv) 4-(3-methoxybenzylidene)-2,5-diphenyl-2,4-dihydro-3*H*-pyrazol-3-one, 101.5 mg (85% yield) compound **3ka** was obtained as light yellow solid, mp = 138 - 139 °C.  $[\alpha]_D^{20} = +155$  ( $c = 1.0$ ,  $\text{CHCl}_3$ ). Dr (>20:1) determined by  $^1\text{H}$  and  $^{19}\text{F}$  NMR analysis. 96% ee was determined by HPLC analysis (Daicel Chiralcel IA column, hexane/2-propanol 9:1, 1.0 mL/min). Retention time:  $t_{\text{major}} = 10.3$  min and  $t_{\text{minor}} = 7.0$  min.  $^1\text{H}$  NMR (300 MHz,  $\text{CDCl}_3$ )  $\delta$  7.52 (dt,  $J = 25.3$ , 6.7 Hz, 5H), 7.46 – 7.37 (m, 3H), 7.21 (ddt,  $J = 14.7$ , 7.8, 5.5 Hz, 7H), 6.87 (t,  $J = 7.6$  Hz, 1H), 6.80 – 6.66 (m, 1H), 6.57 (d,  $J = 7.8$  Hz, 1H), 5.79 (d,  $J = 10.1$  Hz, 1H), 5.47 (dd,  $J = 16.5$ , 8.9 Hz, 1H), 3.60 (s, 4H), 2.33 (s, 3H).  $^{13}\text{C}$  NMR (75 MHz,  $\text{CDCl}_3$ )  $\delta$  173.8, 170.7, 159.7, 154.9, 143.7, 136.6, 134.3, 131.0, 130.9, 130.3, 129.9, 128.8, 128.7, 128.0, 126.2, 126.0, 61.8 (q,  $J_{\text{C-F}} = 278.5$  Hz), 124.3, 122.9, 120.9, 119.9, 114.1, 114.0, 108.1, 72.7, 70.4, 61.7 (q,  $J_{\text{C-F}} = 278.5$  Hz), 55.0, 47.9, 25.0.  $^{19}\text{F}$  NMR (282 MHz,  $\text{CDCl}_3$ )  $\delta$  -72.0; HRMS (ESI)  $m/z$  calcd for  $\text{C}_{34}\text{H}_{27}\text{F}_3\text{N}_4\text{NaO}_3$   $[\text{M}+\text{Na}]^+$ : 619.1927, found 619.1927.

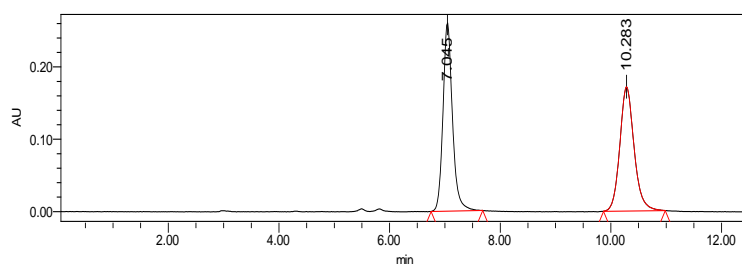

|   | Retention Time | Area    | % Area | Height | Int Type | Peak Type |
|---|----------------|---------|--------|--------|----------|-----------|
| 1 | 7.045          | 3097367 | 50.14  | 260497 | bb       | Unknown   |
| 2 | 10.283         | 3080343 | 49.86  | 171991 | bb       | Unknown   |

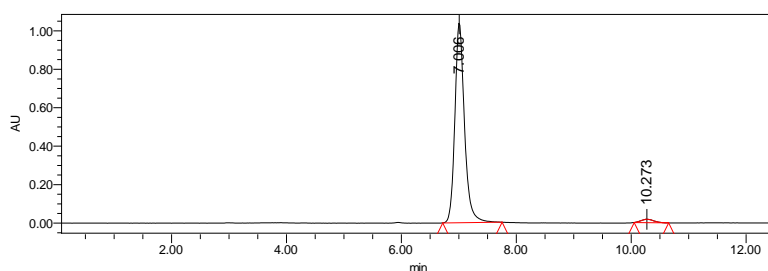

|   | Retention Time | Area     | % Area | Height  | Int Type | Peak Type |
|---|----------------|----------|--------|---------|----------|-----------|
| 1 | 7.006          | 12034419 | 97.76  | 1040309 | bb       | Unknown   |
| 2 | 10.273         | 276089   | 2.24   | 17754   | bb       | Unknown   |

**(3*S*,3'*S*,4'*R*,5'*R*)-1-methyl-4'-(naphthalen-1-yl)-1'',3''-diphenyl-5'-(trifluoromethyl)dispiro[indoline-3,2'-pyrrolidine-3',4''-pyrazole]-2,5''(1''H)-dione (3*la*)**

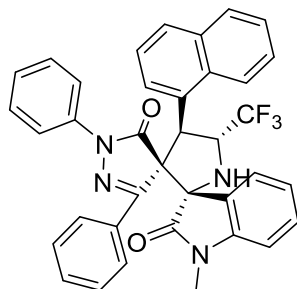

From 48.2 mg (0.20 mmol) 1-methyl-3-((2,2,2-trifluoroethyl)imino)indolin-2-one and 82.28 mg (0.22 mmol, 1.1 equiv) 4-(naphthalen-1-ylmethylene)-2,5-diphenyl-2,4-dihydro-3*H*-pyrazol-3-one, 97.5 mg (79% yield) compound **3la** was obtained as light yellow solid, mp = 208 - 209 °C.  $[\alpha]_D^{20} = -141$  ( $c = 1.0$ ,  $\text{CHCl}_3$ ). Dr (>20:1) determined by  $^1\text{H}$  and  $^{19}\text{F}$  NMR analysis. 82% ee was determined by HPLC analysis (Daicel Chiralcel IA column, hexane/2-propanol 9:1, 1.0 mL/min). Retention time:  $t_{\text{major}} = 10.3$  min and  $t_{\text{minor}} = 5.9$  min.  $^1\text{H}$  NMR (300 MHz,  $\text{CDCl}_3$ )  $\delta$  8.66 (d,  $J = 8.7$  Hz, 1H), 8.05 (d,  $J = 7.4$  Hz, 1H), 7.85 (d,  $J = 7.9$  Hz, 1H), 7.75 (t,  $J = 9.0$  Hz, 4H), 7.64 (d,  $J = 7.6$  Hz, 1H), 7.58 – 7.50 (m, 1H), 7.42 (t,  $J = 7.9$  Hz, 2H), 7.27 (ddd,  $J = 22.4, 15.3, 7.7$  Hz, 7H), 7.09 (d,  $J = 7.3$  Hz, 2H), 7.04 – 6.90 (m, 2H), 6.67 (d,  $J = 7.7$  Hz, 1H), 5.42 (d,  $J = 7.7$  Hz, 1H), 3.69 (d,  $J = 8.3$  Hz, 1H), 2.51 (s, 3H).  $^{13}\text{C}$  NMR (75 MHz,  $\text{CDCl}_3$ )  $\delta$  174.0, 171.7, 156.3, 143.9, 136.9, 134.4, 132.5, 131.2, 130.6, 130.1, 129.8, 129.3, 129.3, 129.0, 128.5, 127.8, 126.9, 126.4, 126.0, 126.0 (q,  $J_{\text{C-F}} = 278.2$  Hz), 125.4, 124.9, 124.6, 123.3, 123.0, 122.8, 120.1, 108.2, 72.4, 70.1, 63.4 (q,  $J_{\text{C-F}} = 31.0$ ), 40.6, 25.4.  $^{19}\text{F}$  NMR (282 MHz,  $\text{CDCl}_3$ )  $\delta$  -72.1; HRMS (ESI)  $m/z$  calcd for  $\text{C}_{37}\text{H}_{27}\text{F}_3\text{N}_4\text{NaO}_2$   $[\text{M}+\text{Na}]^+$ : 639.1978, found 639.1976.

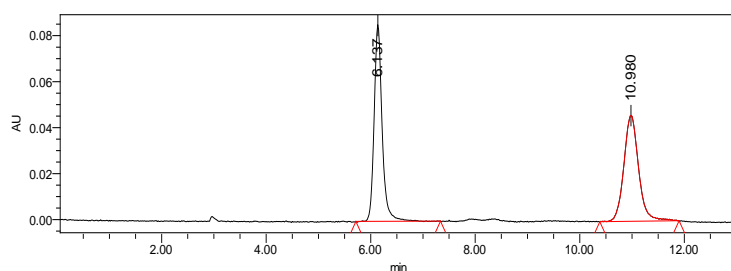

|   | Retention Time | Area   | % Area | Height | Int Type | Peak Type |
|---|----------------|--------|--------|--------|----------|-----------|
| 1 | 6.137          | 914186 | 50.38  | 85477  | bb       | Unknown   |
| 2 | 10.980         | 900496 | 49.62  | 46174  | bb       | Unknown   |

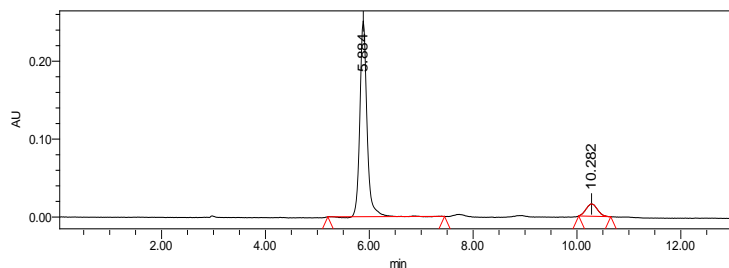

|   | Retention Time | Area    | % Area | Height | Int Type | Peak Type |
|---|----------------|---------|--------|--------|----------|-----------|
| 1 | 5.884          | 2394240 | 90.83  | 250753 | bb       | Unknown   |
| 2 | 10.282         | 241620  | 9.17   | 15859  | bb       | Unknown   |

**(3*S*,3'*S*,4'*R*,5'*R*)-1-methyl-4'-(naphthalen-2-yl)-1'',3''-diphenyl-5'-(trifluoromethyl)dispiro[indoline-3,2'-pyrrolidine-3',4''-pyrazole]-2,5''(1''*H*)-dione (3*ma*)**

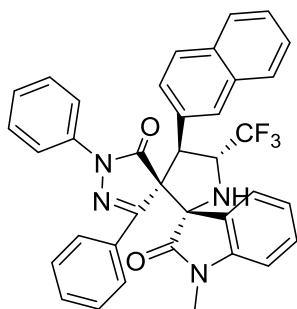

From 48.2 mg (0.20 mmol) 1-methyl-3-((2,2,2-trifluoroethyl)imino)indolin-2-one and 82.28 mg (0.22 mmol, 1.1 equiv) 4-(naphthalen-2-ylmethylene)-2,5-diphenyl-2,4-dihydro-3*H*-pyrazol-3-one, 107.4 mg (87% yield) compound **3ma** was obtained as light yellow solid, mp = 138 - 139°C.  $[\alpha]_D^{20} = +132$  ( $c = 1.0$ ,  $\text{CHCl}_3$ ). Dr (>20:1) determined by  $^1\text{H}$  and  $^{19}\text{F}$  NMR analysis. 95% ee was determined by HPLC analysis (Daicel Chiralcel IA column, hexane/2-propanol 9:1, 1.0 mL/min). Retention time:  $t_{\text{major}} = 10.7$  min and  $t_{\text{minor}} = 7.4$  min.  $^1\text{H}$  NMR (300 MHz,  $\text{CDCl}_3$ )  $\delta$  8.00 (s, 1H), 7.69 - 7.58 (m, 4H), 7.51 (dd,  $J = 6.7, 3.0$  Hz, 2H), 7.43 (dd,  $J = 7.6, 1.1$  Hz, 3H), 7.35 (dd,  $J = 7.1, 3.0$  Hz, 3H), 7.33 - 7.25 (m, 2H), 7.21 - 7.11 (m, 3H), 7.04 (t,  $J = 7.4$  Hz, 1H), 6.88 - 6.68 (m, 1H), 6.49 (d,  $J = 7.7$  Hz, 1H), 5.90 (d,  $J = 10.1$  Hz, 1H), 5.53 (td,  $J = 9.8, 4.9$  Hz, 1H), 3.51 (d,  $J = 9.8$  Hz, 1H), 2.27 (s, 3H).  $^{13}\text{C}$  NMR (75 MHz,  $\text{CDCl}_3$ )  $\delta$  174.0, 171.7, 156.3, 143.9, 136.9, 134.4, 132.5, 131.2, 130.6, 130.1, 129.8, 129.3, 129.3, 129.0, 128.5, 127.8, 126.9, 126.4, 126.0, 126.0 (q,  $J_{\text{C-F}} = 278.3$  Hz), 125.4, 124.9, 124.6, 123.3, 123.0, 122.8, 120.1, 108.2, 72.4, 70.1, 63.4 (q,  $J_{\text{C-F}} = 30.2$  Hz), 40.6, 25.4.  $^{19}\text{F}$  NMR (282 MHz,  $\text{CDCl}_3$ )  $\delta$  -71.8; HRMS (ESI)  $m/z$  calcd for  $\text{C}_{37}\text{H}_{27}\text{F}_3\text{N}_4\text{NaO}_2$   $[\text{M}+\text{Na}]^+$ : 639.1978, found 639.1976.

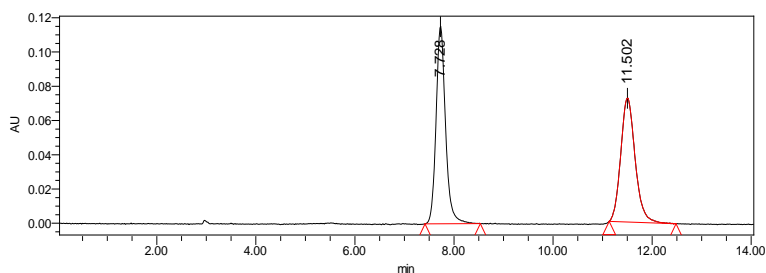

|   | Retention Time | Area    | % Area | Height | Int Type | Peak Type |
|---|----------------|---------|--------|--------|----------|-----------|
| 1 | 7.728          | 1534705 | 51.21  | 115487 | bb       | Unknown   |
| 2 | 11.502         | 1462219 | 48.79  | 72431  | bb       | Unknown   |

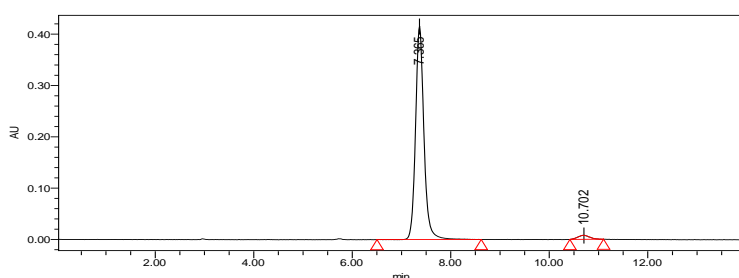

|   | Retention Time | Area    | % Area | Height | Int Type | Peak Type |
|---|----------------|---------|--------|--------|----------|-----------|
| 1 | 7.365          | 4916437 | 97.43  | 415790 | bb       | Unknown   |
| 2 | 10.702         | 129844  | 2.57   | 7771   | bb       | Unknown   |

**(3*S*,3'*S*,4'*R*,5'*R*)-1''-(4-chlorophenyl)-1-methyl-3'',4'-diphenyl-5''-(trifluoromethyl)dispiro[indoline-3,2'-pyrrolidine-3',4''-pyrazole]-2,5''(1''H)-dione (3na)**

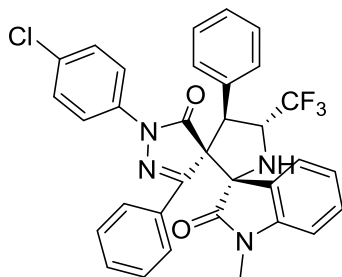

From 48.2 mg (0.20 mmol) 1-methyl-3-((2,2,2-trifluoroethyl)imino)indolin-2-one and 78.98 mg (0.22 mmol, 1.1 equiv) 4-benzylidene-2-(4-chlorophenyl)-5-phenyl-2,4-dihydro-3H-pyrazol-3-one, 105.8 mg (88% yield) compound **3na** was obtained as light yellow solid, mp = 196 - 197 °C.  $[\alpha]_D^{20} = +174$  ( $c = 1.0$ ,  $\text{CHCl}_3$ ). Dr (>20:1) determined by  $^1\text{H}$  and  $^{19}\text{F}$  NMR analysis. 94% ee was determined by HPLC analysis (Daicel Chiralcel IA column, hexane/2-propanol 9:1, 1.0 mL/min). Retention time:  $t_{\text{major}} = 11.6$  min and  $t_{\text{minor}} = 9.1$  min.  $^1\text{H}$  NMR (300 MHz,  $\text{CDCl}_3$ )  $\delta$  7.60 – 7.43 (m, 10H), 7.30 – 7.22 (m, 6H), 6.90 (td,  $J = 7.7, 0.7$  Hz, 1H), 6.61 (d,  $J = 7.7$  Hz, 1H), 5.80 (d,  $J = 10.1$  Hz, 1H), 5.49 (dd,  $J = 15.3, 7.7$  Hz, 1H), 3.52 (d,  $J = 8.5$  Hz, 1H), 2.35 (s, 3H).  $^{13}\text{C}$  NMR (100 MHz,  $\text{CDCl}_3$ )  $\delta$  173.8, 170.6, 155.3, 143.8, 135.2, 132.7,



131.4, 131.1, 130.8, 130.5, 130.2, 129.0, 128.8, 128.6, 128.4, 128.1, 126.0 (q,  $J_{C-F} = 278.3$  Hz), 124.3, 122.9, 122.9, 120.9, 108.2, 73.0, 70.5, 61.6 (q,  $J_{C-F} = 30.7$  Hz), 48.0, 25.0.  $^{19}\text{F}$  NMR (282 MHz,  $\text{CDCl}_3$ )  $\delta$  -72.1; HRMS (ESI)  $m/z$  calcd for  $\text{C}_{33}\text{H}_{24}\text{ClF}_3\text{N}_4\text{NaO}_2$   $[\text{M}+\text{Na}]^+$ : 623.1432, found 623.1436.

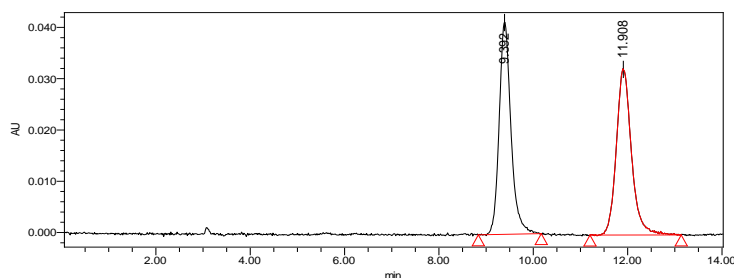

|   | Retention Time | Area   | % Area | Height | Int Type | Peak Type |
|---|----------------|--------|--------|--------|----------|-----------|
| 1 | 9.392          | 719199 | 49.86  | 41375  | bb       | Unknown   |
| 2 | 11.908         | 723304 | 50.14  | 32352  | bb       | Unknown   |

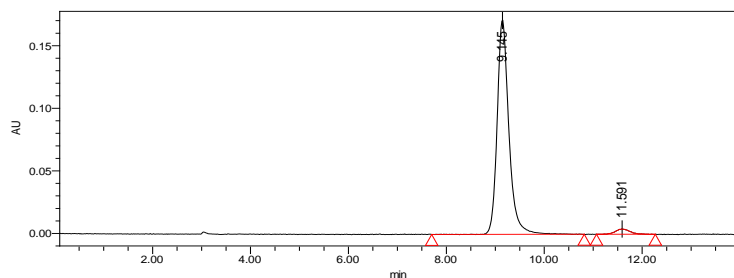

|   | Retention Time | Area    | % Area | Height | Int Type | Peak Type |
|---|----------------|---------|--------|--------|----------|-----------|
| 1 | 9.145          | 2850817 | 97.04  | 171192 | bb       | Unknown   |
| 2 | 11.591         | 87030   | 2.96   | 4208   | bb       | Unknown   |

**(3*S*,3'*S*,4'*R*,5'*R*)-1''-(4-bromophenyl)-1-methyl-3'',4'-diphenyl-5'-(trifluoromethyl)dispiro[indoline-3,2'-pyrrolidine-3',4''-pyrazole]-2,5''(1''H)-dione (3*o*a)**

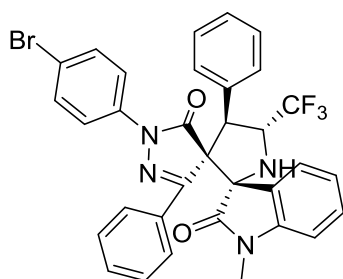

From 48.2 mg (0.20 mmol) 1-methyl-3-((2,2,2-trifluoroethyl)imino)indolin-2-one and 88.66 mg (0.22 mmol, 1.1 equiv) 4-benzylidene-2-(4-bromophenyl)-5-phenyl-2,4-dihydro-3*H*-pyrazol-3-one, 112.2 mg (87% yield) compound **3o a** was obtained as light yellow solid, mp = 179 - 180°C.  $[\alpha]_D^{20} = +162$  ( $c = 1.0$ ,  $\text{CHCl}_3$ ). Dr (>20:1) determined by  $^1\text{H}$  and  $^{19}\text{F}$  NMR analysis. 94% ee was determined by HPLC analysis (Daicel Chiralcel IA column, hexane/2-propanol 9:1, 1.0 mL/min). Retention time:  $t_{\text{major}} = 11.1$  min and  $t_{\text{minor}} = 9.0$  min.  $^1\text{H}$  NMR (300 MHz,  $\text{CDCl}_3$ )  $\delta$  7.61 - 7.52 (m,

4H), 7.46 (dddd,  $J = 11.5, 9.1, 6.5, 2.2$  Hz, 8H), 7.31 – 7.17 (m, 4H), 6.89 (td,  $J = 7.7, 0.7$  Hz, 1H), 6.60 (d,  $J = 7.7$  Hz, 1H), 5.80 (d,  $J = 10.1$  Hz, 1H), 5.59 – 5.36 (m, 1H), 3.52 (d,  $J = 9.8$  Hz, 1H), 2.35 (s, 3H).  $^{13}\text{C}$  NMR (75 MHz,  $\text{CDCl}_3$ )  $\delta$  173.8, 170.6, 155.3, 143.8, 135.7, 132.7, 131.9, 131.1, 130.8, 130.6, 129.0, 128.8, 128.6, 128.4, 128.1, 126.0 (q,  $J_{\text{C-F}} = 278.2$  Hz), 124.2, 122.9, 121.1, 120.0, 119.2, 108.2, 73.1, 70.5, 61.6 (q,  $J_{\text{C-F}} = 30.8$  Hz), 48.0, 25.0.  $^{19}\text{F}$  NMR (282 MHz,  $\text{CDCl}_3$ )  $\delta$  -72.1; HRMS (ESI)  $m/z$  calcd for  $\text{C}_{33}\text{H}_{24}\text{BrF}_3\text{N}_4\text{NaO}_2$   $[\text{M}+\text{Na}]^+$ : 667.0927, found 667.0931.

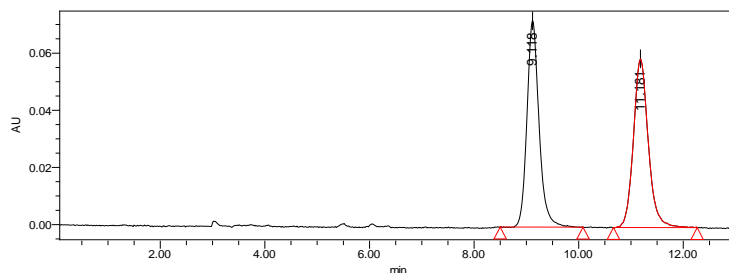

|   | Retention Time | Area    | % Area | Height | Int Type | Peak Type |
|---|----------------|---------|--------|--------|----------|-----------|
| 1 | 9.118          | 1162959 | 49.95  | 72328  | bb       | Unknown   |
| 2 | 11.181         | 1165065 | 50.05  | 58947  | bb       | Unknown   |

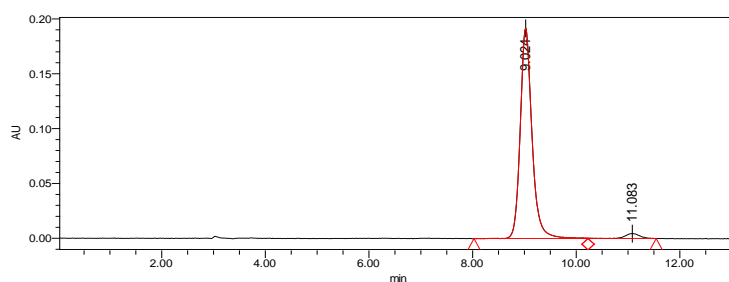

|   | Retention Time | Area    | % Area | Height | Int Type | Peak Type |
|---|----------------|---------|--------|--------|----------|-----------|
| 1 | 9.024          | 3032687 | 97.09  | 191874 | bv       | Unknown   |
| 2 | 11.083         | 90868   | 2.91   | 4466   | vb       | Unknown   |

**(3*S*,3'*S*,4*R*,5*R*)-1-methyl-3'',4'-diphenyl-1''-(*p*-tolyl)-5''-(trifluoromethyl)dispiro [indoline-3,2'-pyrrolidine-3',4''-pyrazole]-2,5''(1''H)-dione (3pa)**

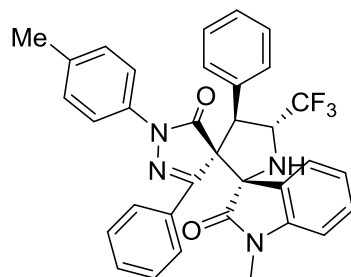

From 48.2 mg (0.20 mmol) 1-methyl-3-((2,2,2-trifluoroethyl)imino)indolin-2-one and 74.36 mg (0.22 mmol, 1.1 equiv) 4-benzylidene-5-phenyl-2-(*p*-tolyl) -2,4-dihydro-3*H*-pyrazol-3-one, 103.4 mg (89% yield) compound **3pa** was obtained as light yellow

solid, mp = 180 - 181 °C.  $[\alpha]_D^{20} = + 162$  ( $c = 1.0$ ,  $\text{CHCl}_3$ ). Dr (>20:1) determined by  $^1\text{H}$  and  $^{19}\text{F}$  NMR analysis. 96% ee was determined by HPLC analysis (Daicel Chiralcel IA column, hexane/2-propanol 9:1, 1.0 mL/min). Retention time:  $t_{\text{major}} = 11.0$  min and  $t_{\text{minor}} = 8.4$  min.  $^1\text{H}$  NMR (300 MHz,  $\text{CDCl}_3$ )  $\delta$  7.57 (dd,  $J = 11.0, 5.5$  Hz, 4H), 7.50 (d,  $J = 7.3$  Hz, 1H), 7.47 – 7.33 (m, 5H), 7.30 – 7.19 (m, 4H), 7.12 (d,  $J = 8.3$  Hz, 2H), 6.91 (t,  $J = 7.4$  Hz, 1H), 6.59 (d,  $J = 7.8$  Hz, 1H), 5.80 (d,  $J = 10.1$  Hz, 1H), 5.63 – 5.36 (m, 1H), 3.54 (d,  $J = 9.9$  Hz, 1H), 2.34 (s, 3H), 2.30 (s, 3H).  $^{13}\text{C}$  NMR (100MHz,  $\text{CDCl}_3$ )  $\delta$  174.0, 170.6, 154.8, 143.8, 136.2, 134.2, 132.9, 131.07, 131.0, 130.3, 129.4, 128.9, 128.8, 128.5, 128.5, 128.1, 126.1 (q,  $J_{\text{C-F}} = 279.0$  Hz), 124.5, 123.1, 122.9, 120.4, 108.1, 72.8, 70.5, 61.6 (q,  $J_{\text{C-F}} = 30.7$  Hz), 48.0, 25.0, 21.0.  $^{19}\text{F}$  NMR (282 MHz,  $\text{CDCl}_3$ )  $\delta$  -72.0; HRMS (ESI)  $m/z$  calcd for  $\text{C}_{34}\text{H}_{27}\text{F}_3\text{N}_4\text{NaO}_2$   $[\text{M}+\text{Na}]^+$ : 603.1978, found 603.1983.

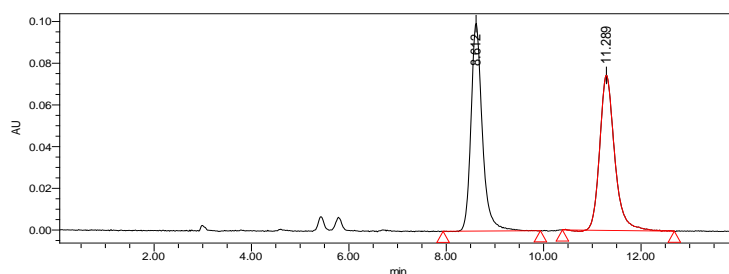

|   | Retention Time | Area    | % Area | Height | Int Type | Peak Type |
|---|----------------|---------|--------|--------|----------|-----------|
| 1 | 8.612          | 1607740 | 50.19  | 99613  | bb       | Unknown   |
| 2 | 11.289         | 1595477 | 49.81  | 74512  | bb       | Unknown   |

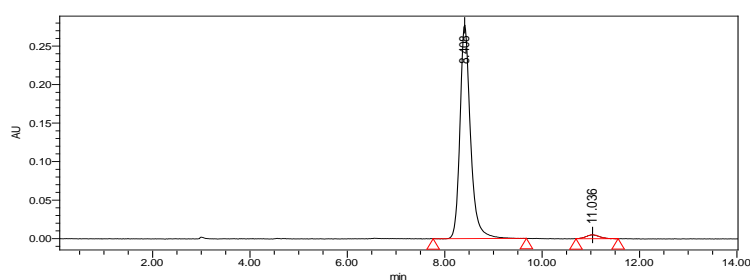

|   | Retention Time | Area    | % Area | Height | Int Type | Peak Type |
|---|----------------|---------|--------|--------|----------|-----------|
| 1 | 8.408          | 4166262 | 97.74  | 277532 | bb       | Unknown   |
| 2 | 11.036         | 96219   | 2.26   | 4980   | bb       | Unknown   |

**(3S,3'S,4'R,5'R)-1''-(3-chlorophenyl)-1-methyl-3'',4'-diphenyl-5''-(trifluoromethyl)dispiro[indoline-3,2'-pyrrolidine-3',4''-pyrazole]-2,5''(1''H)-dione (3qa)**

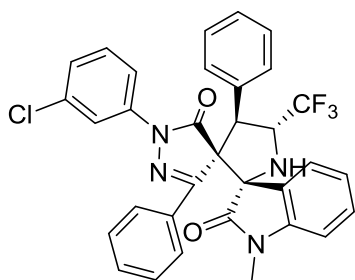

From 48.2 mg (0.20 mmol) 1-methyl-3-((2,2,2-trifluoroethyl)imino)indolin-2-one and 78.98 mg (0.22 mmol, 1.1 equiv) 4-benzylidene-2-(3-chlorophenyl)-5-phenyl-2,4-dihydro-3H-pyrazol-3-one, 99.8 mg (83% yield) compound **3qa** was obtained as light yellow solid, mp = 98 - 99 °C.  $[\alpha]_D^{20} = +186$  ( $c = 1.0$ ,  $\text{CHCl}_3$ ). Dr (>20:1) determined by  $^1\text{H}$  and  $^{19}\text{F}$  NMR analysis. 88% ee was determined by HPLC analysis (Daicel Chiralcel IA column, hexane/2-propanol 9:1, 1.0 mL/min). Retention time:  $t_{\text{major}} = 9.6$  min and  $t_{\text{minor}} = 6.9$  min.  $^1\text{H}$  NMR (300 MHz,  $\text{CDCl}_3$ )  $\delta$  7.58 (dd,  $J = 9.7, 5.2$  Hz, 4H), 7.51 (d,  $J = 7.6$  Hz, 1H), 7.44 (dd,  $J = 5.1, 1.6$  Hz, 3H), 7.36 (d,  $J = 8.1$  Hz, 1H), 7.32 – 7.16 (m, 7H), 7.03 – 6.87 (m, 2H), 6.59 (d,  $J = 7.7$  Hz, 1H), 5.81 (dd,  $J = 10.1, 2.1$  Hz, 1H), 5.59 – 5.43 (m, 1H), 3.54 (dd,  $J = 9.8, 2.7$  Hz, 1H), 2.32 (d,  $J = 14.0$  Hz, 6H).  $^{13}\text{C}$  NMR (100 MHz,  $\text{CDCl}_3$ )  $\delta$  173.8, 170.7, 155.4, 143.8, 137.8, 132.7, 131.2, 130.8, 130.6, 130.2, 129.0, 128.9, 128.8, 128.6, 128.4, 128.1, 126.0 (q,  $J_{\text{C-F}} = 278.7$  Hz), 124.3, 122.9, 122.9, 122.5, 122.4, 117.9, 108.2, 73.2, 70.6, 61.6 (q,  $J_{\text{C-F}} = 30.7$  Hz), 48.0, 25.0.  $^{19}\text{F}$  NMR (282 MHz,  $\text{CDCl}_3$ )  $\delta$  -72.0; HRMS (ESI)  $m/z$  calcd for  $\text{C}_{33}\text{H}_{24}\text{ClF}_3\text{N}_4\text{NaO}_2$   $[\text{M}+\text{Na}]^+$ : 623.1432, found 623.1436.

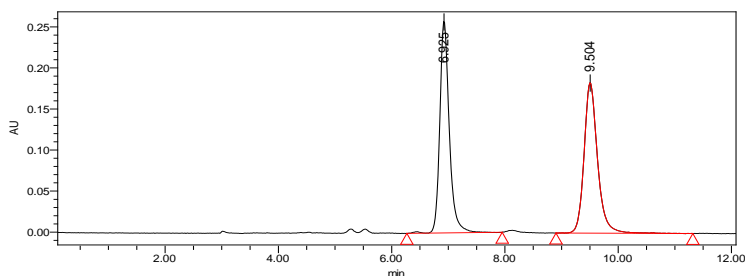

|   | Retention Time | Area    | % Area | Height | Int Type | Peak Type |
|---|----------------|---------|--------|--------|----------|-----------|
| 1 | 6.925          | 3014720 | 49.90  | 258763 | bb       | Unknown   |
| 2 | 9.504          | 3026999 | 50.10  | 183416 | bb       | Unknown   |

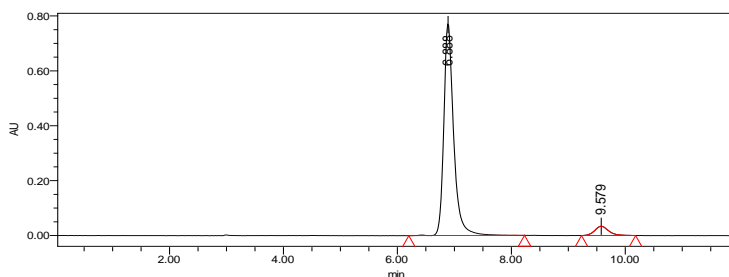

|   | Retention Time | Area    | % Area | Height | Int Type | Peak Type |
|---|----------------|---------|--------|--------|----------|-----------|
| 1 | 6.888          | 9258896 | 94.23  | 773920 | bb       | Unknown   |
| 2 | 9.579          | 567189  | 5.77   | 33817  | bb       | Unknown   |

**(3*S*,3'*S*,4'*R*,5'*R*)-1''-(3-bromophenyl)-1-methyl-3'',4'-diphenyl-5'-(trifluoromethyl)dispiro[indoline-3,2'-pyrrolidine-3',4''-pyrazole]-2,5''(1''*H*)-dione (3*ra*)**

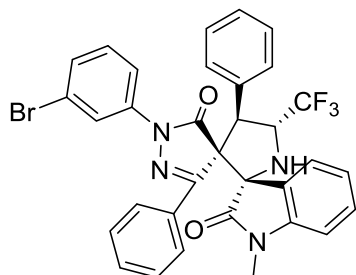

From 48.2 mg (0.20 mmol) 1-methyl-3-((2,2,2-trifluoroethyl)imino)indolin-2-one and 88.66 mg (0.22 mmol, 1.1 equiv) 4-benzylidene-2-(3-bromophenyl)-5-phenyl-2,4-dihydro-3*H*-pyrazol-3-one, 104.3 mg (81% yield) compound **3ra** was obtained as light yellow solid, mp = 109 - 110 °C.  $[\alpha]_D^{20} = +280$  ( $c = 1.0$ ,  $\text{CHCl}_3$ ). Dr (>20:1) determined by  $^1\text{H}$  and  $^{19}\text{F}$  NMR analysis. 88% ee was determined by HPLC analysis (Daicel Chiralcel IA column, hexane/2-propanol 9:1, 1.0 mL/min). Retention time:  $t_{\text{major}} = 10.0$  min and  $t_{\text{minor}} = 7.1$  min.  $^1\text{H}$  NMR (300 MHz,  $\text{CDCl}_3$ )  $\delta$  7.58 (dd,  $J = 9.7, 5.2$  Hz, 4H), 7.51 (d,  $J = 7.6$  Hz, 1H), 7.44 (dd,  $J = 5.1, 1.6$  Hz, 3H), 7.36 (d,  $J = 8.1$  Hz, 1H), 7.32 – 7.16 (m, 7H), 7.03 – 6.87 (m, 2H), 6.59 (d,  $J = 7.7$  Hz, 1H), 5.81 (dd,  $J = 10.1, 2.1$  Hz, 1H), 5.59 – 5.43 (m, 1H), 3.54 (dd,  $J = 9.8, 2.7$  Hz, 1H), 2.32 (d,  $J = 14.0$  Hz, 6H).  $^{13}\text{C}$  NMR (100 MHz,  $\text{CDCl}_3$ )  $\delta$  173.8, 170.7, 155.4, 143.8, 137.7, 134.6, 132.7, 131.2, 130.8, 130.6, 129.9, 129.0, 128.8, 128.6, 128.4, 128.1, 126.0, 126.0 (q,  $J_{\text{C-F}} = 278.7$  Hz), 124.3, 122.9, 122.9, 119.5, 117.4, 108.2, 73.2, 70.6, 61.6 (q,  $J_{\text{C-F}} = 30.7$  Hz), 48.0, 25.0.  $^{19}\text{F}$  NMR (282 MHz,  $\text{CDCl}_3$ )  $\delta$  -72.0; HRMS (ESI)  $m/z$  calcd for  $\text{C}_{33}\text{H}_{24}\text{BrF}_3\text{N}_4\text{NaO}_2$   $[\text{M}+\text{Na}]^+$ : 667.0927, found 667.0931.

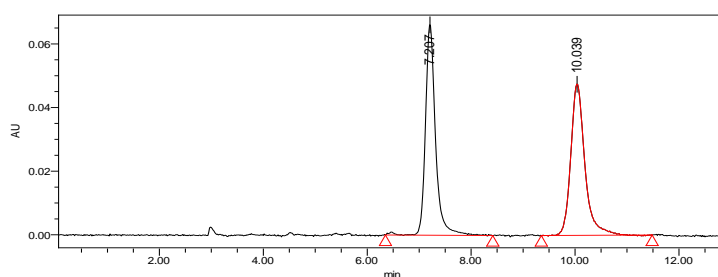

|   | Retention Time | Area   | % Area | Height | Int Type | Peak Type |
|---|----------------|--------|--------|--------|----------|-----------|
| 1 | 7.207          | 897300 | 49.99  | 66456  | bb       | Unknown   |
| 2 | 10.039         | 897813 | 50.01  | 47627  | bb       | Unknown   |

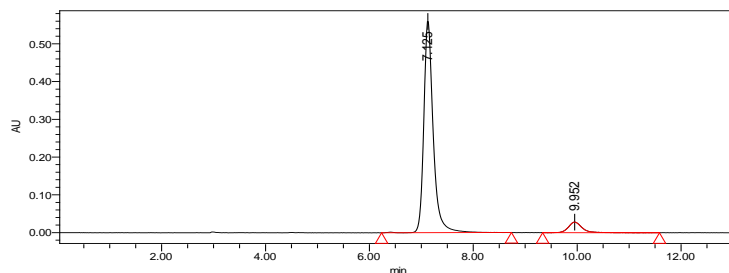

|   | Retention Time | Area    | % Area | Height | Int Type | Peak Type |
|---|----------------|---------|--------|--------|----------|-----------|
| 1 | 7.125          | 7044652 | 93.17  | 563053 | bb       | Unknown   |
| 2 | 9.952          | 516759  | 6.83   | 28052  | bb       | Unknown   |

**(3*S*,3'*S*,4'*R*,5'*R*)-1-methyl-3'',4'-diphenyl-1''-(*m*-tolyl)-5'-(trifluoromethyl)dispiro [indoline-3,2'-pyrrolidine-3',4''-pyrazole]-2,5''(1''H)-dione**

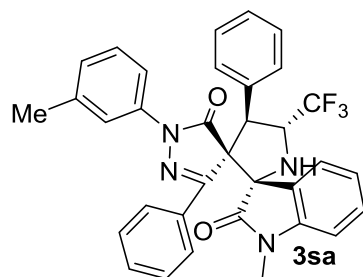

From 48.2 mg (0.20 mmol) 1-methyl-3-((2,2,2-trifluoroethyl)imino)indolin-2-one and 74.36 mg (0.22 mmol, 1.1 equiv) 4-benzylidene-5-phenyl-2-(*m*-tolyl)-2,4-dihydro-3*H*-pyrazol-3-one, 101.1 mg (87% yield) compound **3sa** was obtained as light yellow solid, mp = 99 - 100 °C.  $[\alpha]_D^{20} = +129$  ( $c = 1.0$ , CHCl<sub>3</sub>). Dr (>20:1) determined by <sup>1</sup>H and <sup>19</sup>F NMR analysis. 92% ee was determined by HPLC analysis (Daicel Chiralcel IA column, hexane/2-propanol 9:1, 1.0 mL/min). Retention time:  $t_{\text{major}} = 9.2$  min and  $t_{\text{minor}} = 6.6$  min. <sup>1</sup>H NMR (300 MHz, CDCl<sub>3</sub>)  $\delta$  7.58 (dd,  $J = 9.7, 5.2$  Hz, 4H), 7.51 (d,  $J = 7.6$  Hz, 1H), 7.44 (dd,  $J = 5.1, 1.6$  Hz, 3H), 7.36 (d,  $J = 8.1$  Hz, 1H), 7.32 – 7.16 (m, 7H), 7.03 – 6.87 (m, 2H), 6.59 (d,  $J = 7.7$  Hz, 1H), 5.81 (dd,  $J = 10.1, 2.1$  Hz, 1H), 5.59 – 5.43 (m, 1H), 3.54 (dd,  $J = 9.8, 2.7$  Hz, 1H), 2.32 (d,  $J = 14.0$  Hz, 6H). <sup>13</sup>C NMR (100 MHz, CDCl<sub>3</sub>)  $\delta$  173.9, 170.7, 154.9, 143.8, 138.8, 136.6, 132.9, 131.0, 130.4, 128.9, 128.8, 128.7, 128.5, 128.5, 128.1, 127.1, 126.6 (q,  $J_{\text{C-F}} = 278.3$  Hz), 124.5, 123.1, 122.9, 120.8, 117.4, 108.1, 72.85, 70.48, 61.6 (q,  $J_{\text{C-F}} = 30.7$  Hz), 48.00, 25.02, 21.50. <sup>19</sup>F NMR (282 MHz, CDCl<sub>3</sub>)  $\delta$  -72.0; HRMS (ESI)  $m/z$  calcd for C<sub>34</sub>H<sub>27</sub>F<sub>3</sub>N<sub>4</sub>NaO<sub>2</sub> [M+Na]<sup>+</sup>: 603.1978, found 603.1981.

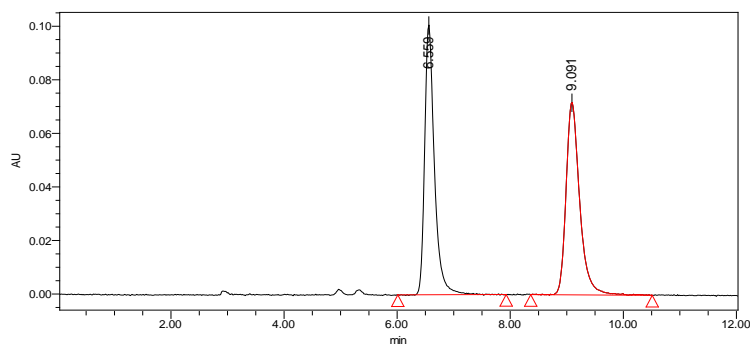

|   | Retention Time | Area    | % Area | Height | Int Type | Peak Type |
|---|----------------|---------|--------|--------|----------|-----------|
| 1 | 6.559          | 1211434 | 50.14  | 100662 | bb       | Unknown   |
| 2 | 9.091          | 1204475 | 49.86  | 71882  | bb       | Unknown   |

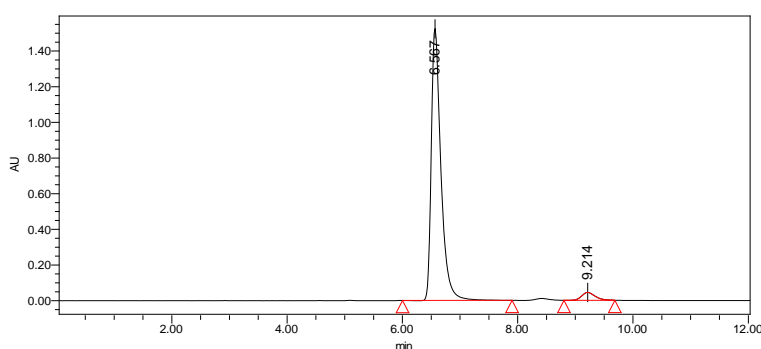

|   | Retention Time | Area     | % Area | Height  | Int Type | Peak Type |
|---|----------------|----------|--------|---------|----------|-----------|
| 1 | 6.567          | 17666723 | 96.13  | 1524854 | bb       | Unknown   |
| 2 | 9.214          | 711388   | 3.87   | 44091   | bb       | Unknown   |

**(3*S*,3'*S*,4'*R*,5'*R*)-3''-(4-bromophenyl)-1-methyl-1'',4'-diphenyl-5'-(trifluoromethyl)dispiro[indoline-3,2'-pyrrolidine-3',4''-pyrazole]-2,5''(1''H)-dione (3ta)**

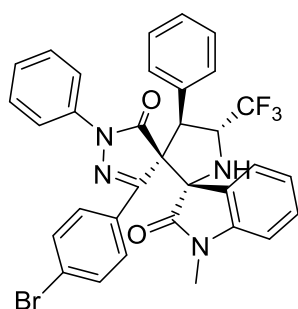

From 48.2 mg (0.20 mmol) 1-methyl-3-((2,2,2-trifluoroethyl)imino)indolin-2-one and 88.66 mg (0.22 mmol, 1.1 equiv) 4-benzylidene-5-(4-bromophenyl)-2-phenyl-2,4-dihydro-3*H*-pyrazol-3-one, 110.9 mg (86% yield) compound **3ta** was obtained as light yellow solid, mp = 108 - 109 °C.  $[\alpha]_D^{20} = +130$  ( $c = 1.0$ ,  $\text{CHCl}_3$ ). Dr (>20:1) determined by  $^1\text{H}$  and  $^{19}\text{F}$  NMR analysis. 93% ee was determined by HPLC analysis (Daicel Chiralcel IA column, hexane/2-propanol 9:1, 1.0 mL/min). Retention time:  $t_{\text{major}} = 10.0$  min and  $t_{\text{minor}} = 7.5$  min.  $^1\text{H}$  NMR (300 MHz,  $\text{CDCl}_3$ )  $\delta$  7.44 (ddd,  $J = 12.8, 11.4, 6.9$  Hz, 9H), 7.25 - 7.04 (m, 7H), 6.82 (t,  $J = 7.6$  Hz, 1H), 6.53 (d,  $J = 7.8$  Hz,

1H), 5.66 (d,  $J = 10.0$  Hz, 1H), 5.50 – 5.31 (m, 1H), 3.45 (d,  $J = 9.7$  Hz, 1H), 2.36 (s, 3H).  $^{13}\text{C}$  NMR (100 MHz,  $\text{CDCl}_3$ )  $\delta$  173.0, 169.5, 152.7, 142.6, 135.4, 131.6, 130.2, 130.1, 129.14, 128.8, 128.0, 127.8, 127.6, 127.4, 125.3, 125.0 (q,  $J_{\text{C-F}} = 278.7$  Hz), 123.9, 123.4, 122.0, 121.9, 119.1, 107.2, 71.7, 69.5, 60.5 (q,  $J_{\text{C-F}} = 30.3$  Hz), 47.0, 24.1.  $^{19}\text{F}$  NMR (282 MHz,  $\text{CDCl}_3$ )  $\delta$  -72.2; HRMS (ESI)  $m/z$  calcd for  $\text{C}_{33}\text{H}_{24}\text{BrF}_3\text{N}_4\text{NaO}_2$   $[\text{M}+\text{Na}]^+$ : 667.0927, found 667.0932.

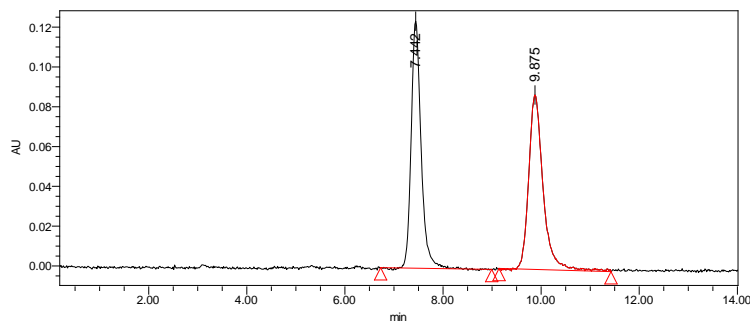

|   | Retention Time | Area    | % Area | Height | Int Type | Peak Type |
|---|----------------|---------|--------|--------|----------|-----------|
| 1 | 7.442          | 1762451 | 49.47  | 124305 | bb       | Unknown   |
| 2 | 9.875          | 1800124 | 50.53  | 87697  | bb       | Unknown   |

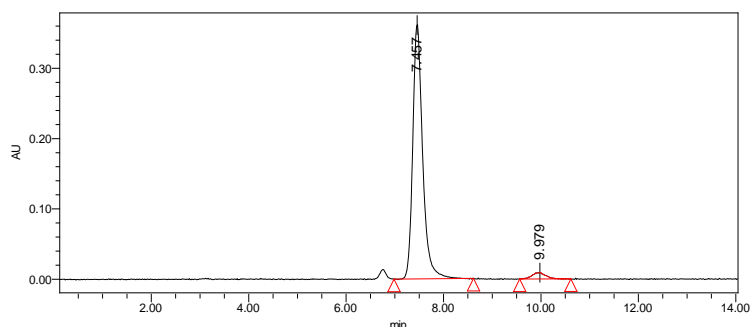

|   | Retention Time | Area    | % Area | Height | Int Type | Peak Type |
|---|----------------|---------|--------|--------|----------|-----------|
| 1 | 7.457          | 5120281 | 96.55  | 362633 | bb       | Unknown   |
| 2 | 9.979          | 182817  | 3.45   | 8980   | bb       | Unknown   |

**(3S,3'S,4'R,5'R)-3''-(4-methoxyphenyl)-1-methyl-1'',4'-diphenyl-5'-(trifluoromethyl)dispiro[indoline-3,2'-pyrrolidine-3',4''-pyrazole]-2,5''(1''H)-dione (3ua)**

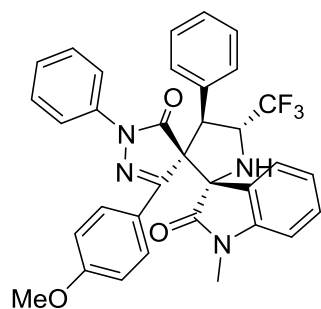



From 48.2 mg (0.20 mmol) 1-methyl-3-((2,2,2-trifluoroethyl)imino)indolin-2-one and 77.88 mg (0.22 mmol, 1.1 equiv) 4-benzylidene-5-(4-methoxyphenyl)-2-phenyl-2,4-dihydro-3H-pyrazol-3-one, 106.3 mg (89% yield) compound **3ua** was obtained as light yellow solid, mp = 209 - 210 °C.  $[\alpha]_D^{20} = +161$  ( $c = 1.0$ ,  $\text{CHCl}_3$ ). Dr (>20:1) determined by  $^1\text{H}$  and  $^{19}\text{F}$  NMR analysis. 94% ee was determined by HPLC analysis (Daicel Chiralcel IA column, hexane/2-propanol 9:1, 1.0 mL/min). Retention time:  $t_{\text{major}} = 12.4$  min and  $t_{\text{minor}} = 8.0$  min.  $^1\text{H}$  NMR (300 MHz,  $\text{CDCl}_3$ )  $\delta$  7.60 – 7.47 (m, 7H), 7.38 – 7.27 (m, 3H), 7.26 – 7.14 (m, 4H), 7.00 – 6.87 (m, 3H), 6.61 (d,  $J = 7.8$  Hz, 1H), 5.76 (d,  $J = 10.1$  Hz, 1H), 5.59 – 5.44 (m, 1H), 3.86 (s, 3H), 3.54 (d,  $J = 9.9$  Hz, 1H), 2.44 (s, 3H).  $^{13}\text{C}$  NMR (100 MHz,  $\text{CDCl}_3$ )  $\delta$  173.1, 169.5, 160.3, 153.4, 142.7, 135.7, 131.9, 129.9, 129.3, 127.8, 127.7, 127.4, 127.4, 127.4, 125.1 (q,  $J_{\text{C-F}} = 279.0$  Hz), 123.4, 122.4, 122.0, 121.8, 119.0, 112.4, 107.0, 71.9, 69.6, 60.5 (q,  $J_{\text{C-F}} = 30.3$  Hz), 54.4, 46.8, 24.2.  $^{19}\text{F}$  NMR (282 MHz,  $\text{CDCl}_3$ )  $\delta$  -72.1; HRMS (ESI)  $m/z$  calcd for  $\text{C}_{34}\text{H}_{27}\text{F}_3\text{N}_4\text{NaO}_3$   $[\text{M}+\text{Na}]^+$ : 619.1927, found 619.1935.

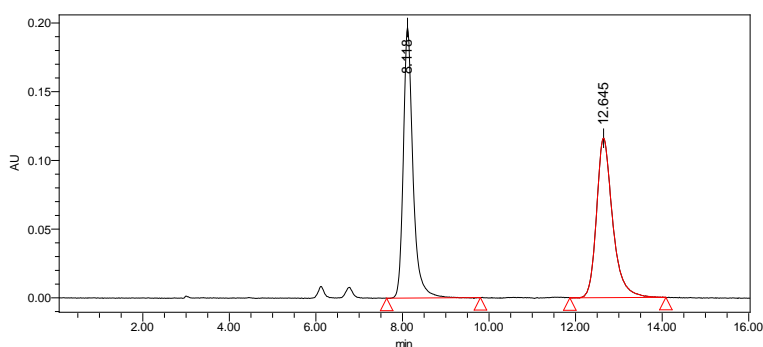

|   | Retention Time | Area    | % Area | Height | Int Type | Peak Type |
|---|----------------|---------|--------|--------|----------|-----------|
| 1 | 8.118          | 3046632 | 50.40  | 196838 | bb       | Unknown   |
| 2 | 12.645         | 2998435 | 49.60  | 116185 | bb       | Unknown   |

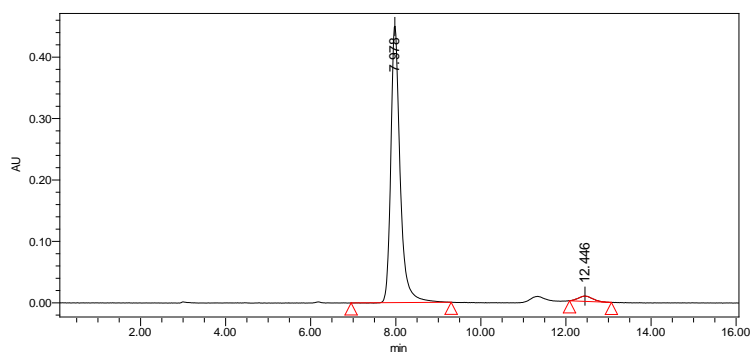

|   | Retention Time | Area    | % Area | Height | Int Type | Peak Type |
|---|----------------|---------|--------|--------|----------|-----------|
| 1 | 7.978          | 6836531 | 97.16  | 450847 | bb       | Unknown   |
| 2 | 12.446         | 199729  | 2.84   | 8603   | bb       | Unknown   |

**(3*S*,3'*S*,4'*R*,5'*R*)-1-methyl-1'',4'-diphenyl-3''-(*o*-tolyl)-5''-(trifluoromethyl)dispiro[indoline-3,2'-pyrrolidine-3',4''-pyrazole]-2,5''(1''*H*)-dione (3*va*)**

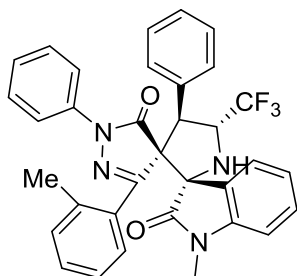

From 48.2 mg (0.20 mmol) 1-methyl-3-((2,2,2-trifluoroethyl)imino)indolin-2-one and 74.36 mg (0.22 mmol, 1.1 equiv) 4-benzylidene-2-phenyl-5-(*o*-tolyl)-2,4-dihydro-3*H*-pyrazol-3-one, 102.1 mg (88% yield) compound **3va** was obtained as light yellow solid, mp = 186 - 188 °C.  $[\alpha]_D^{20} = +174$  ( $c = 1.0$ ,  $\text{CHCl}_3$ ). Dr (>20:1) determined by  $^1\text{H}$  and  $^{19}\text{F}$  NMR analysis. 95% ee was determined by HPLC analysis (Daicel Chiralcel IA column, hexane/2-propanol 9:1, 1.0 mL/min). Retention time:  $t_{\text{major}} = 8.8$  min and  $t_{\text{minor}} = 6.7$  min.  $^1\text{H}$  NMR (300 MHz,  $\text{CDCl}_3$ )  $\delta$  7.74 (d,  $J = 7.5$  Hz, 1H), 7.65 (d,  $J = 7.4$  Hz, 2H), 7.57 (d,  $J = 7.9$  Hz, 3H), 7.33 (dt,  $J = 21.8, 7.2$  Hz, 8H), 7.26 – 7.16 (m, 4H), 6.93 (t,  $J = 7.6$  Hz, 1H), 6.63 (d,  $J = 7.8$  Hz, 1H), 5.85 (d,  $J = 10.1$  Hz, 1H), 5.52 – 5.26 (m, 1H), 3.51 (d,  $J = 9.9$  Hz, 1H), 2.46 (s, 3H), 1.74 (s, 3H).  $^{13}\text{C}$  NMR (100 MHz,  $\text{CDCl}_3$ )  $\delta$  173.5, 170.6, 154.3, 144.5, 137.8, 136.8, 132.9, 131.1, 130.5, 130.4, 129.7, 129.4, 128.9, 128.9, 128.7, 128.6, 126.2, 126.0 (q,  $J_{\text{C-F}} = 278.3$  Hz), 125.5, 124.9, 123.5, 123.1, 119.9, 108.2, 73.1, 69.3, 61.8 (q,  $J_{\text{C-F}} = 30.3$  Hz), 48.6, 25.3, 20.6.  $^{19}\text{F}$  NMR (282 MHz,  $\text{CDCl}_3$ )  $\delta$  -72.0; HRMS (ESI)  $m/z$  calcd for  $\text{C}_{34}\text{H}_{27}\text{F}_3\text{N}_4\text{NaO}_2$   $[\text{M}+\text{Na}]^+$ : 603.1978, found 603.1985.

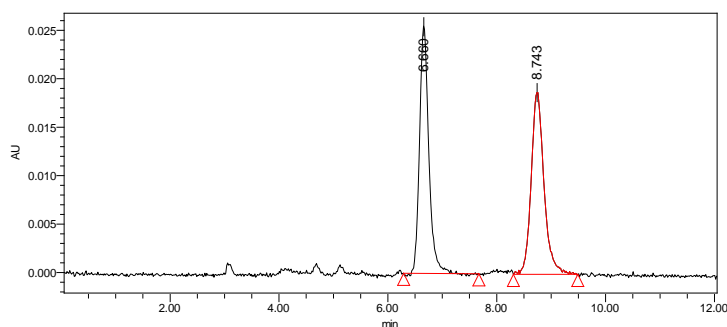

|   | Retention Time | Area   | % Area | Height | Int Type | Peak Type |
|---|----------------|--------|--------|--------|----------|-----------|
| 1 | 6.660          | 305212 | 49.73  | 25561  | bb       | Unknown   |
| 2 | 8.743          | 308533 | 50.27  | 18843  | bb       | Unknown   |

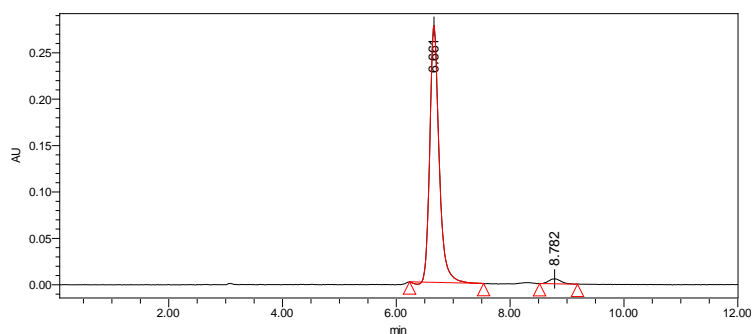

|   | Retention Time | Area    | % Area | Height | Int Type | Peak Type |
|---|----------------|---------|--------|--------|----------|-----------|
| 1 | 6.661          | 3170355 | 97.60  | 276819 | bb       | Unknown   |
| 2 | 8.782          | 78061   | 2.40   | 5289   | bb       | Unknown   |

**(3*S*,3'*S*,4'*R*,5'*R*)-3''-isopropyl-1-methyl-1'',4'-diphenyl-5'-(trifluoromethyl)dispiro[indoline-3,2'-pyrrolidine-3',4''-pyrazole]-2,5''(1''H)-dione (3wa)**

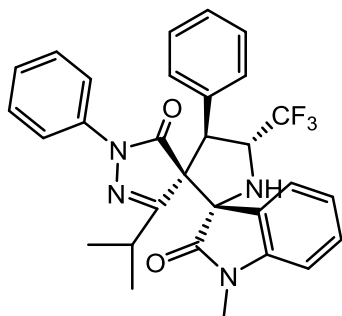

From 48.4 mg (0.20 mmol) 1-methyl-3-((2,2,2-trifluoroethyl)imino)indolin-2-one and 58 mg (0.22 mmol, 1.1 equiv) 4-benzylidene-5-isopropyl-2-phenyl-2,4-dihydro-3H-pyrazol-3-one, 91.0 mg (86 % yield) compound **3wa** was obtained as light yellow solid, mp = 182 - 183 °C.  $[\alpha]_D^{20} = +69$  ( $c = 1.0$ ,  $\text{CHCl}_3$ ). Dr (>20:1) determined by  $^1\text{H}$  and  $^{19}\text{F}$  NMR analysis. 92 % ee was determined by HPLC analysis (Daicel Chiralcel IA column, hexane/2-propanol 9:1, 1.0 mL/min). Retention time:  $t_{\text{major}} = 6.8$  min and  $t_{\text{minor}} = 5.7$  min.  $^1\text{H}$  NMR (300 MHz,  $\text{CDCl}_3$ )  $\delta$  7.89 (d,  $J = 7.6$  Hz, 1H), 7.74 (d,  $J = 8.0$  Hz, 2H), 7.50 – 7.45 (m, 2H), 7.38 (dd,  $J = 14.6, 7.3$  Hz, 3H), 7.25 (d,  $J = 4.4$  Hz, 4H), 7.18 (t,  $J = 7.5$  Hz, 1H), 6.84 (d,  $J = 7.8$  Hz, 1H), 5.45 – 5.24 (m, 1H), 4.61 (d,  $J = 10.6$  Hz, 1H), 4.00 (d,  $J = 10.4$  Hz, 1H), 3.10 (s, 3H), 2.02 (dt,  $J = 13.3, 6.6$  Hz, 1H), 0.78 (d,  $J = 6.7$  Hz, 3H), 0.31 (d,  $J = 6.6$  Hz, 3H).  $^{13}\text{C}$  NMR (75 MHz,  $\text{CDCl}_3$ )  $\delta$  172.8, 169.1, 162.7, 143.3, 137.4, 132.4, 130.5, 130.2, 129.5, 128.9, 128.8, 128.8, 126.0, 125.4, 124.6 (q,  $J_{\text{C-F}} = 243.8$  Hz), 123.2, 119.6, 109.1, 71.8, 62.6 (q,  $J_{\text{C-F}} = 30$  Hz), 50.9, 28.5, 27.0, 22.8, 20.8, -0.00.  $^{19}\text{F}$  NMR (282 MHz,  $\text{CDCl}_3$ )  $\delta$  -72.6; HRMS (ESI)  $m/z$  calcd for  $\text{C}_{30}\text{H}_{27}\text{F}_3\text{N}_4\text{NaO}_2$   $[\text{M}+\text{Na}]^+$ : 555.1978, found 555.1958.

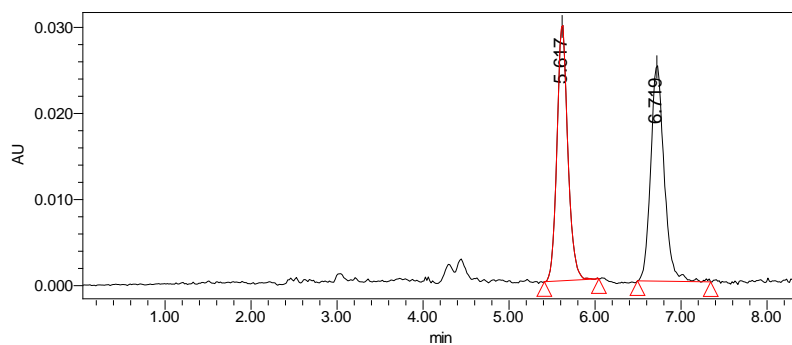

|   | 保留时间  | 面积     | % 面积  | 高度    | 积分类型 | 峰类型 |
|---|-------|--------|-------|-------|------|-----|
| 1 | 5.616 | 416060 | 48.74 | 47595 | bb   | 未知  |
| 2 | 6.719 | 437608 | 51.26 | 40655 | bb   | 未知  |

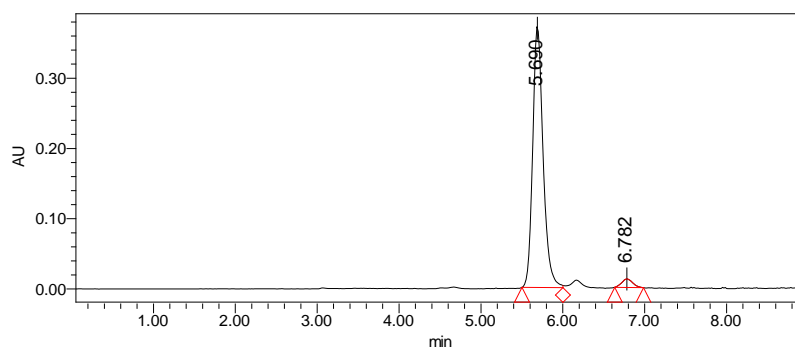

|   | 保留时间  | 面积      | % 面积  | 高度     | 积分类型 | 峰类型 |
|---|-------|---------|-------|--------|------|-----|
| 1 | 5.690 | 3278862 | 96.70 | 372118 | bv   | 未知  |
| 2 | 6.782 | 111859  | 3.30  | 12118  | bb   | 未知  |

**(3*S*,3'*S*,4'*R*,5'*R*)-3''-ethyl-1-methyl-1'',4'-diphenyl-5'-(trifluoromethyl)dispiro[indoline-3,2'-pyrrolidine-3',4''-pyrazole]-2,5''(1''H)-dione (3xa)**

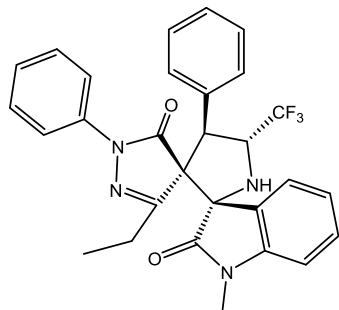

From 48.4 mg (0.20 mmol) 1-methyl-3-((2,2,2-trifluoroethyl)imino)indolin-2-one and 55.2 mg (0.22 mmol, 1.1 equiv) 4-benzylidene-5-ethyl-2-phenyl-2,4-dihydro-3H-pyrazol-3-one, 97.0 mg (94 % yield) compound **3xa** was obtained as light yellow solid, mp = 174 - 175 °C.  $[\alpha]_D^{20} = +97$  ( $c = 1.0$ ,  $\text{CHCl}_3$ ). Dr (>20:1) determined by  $^1\text{H}$

and  $^{19}\text{F}$  NMR analysis. 93 % ee was determined by HPLC analysis (Daicel Chiralcel IA column, hexane/2-propanol 9:1, 1.0 mL/min). Retention time:  $t_{\text{major}} = 8.3$  min and  $t_{\text{minor}} = 6.6$  min.  $^1\text{H}$  NMR (300 MHz,  $\text{CDCl}_3$ )  $\delta$  7.84 (d,  $J = 7.5$  Hz, 1H), 7.63 (d,  $J = 7.6$  Hz, 2H), 7.42 (d,  $J = 7.7$  Hz, 1H), 7.36 (dd,  $J=9.2, 4.9$  Hz, 3H), 7.31 (s, 1H), 7.28 (s, 1H), 7.26 – 7.22 (m, 3H), 7.12 (t,  $J = 7.4$  Hz, 1H), 6.82 (d,  $J = 7.8$  Hz, 1H ), 5.57 – 5.37 (m, 1H), 4.53 (d,  $J = 10.8$  Hz, 1H), 3.96 (d,  $J = 10.2$  Hz, 1H), 3.06 (s, 3H), 2.04-1.88 (m, 1H ), 0.92 (dd,  $J= 14.1, 6.9$  Hz, 1H ), 0.88-0.79 (m, 3H ).  $^{13}\text{C}$  NMR (75 MHz,  $\text{CDCl}_3$ )  $\delta$  173.3, 168.7, 158.2, 142.8, 137.3, 131.6, 130.5, 130.4, 128.9, 128.8, 128.7, 128.6, 126.3 (q,  $J_{\text{C-F}}= 277.7$  Hz ), 125.8, 125.4, 123.1, 119.4, 108.8, 72.4, 71.6, 61.1 (q,  $J_{\text{C-F}}= 30.2$  Hz ), 50.7, 27.0, 22.5, 9.5.  $^{19}\text{F}$  NMR (282 MHz,  $\text{CDCl}_3$ )  $\delta$  -73.0 ; HRMS (ESI)  $m/z$  calcd for  $\text{C}_{33}\text{H}_{25}\text{F}_3\text{N}_4\text{NaO}_2$   $[\text{M}+\text{Na}]^+$ : 541.1822, found 541.1802.

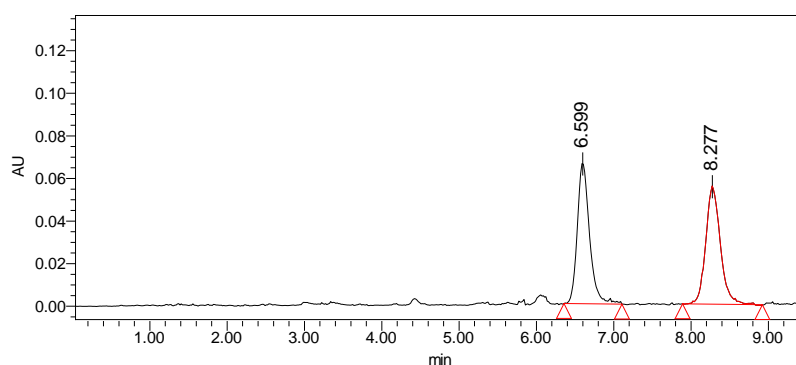

|   | 保留时间  | 面积     | % 面积  | 高度    | 积分类型 | 峰类型 |
|---|-------|--------|-------|-------|------|-----|
| 1 | 6.599 | 728323 | 49.96 | 66076 | bb   | 未知  |
| 2 | 8.277 | 729444 | 50.04 | 55060 | bb   | 未知  |

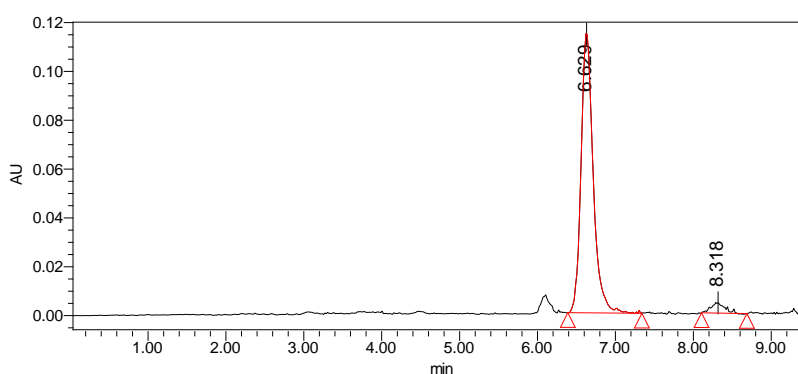

|   | 保留时间  | 面积      | % 面积  | 高度     | 积分类型 | 峰类型 |
|---|-------|---------|-------|--------|------|-----|
| 1 | 6.629 | 1241997 | 95.79 | 114868 | bb   | 未知  |
| 2 | 8.318 | 54580   | 4.21  | 4196   | bb   | 未知  |

#### 4. X-ray Structure of Compound 3ca

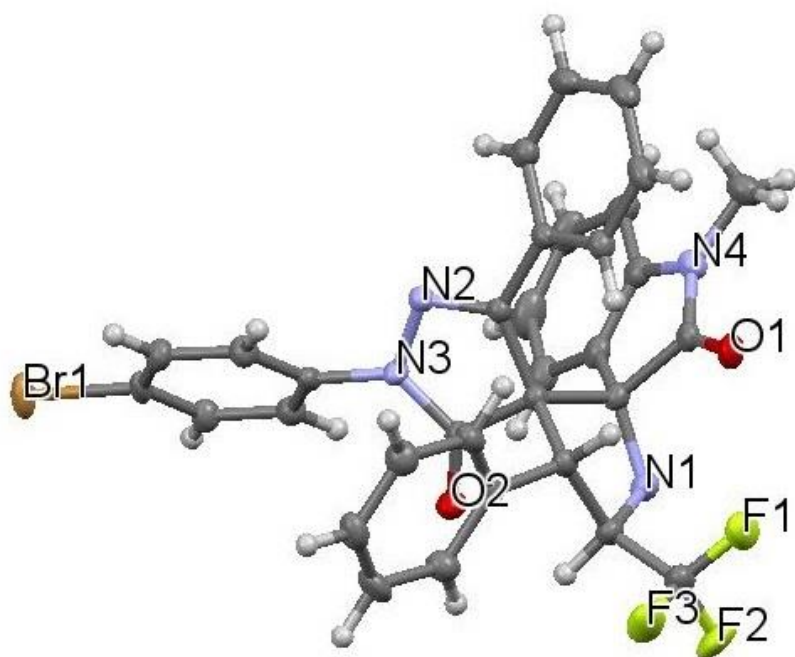

## 5. X-ray Structure of Compound 30a

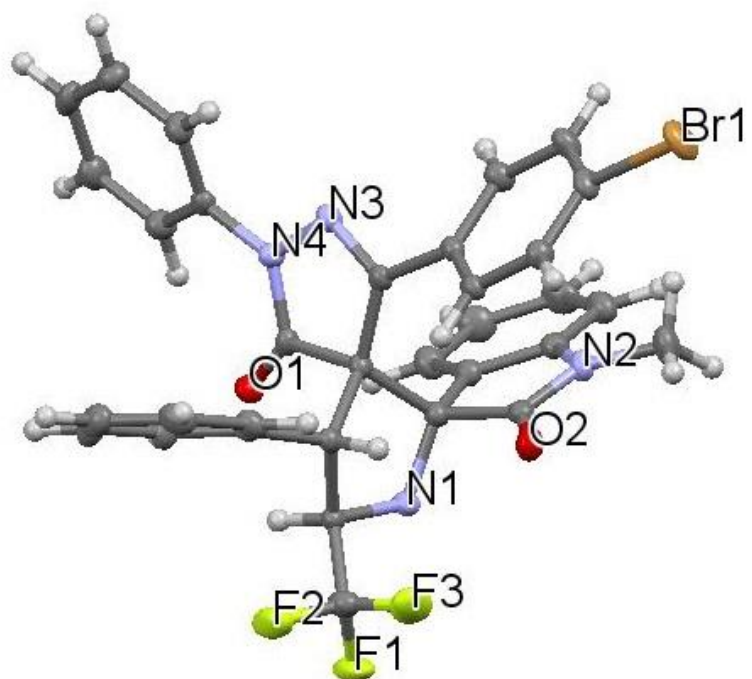

## 6. X-ray Structure of Compound 3ta

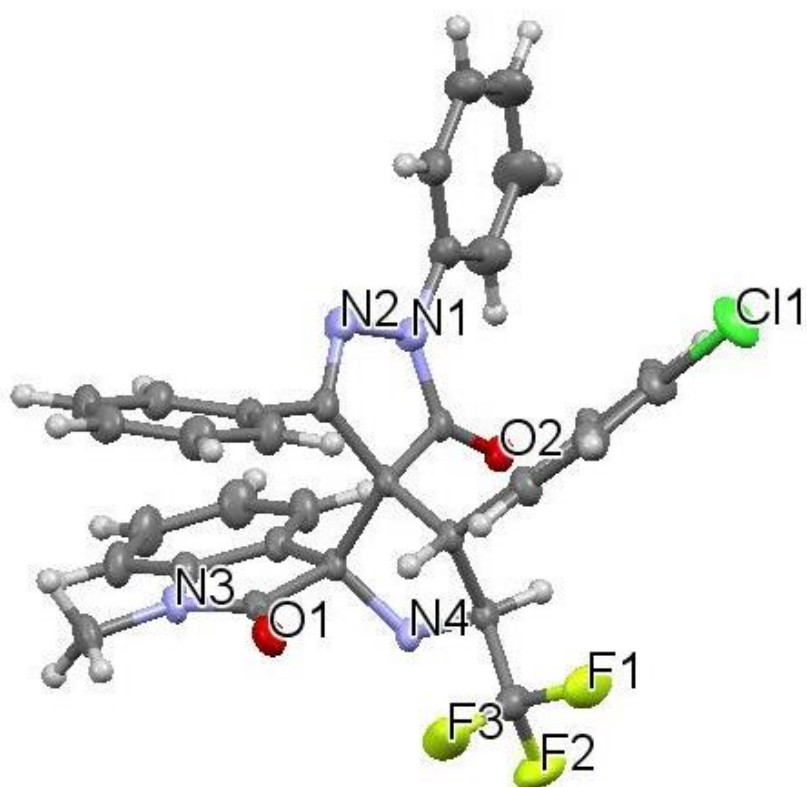



7.296  
7.288  
7.266  
7.242  
7.235  
7.222  
7.210  
7.206  
7.181  
7.157  
7.132  
7.106  
7.083  
7.051  
7.016  
6.992  
6.974  
6.947  
6.934  
6.909  
6.884  
6.857  
6.611  
6.585  
5.821  
5.787  
5.596  
5.575  
5.551  
5.519  
5.494  
5.468  
5.462  
5.436

3.560  
3.527

2.349

0.000

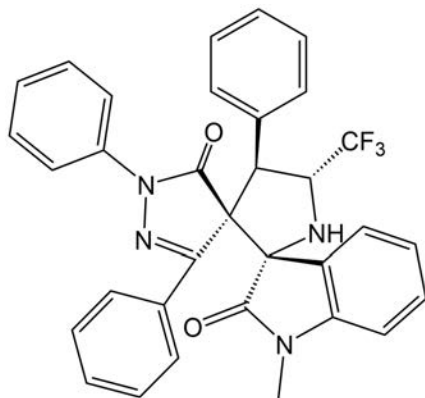

**3aa**

<sup>1</sup>H NMR (300 MHz, CDCl<sub>3</sub>)

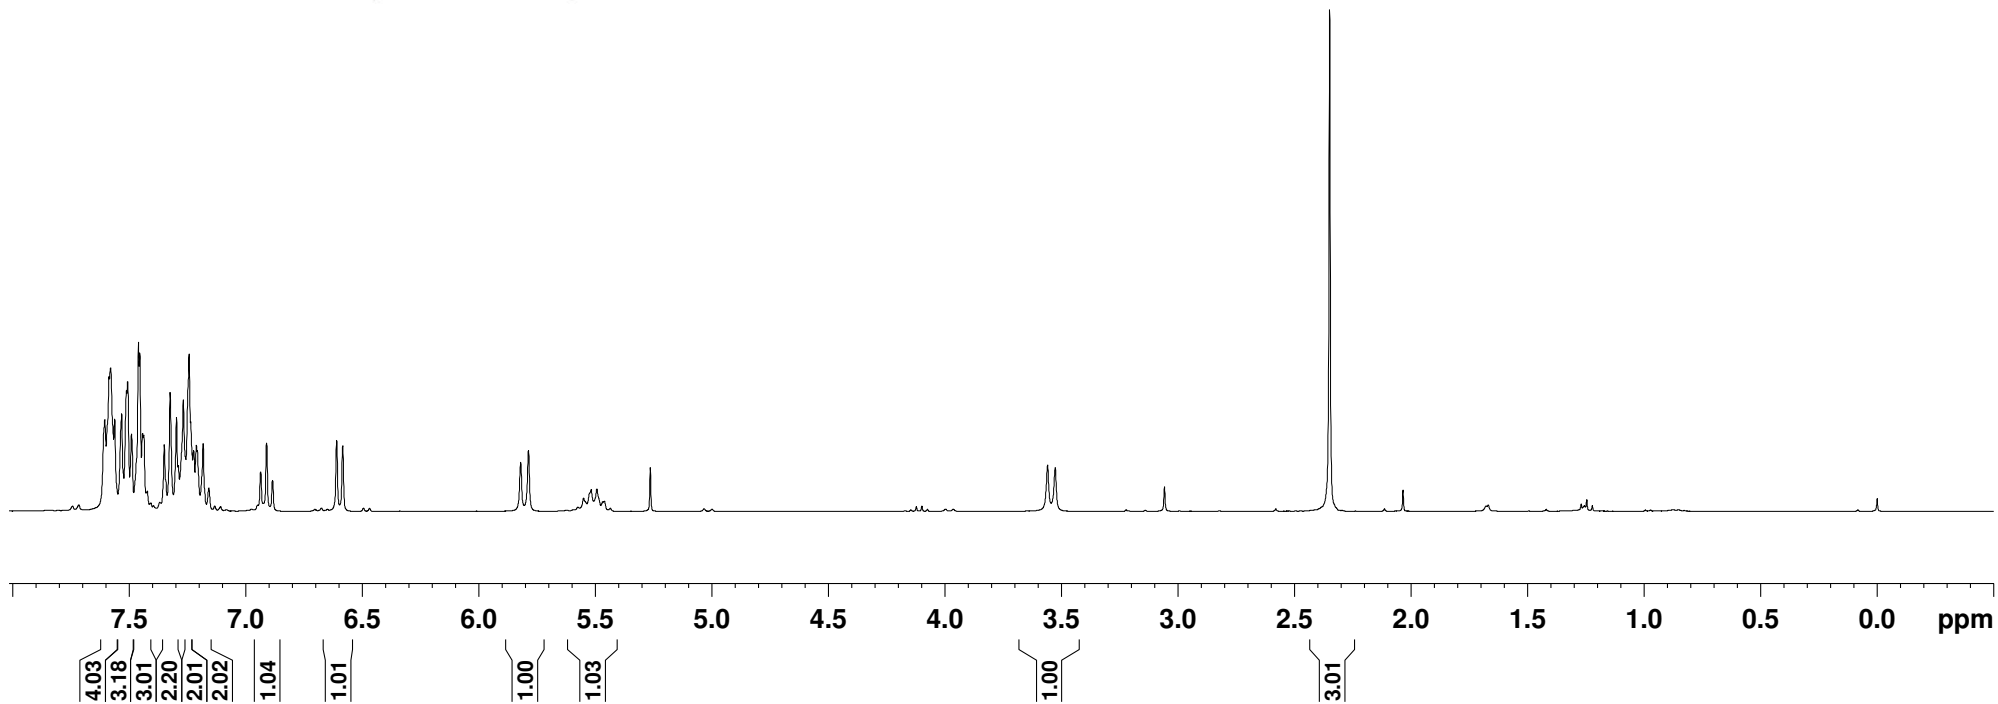

— 173.93  
 — 170.70  
 — 154.93  
 — 143.81  
 — 136.65  
 — 132.87  
 — 131.06  
 — 130.38  
 — 130.28  
 — 128.94  
 — 128.85  
 — 128.78  
 — 128.51  
 — 128.07  
 — 127.50  
 — 126.26  
 — 124.71  
 — 124.43  
 — 123.03  
 — 122.89  
 — 121.93  
 — 120.17  
 — 108.14

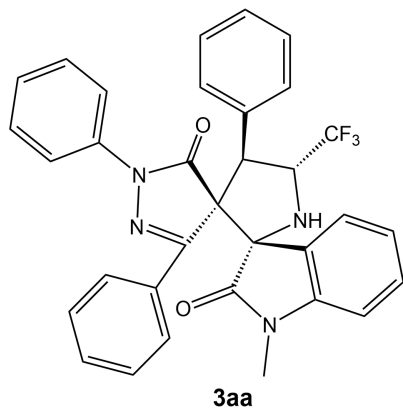

<sup>13</sup>C NMR (100 MHz, CDCl<sub>3</sub>)

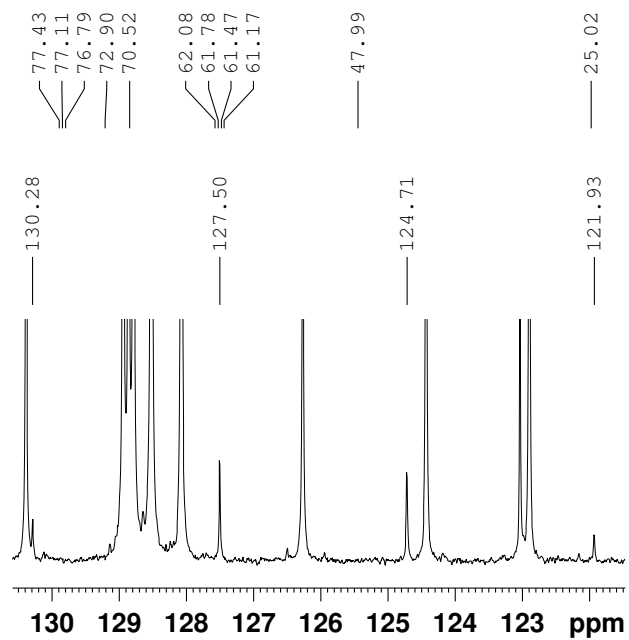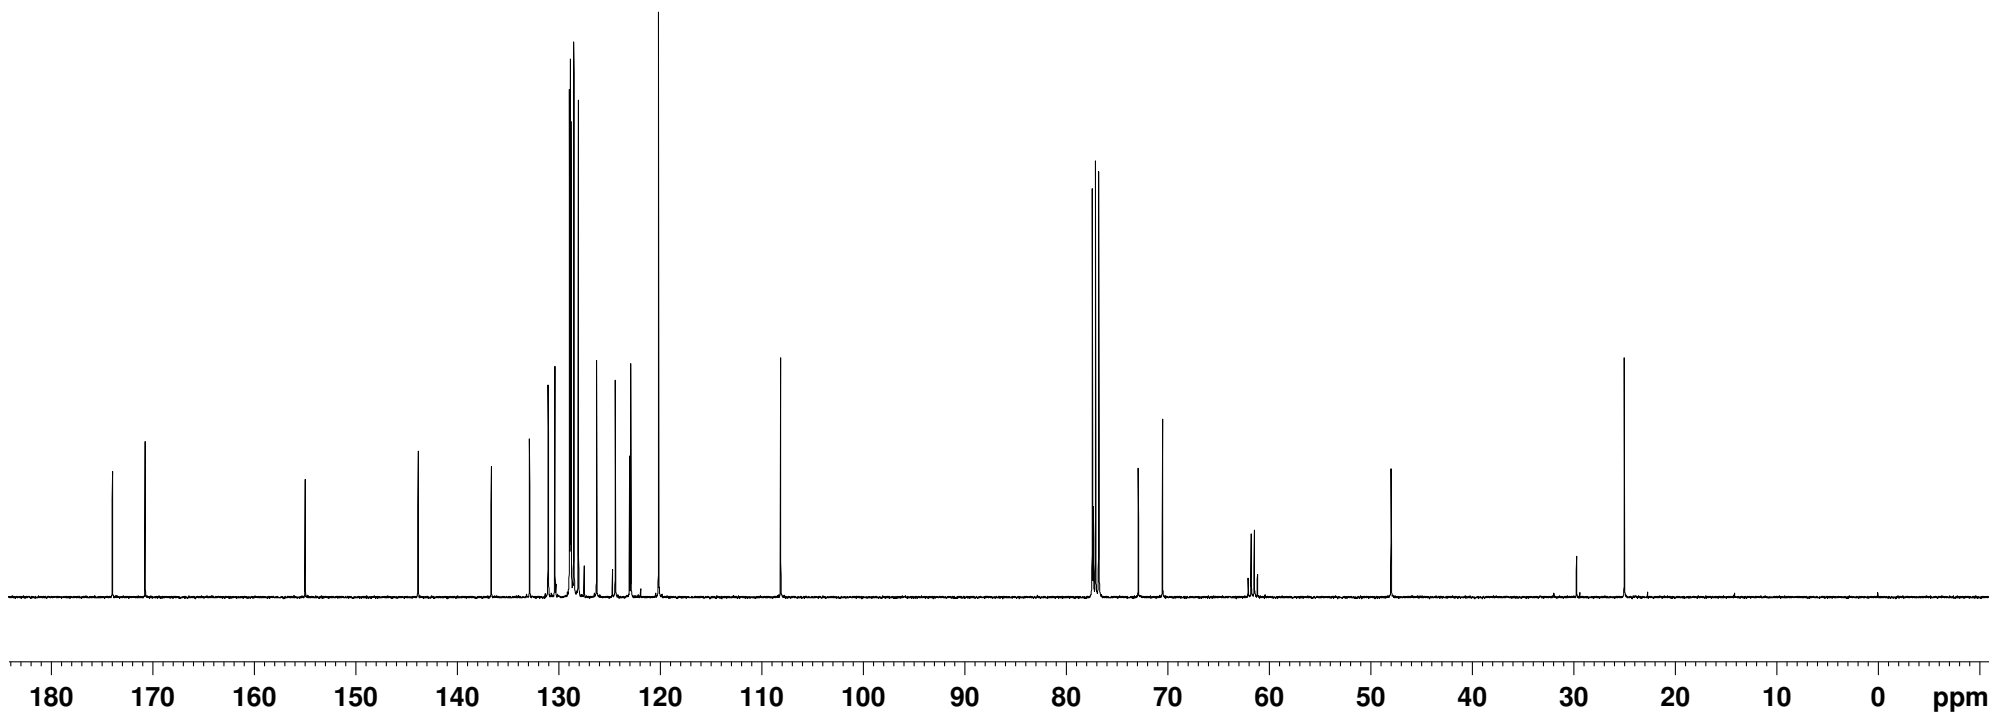

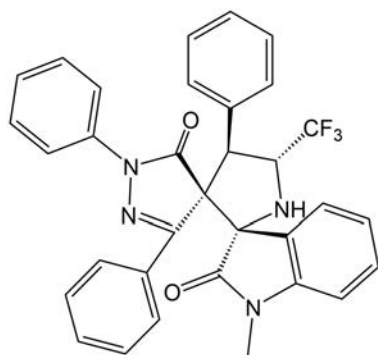

**3aa**

<sup>19</sup>F NMR (282 MHz, CDCl<sub>3</sub>)

— -72.050

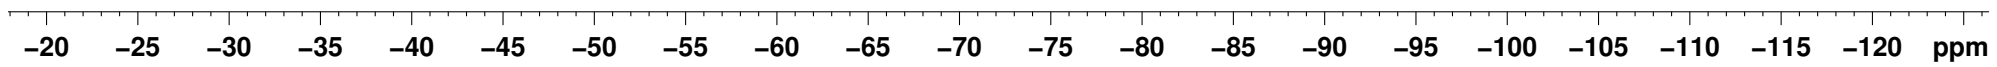

7.529  
7.525  
7.511  
7.486  
7.405  
7.383  
7.378  
7.354  
7.330  
7.302  
7.294  
7.285  
7.264  
7.235  
7.223  
7.213  
7.185  
7.163  
7.160  
6.914  
6.912  
6.888  
6.886  
6.863  
6.861  
6.665  
6.639  
5.744  
5.711  
5.512  
5.487  
5.480  
5.455  
5.430  
5.423

3.490  
3.457

— 0.000

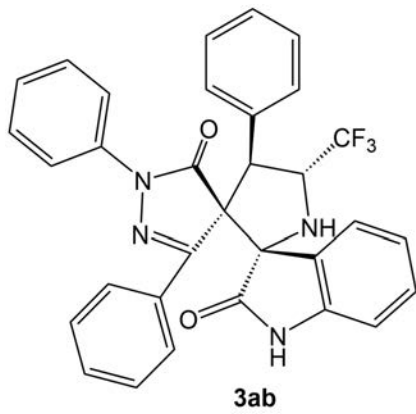

<sup>1</sup>H NMR (300 MHz, CDCl<sub>3</sub>)

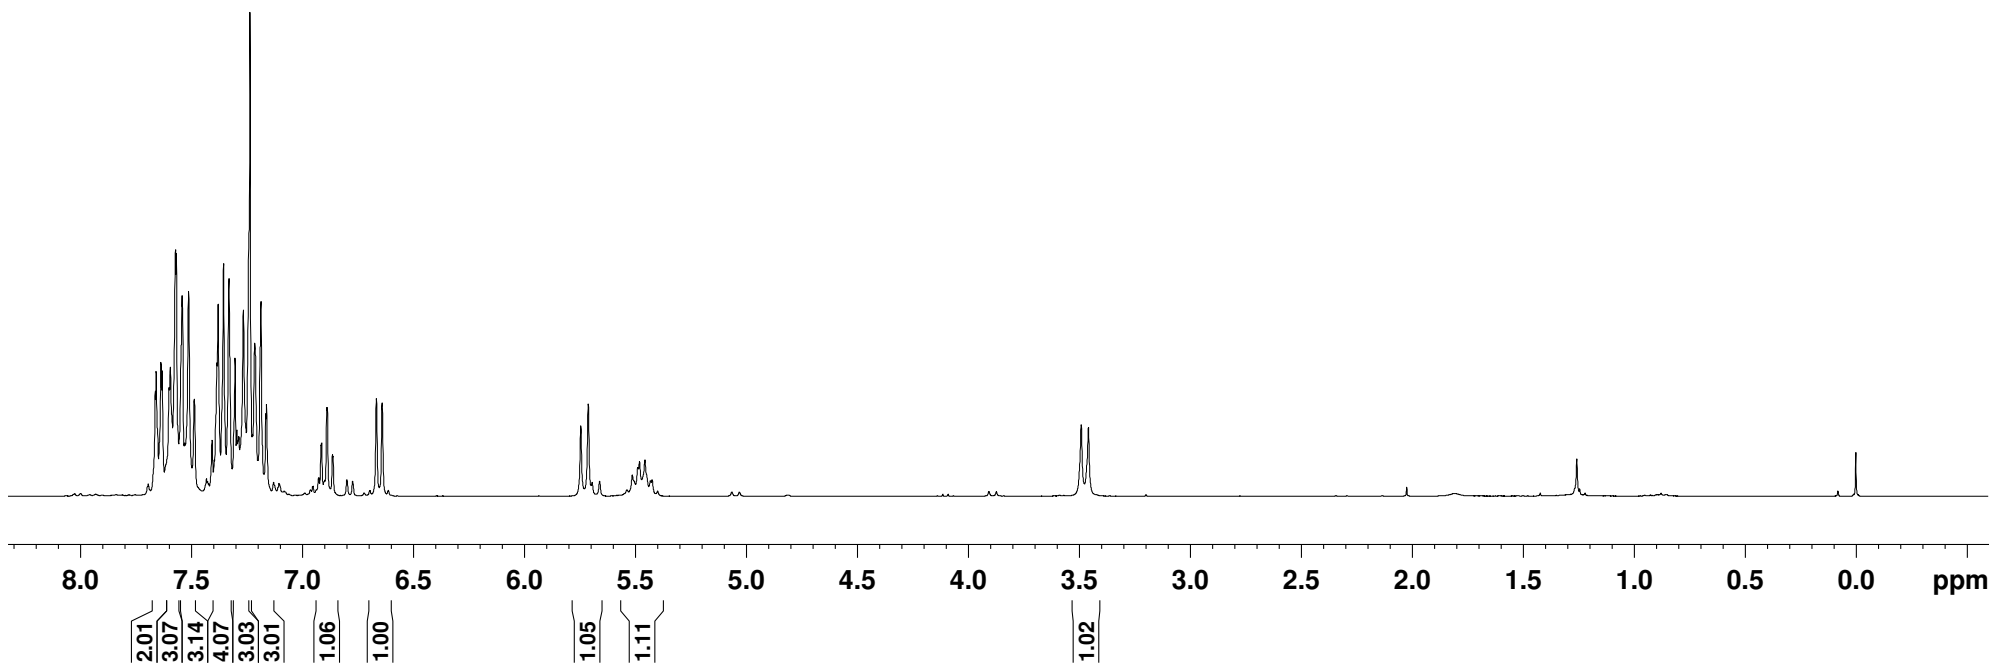

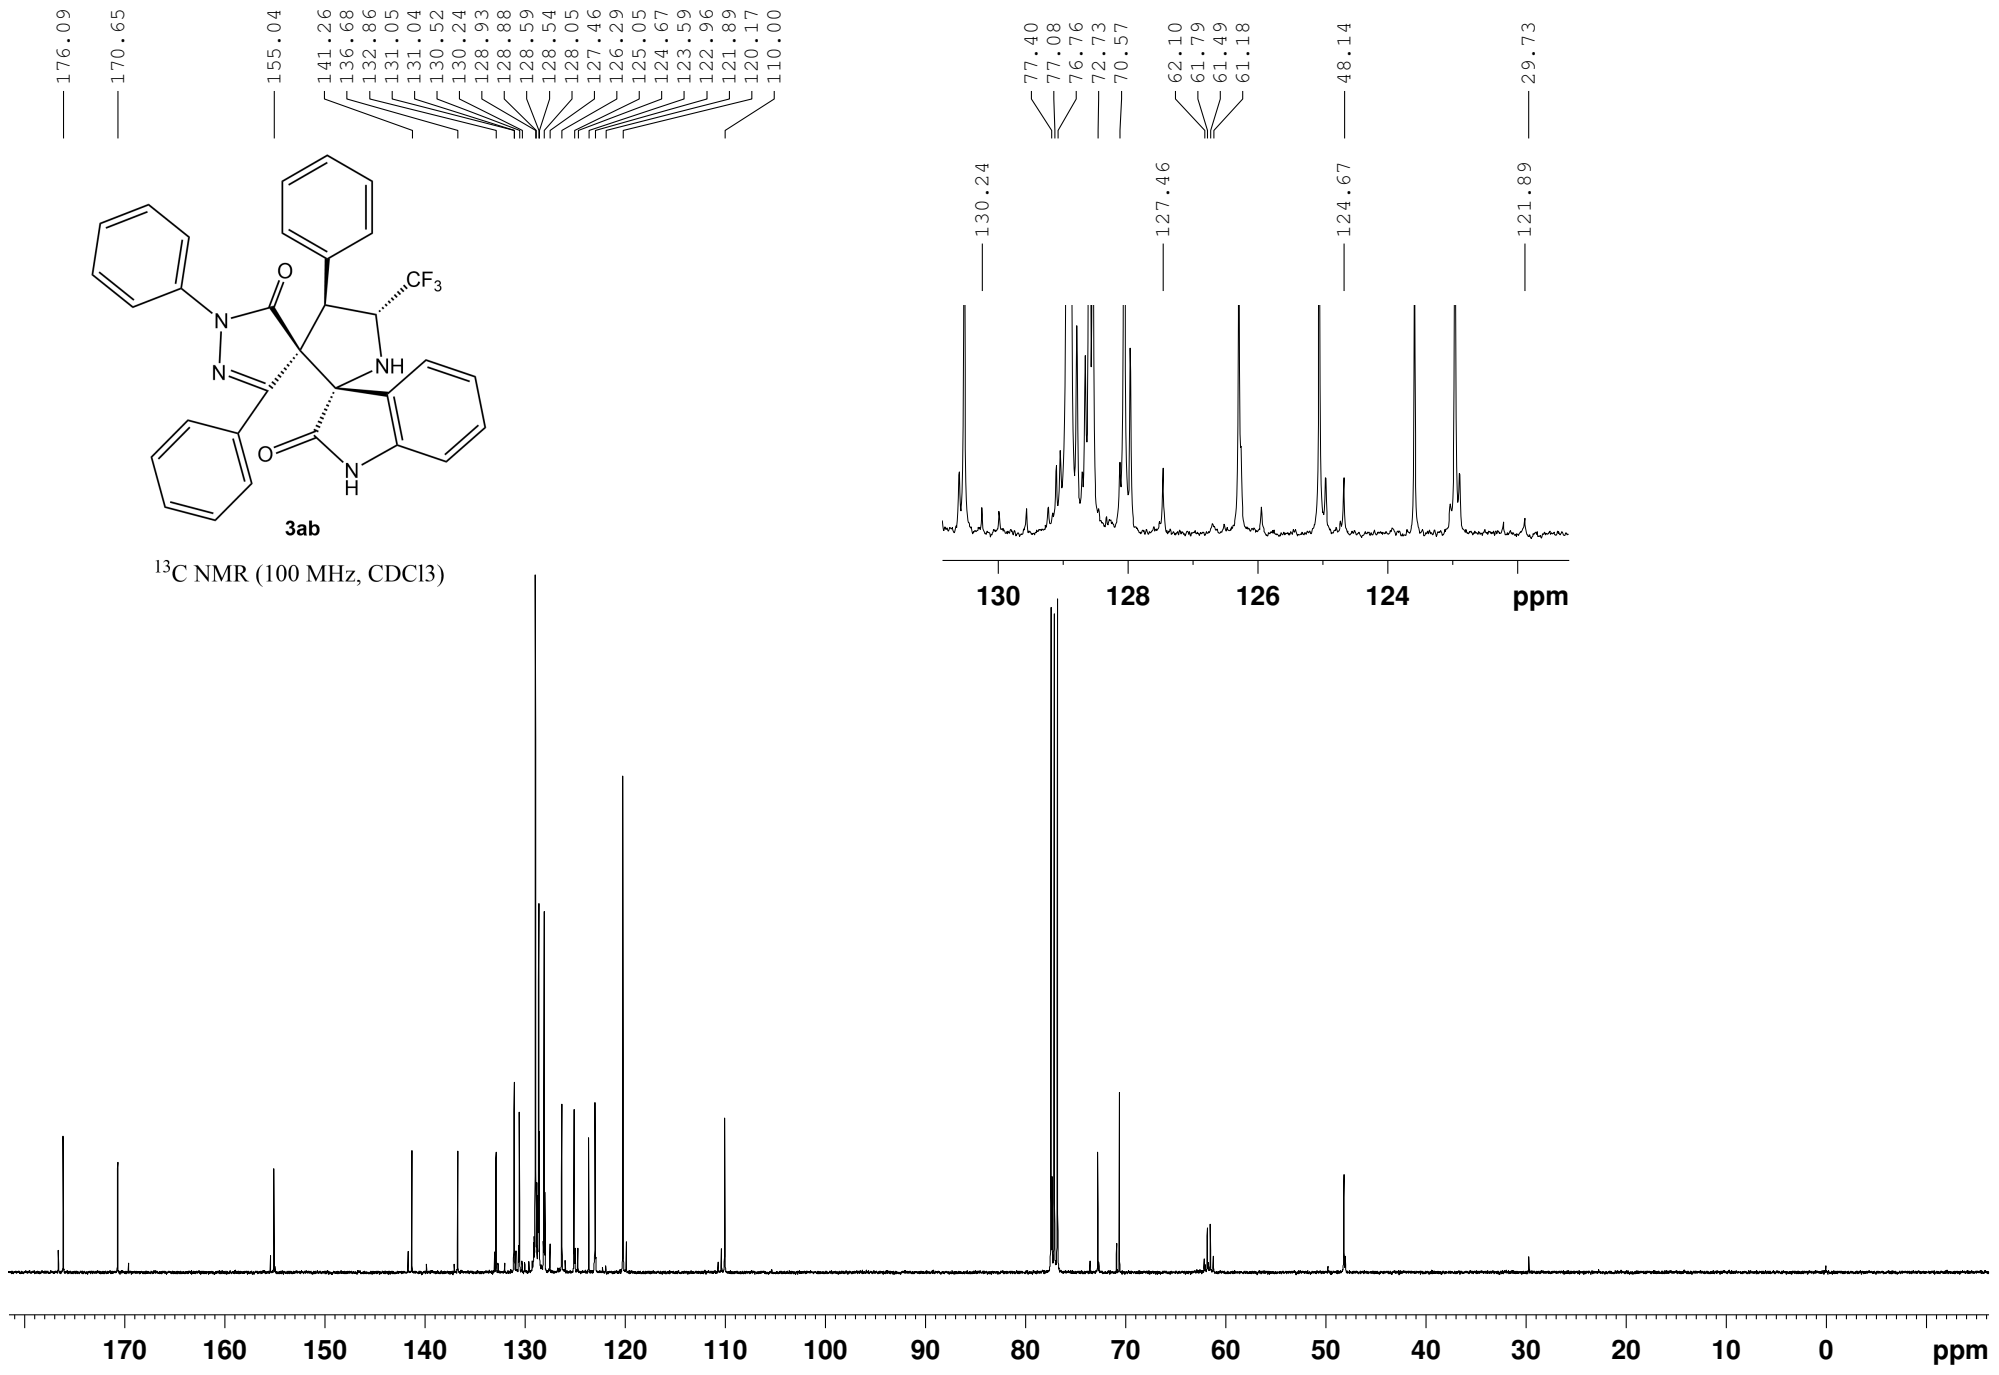

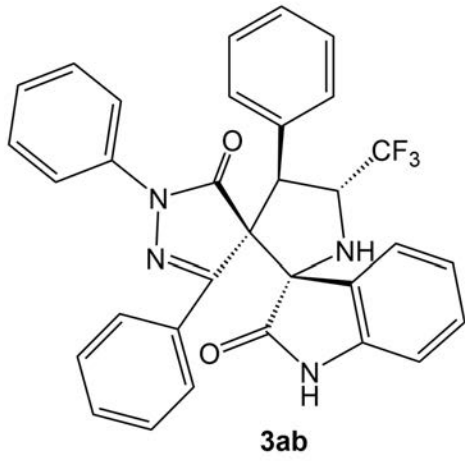

$^{19}\text{F}$  NMR (282 MHz,  $\text{CDCl}_3$ )

— -72.036

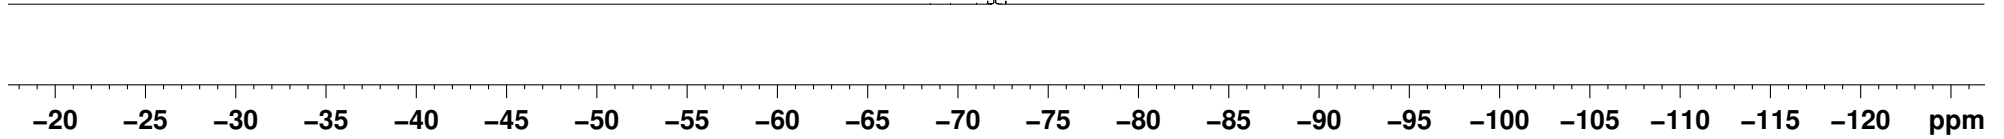

7.510  
7.506  
7.499  
7.481  
7.469  
7.459  
7.444  
7.439  
7.430  
7.360  
7.356  
7.350  
7.343  
7.325  
7.307  
7.303  
7.297  
7.271  
7.262  
7.255  
7.246  
7.220  
7.216  
7.192  
7.167  
7.125  
7.122  
7.099  
7.096  
7.073  
7.071  
5.664  
5.630  
5.603  
5.580  
5.557  
5.550  
5.526  
5.518  
5.502  
5.493  
5.470

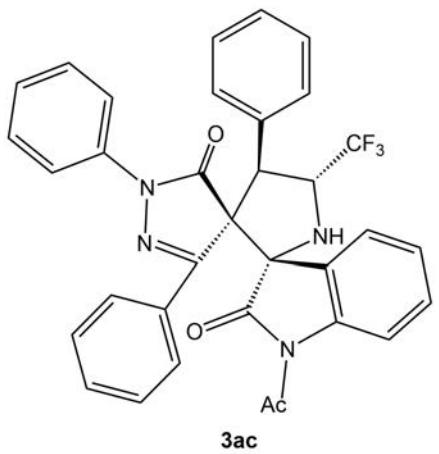

<sup>1</sup>H NMR (300 MHz, CDCl<sub>3</sub>)

3.452  
3.422

1.845

-0.000

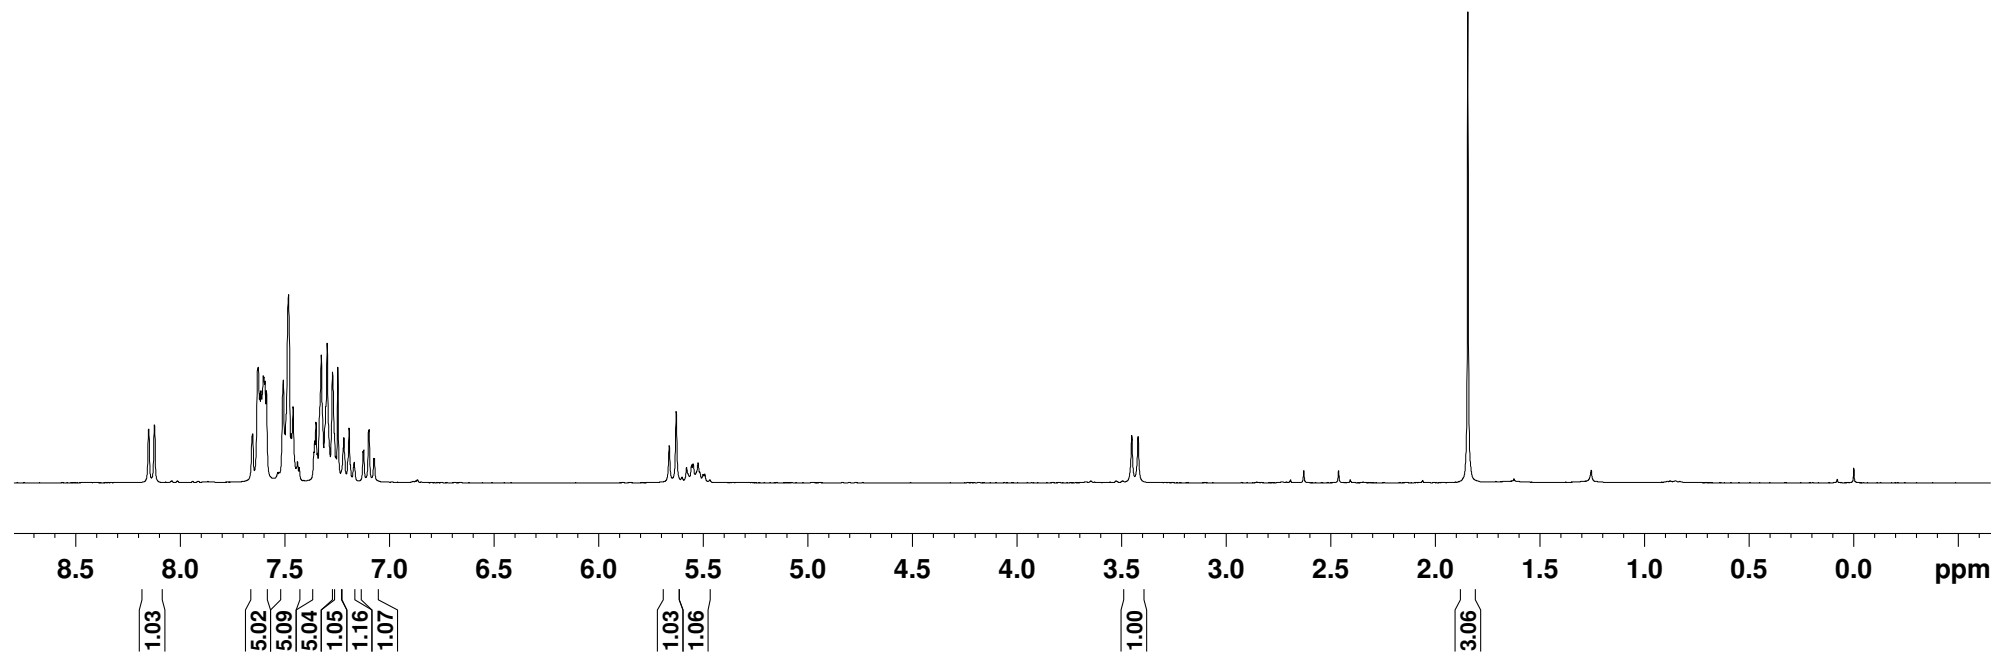

175.22  
 170.36  
 169.97  
 154.17  
 140.19  
 136.46  
 132.39  
 131.55  
 131.22  
 130.84  
 130.09  
 129.08  
 128.89  
 128.73  
 128.68  
 128.63  
 127.30  
 126.45  
 125.58  
 124.52  
 124.20  
 122.26  
 121.73  
 120.13  
 116.69

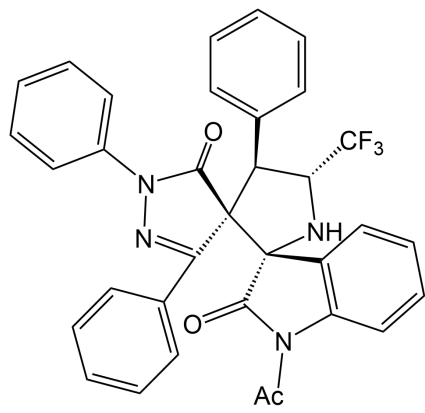

**3ac**

<sup>13</sup>C NMR (100 MHz, CDCl<sub>3</sub>)

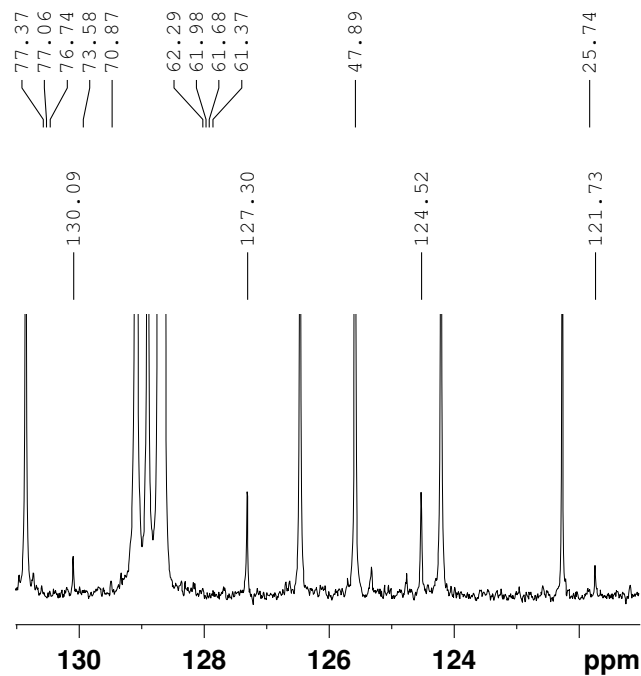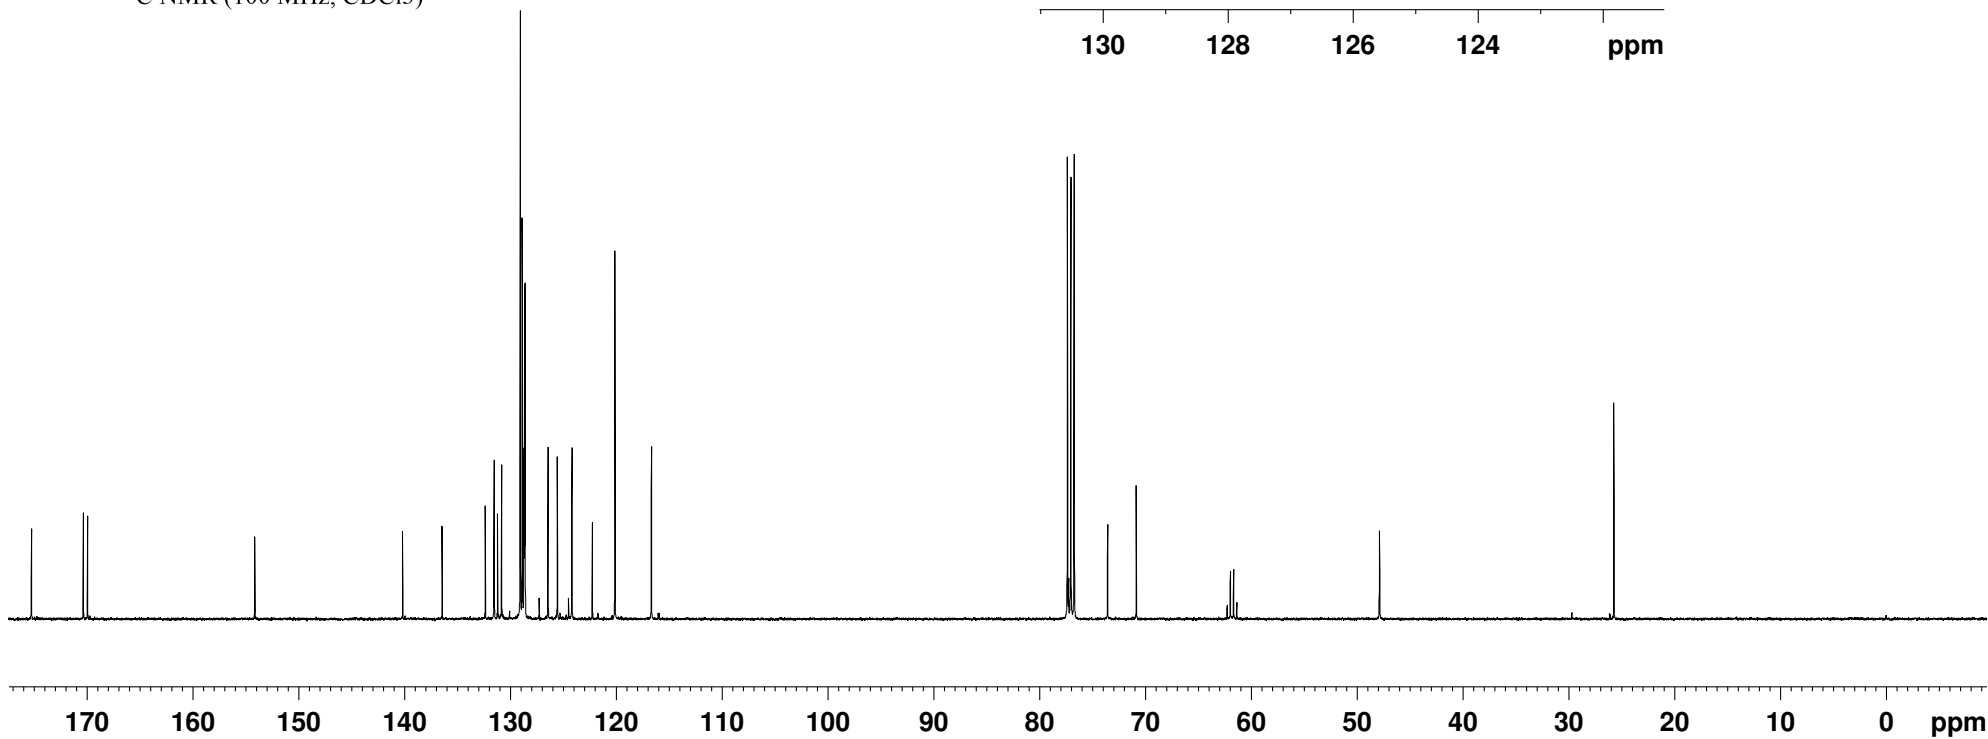



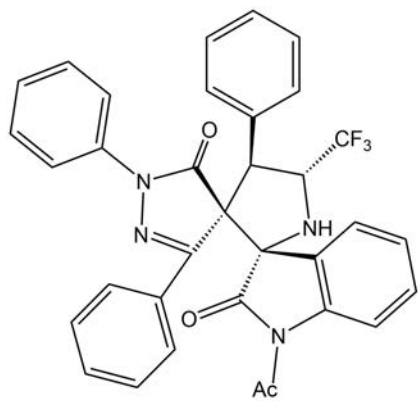

3ac

<sup>19</sup>F NMR (282 MHz, CDCl<sub>3</sub>)

— -72.429

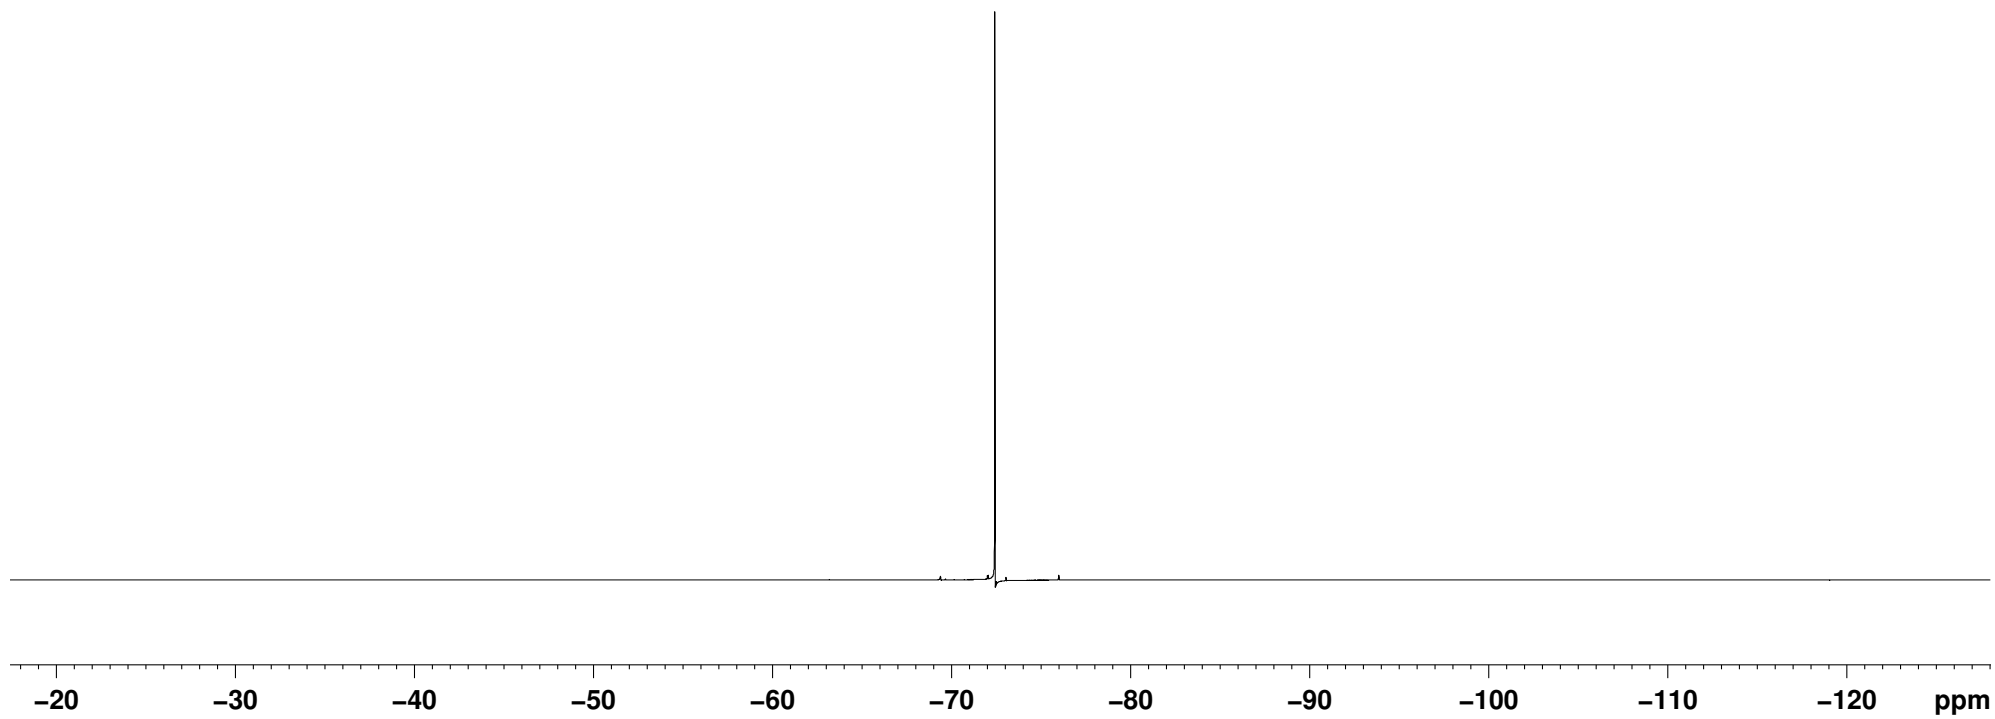

7.375  
7.365  
7.355  
7.305  
7.279  
7.231  
7.205  
7.178  
7.151  
7.129  
7.104  
7.095  
7.074  
7.055  
7.046  
7.038  
6.991  
6.967  
6.941  
6.827  
6.816  
6.803  
6.748  
6.723  
6.698  
6.374  
6.348  
5.822  
5.789  
5.494  
5.466  
5.441  
5.415

4.032  
3.980  
3.780  
3.727  
3.490  
3.458

1.165

-0.000

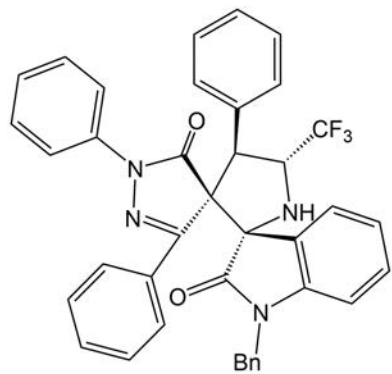

**3ad**

<sup>1</sup>H NMR (300 MHz, CDCl<sub>3</sub>)

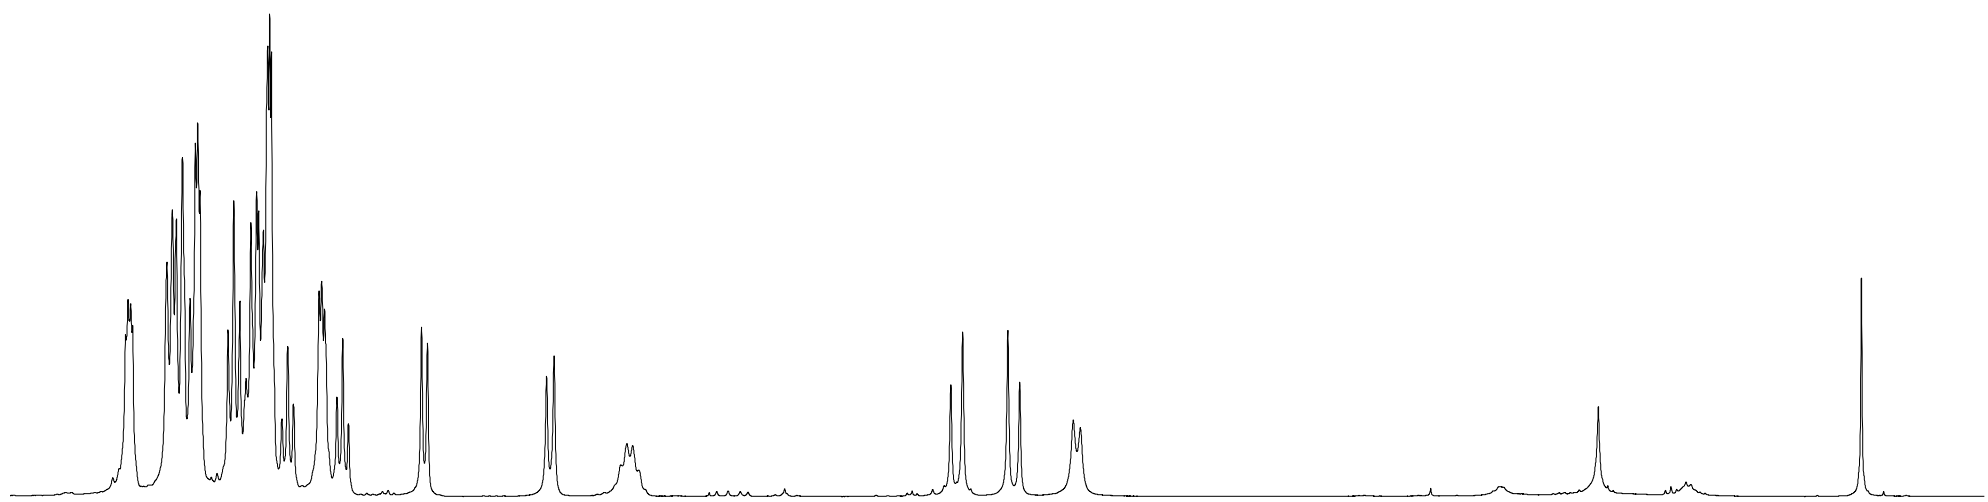

8.0 7.5 7.0 6.5 6.0 5.5 5.0 4.5 4.0 3.5 3.0 2.5 2.0 1.5 1.0 0.5 0.0 ppm

2.08  
3.07  
2.01  
3.12  
3.03  
3.06  
3.12  
1.10  
2.07  
1.09  
1.10  
1.05  
1.09  
1.09  
1.04  
1.00

173.11  
 169.59  
 153.38  
 142.04  
 135.54  
 133.69  
 131.69  
 130.63  
 129.97  
 129.81  
 129.53  
 127.82  
 127.77  
 127.62  
 127.39  
 127.14  
 126.92  
 126.46  
 126.20  
 125.19  
 123.46  
 123.21  
 122.01  
 121.86  
 119.50  
 119.04  
 108.38

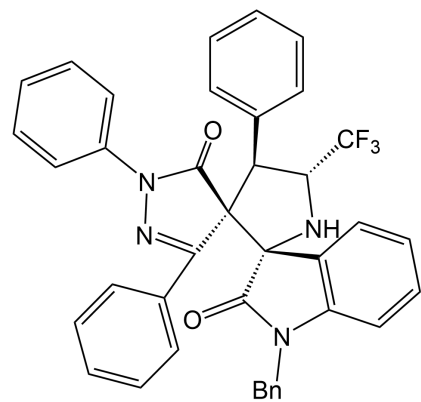

**3ad**

$^{13}\text{C}$  NMR (75 MHz,  $\text{CDCl}_3$ )

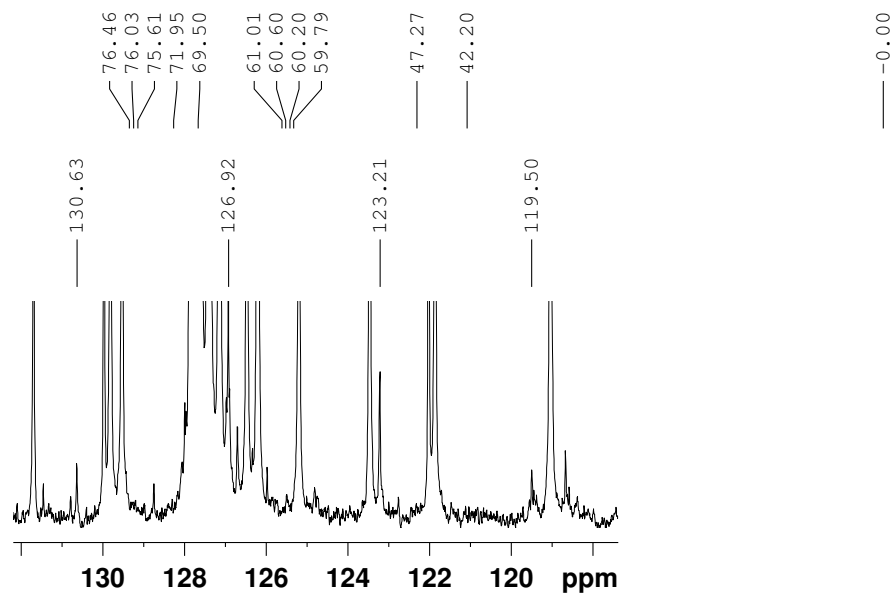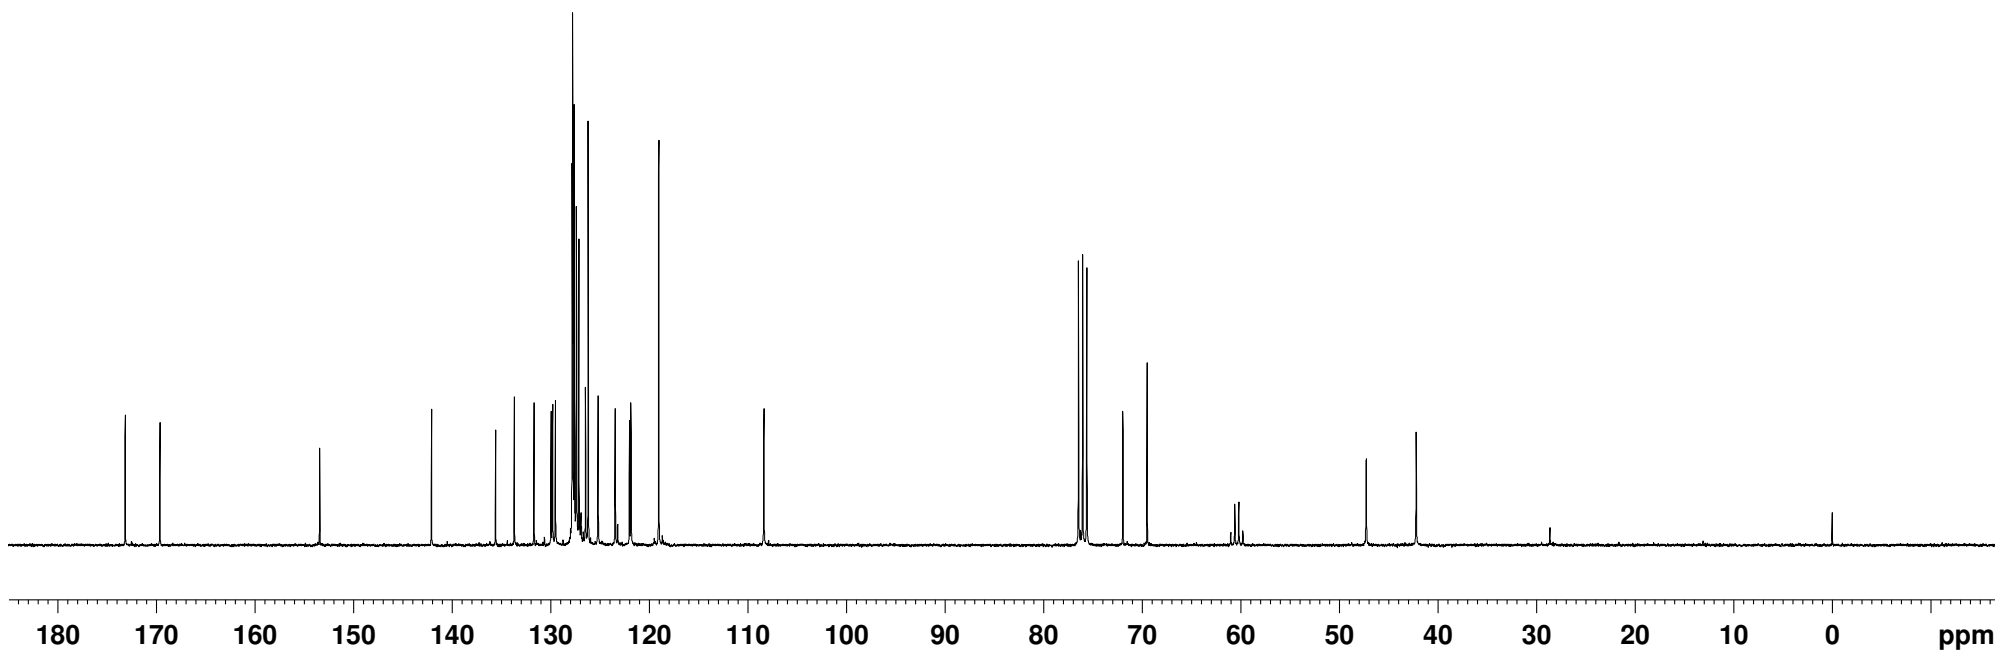

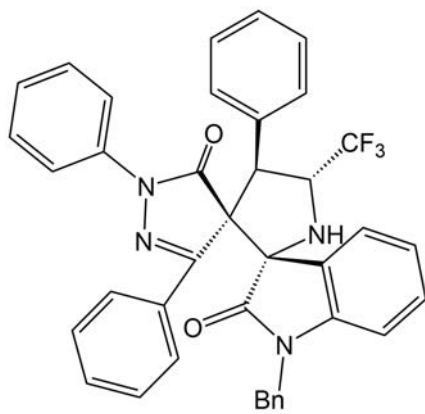

**3ad**

<sup>19</sup>F NMR (282 MHz, CDCl<sub>3</sub>)

— -71.899

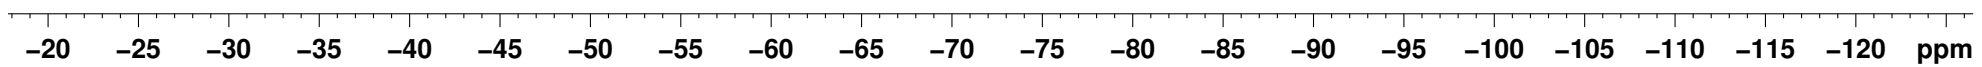

7.481  
7.479  
7.471  
7.464  
7.449  
7.438  
7.424  
7.418  
7.409  
7.337  
7.331  
7.313  
7.286  
7.258  
7.235  
7.206  
7.203  
7.199  
7.188  
7.174  
7.150  
7.045  
7.021  
7.020  
6.996  
6.994  
5.731  
5.697  
5.595  
5.571  
5.564  
5.539  
5.515  
5.507

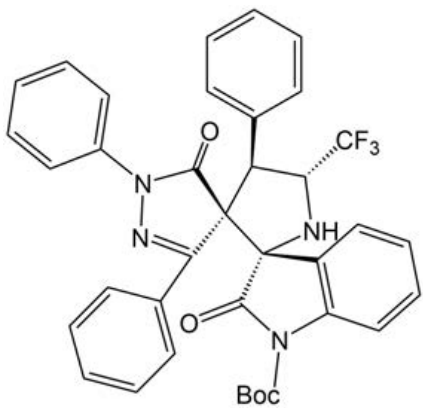

**3ae**

<sup>1</sup>H NMR (300 MHz, CDCl<sub>3</sub>)

3.439  
3.408

1.409

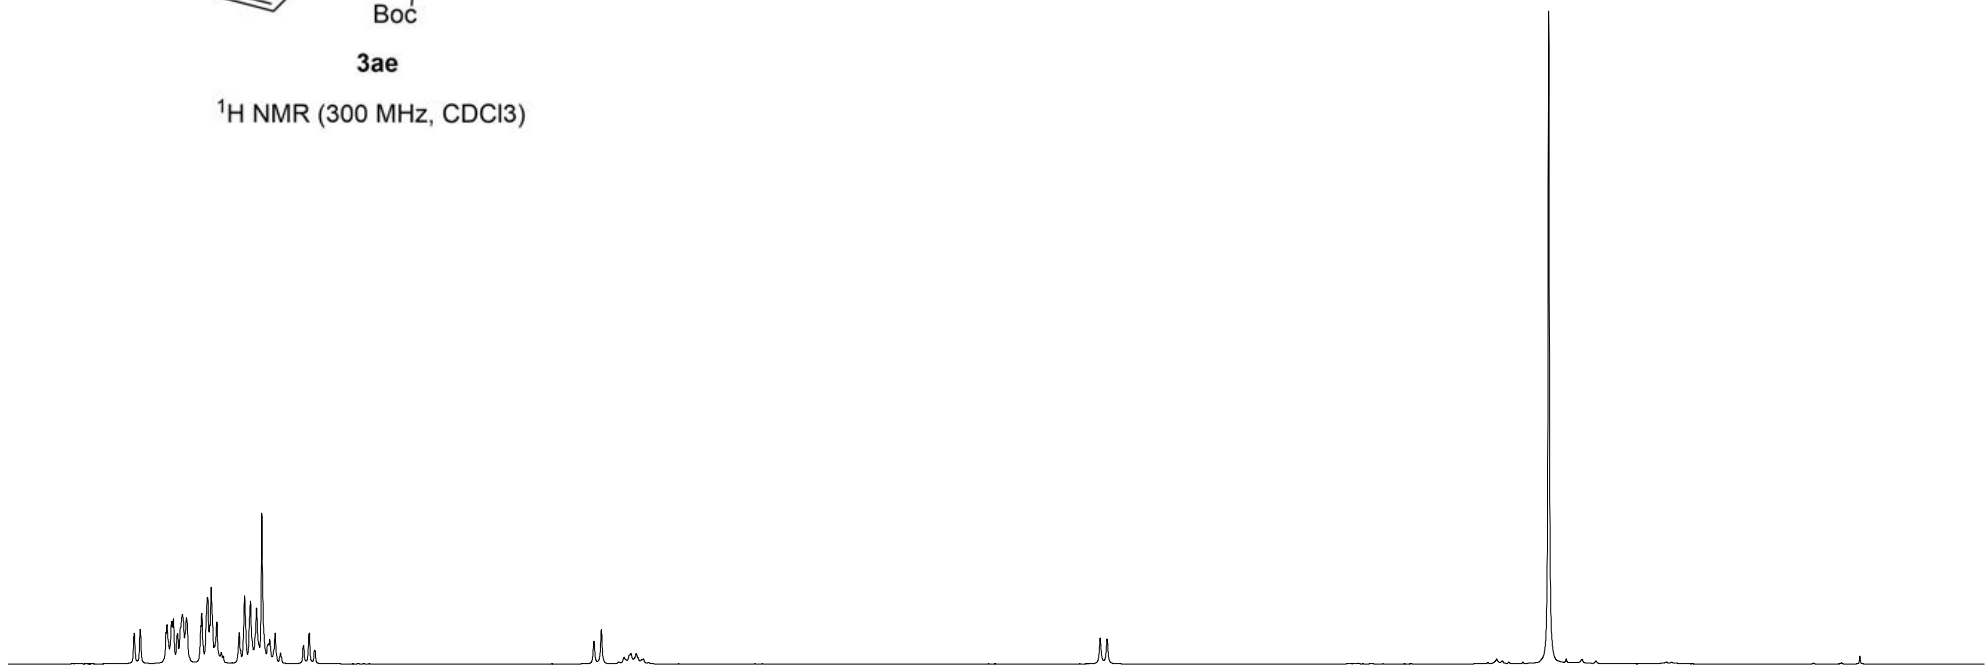

8.0 7.5 7.0 6.5 6.0 5.5 5.0 4.5 4.0 3.5 3.0 2.5 2.0 1.5 1.0 0.5 0.0 ppm

1.05  
2.02  
3.03  
2.13  
2.07  
3.03  
5.09  
1.06  
1.00  
1.02  
1.00  
9.05

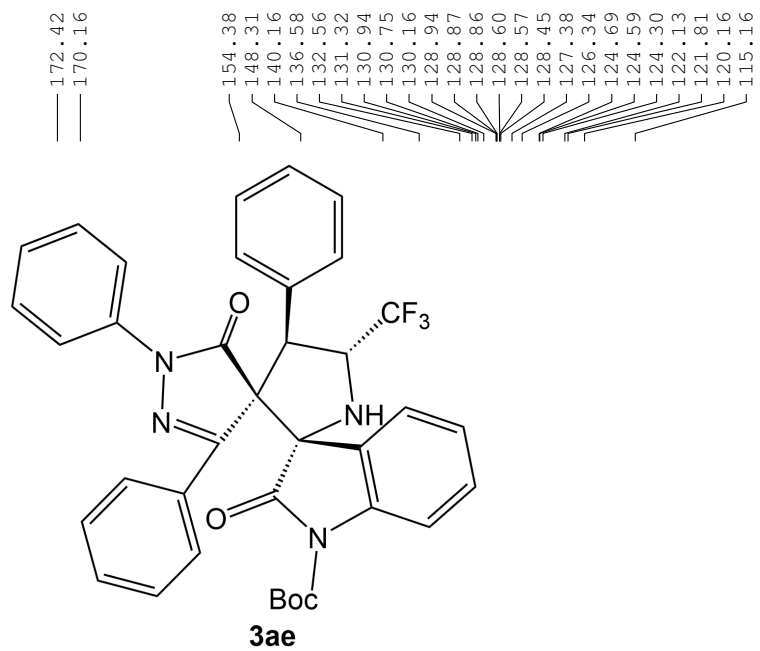

<sup>13</sup>C NMR (100 MHz, CDCl<sub>3</sub>)

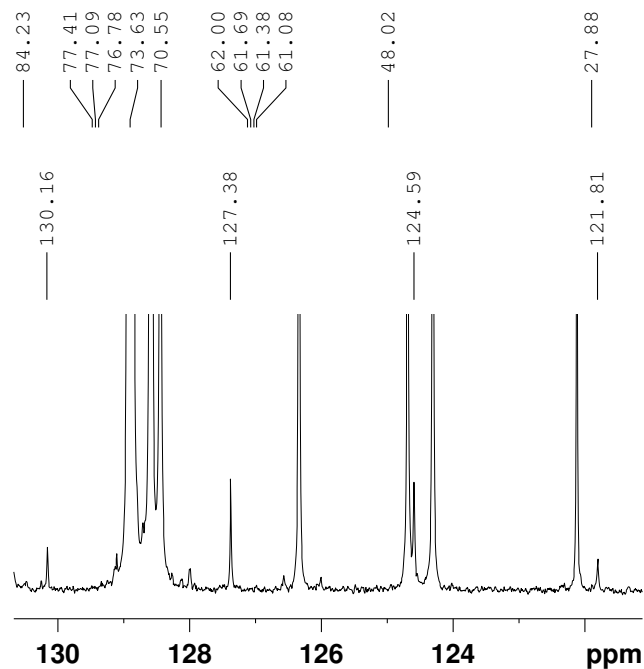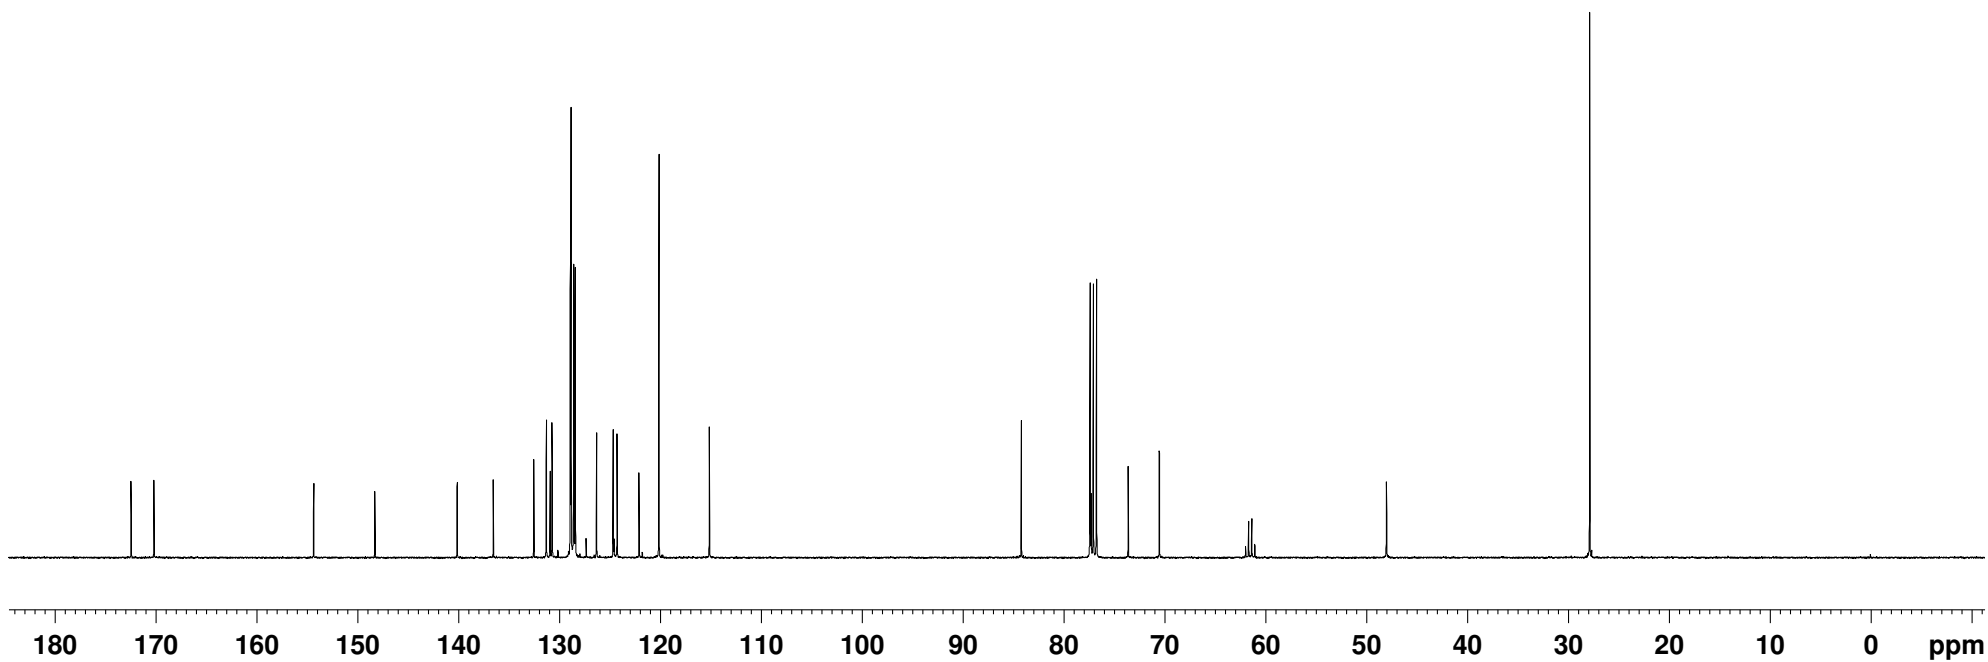

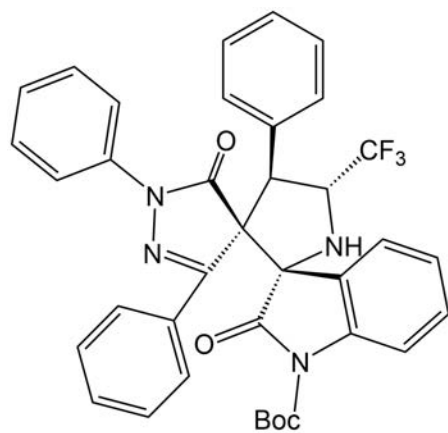

**3ae**

$^{19}\text{F}$  NMR (282 MHz,  $\text{CDCl}_3$ )

— -72.090

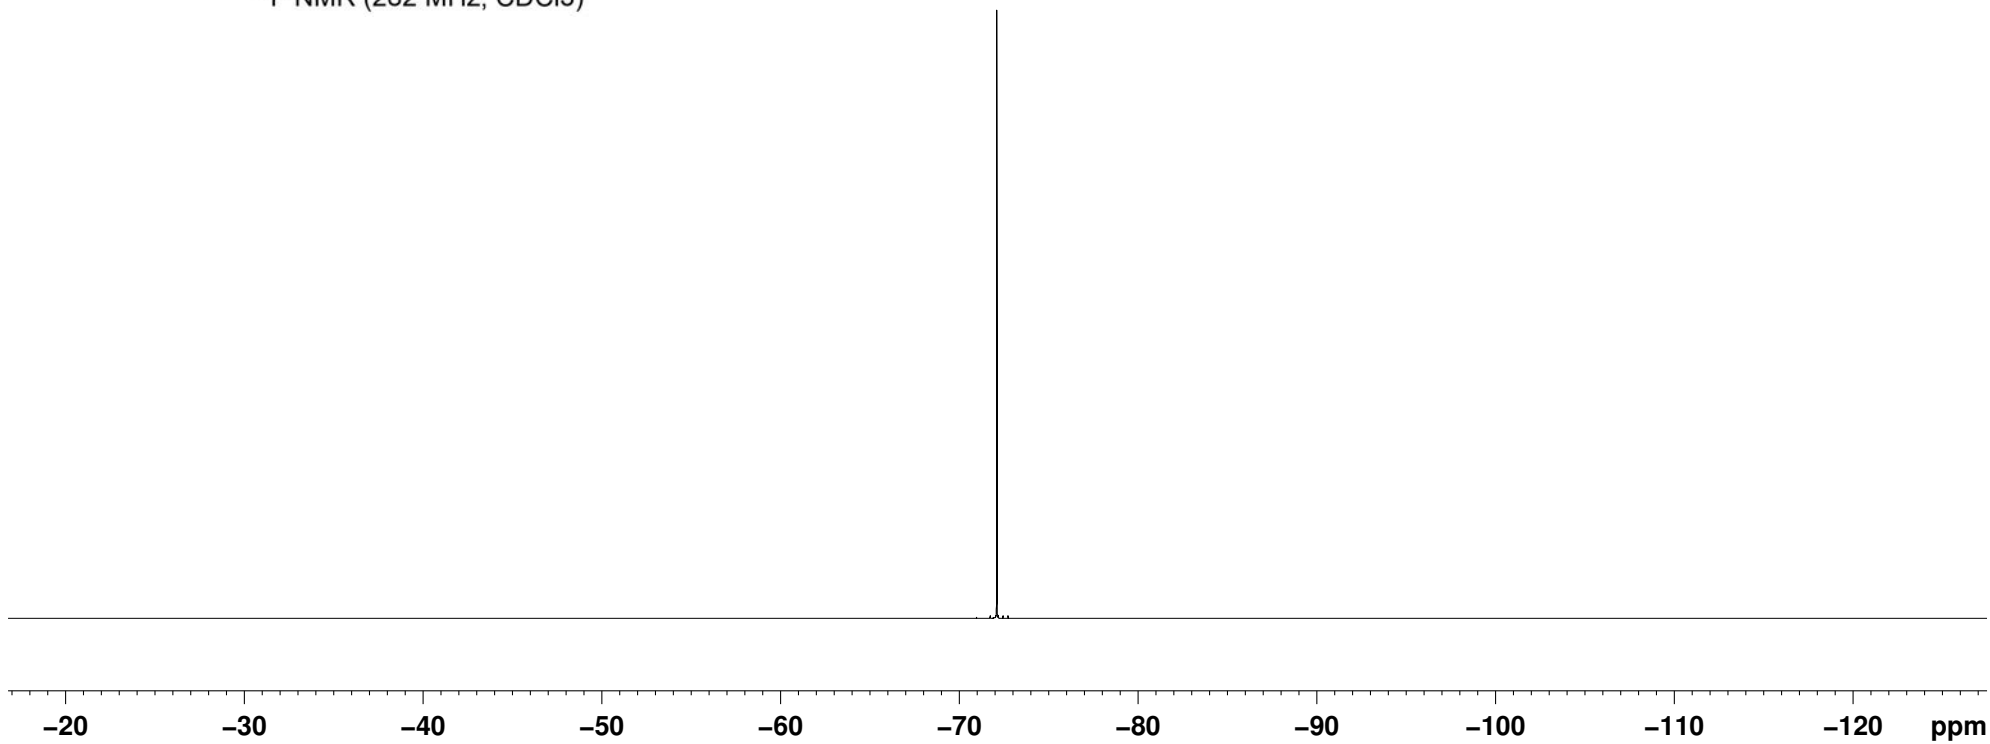

7.252  
7.242  
7.224  
7.214  
7.207  
7.194  
7.176  
7.169  
7.162  
7.158  
7.154  
7.150  
7.130  
7.105  
6.933  
6.924  
6.904  
6.896  
6.875  
6.867  
6.485  
6.471  
6.456  
6.443  
5.711  
5.678  
5.463  
5.439  
5.431  
5.415  
5.407  
5.382  
5.374  
5.358  
5.349  
5.325

3.413  
3.381

2.277

-0.000

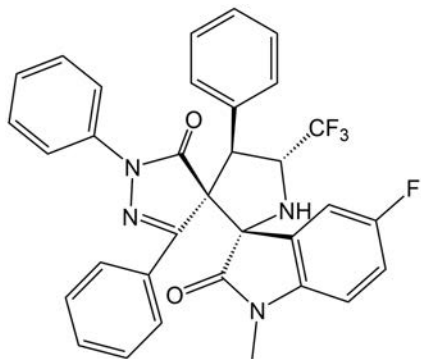

<sup>1</sup>H NMR (300 MHz, CDCl<sub>3</sub>)

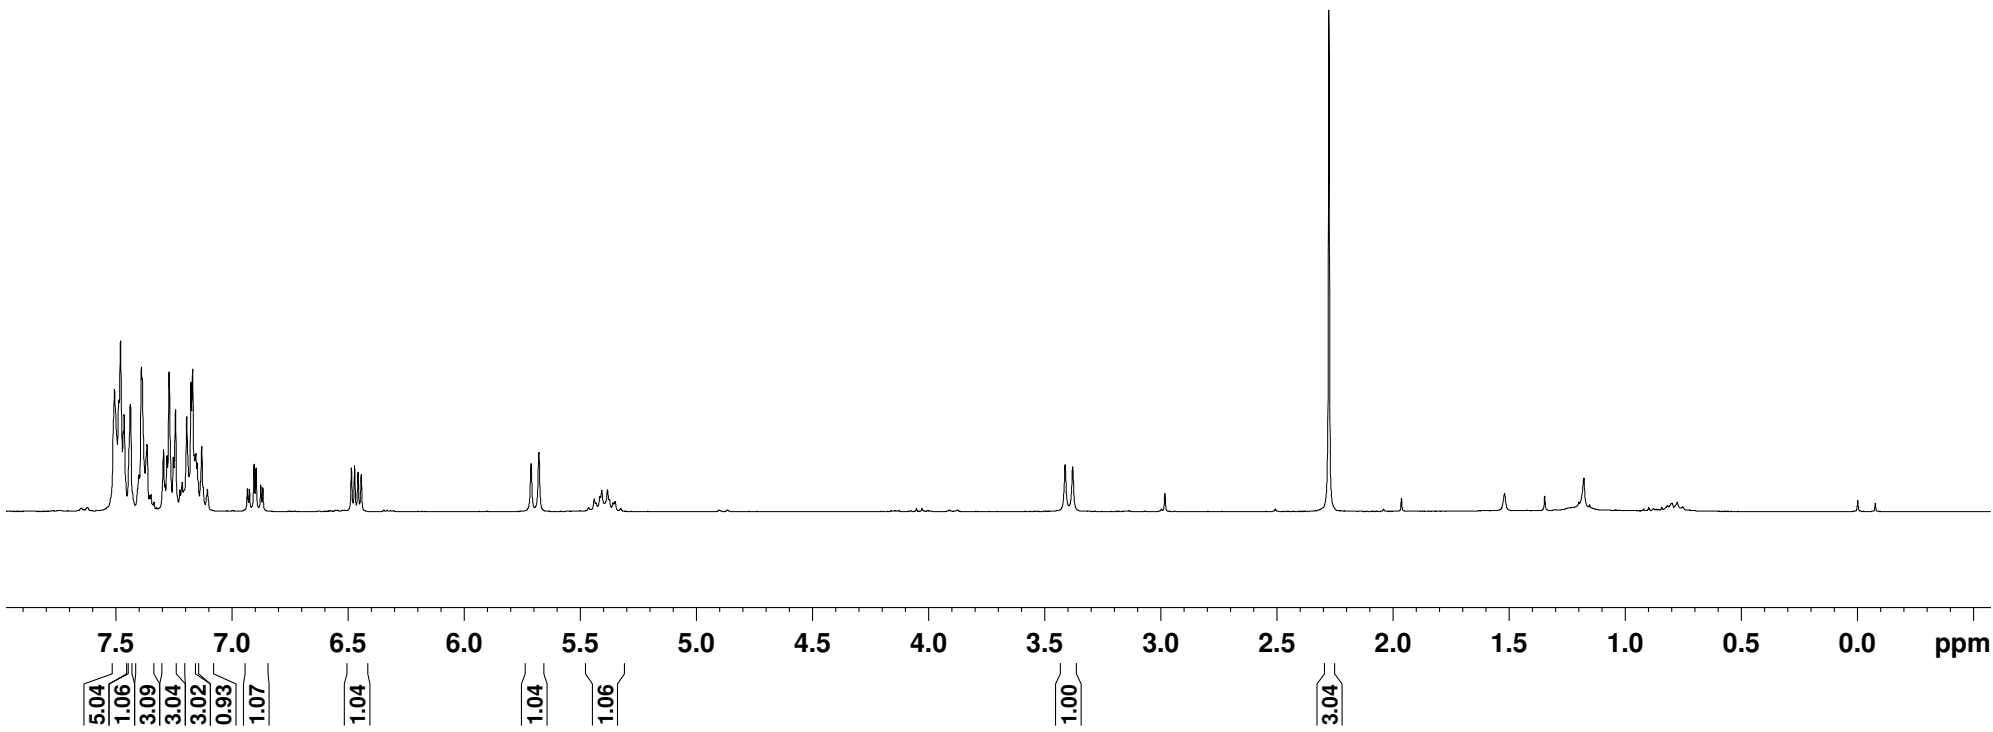



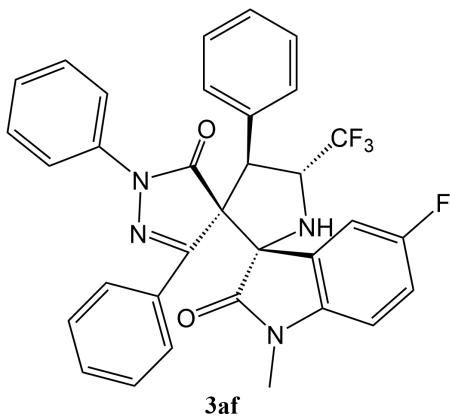

**3af**

$^{13}\text{C}$  NMR (100 MHz,  $\text{CDCl}_3$ )

172.67  
169.42  
159.14  
156.73  
153.75  
138.78  
138.76  
135.46  
131.45  
129.81  
129.42  
129.08  
127.92  
127.89  
127.70  
127.57  
127.40  
127.05  
126.29  
125.39  
123.51  
120.73  
119.10  
116.42  
116.18  
112.11  
111.85  
107.69  
107.61

76.32  
76.01  
75.69  
71.73  
69.29  
69.28  
60.93  
60.62  
60.32  
60.01

47.01

24.10

-0.00

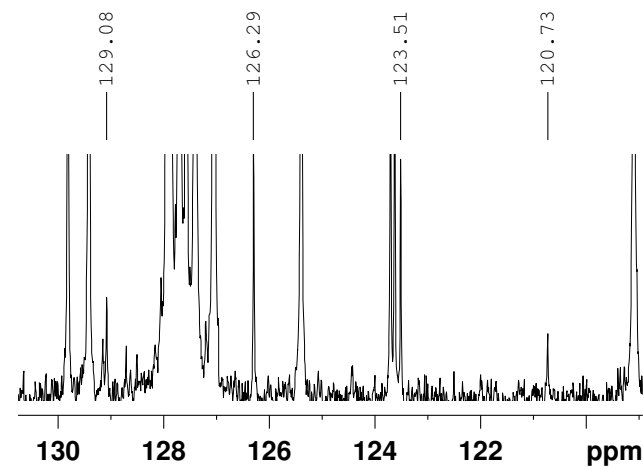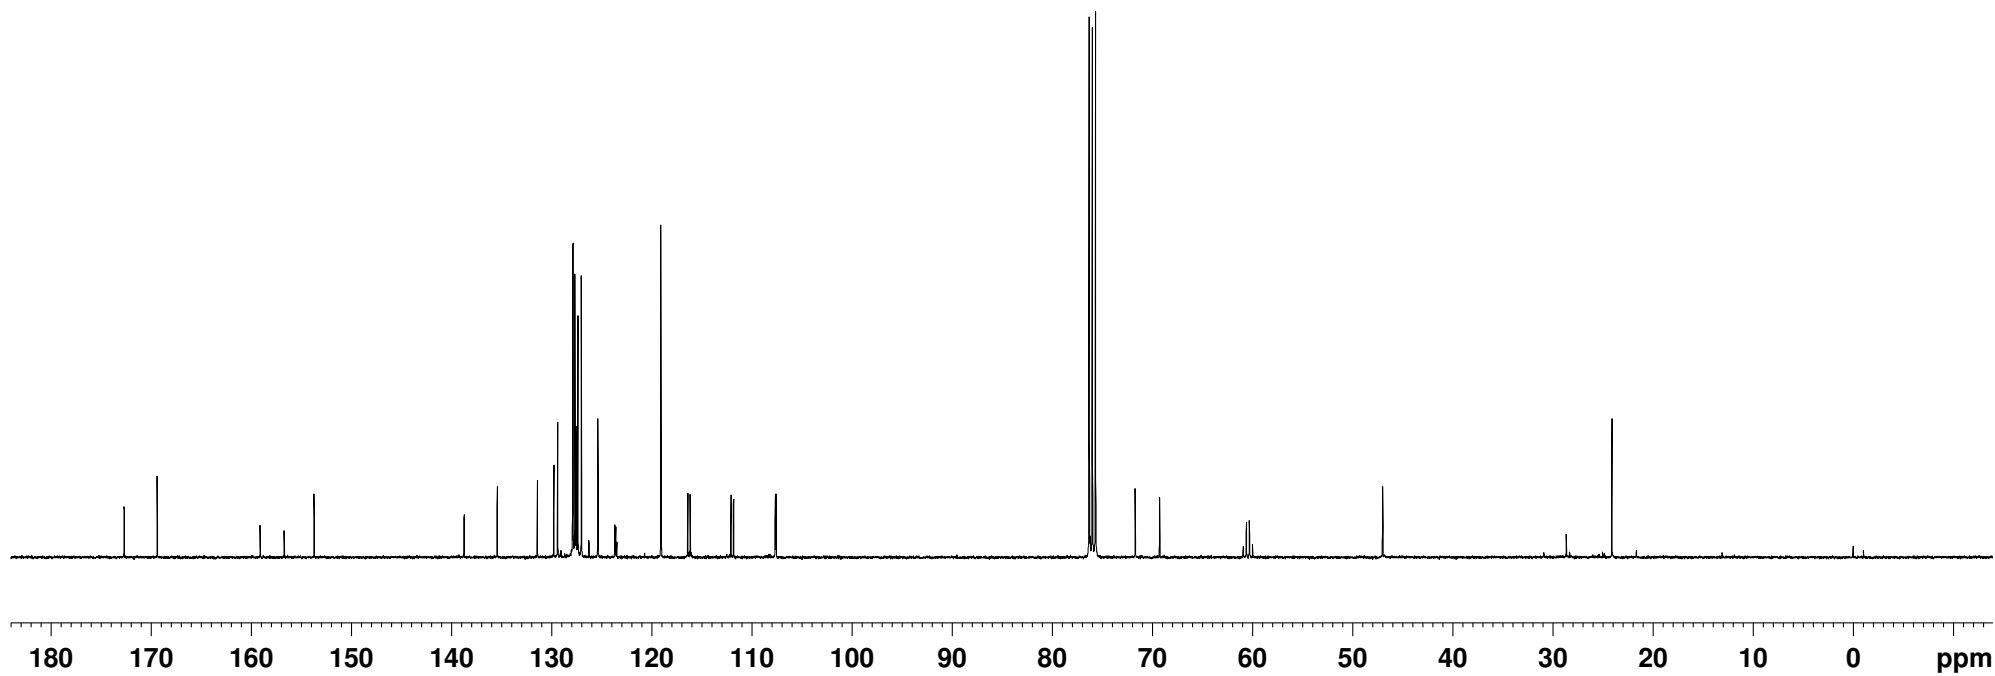

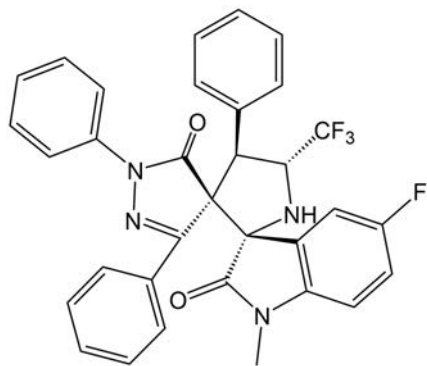

3af

<sup>19</sup>F NMR (282 MHz, CDCl<sub>3</sub>)

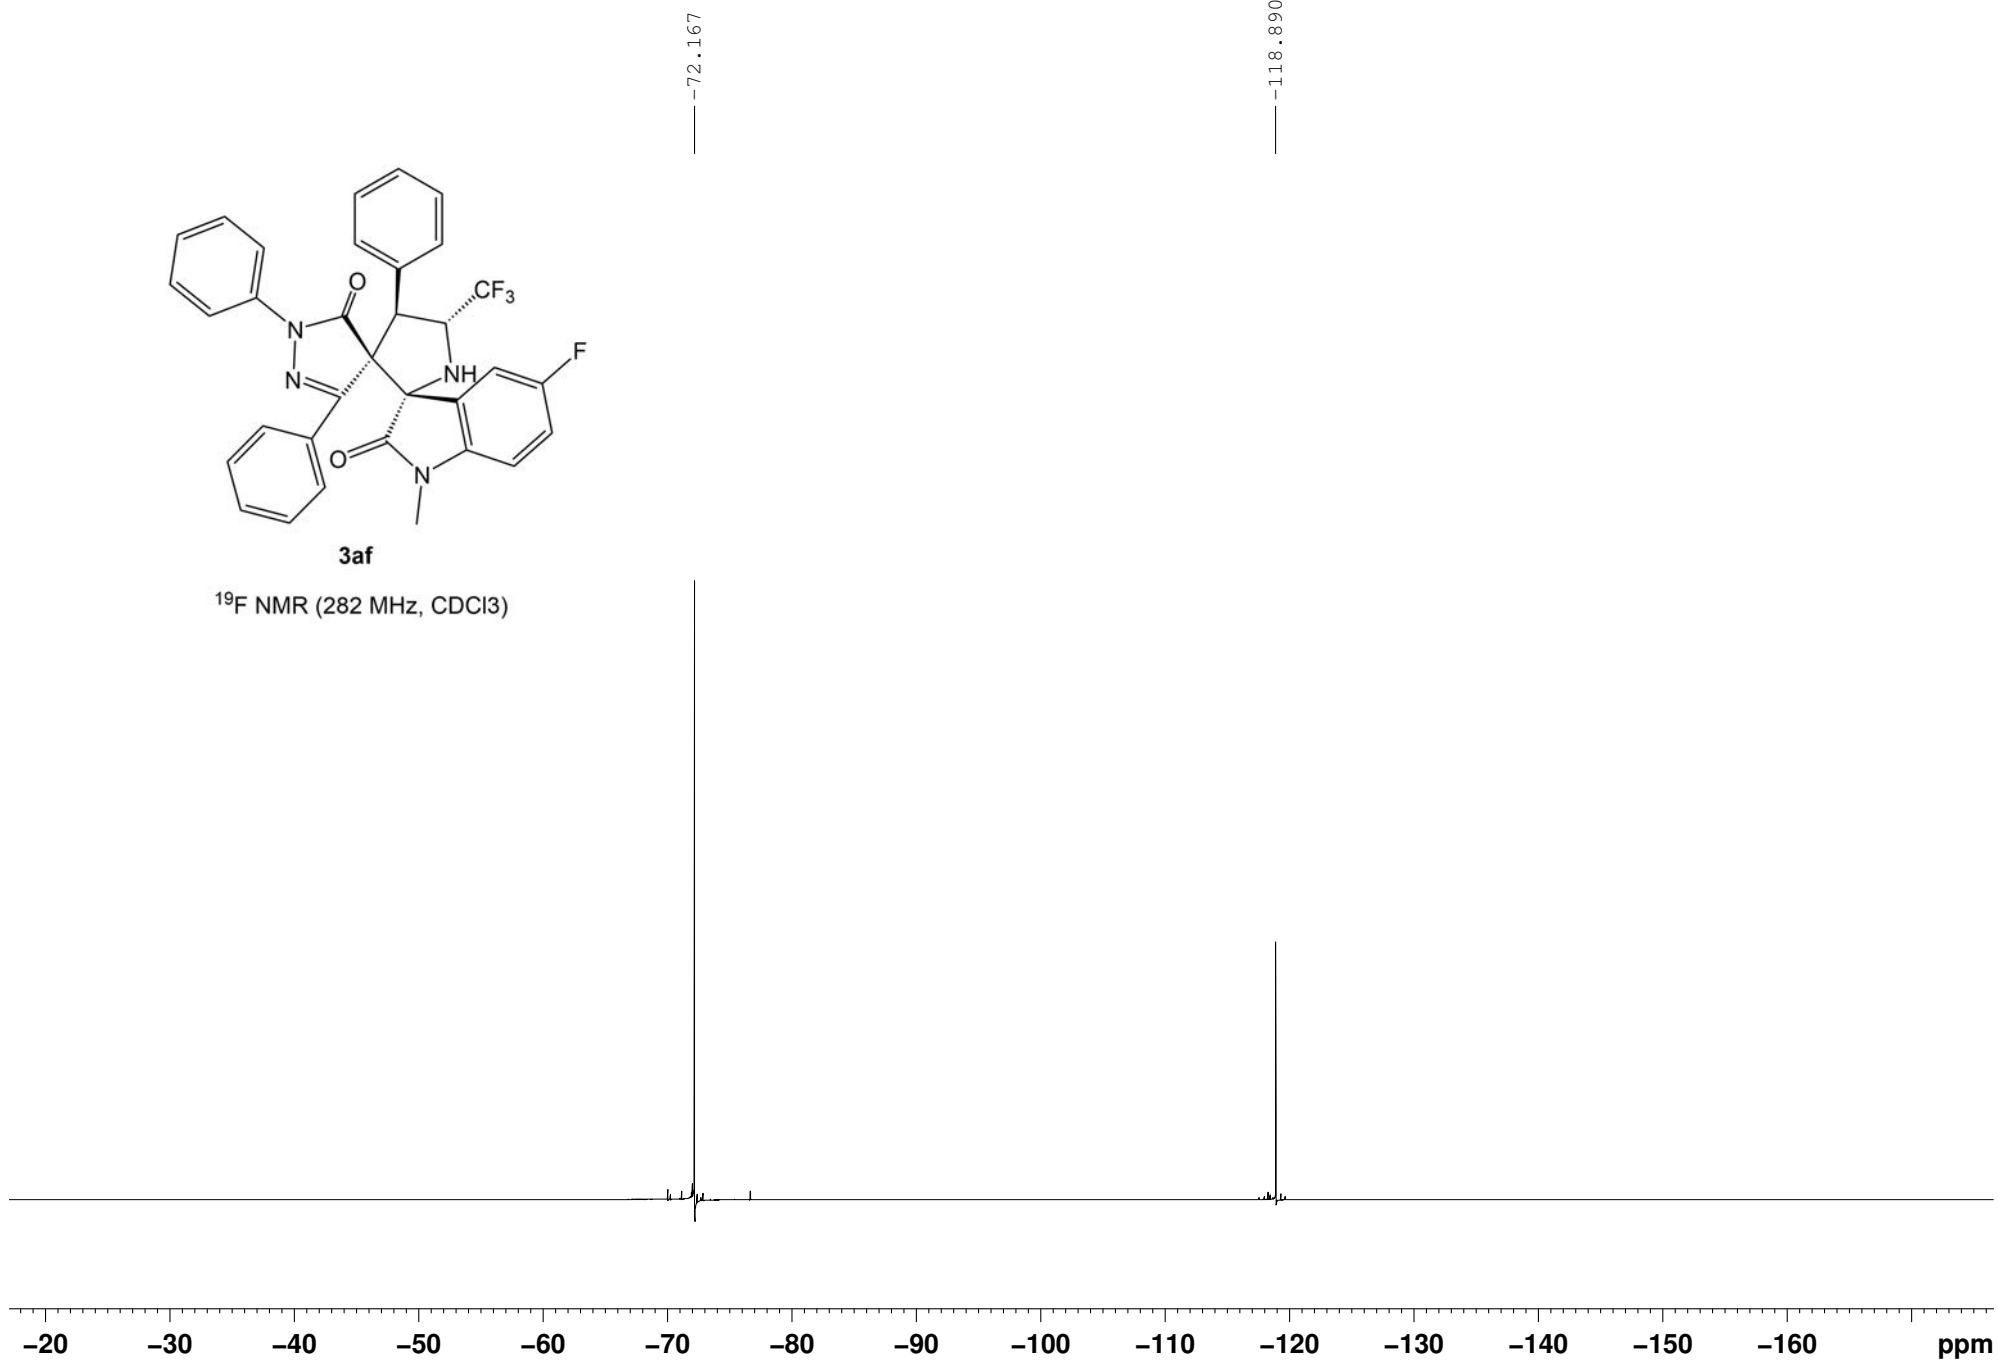

7.427  
7.422  
7.407  
7.396  
7.391  
7.355  
7.349  
7.329  
7.325  
7.303  
7.292  
7.284  
7.277  
7.262  
7.236  
7.230  
7.207  
7.183  
7.158  
7.033  
7.007  
6.490  
6.463  
5.824  
5.791  
5.552  
5.520  
5.495  
5.470  
5.463

3.529  
3.496

2.326  
2.111

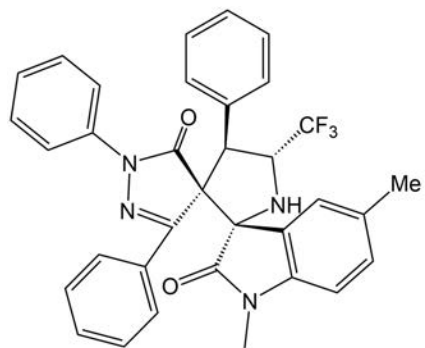

**3ag**

<sup>1</sup>H NMR (300 MHz, CDCl<sub>3</sub>)

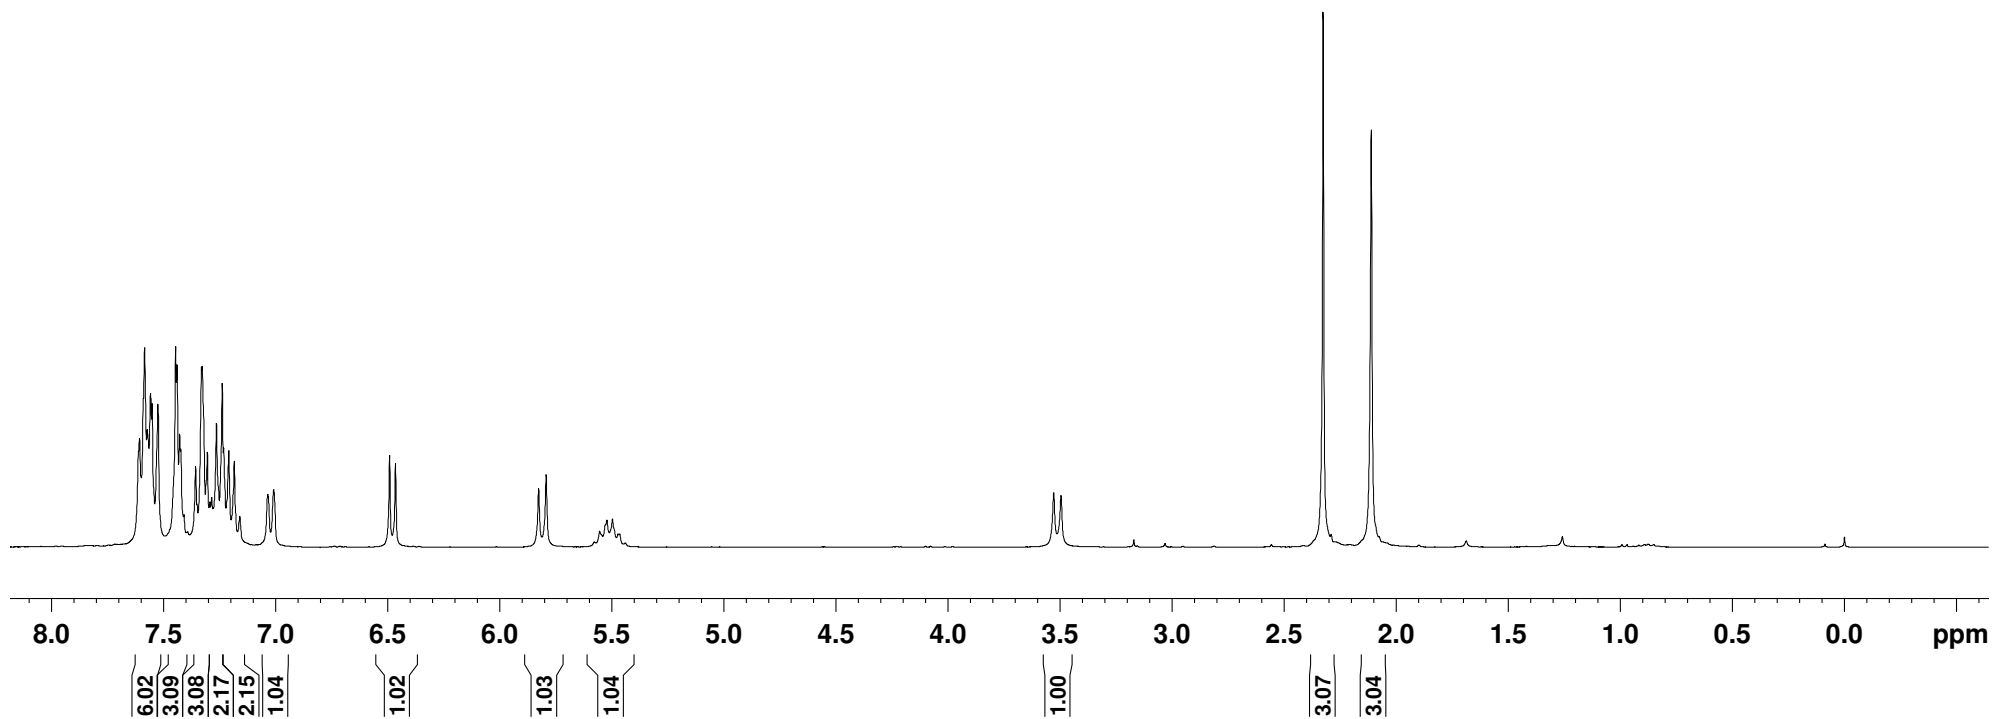

— 172.72  
 — 169.75  
 — 153.83  
 — 140.29  
 — 135.66  
 — 132.03  
 — 131.40  
 — 130.14  
 — 129.94  
 — 129.28  
 — 129.22  
 — 127.88  
 — 127.76  
 — 127.63  
 — 127.50  
 — 127.38  
 — 126.99  
 — 126.43  
 — 125.15  
 — 124.11  
 — 123.65  
 — 121.79  
 — 120.86  
 — 119.02  
 — 106.77

76.35  
 76.03  
 75.71  
 71.89  
 69.75  
 61.24  
 60.93  
 60.63  
 60.32  
 46.65  
 23.96  
 19.84

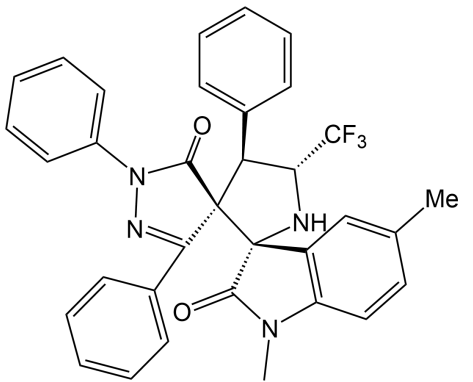

**3ag**

<sup>13</sup>C NMR (100 MHz, CDCl<sub>3</sub>)

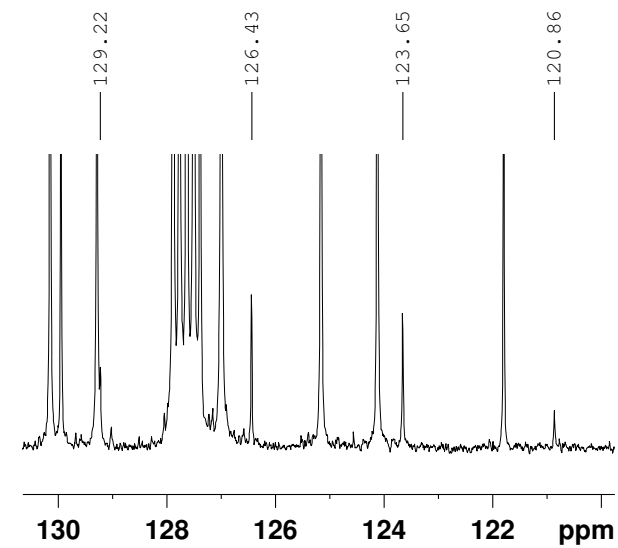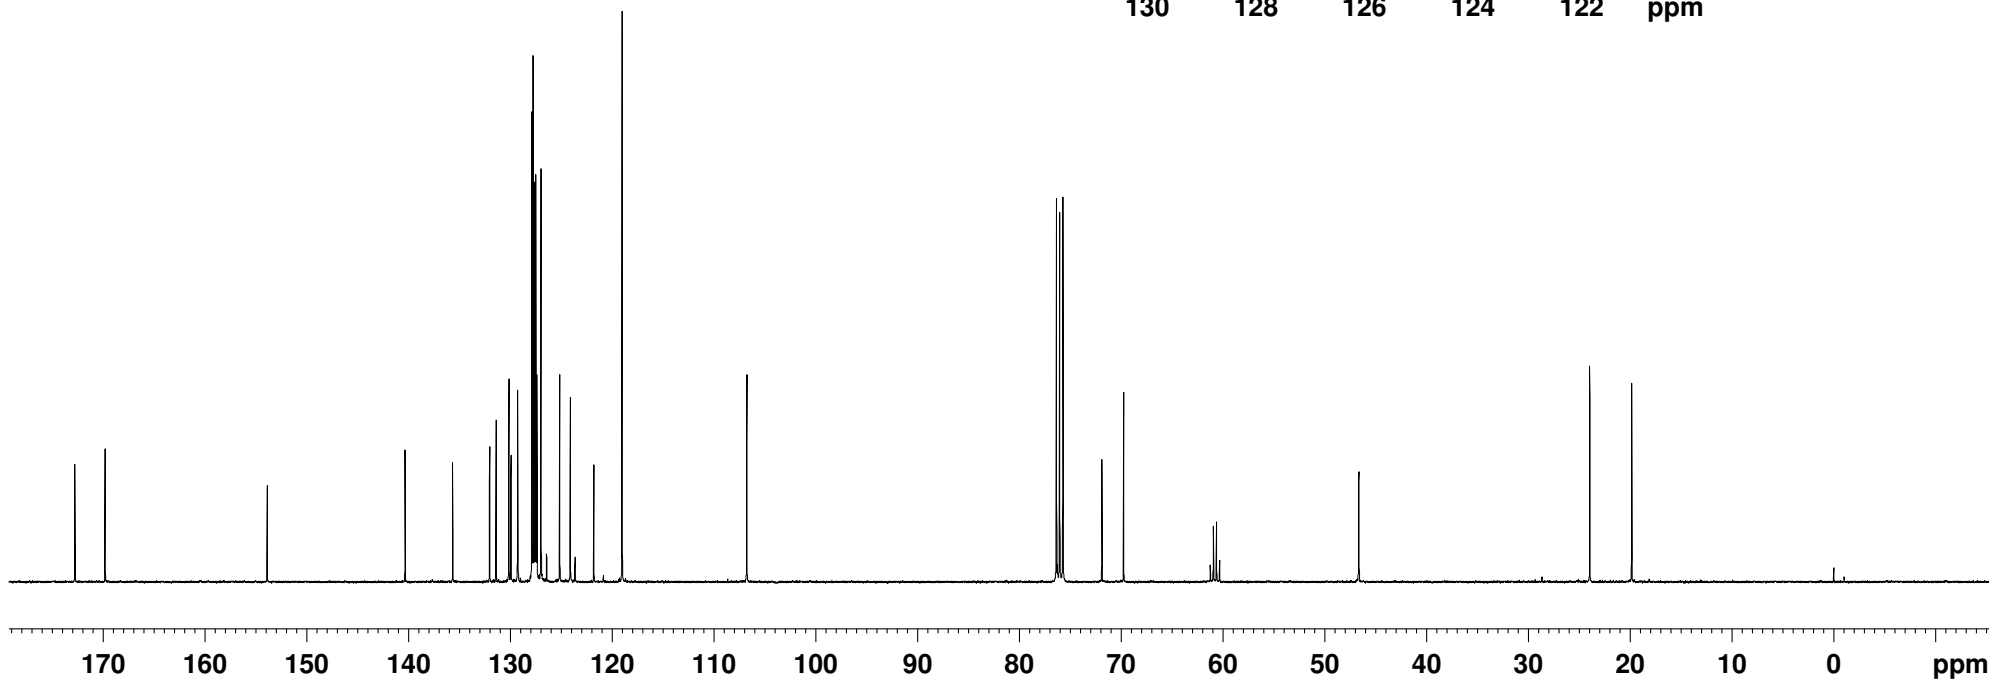

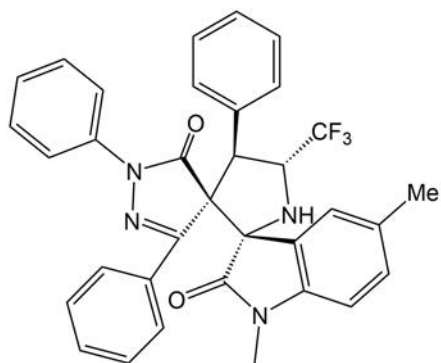

**3ag**

<sup>19</sup>F NMR (282 MHz, CDCl<sub>3</sub>)

— -71.963

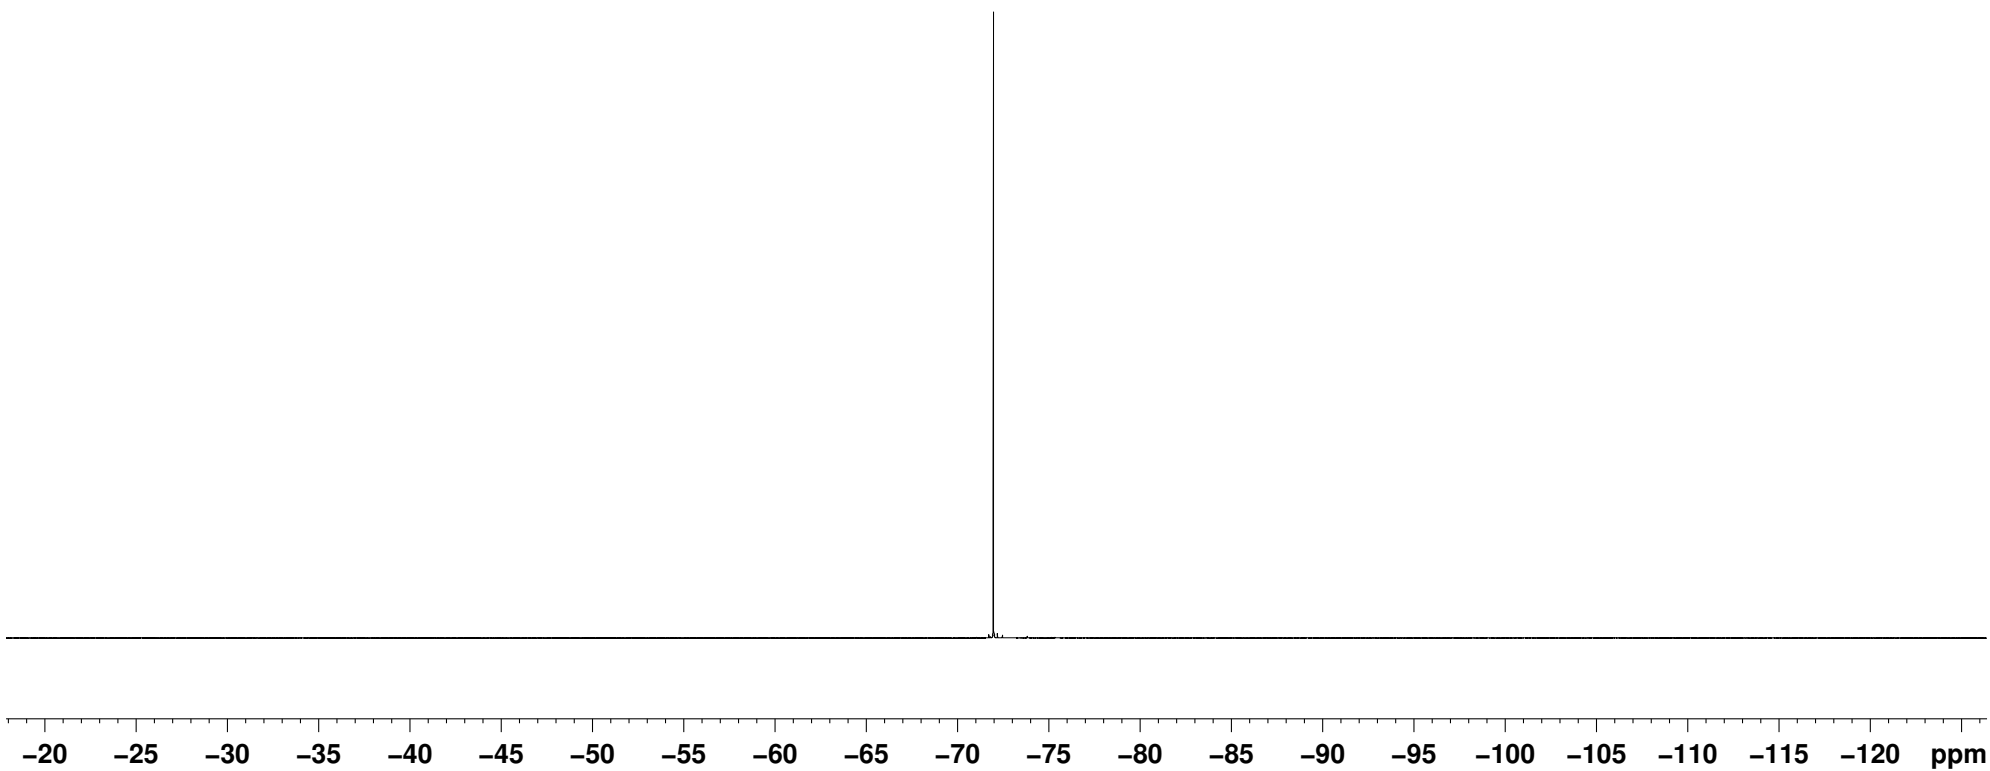

7.249  
7.222  
7.191  
7.188  
7.164  
7.139  
7.136  
7.127  
7.102  
7.085  
7.072  
7.065  
6.844  
6.820  
6.795  
6.706  
6.693  
6.685  
6.680  
6.676  
6.670  
6.663  
6.654  
6.529  
6.503  
5.708  
5.674  
5.448  
5.423  
5.416  
5.398  
5.390  
5.366  
5.341  
5.333  
5.308

3.580  
3.548  
3.519  
3.462  
3.430

— 2.275

— -0.000

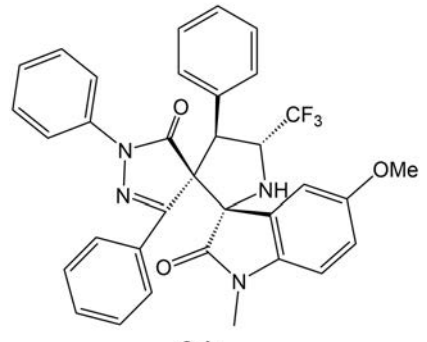

**3ah**  
<sup>1</sup>H NMR (300 MHz, CDCl<sub>3</sub>)

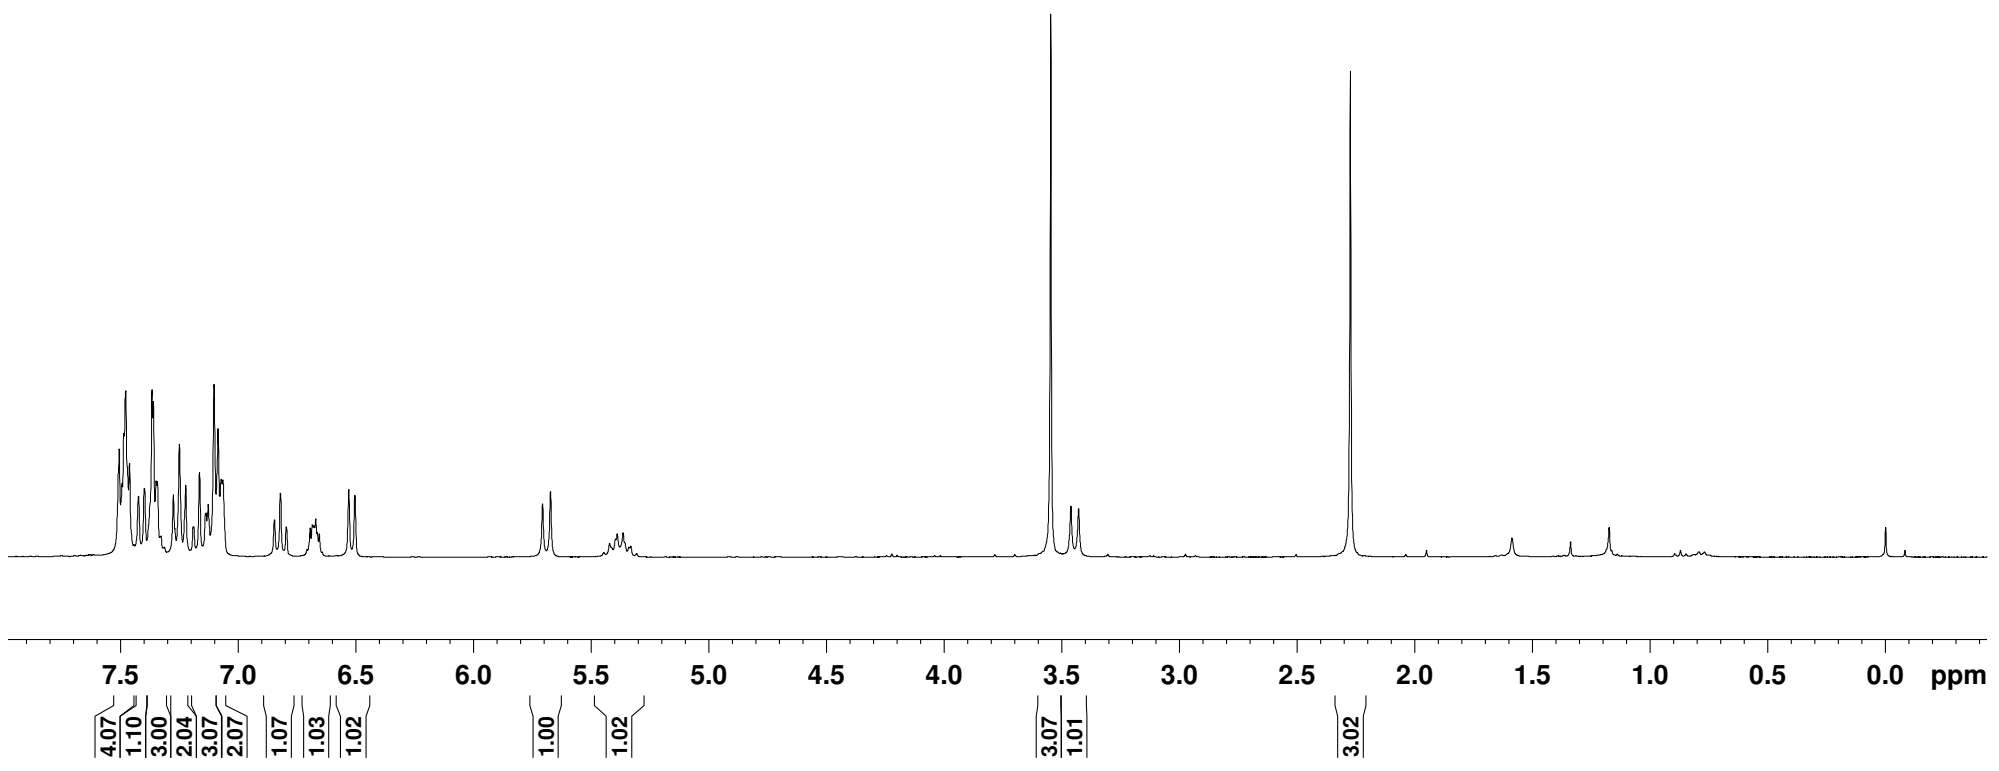

173.58  
170.72  
156.04  
155.00  
137.10  
136.73  
132.92  
130.97  
130.36  
130.23  
128.93  
128.84  
128.71  
128.50  
128.03  
127.45  
126.19  
124.66  
123.94  
121.88  
119.94  
116.38  
111.04  
108.68

77.38  
77.07  
76.75  
73.03  
70.80  
62.18  
61.87  
61.57  
61.26  
55.66  
47.88  
25.06  
0.02

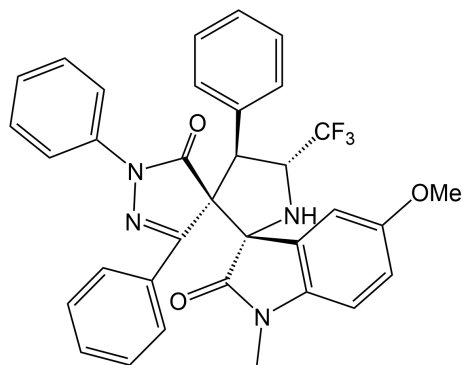

**3ah**  
<sup>13</sup>C NMR (100 MHz, CDCl<sub>3</sub>)

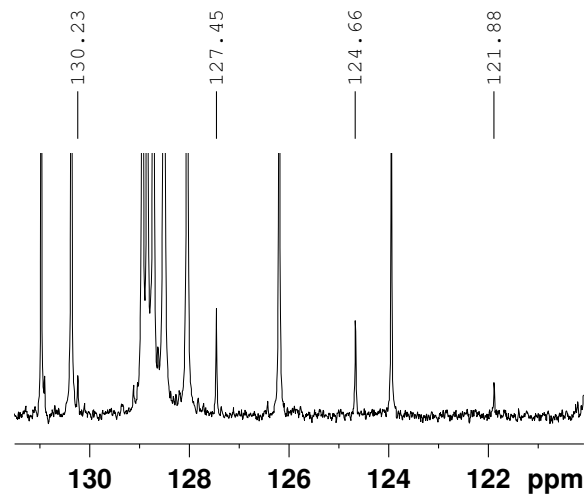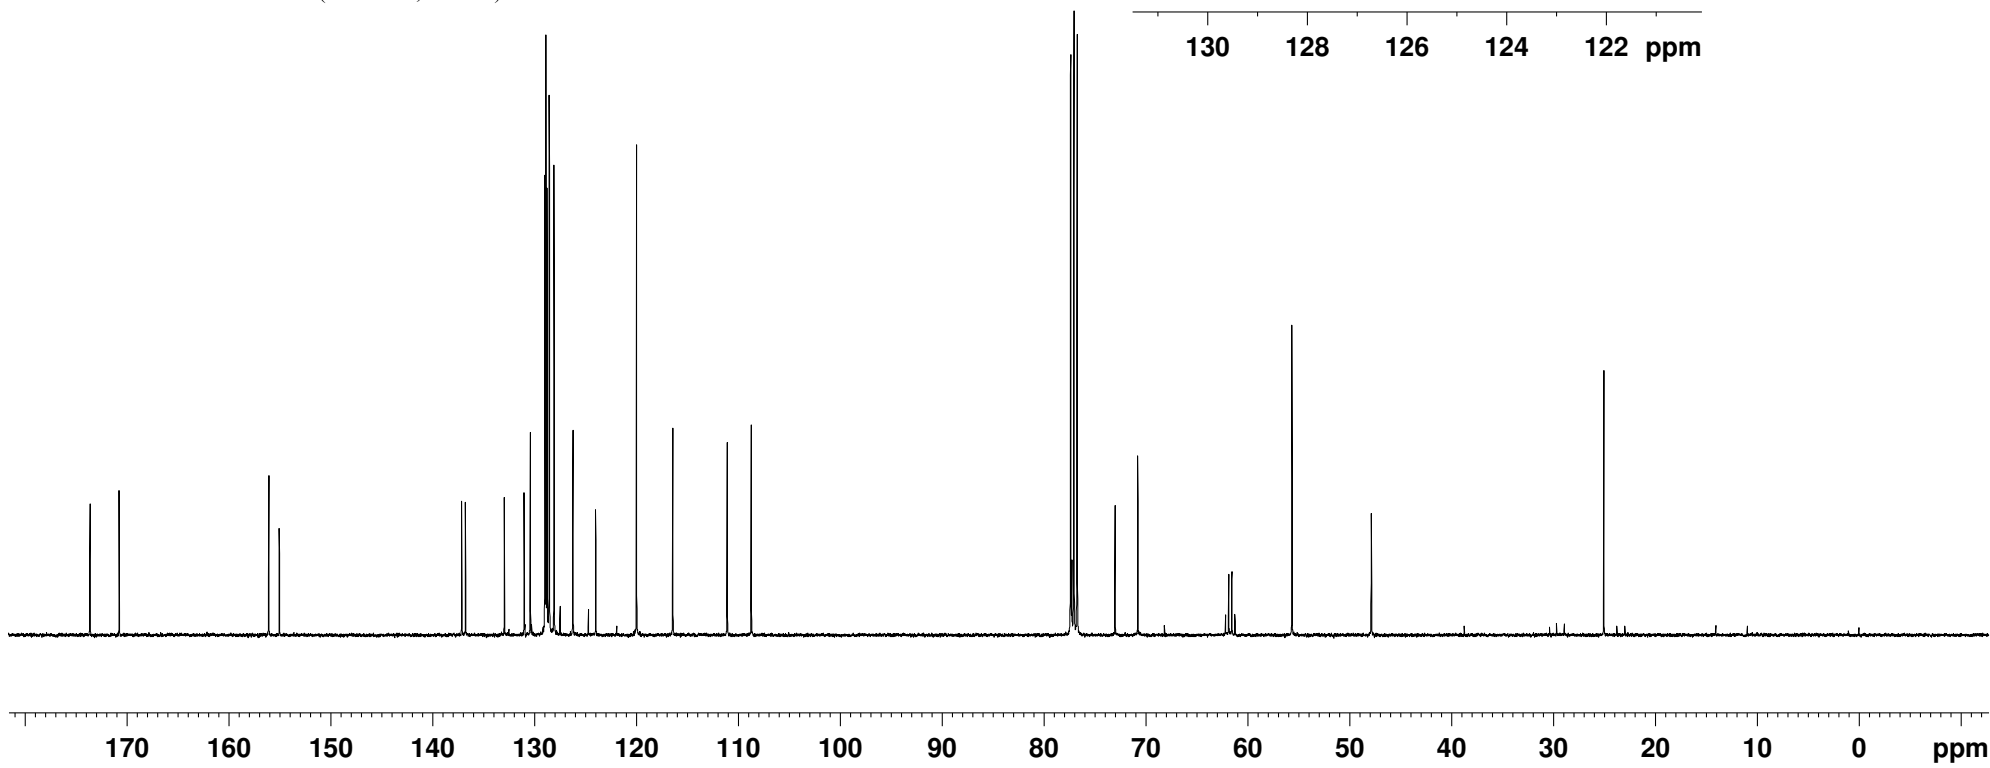

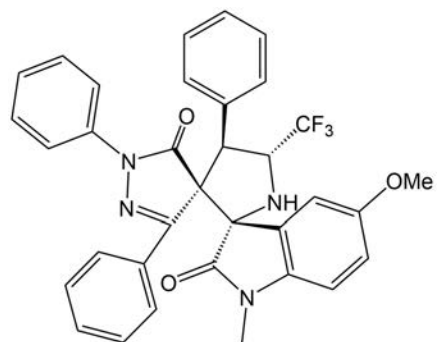

**3ah**

<sup>19</sup>F NMR (282 MHz, CDCl<sub>3</sub>)

— -72.006

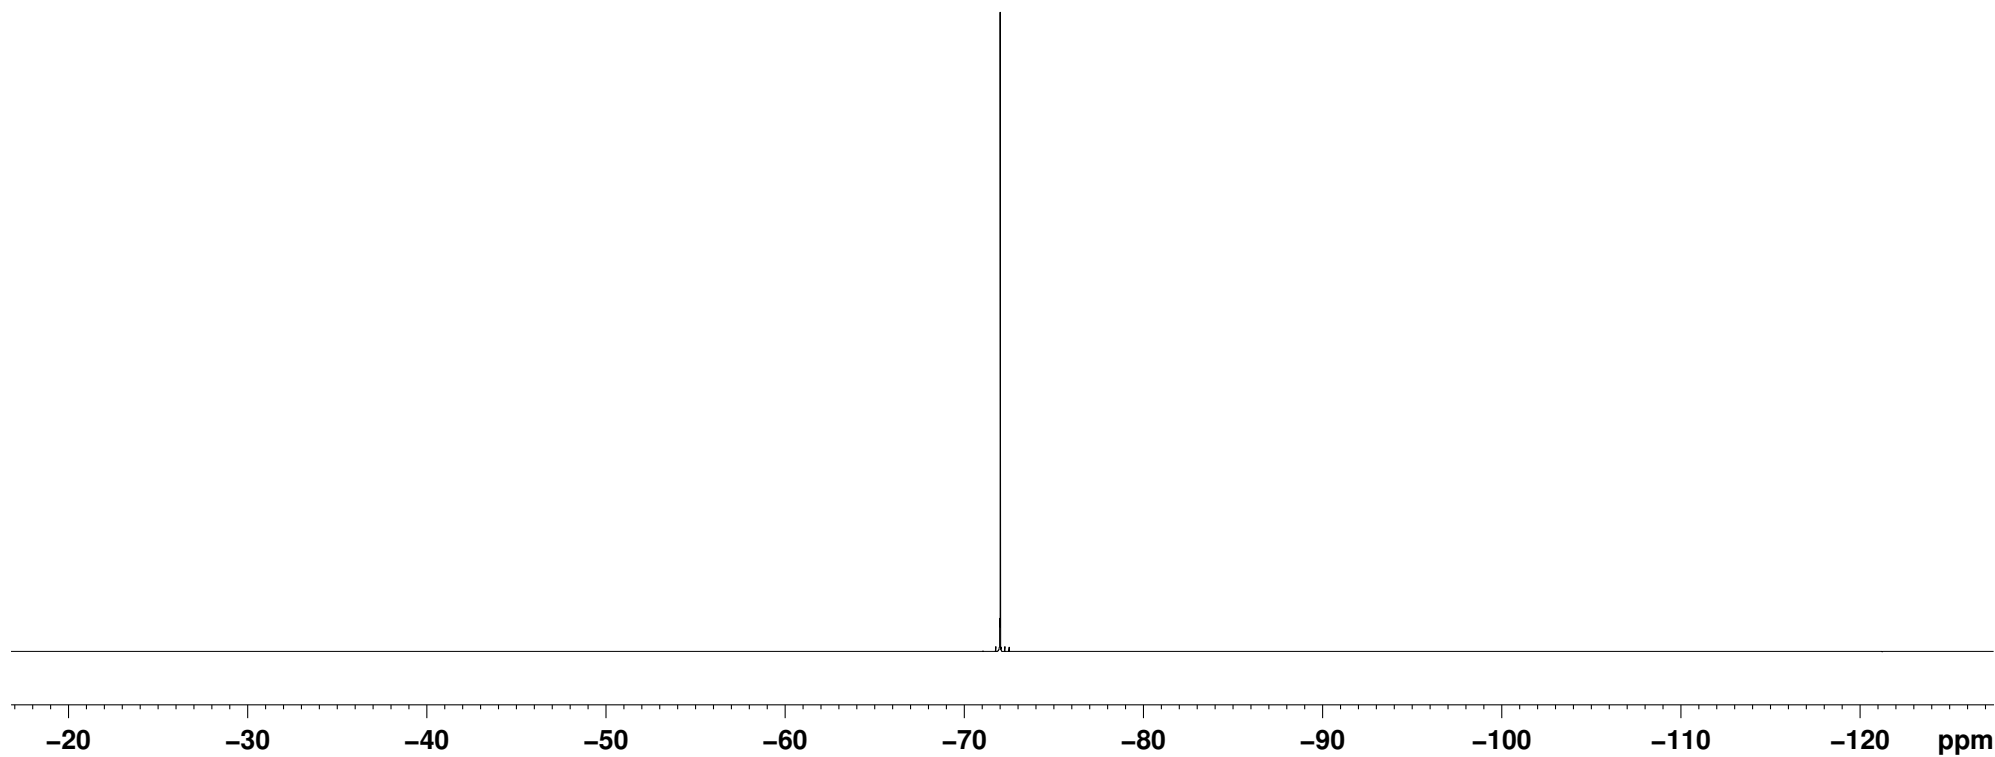



7.471  
7.453  
7.441  
7.436  
7.414  
7.408  
7.365  
7.341  
7.318  
7.297  
7.290  
7.271  
7.249  
7.228  
7.225  
7.205  
7.200  
7.178  
7.178  
6.906  
6.900  
6.879  
6.873  
6.611  
5.768  
5.735  
5.544  
5.519  
5.493  
5.463  
5.437  
5.411

3.500  
3.469

2.344

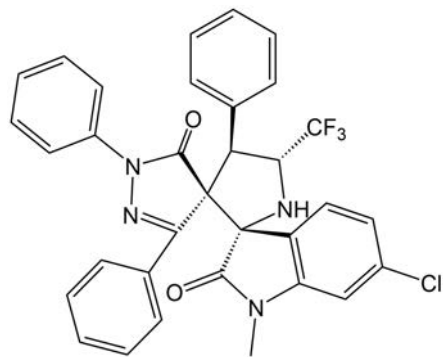

**3ai**

<sup>1</sup>H NMR (300 MHz, CDCl<sub>3</sub>)

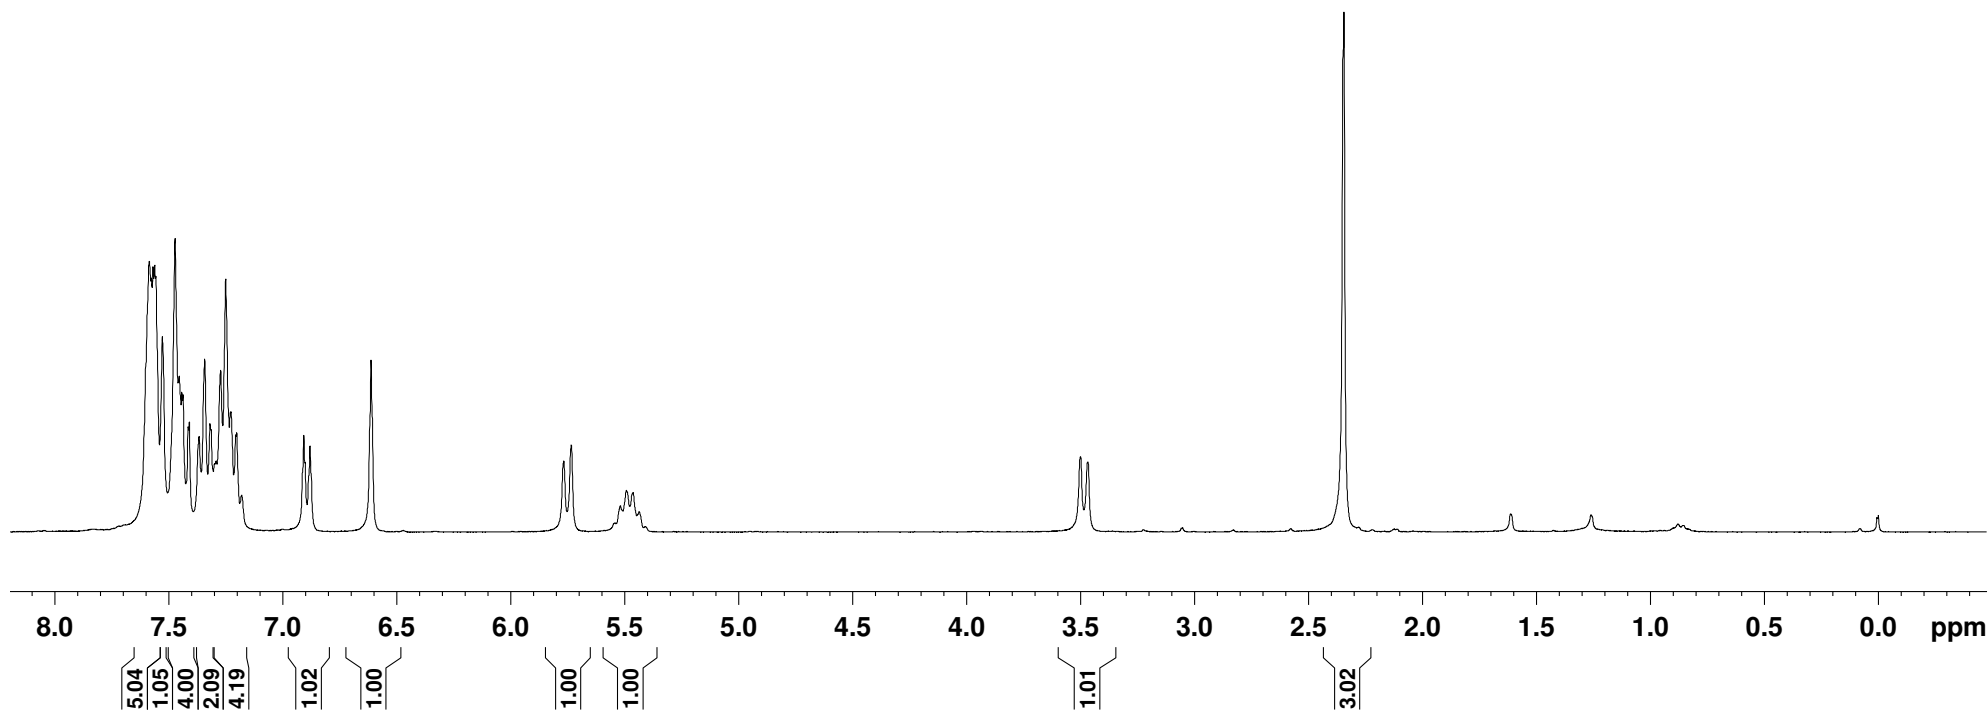

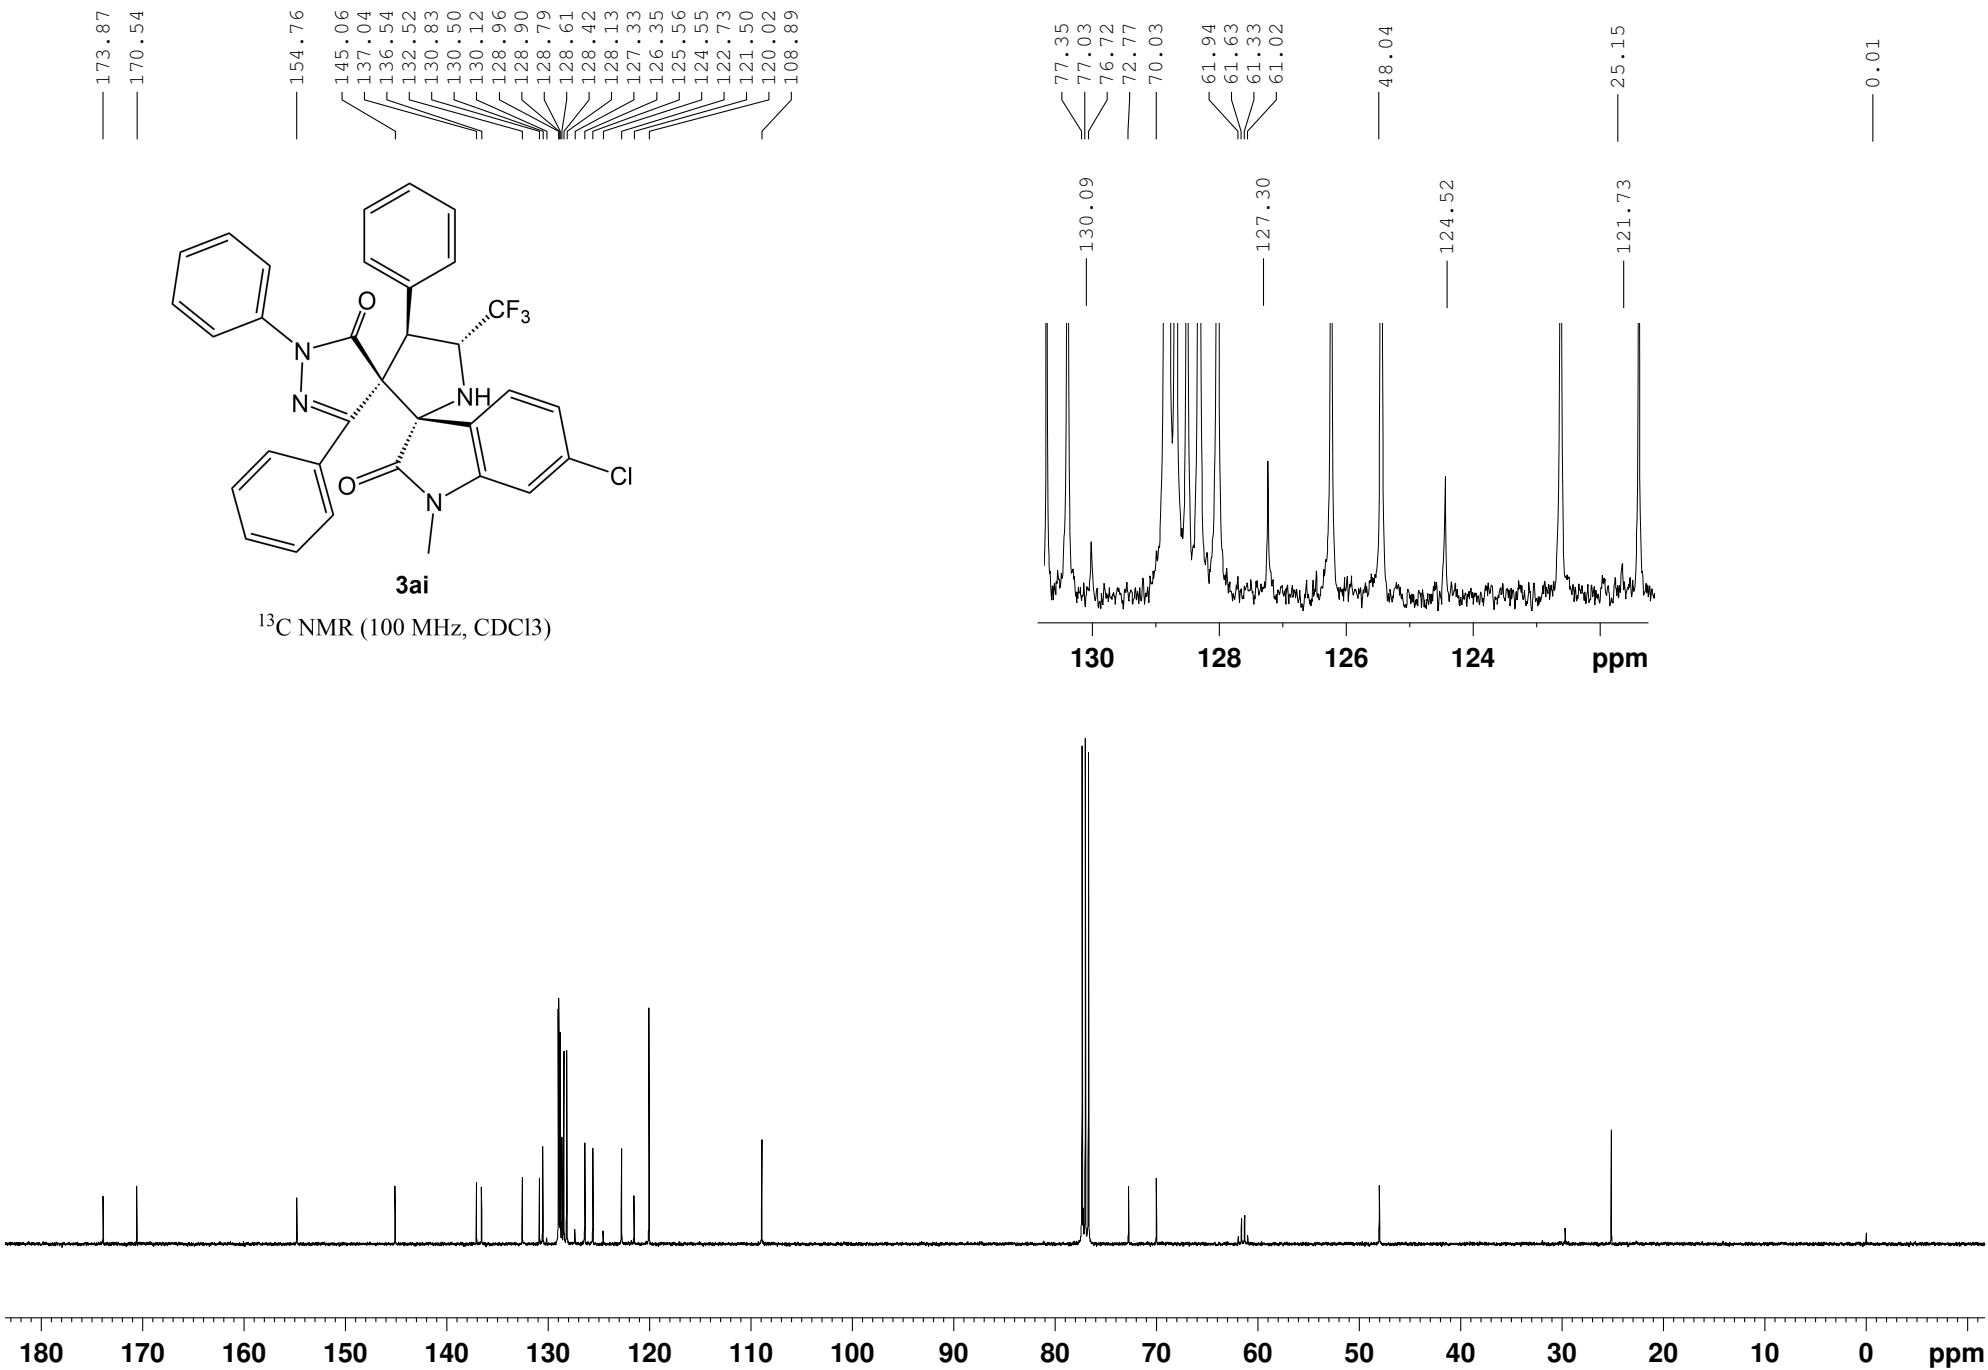

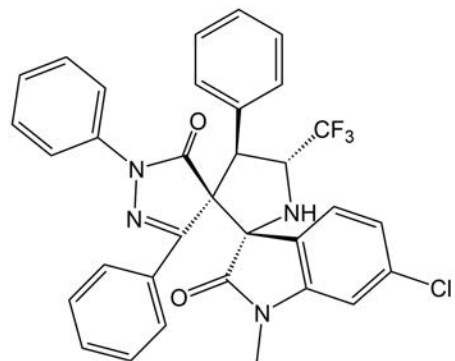

**3ai**

<sup>19</sup>F NMR (282 MHz, CDCl<sub>3</sub>)

— -72.206

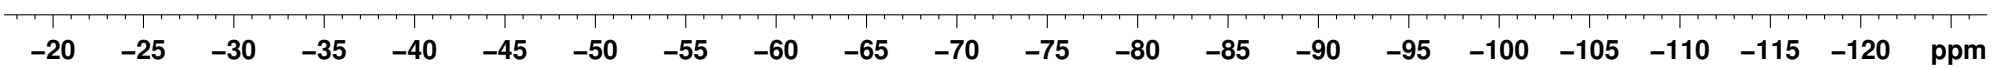

7.418  
7.414  
7.375  
7.360  
7.347  
7.335  
7.307  
7.293  
7.284  
7.264  
7.239  
7.218  
7.193  
7.169  
7.059  
7.053  
7.032  
7.026  
6.757  
6.751  
5.767  
5.734  
5.544  
5.520  
5.495  
5.488  
5.463  
5.438  
5.431  
5.406

3.501  
3.469

2.336

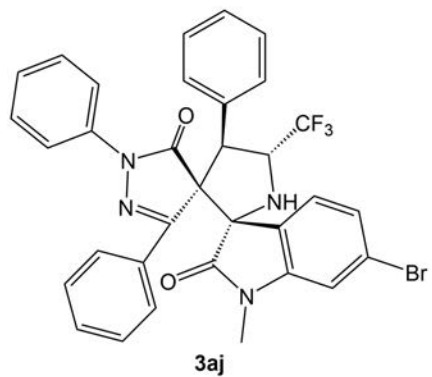

<sup>1</sup>H NMR (300 MHz, CDCl<sub>3</sub>)

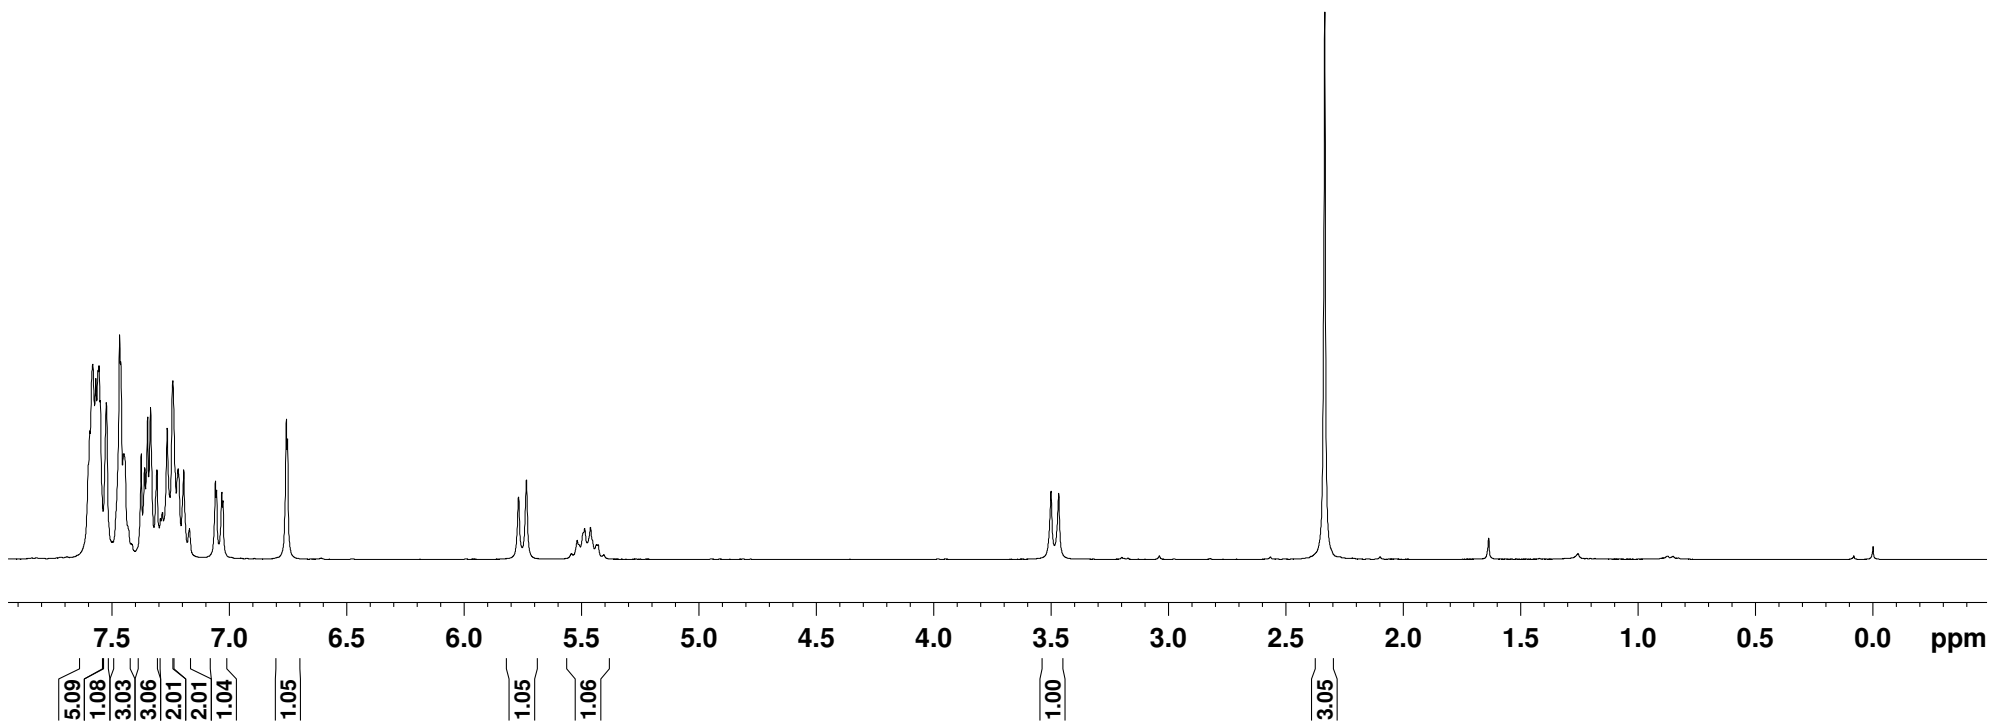

172.71  
169.46

153.71

144.05  
135.47  
131.44  
129.75  
129.46  
129.09  
127.91  
127.85  
127.74  
127.57  
127.37  
127.08  
126.30  
125.30  
124.79  
124.64  
123.98  
123.52  
121.01  
120.73  
118.96  
110.63

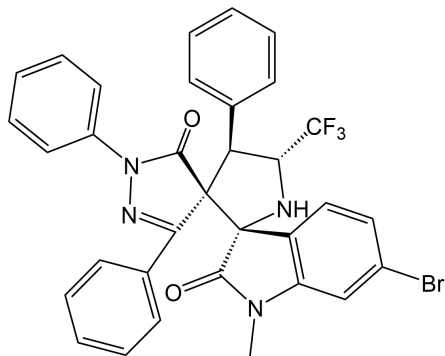

**3aj**

<sup>13</sup>C NMR (100 MHz, CDCl<sub>3</sub>)

76.35  
76.03  
75.71  
71.65

60.88  
60.57  
60.27  
59.96

47.00

24.10

129.09

126.30

123.52

120.73

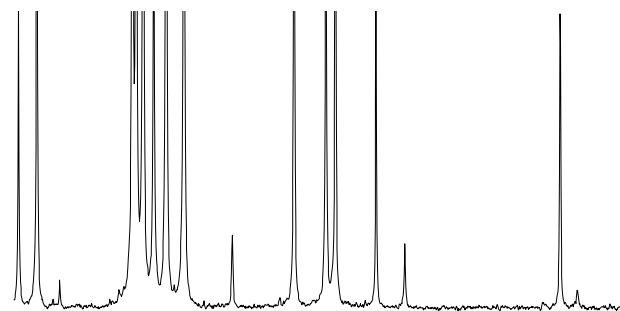

128 126 124 122 ppm

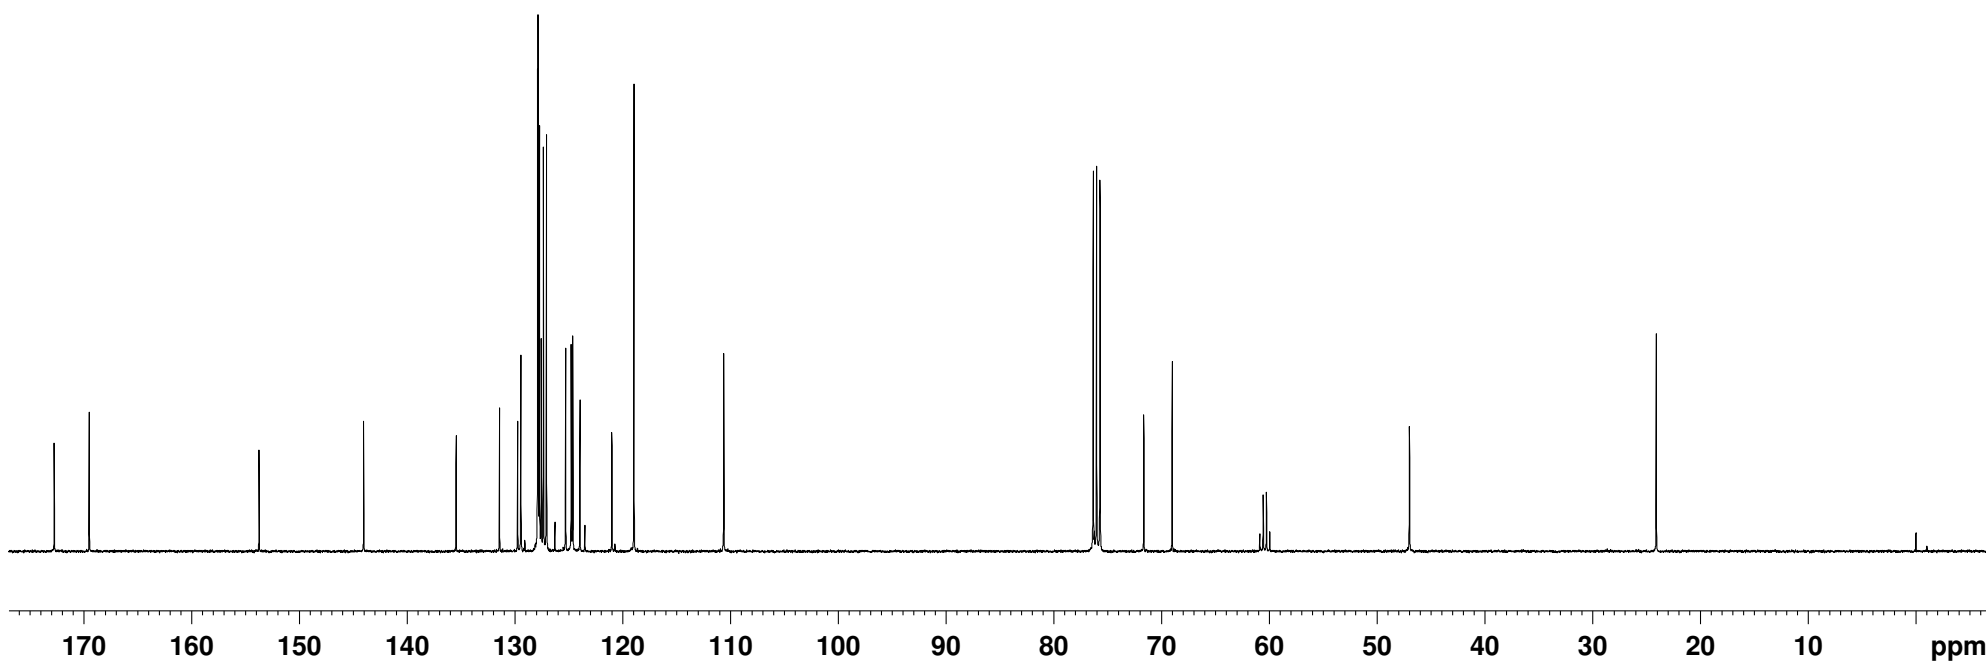

ppm

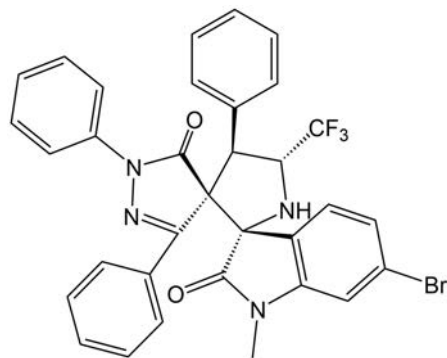

**3aj**

<sup>19</sup>F NMR (282 MHz, CDCl<sub>3</sub>)

— -72.113

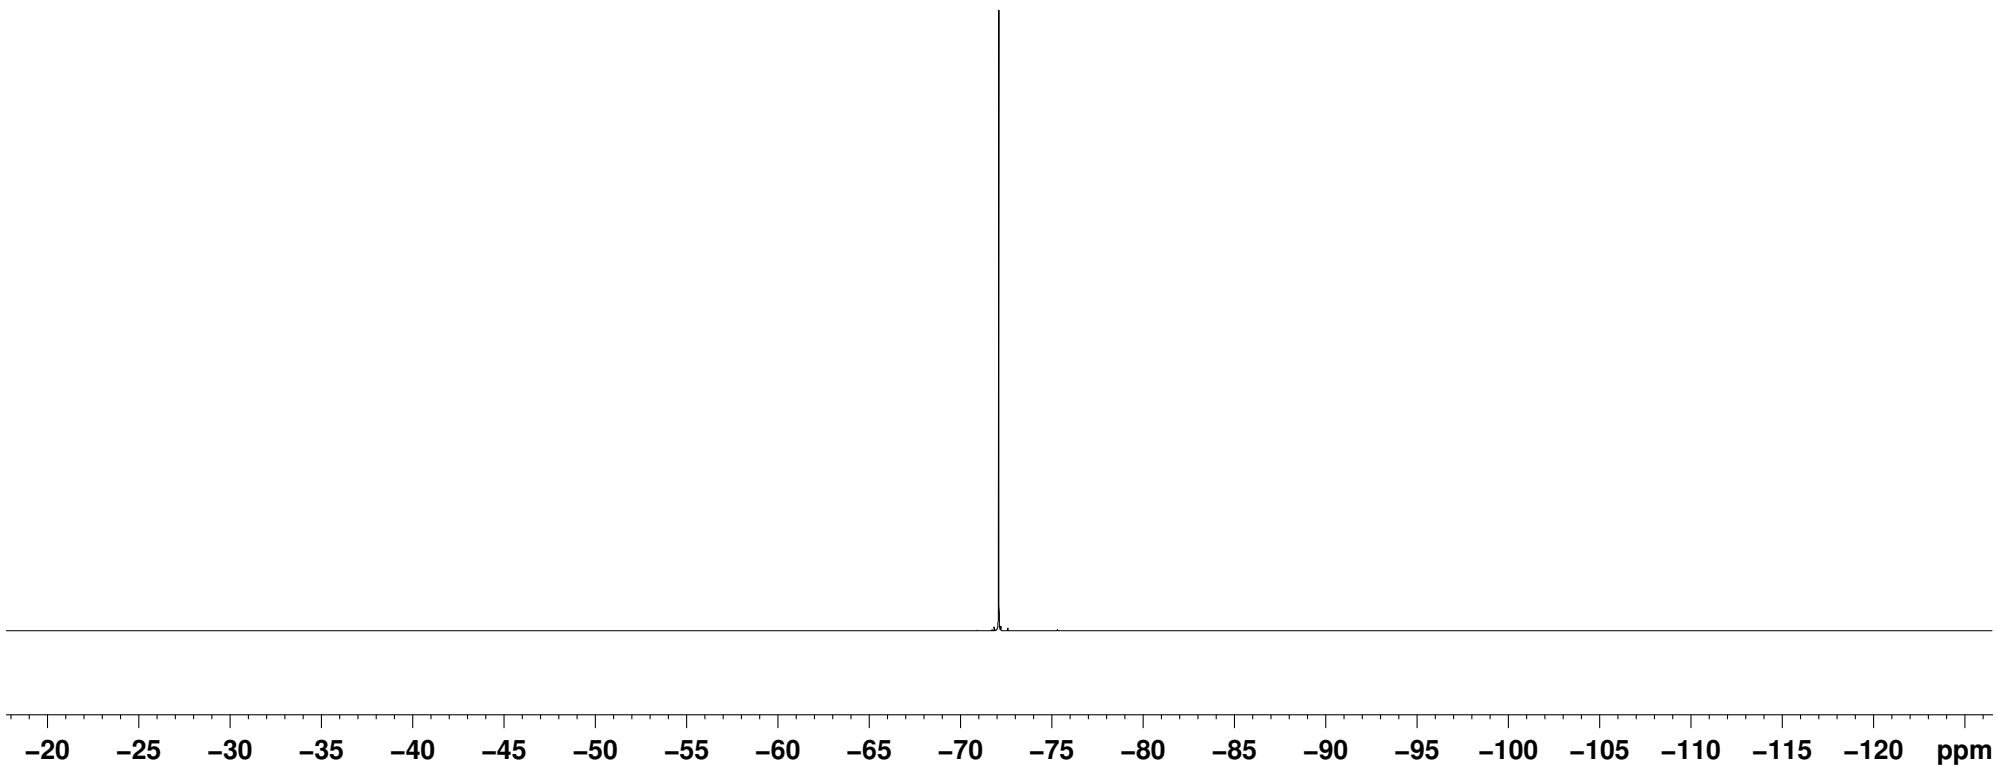

7.472  
7.463  
7.368  
7.365  
7.341  
7.318  
7.291  
7.283  
7.262  
7.244  
7.237  
7.221  
7.209  
7.205  
7.180  
7.166  
7.159  
7.156  
6.907  
6.901  
6.883  
6.878  
6.770  
6.743  
6.717  
5.779  
5.745  
5.613  
5.576  
5.551  
5.520  
5.495  
5.470  
5.463  
5.438

3.473  
3.441  
3.241  
3.231  
3.211  
3.196  
2.719  
0.000

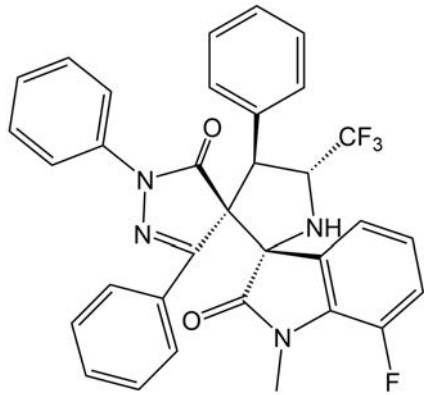

**3ak**

<sup>1</sup>H NMR (300 MHz, CDCl<sub>3</sub>)

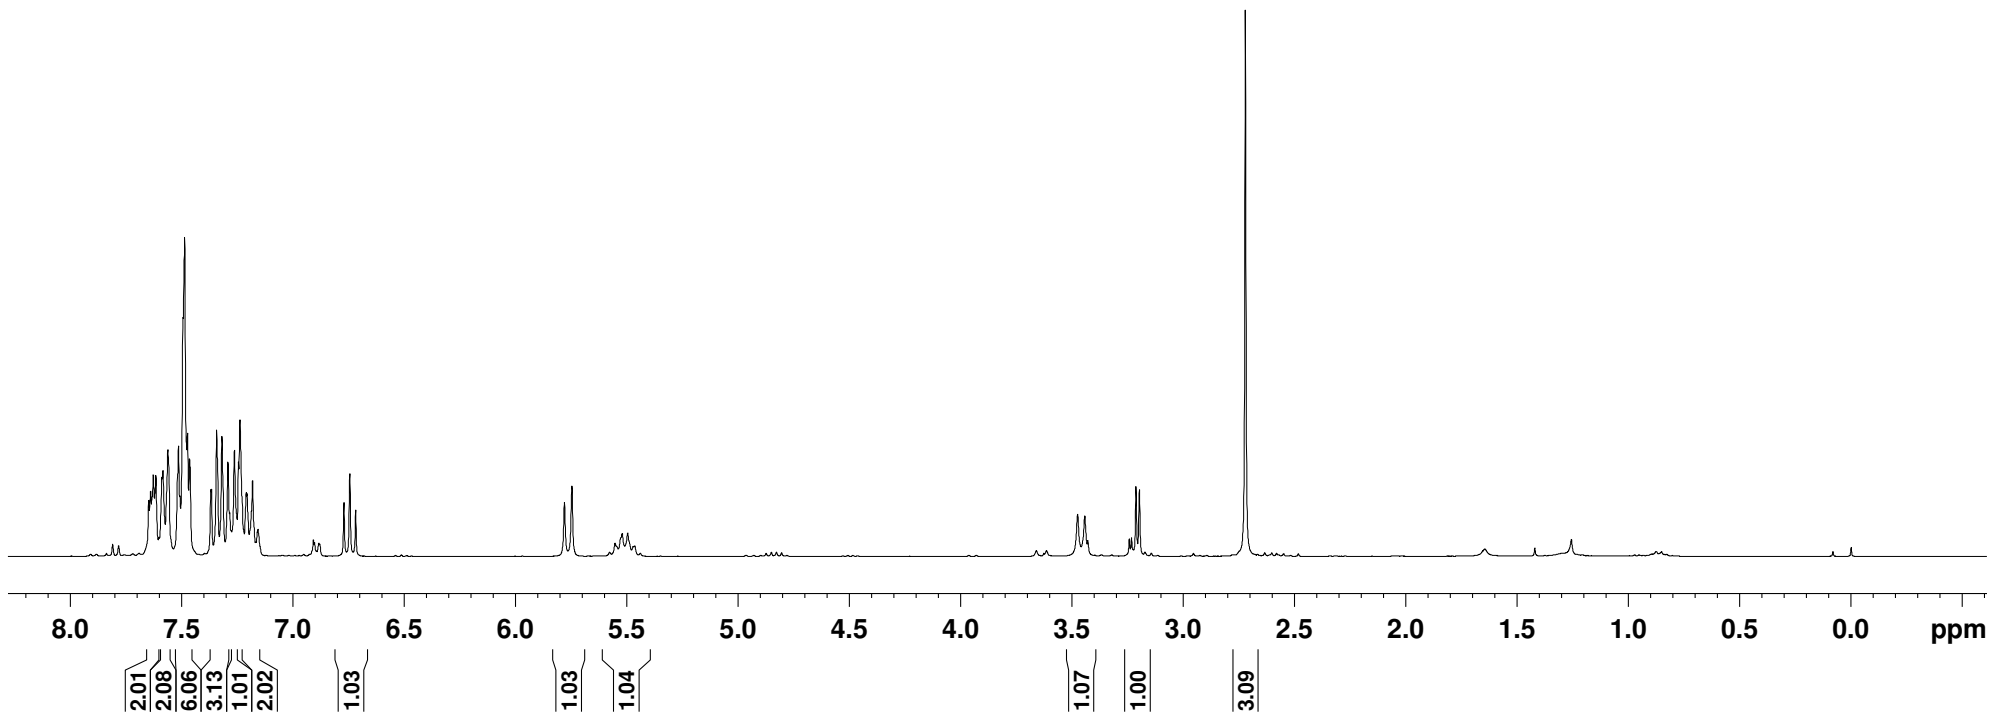

173.66  
170.47  
154.74  
148.55  
146.12  
136.59  
132.62  
130.89  
130.56  
130.21  
128.97  
128.88  
128.82  
128.60  
128.51  
128.22  
127.43  
126.32  
126.02  
126.00  
124.64  
123.41  
123.35  
121.86  
120.40  
120.37  
120.07  
119.18  
118.99

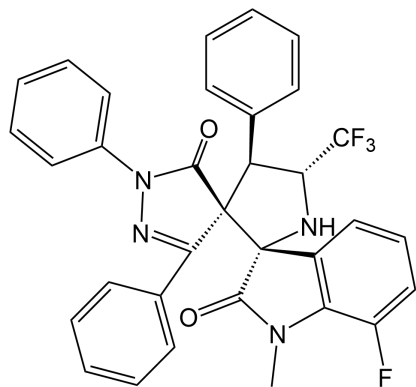

**3ak**

$^{13}\text{C}$  NMR (100 MHz,  $\text{CDCl}_3$ )

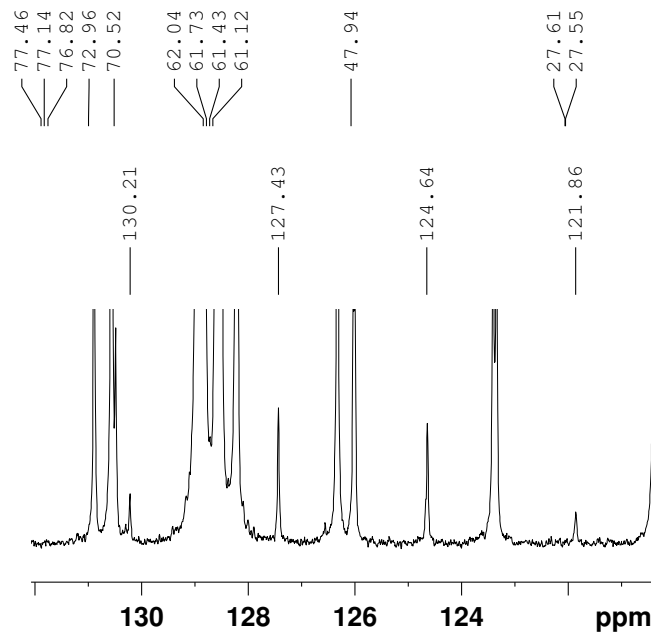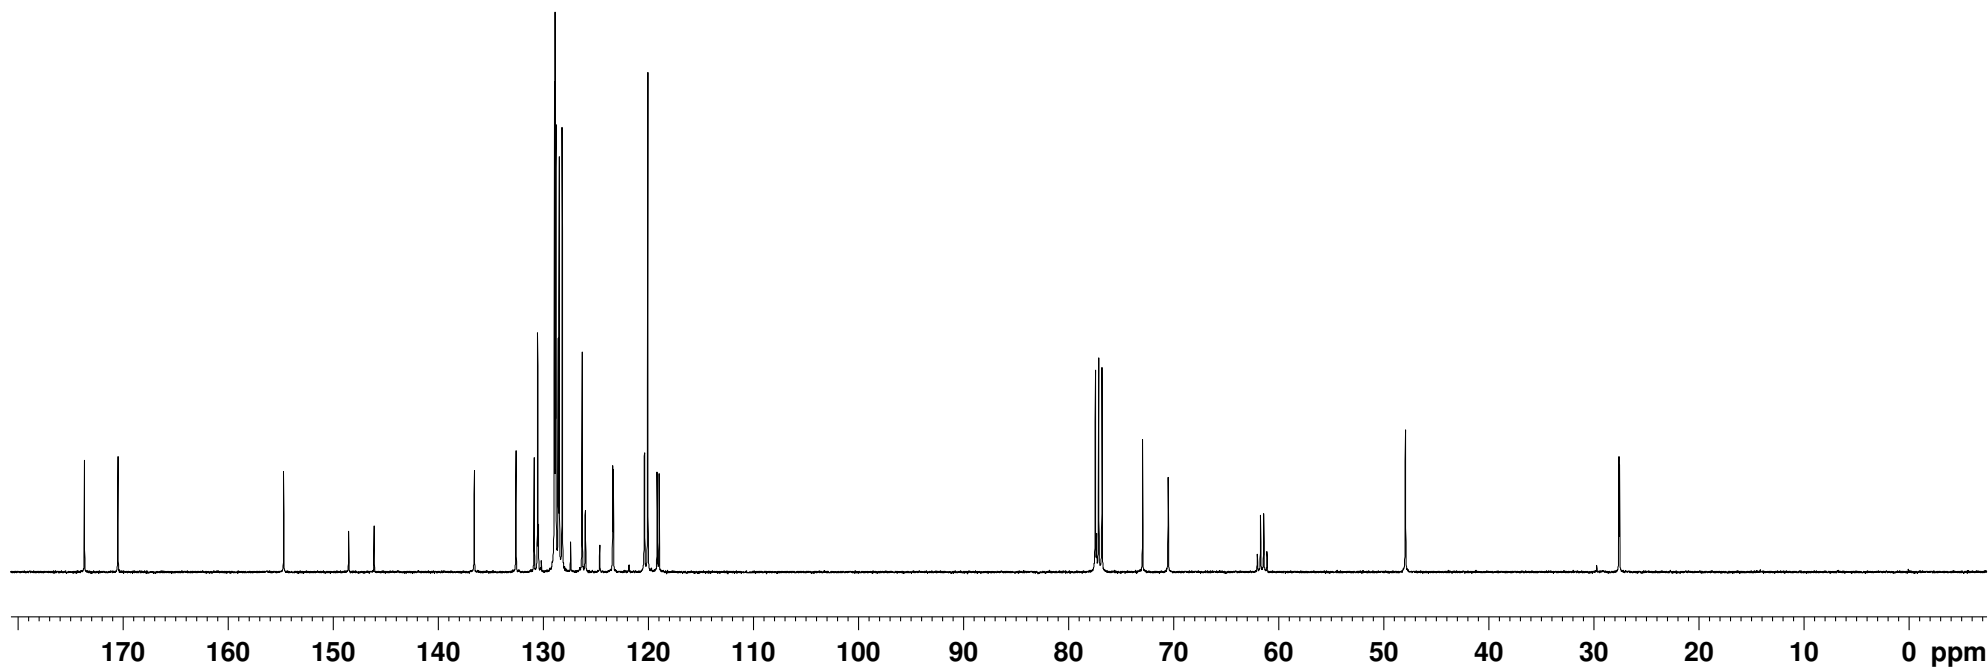



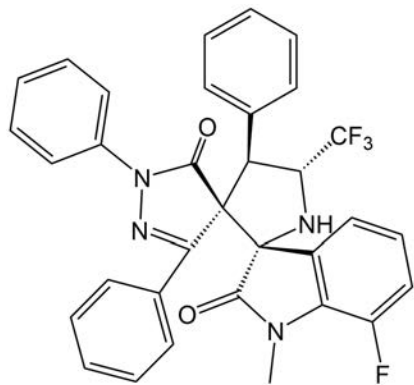

**3ak**

<sup>19</sup>F NMR (282 MHz, CDCl<sub>3</sub>)

— -72.092

— -135.985

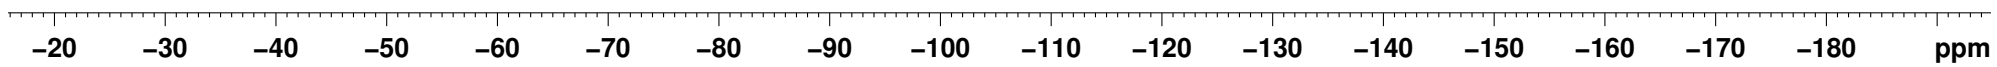

7.561  
7.517  
7.491  
7.482  
7.470  
7.444  
7.421  
7.419  
7.345  
7.319  
7.292  
7.284  
7.263  
7.238  
7.210  
7.207  
7.187  
7.182  
7.160  
6.837  
6.811  
6.785

5.784  
5.750  
5.541  
5.518  
5.492

3.468  
3.441  
3.418  
3.381

2.712

-0.000

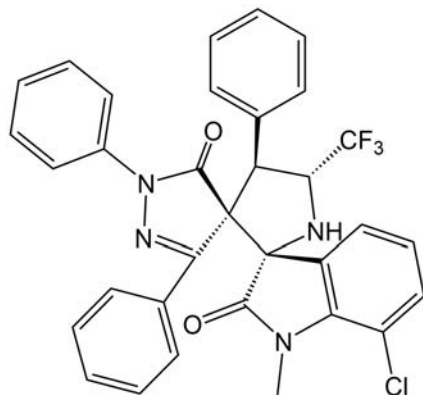

<sup>1</sup>H NMR (300 MHz, CDCl<sub>3</sub>)

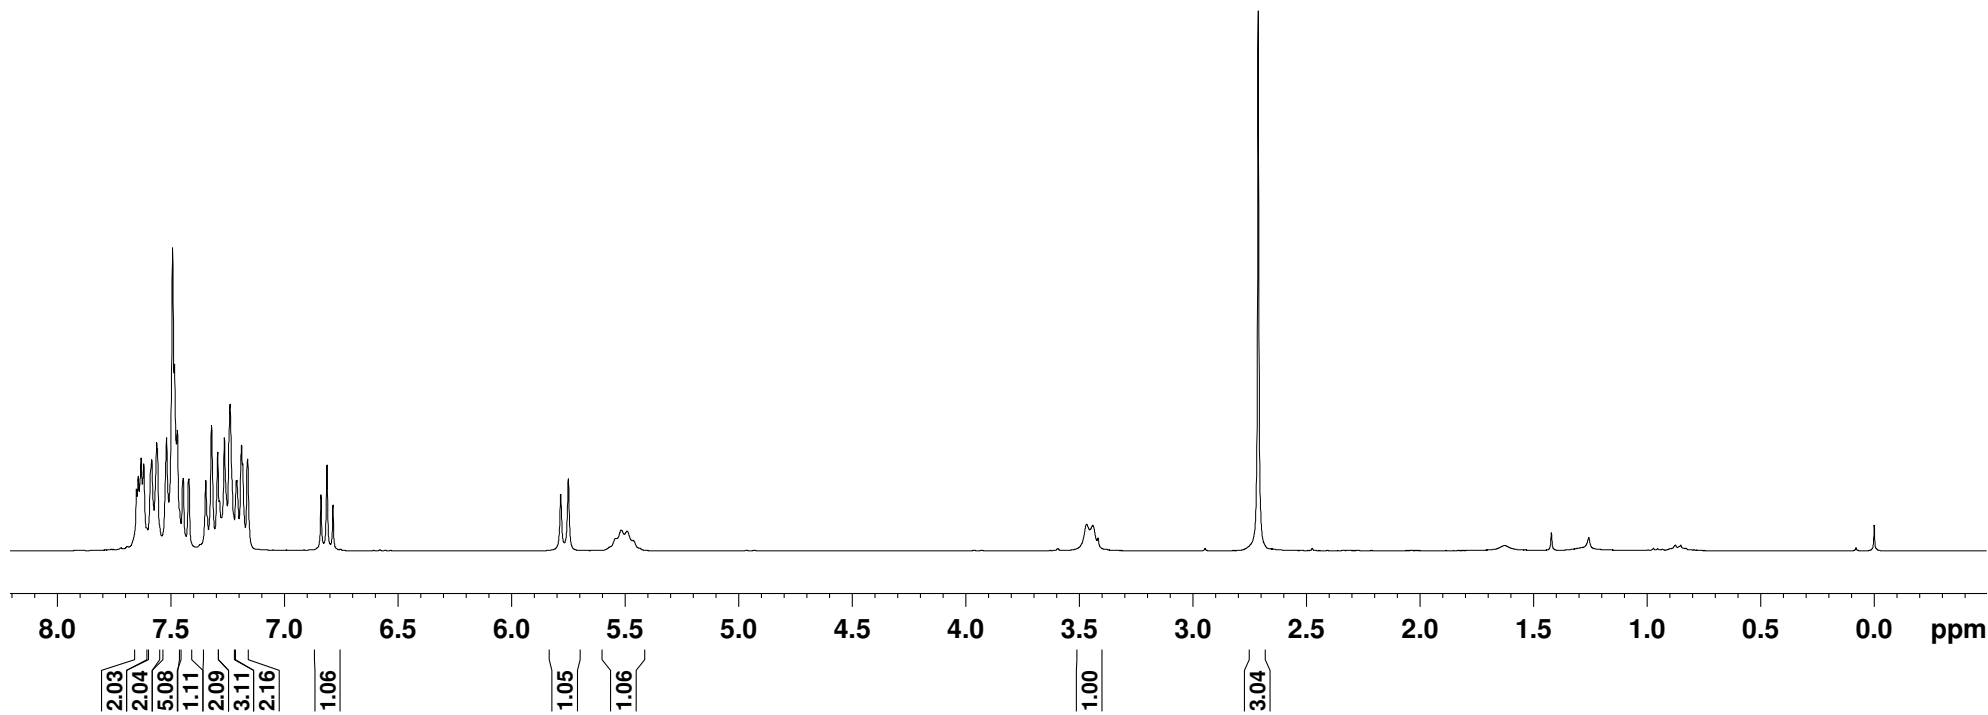

— 174.25  
 — 170.37  
 — 154.67  
 139.63  
 136.52  
 133.31  
 132.52  
 130.84  
 130.55  
 130.13  
 128.94  
 128.86  
 128.82  
 128.58  
 128.47  
 128.22  
 127.34  
 126.33  
 125.95  
 124.56  
 123.43  
 122.88  
 120.09  
 115.63

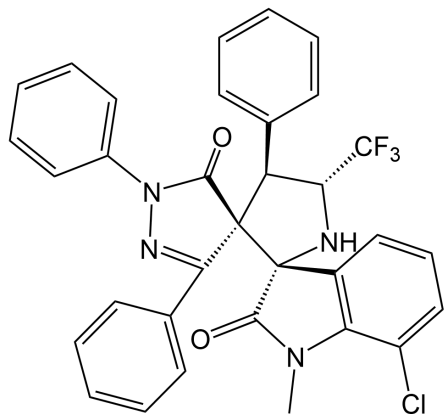

**3al**

$^{13}\text{C}$  NMR (100 MHz,  $\text{CDCl}_3$ )

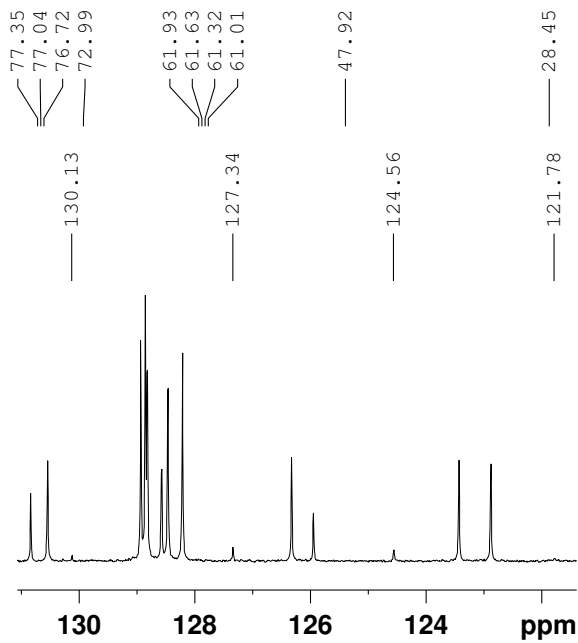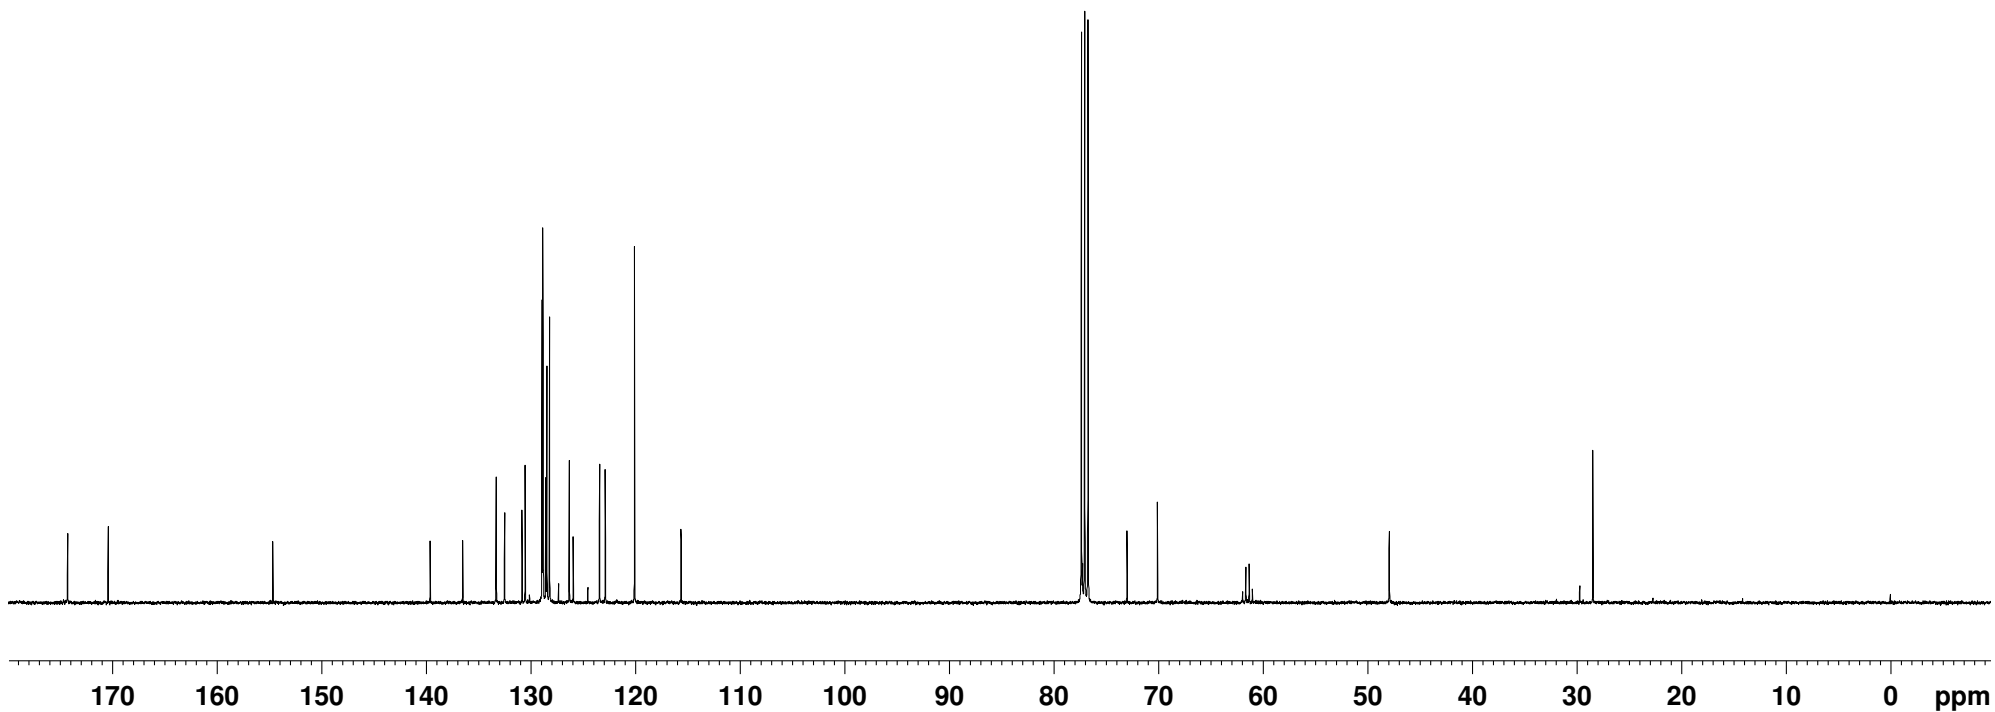

— 0.01

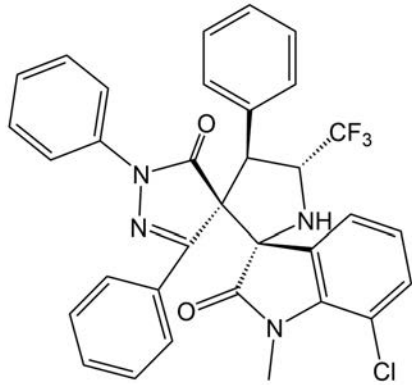

**3al**

<sup>19</sup>F NMR (282 MHz, CDCl<sub>3</sub>)

— -72.119

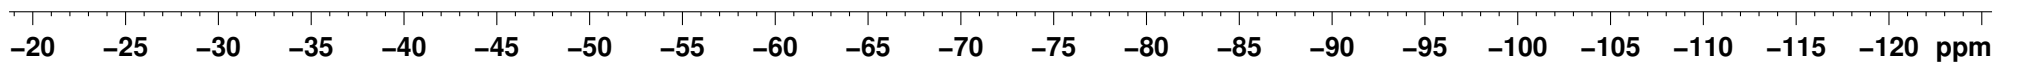

7.485  
7.472  
7.464  
7.368  
7.365  
7.341  
7.318  
7.291  
7.283  
7.276  
7.262  
7.244  
7.237  
7.221  
7.209  
7.205  
7.186  
7.180  
7.166  
7.159  
7.156  
7.146  
6.770  
6.744  
6.717  
5.779  
5.745  
5.576  
5.552  
5.520  
5.495  
5.470  
5.463  
5.438

3.473  
3.441  
3.427  
3.241  
3.231  
3.211  
3.196

2.719

-0.000

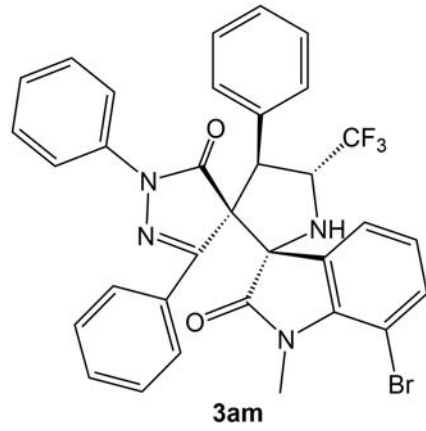

<sup>1</sup>H NMR (300 MHz, CDCl<sub>3</sub>)

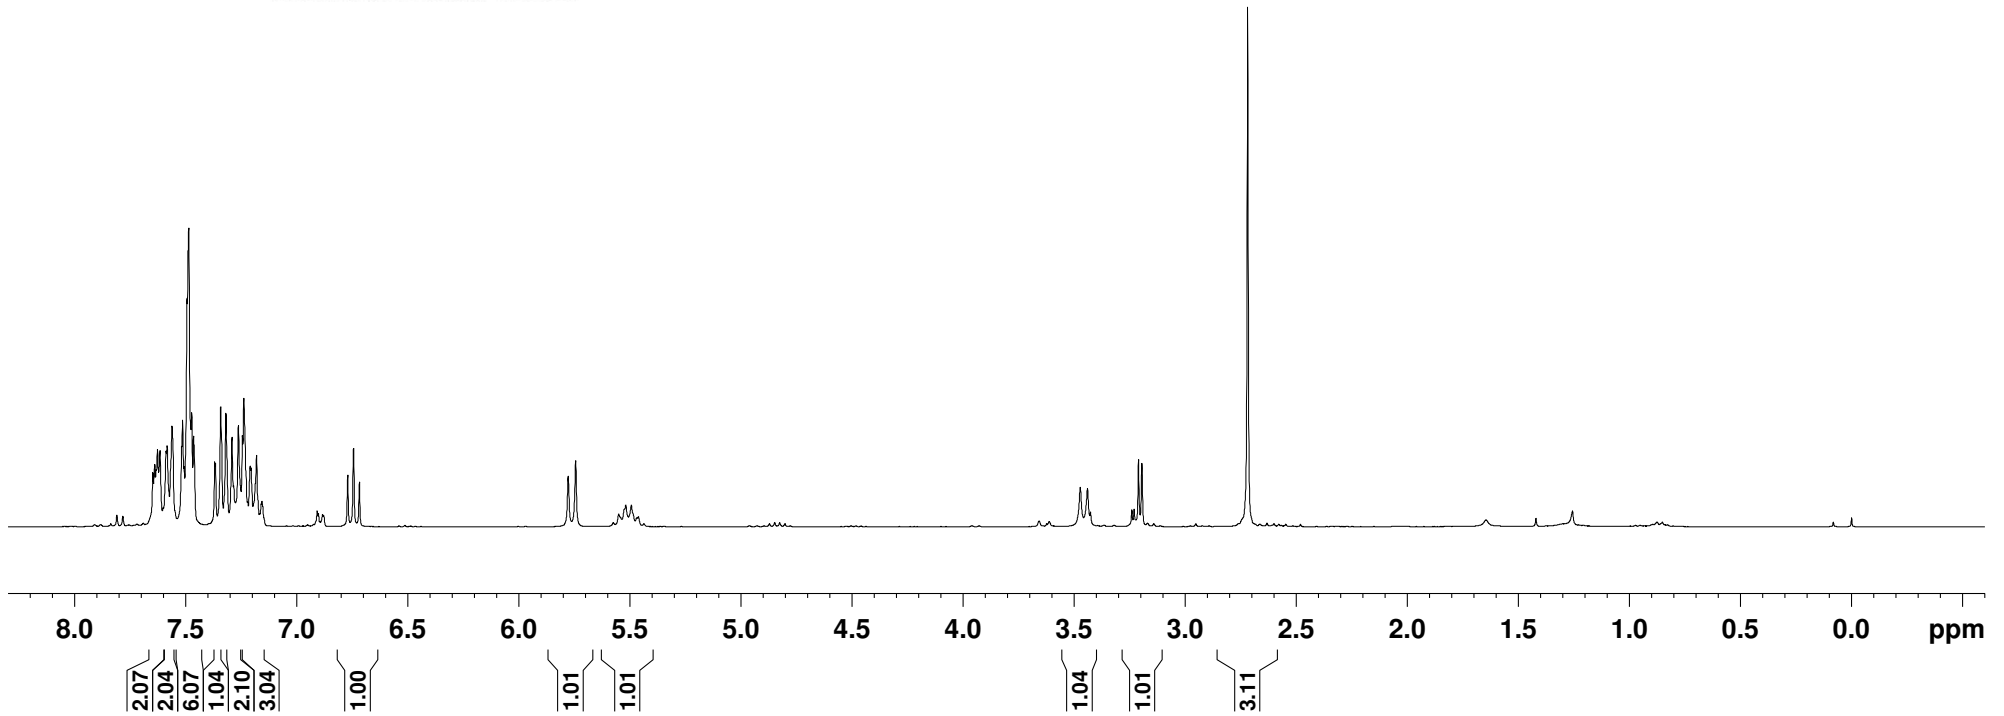

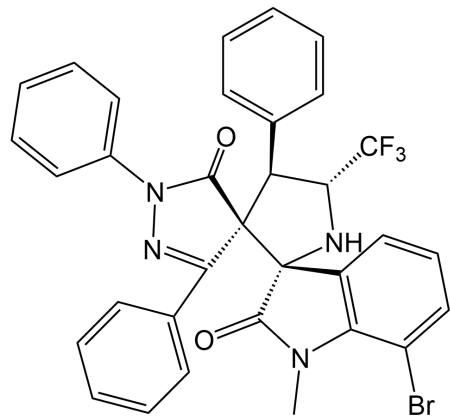

**3am**

<sup>13</sup>C NMR (100 MHz, CDCl<sub>3</sub>)

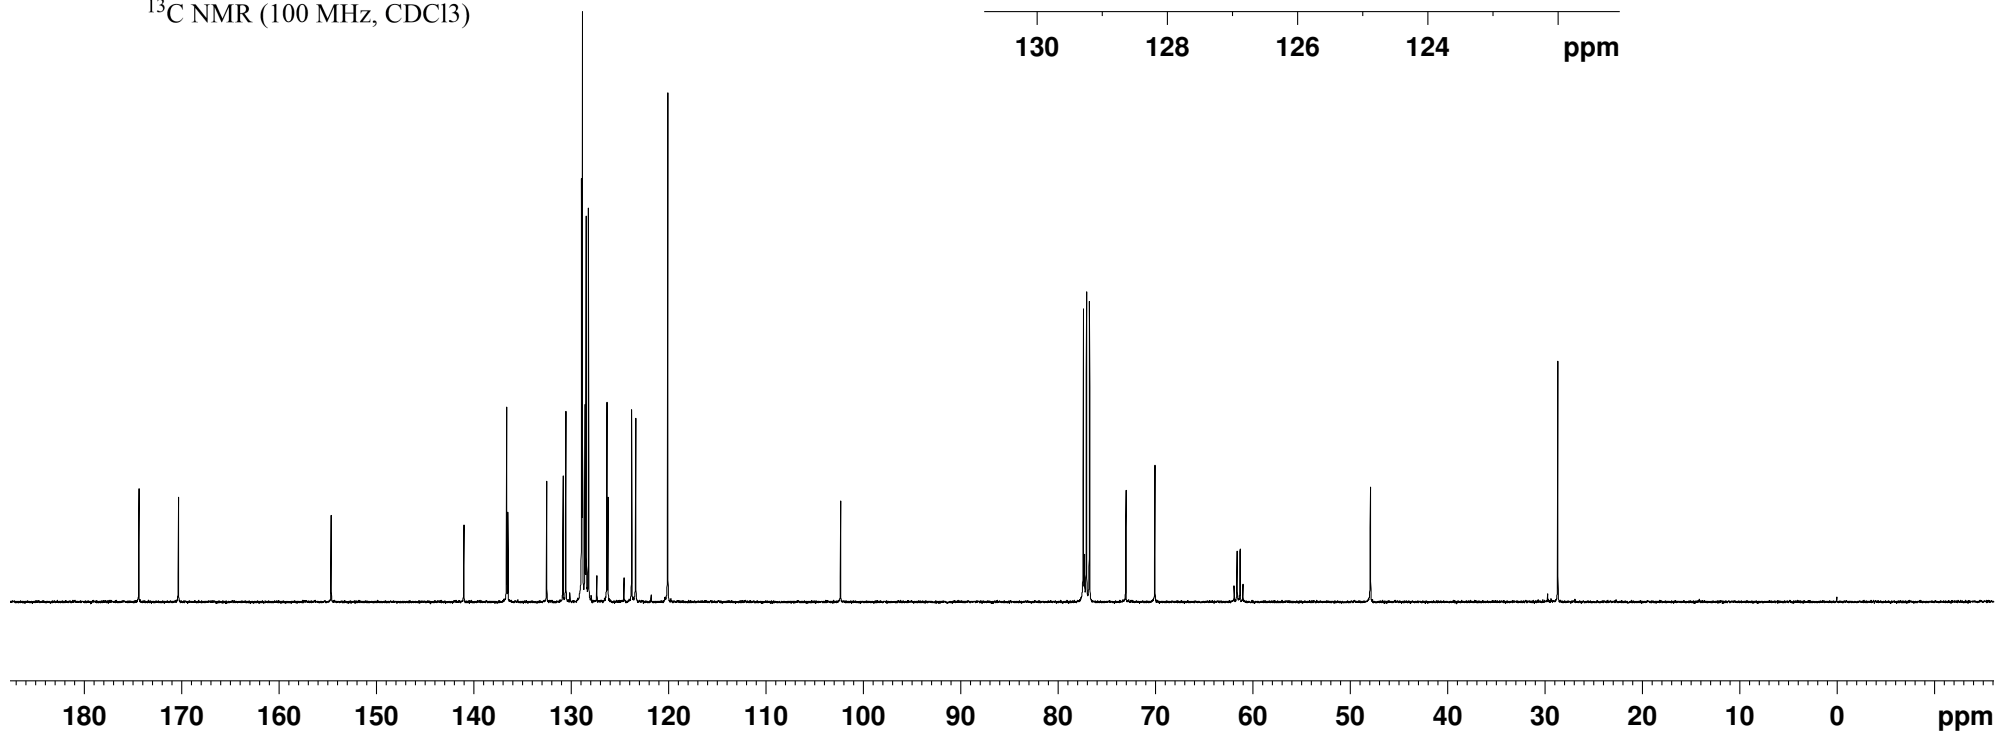

174.43  
170.37  
154.68  
141.05  
136.65  
136.52  
132.54  
130.86  
130.58  
130.17  
128.96  
128.88  
128.86  
128.60  
128.49  
128.24  
127.38  
126.36  
126.25  
124.60  
123.80  
123.40  
121.81  
120.11  
102.36

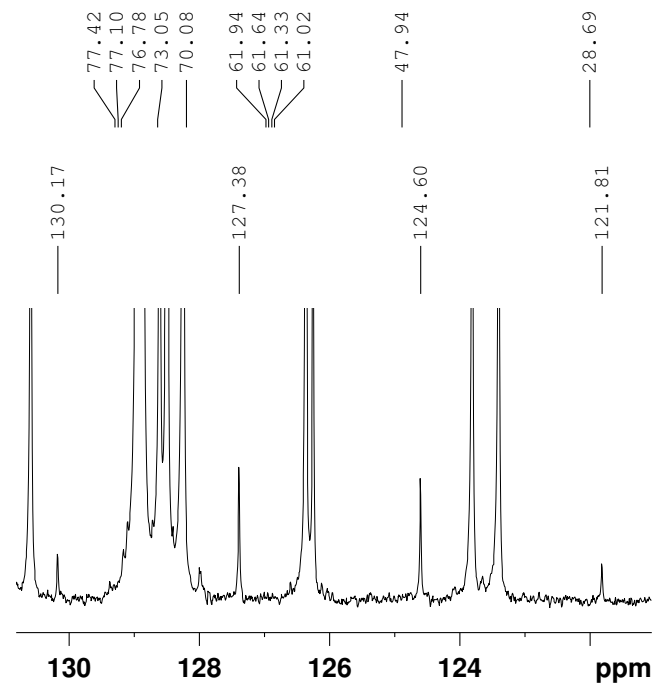

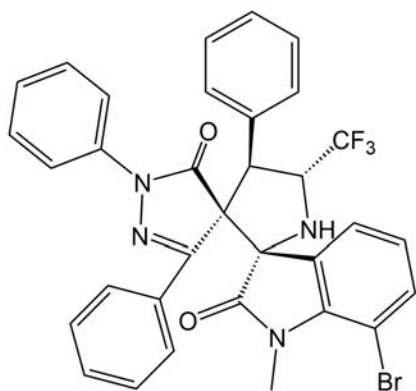

**3am**

<sup>19</sup>F NMR (282 MHz, CDCl<sub>3</sub>)

— -72.065

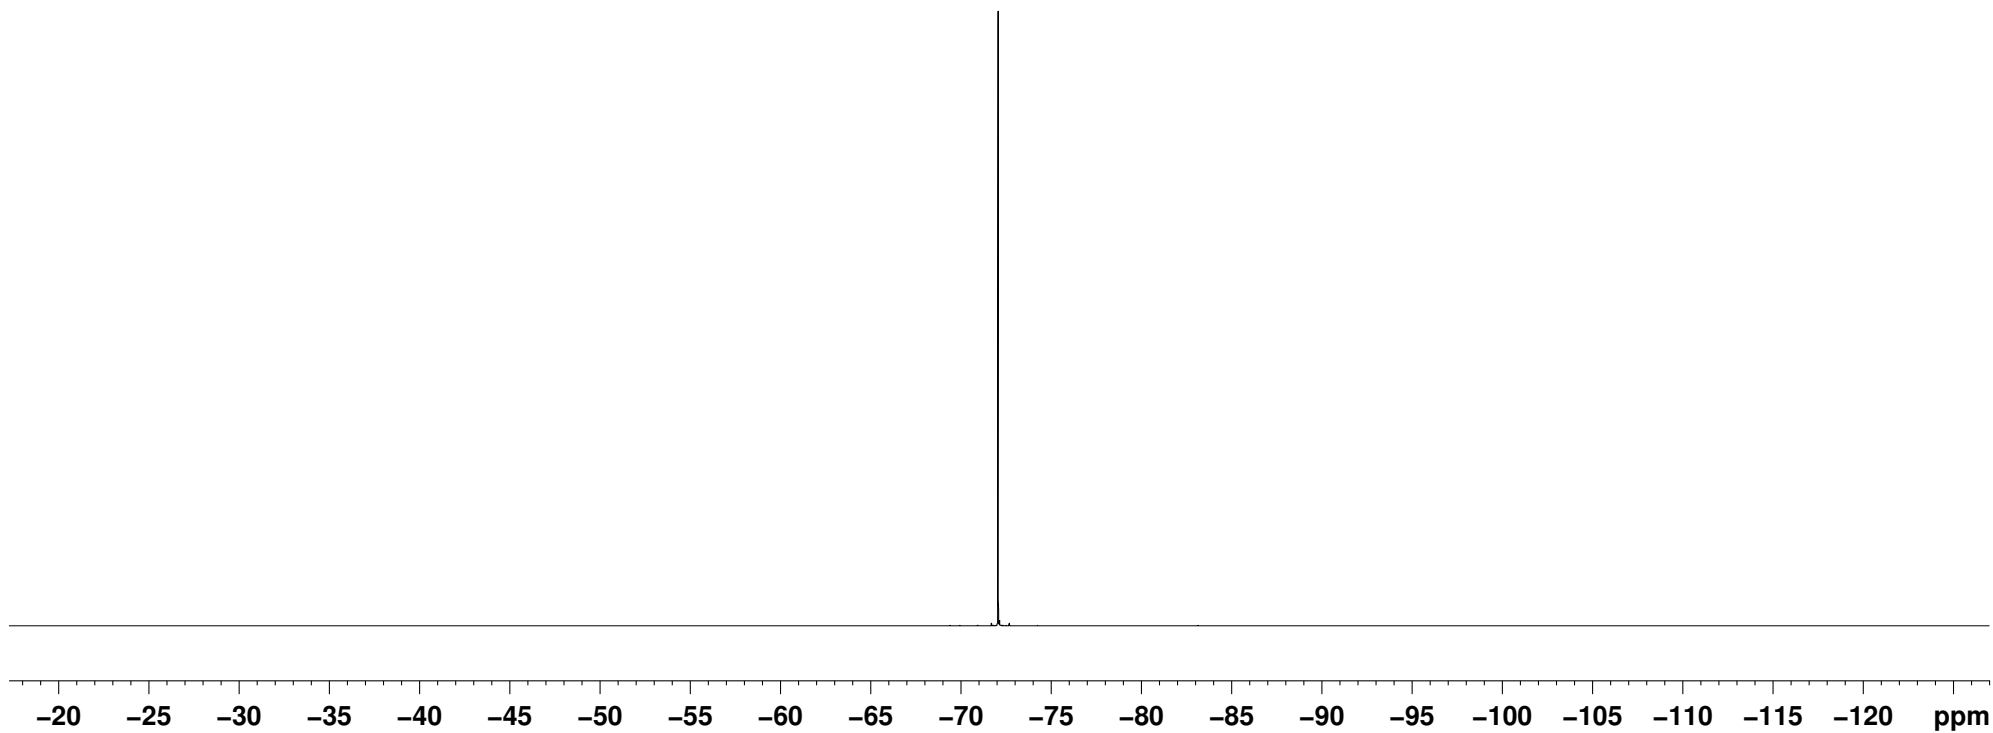

7.441  
7.429  
7.424  
7.409  
7.393  
7.341  
7.335  
7.316  
7.289  
7.247  
7.244  
7.221  
7.194  
7.170  
7.145  
6.973  
6.945  
6.916  
6.905  
6.879  
6.853  
6.596  
6.570  
5.827  
5.794  
5.479  
5.456

3.564  
3.535

2.337

-0.000  
-0.010

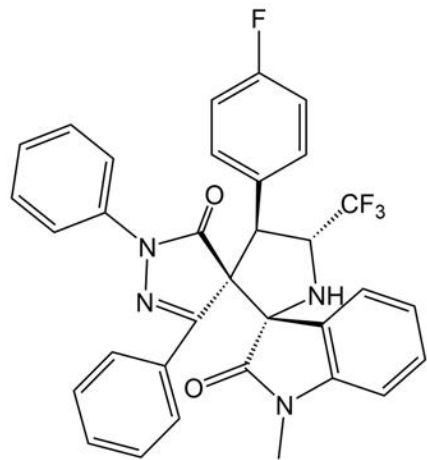

<sup>1</sup>H NMR (300 MHz, CDCl<sub>3</sub>)

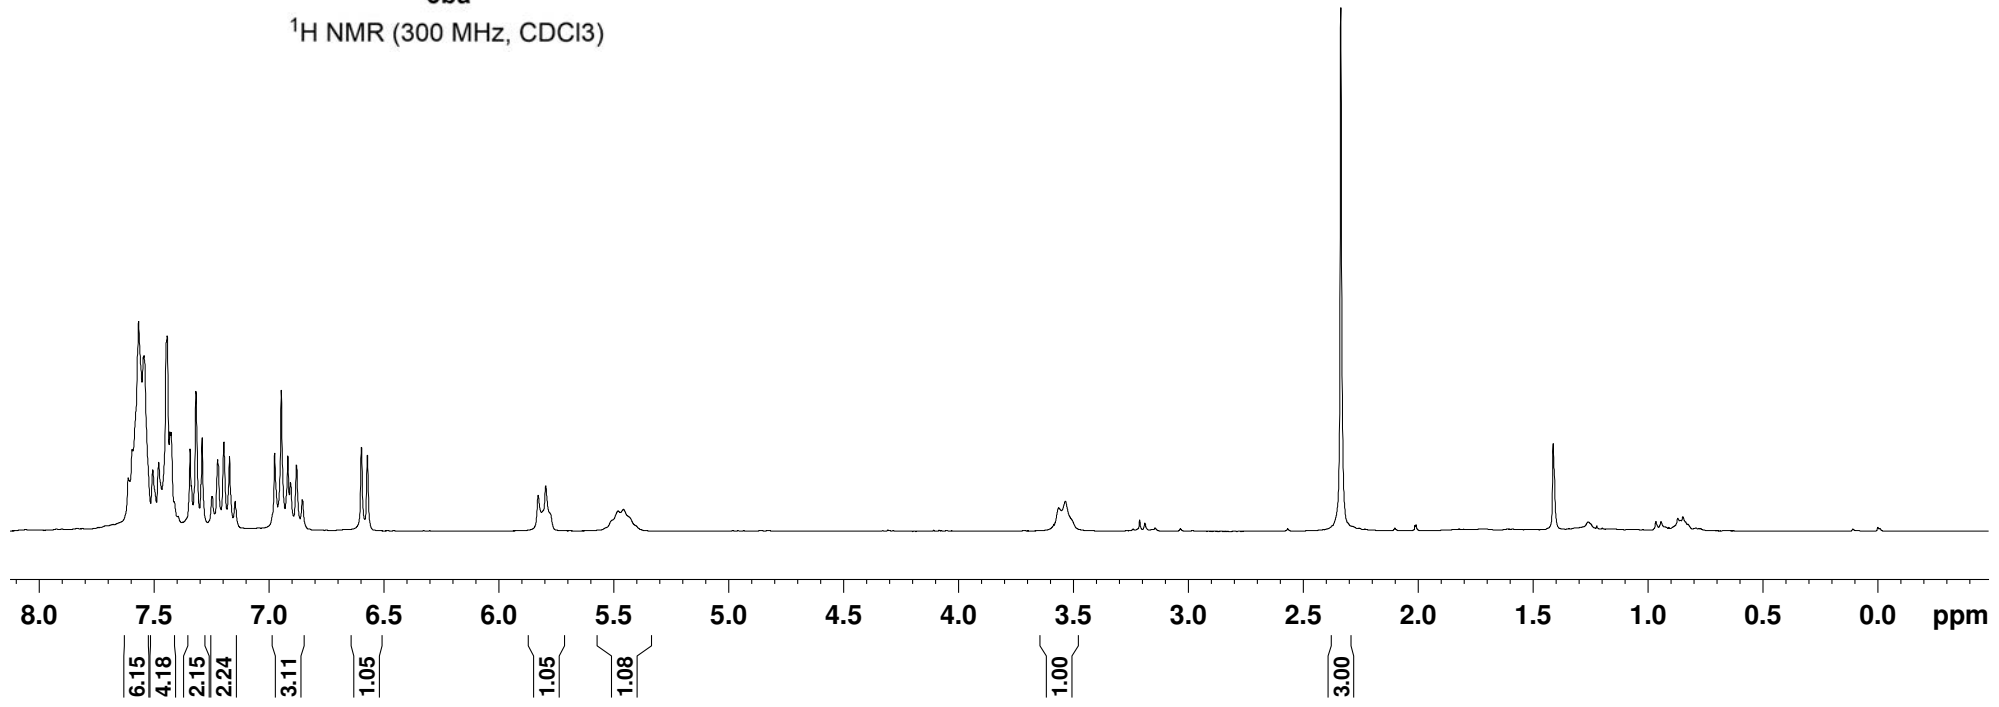



— 173.88  
 — 170.59  
 — 164.21  
 — 160.93  
 — 154.81  
 — 143.75  
 — 136.55  
 — 131.62  
 — 131.15  
 — 130.87  
 — 130.50  
 — 130.37  
 — 130.26  
 — 128.93  
 — 128.70  
 — 128.13  
 — 127.92  
 — 126.38  
 — 124.36  
 — 124.21  
 — 122.94  
 — 122.86  
 — 120.49  
 — 120.04  
 — 116.10  
 — 115.81  
 — 108.23

— 77.59  
 — 77.17  
 — 76.74  
 — 72.87  
 — 70.51  
 — 62.44  
 — 62.03  
 — 61.62  
 — 61.21

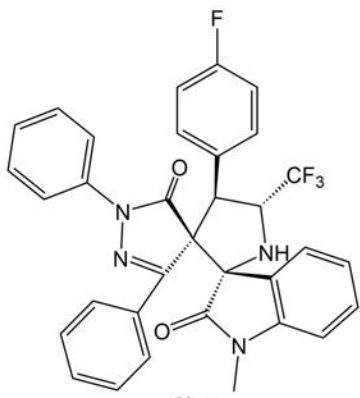

**3ba**  
<sup>13</sup>C NMR (75 MHz, CDCl<sub>3</sub>)

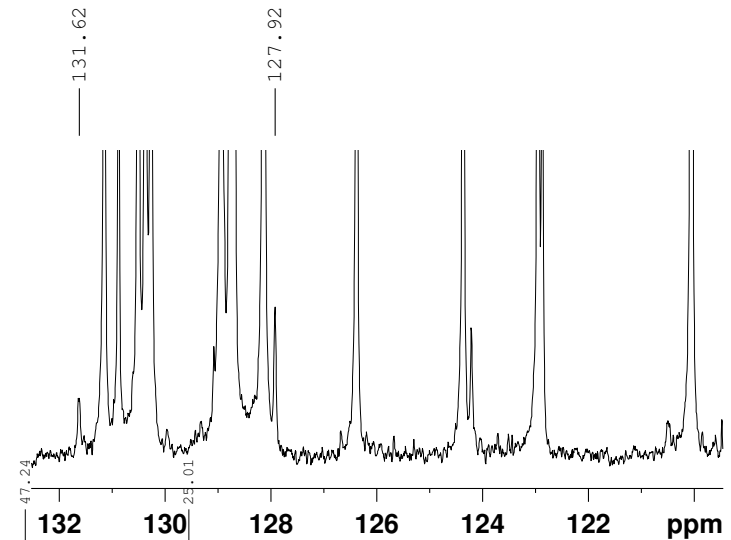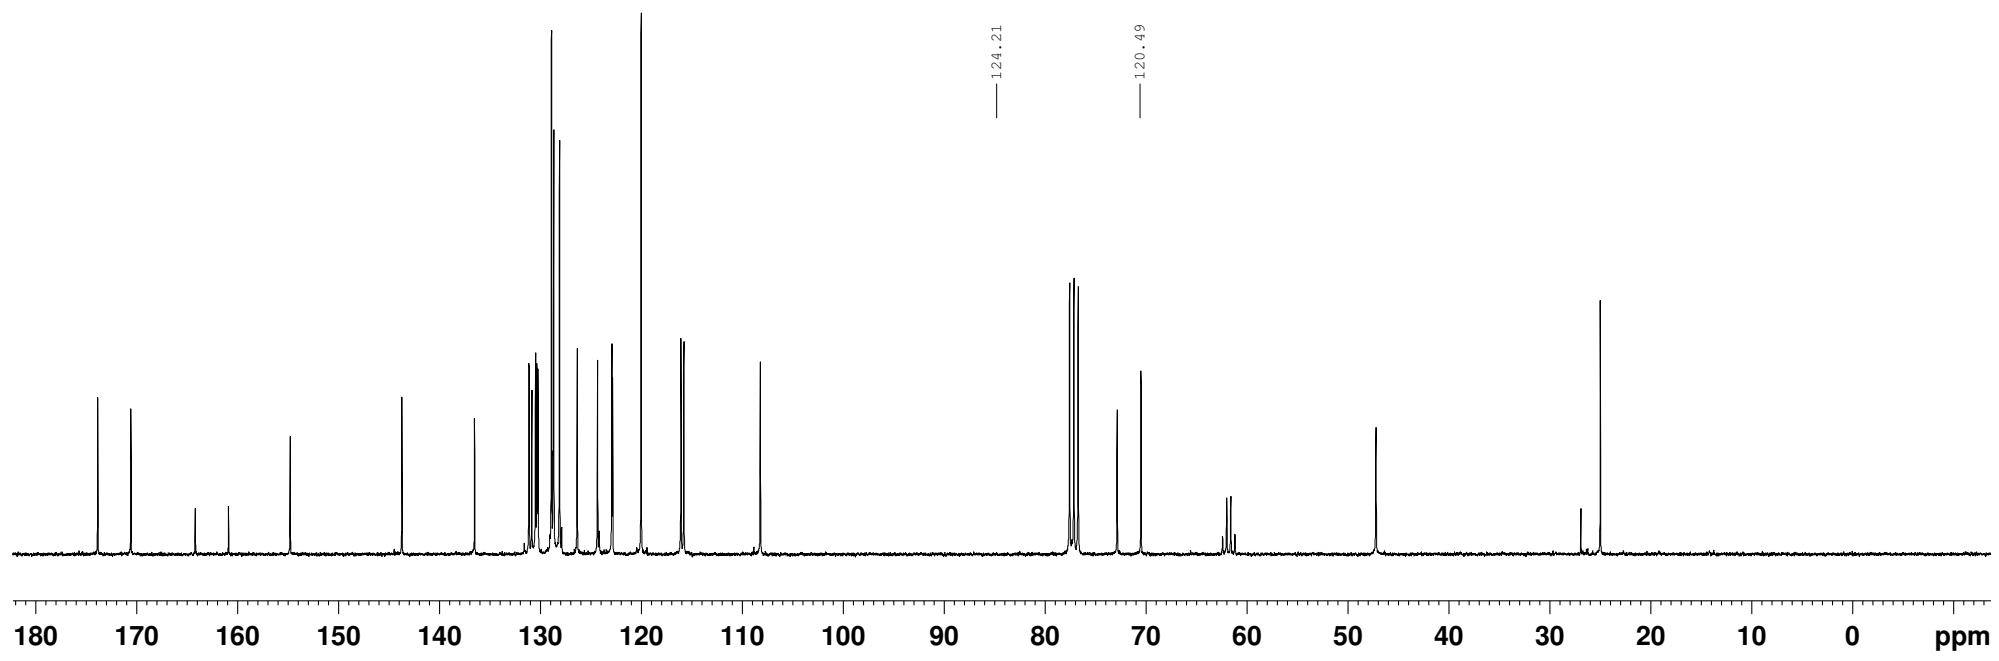

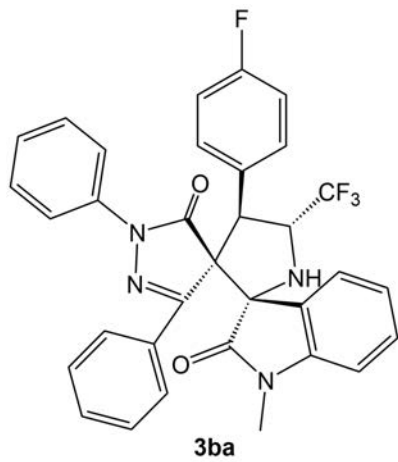

<sup>19</sup>F NMR (282 MHz, CDCl<sub>3</sub>)

— -71.97

— -113.05

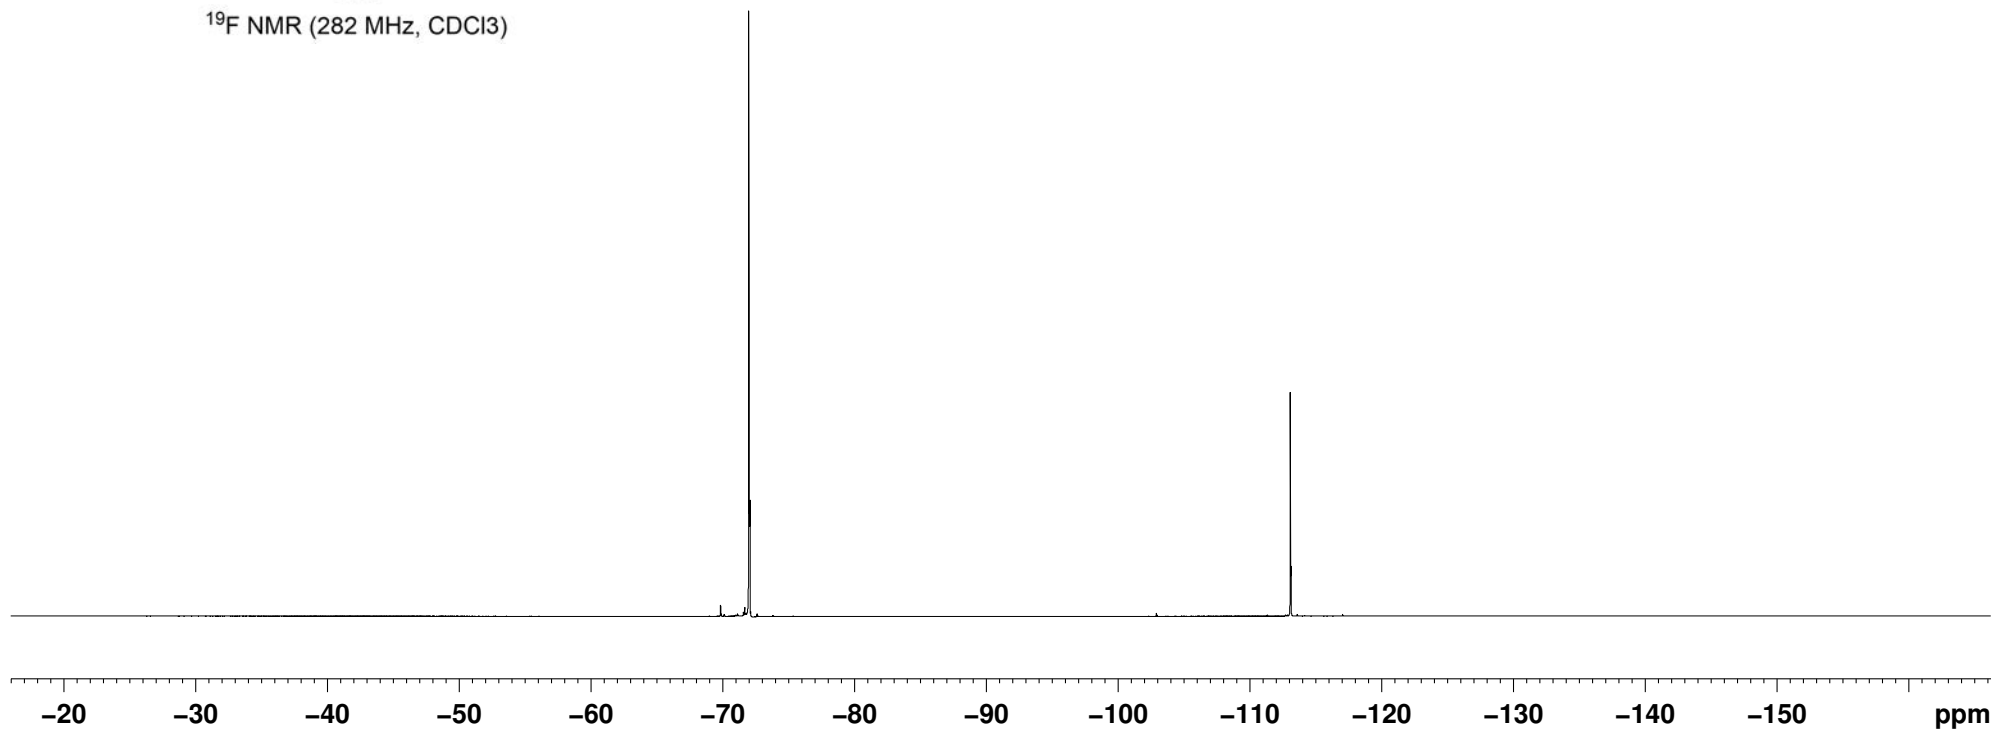

7.528  
7.492  
7.467  
7.452  
7.447  
7.437  
7.428  
7.412  
7.398  
7.356  
7.331  
7.304  
7.251  
7.233  
7.230  
7.223  
7.209  
7.185  
7.161  
6.911  
6.886  
6.862  
6.606  
6.580  
5.805  
5.771  
5.497  
5.469  
5.444  
5.417

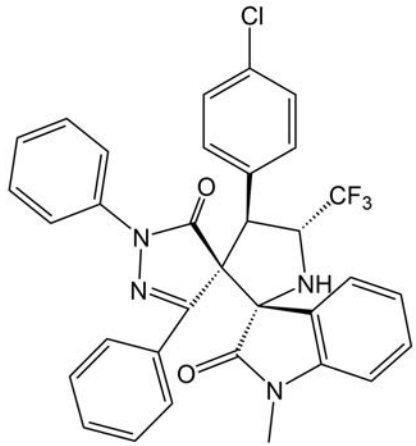

3ca

<sup>1</sup>H NMR (300 MHz, CDCl<sub>3</sub>)

3.553  
3.522

2.348

-0.000

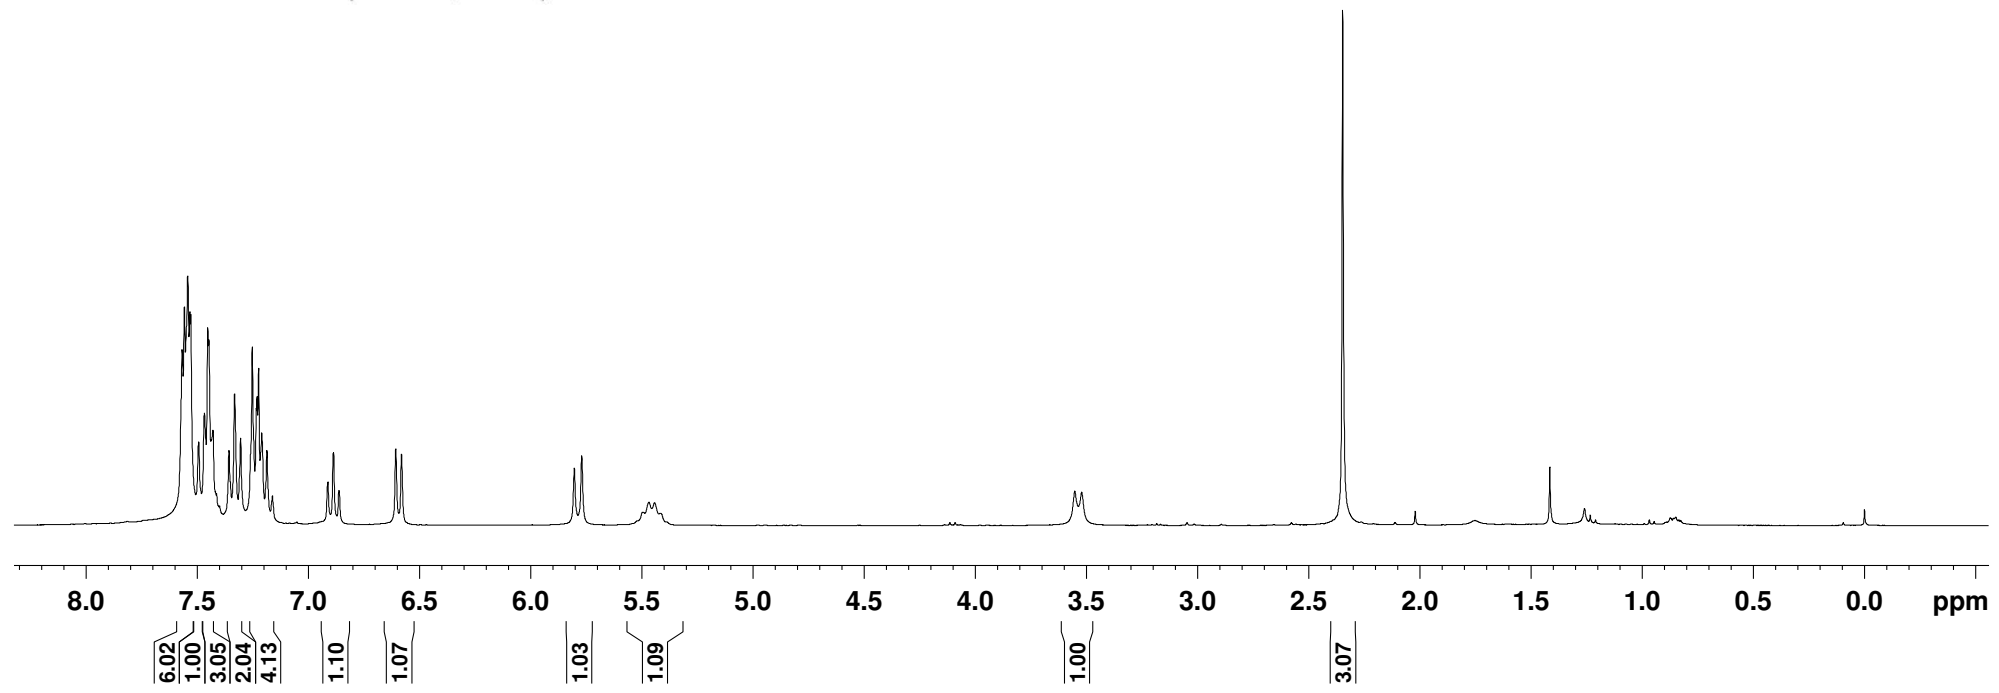

— 173.76  
— 170.45  
  
— 154.64  
143.68  
136.46  
134.41  
131.50  
131.12  
130.75  
130.46  
129.89  
129.13  
128.88  
128.60  
128.08  
127.78  
126.33  
124.27  
124.07  
122.90  
122.70  
120.36  
119.97  
108.17

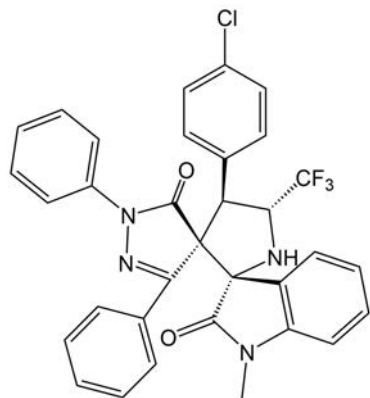

**3ca**

<sup>13</sup>C NMR (75 MHz, CDCl<sub>3</sub>)

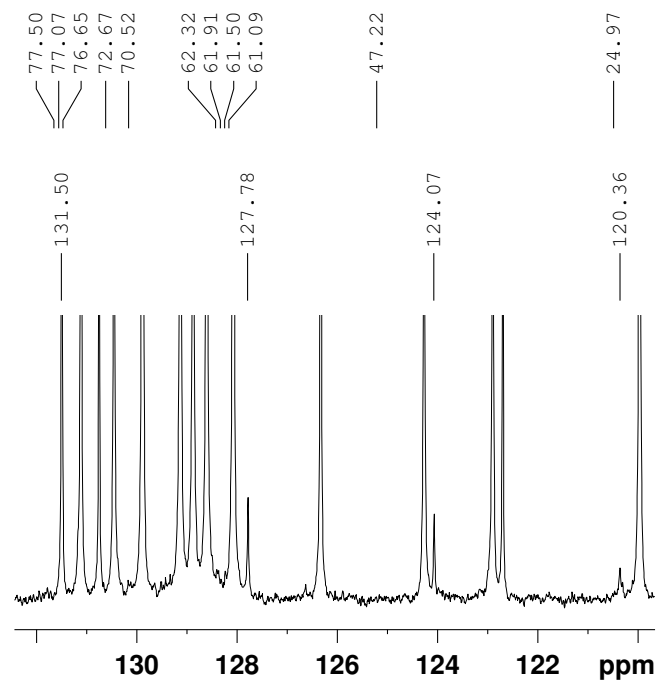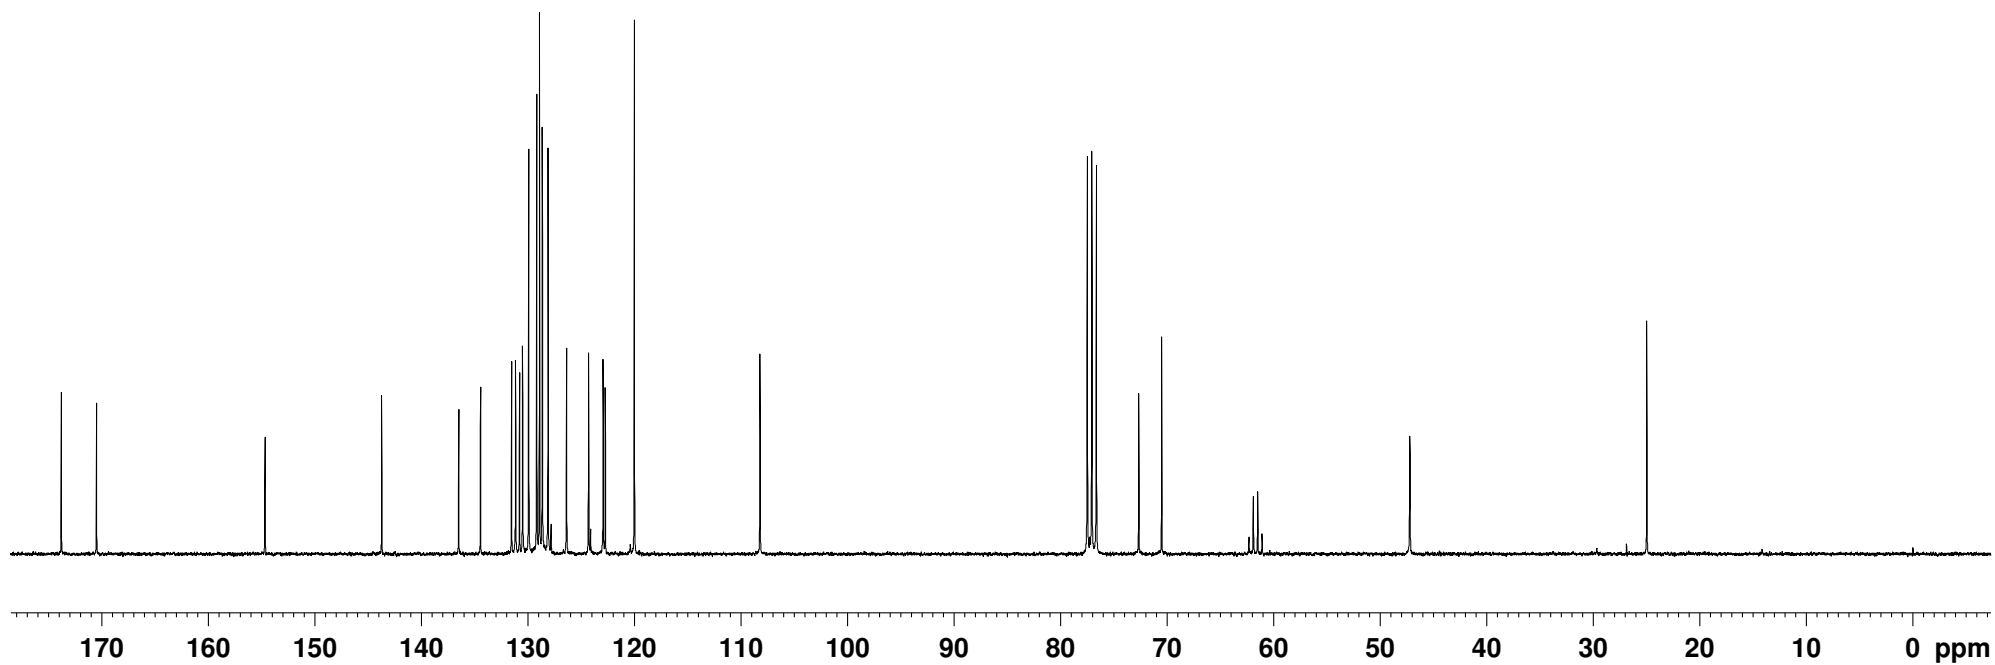

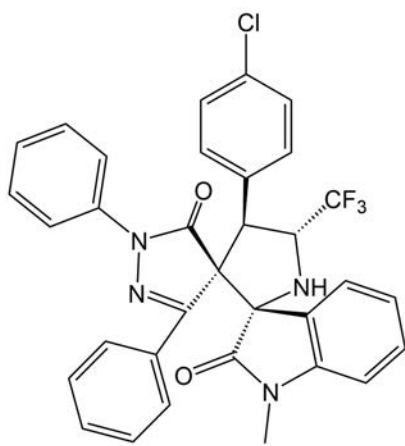

<sup>19</sup>F NMR (282 MHz, CDCl<sub>3</sub>)

— -72.02

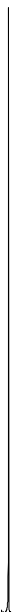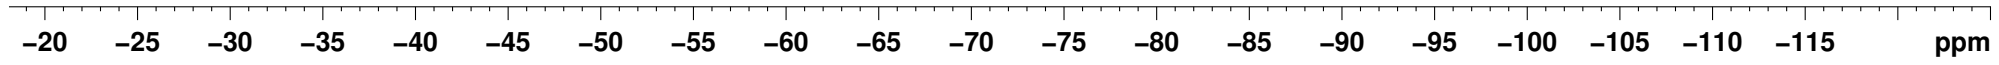

7.542  
7.528  
7.494  
7.466  
7.452  
7.429  
7.405  
7.377  
7.362  
7.336  
7.309  
7.263  
7.238  
7.213  
7.191  
7.167  
6.916  
6.891  
6.866  
6.609  
6.583

5.787  
5.753  
5.487  
5.462  
5.437

3.546  
3.517

2.350

-0.000

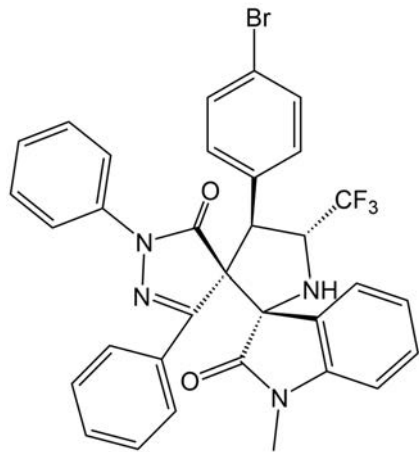

**3da**

$^1\text{H}$  NMR (300 MHz,  $\text{CDCl}_3$ )

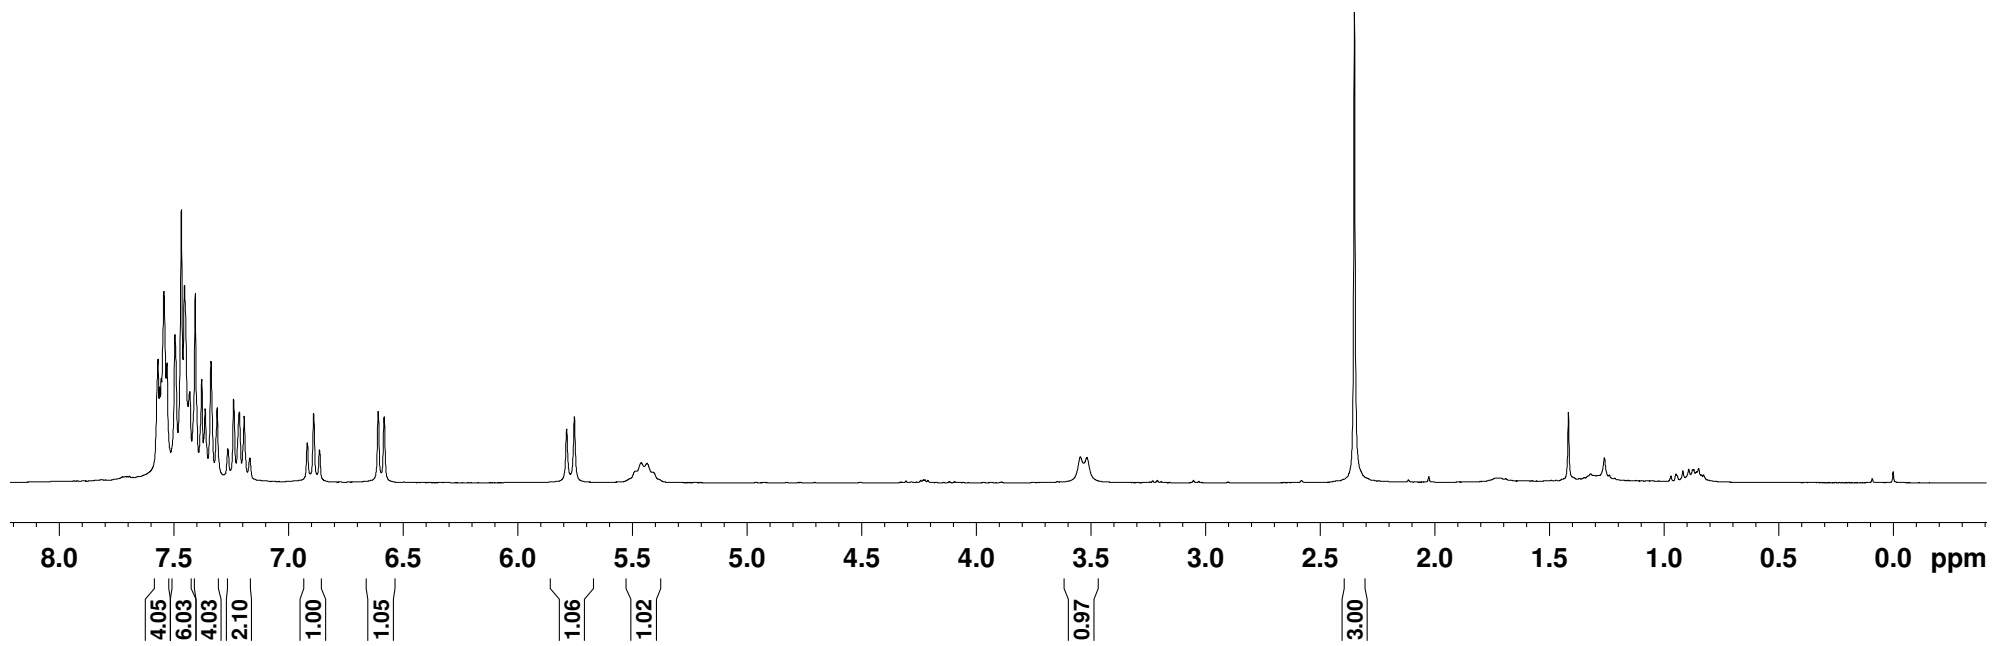

— 173.81  
 — 170.50  
 — 154.68  
 — 143.75  
 — 136.52  
 — 132.15  
 — 132.11  
 — 131.54  
 — 131.18  
 — 130.81  
 — 130.51  
 — 130.26  
 — 128.94  
 — 128.66  
 — 128.13  
 — 127.83  
 — 126.39  
 — 124.32  
 — 124.12  
 — 122.95  
 — 122.74  
 — 122.70  
 — 120.03  
 — 108.23

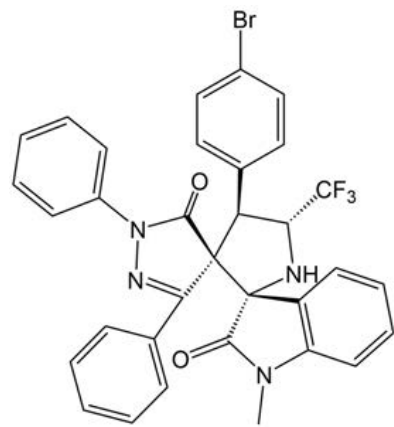

**3da**

<sup>13</sup>C NMR (75 MHz, CDCl<sub>3</sub>)

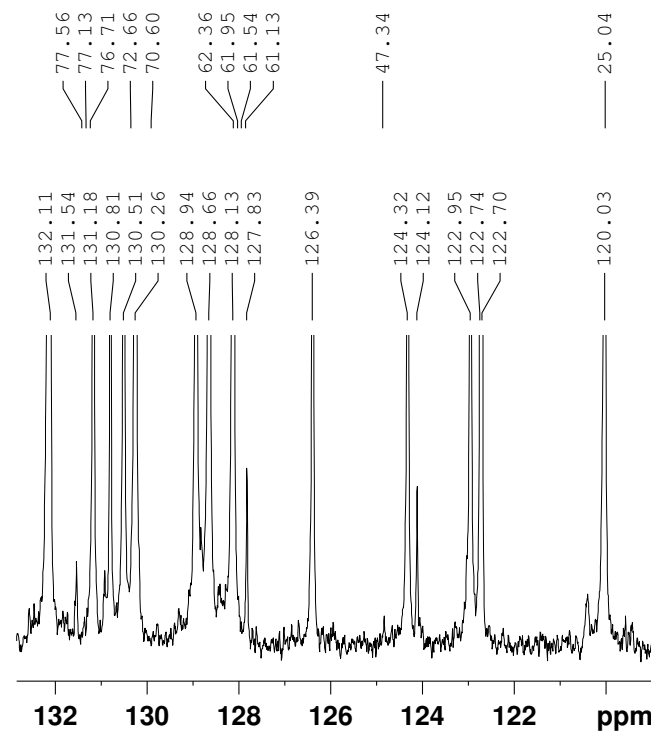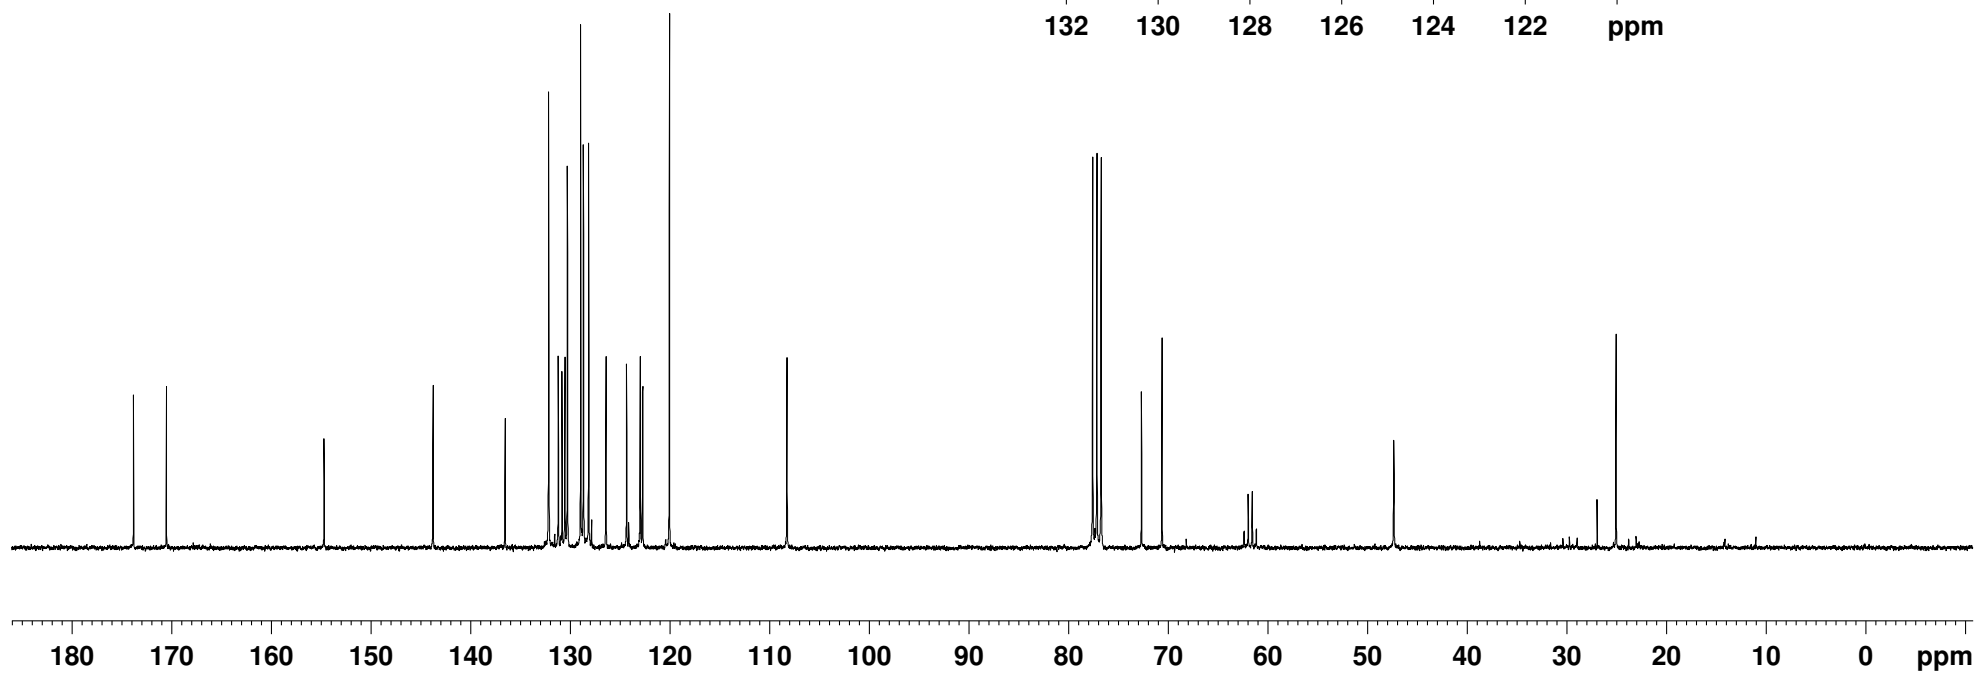

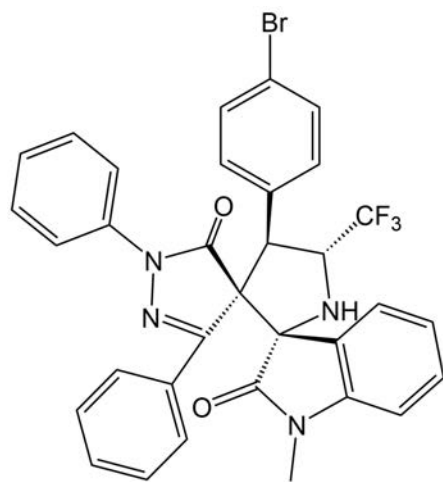

**3da**

<sup>19</sup>F NMR (282 MHz, CDCl<sub>3</sub>)

— -72.04

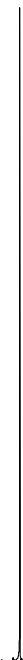

-20 -25 -30 -35 -40 -45 -50 -55 -60 -65 -70 -75 -80 -85 -90 -95 -100 -105 -110 -115 ppm



7.498  
7.471  
7.430  
7.424  
7.412  
7.328  
7.303  
7.276  
7.231  
7.206  
7.177  
7.150  
7.125  
7.056  
7.029  
6.888  
6.863  
6.838  
6.579  
6.553

5.804  
5.770  
5.521  
5.493  
5.467  
5.441

3.553  
3.522

2.329  
2.190

-0.000

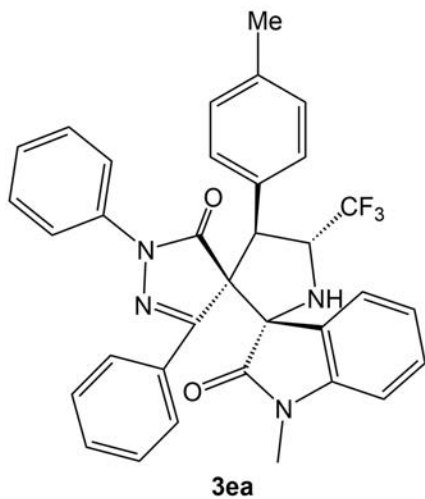

<sup>1</sup>H NMR (300 MHz, CDCl<sub>3</sub>)

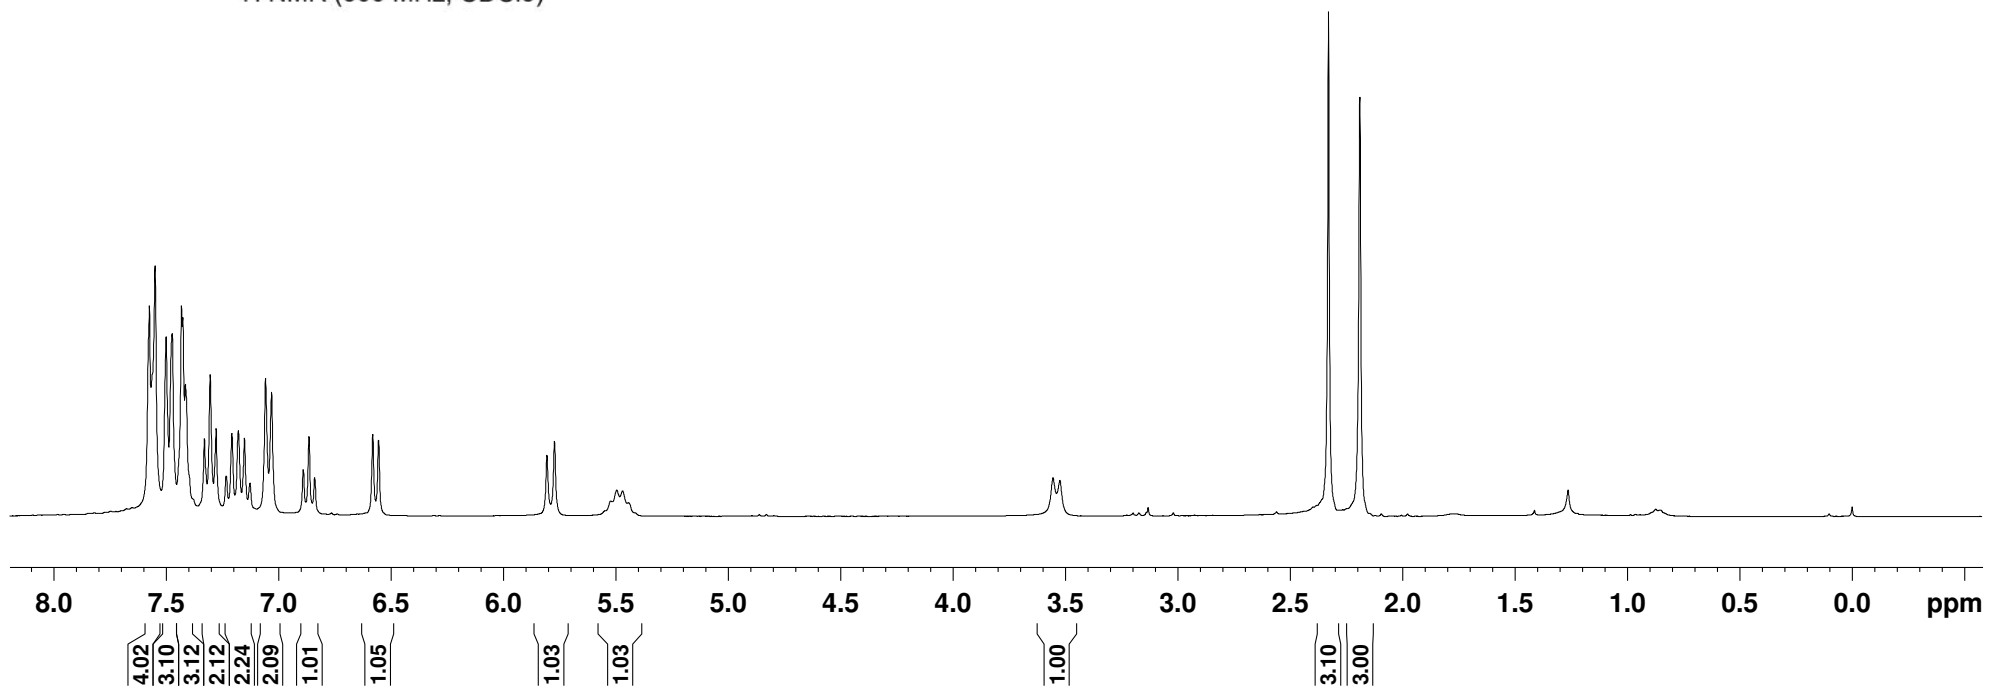

— 173.95  
 — 170.81  
 — 155.04  
 — 143.79  
 — 138.27  
 — 136.74  
 — 131.78  
 — 131.06  
 — 130.37  
 — 129.83  
 — 129.69  
 — 128.86  
 — 128.78  
 — 128.42  
 — 128.07  
 — 126.20  
 — 124.40  
 — 123.04  
 — 122.88  
 — 120.64  
 — 120.06  
 — 108.16

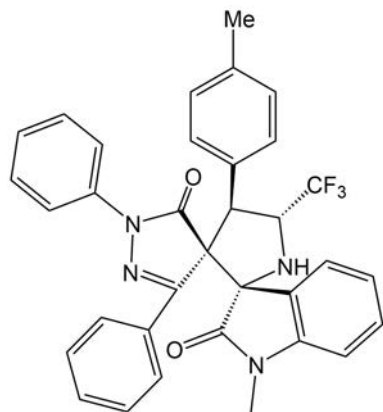

**3ea**

<sup>13</sup>C NMR (75 MHz, CDCl<sub>3</sub>)

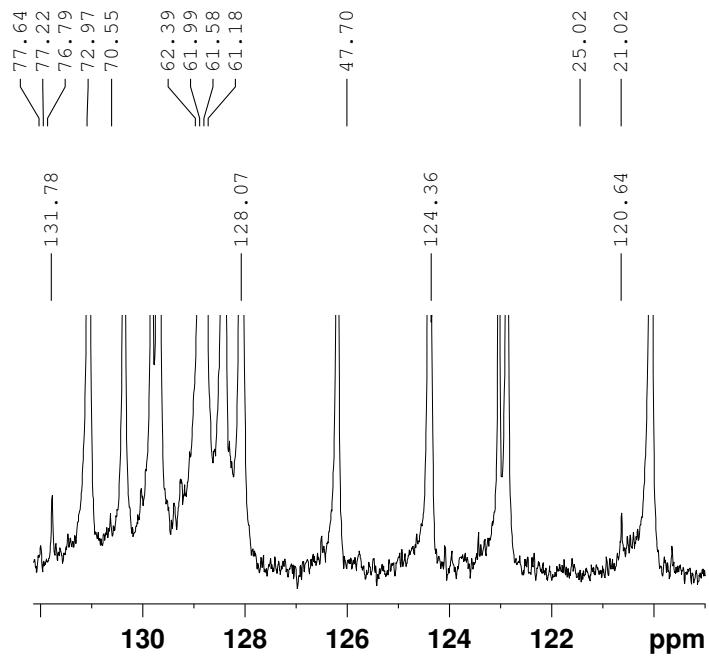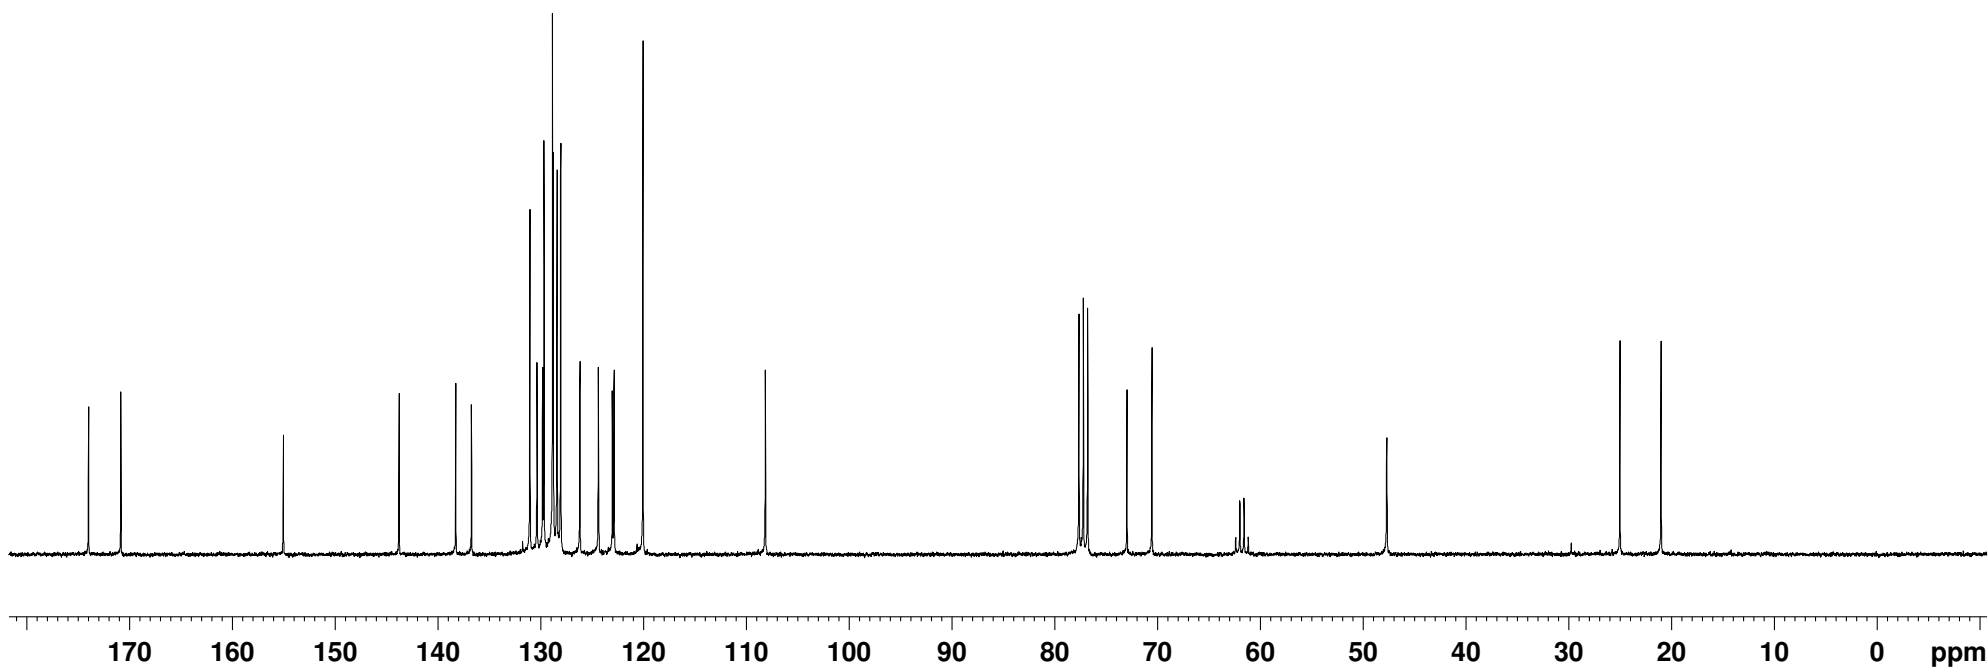

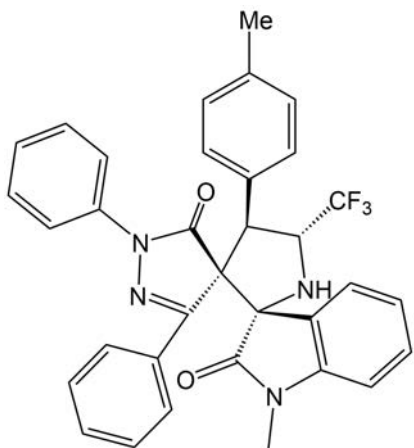

**3ea**

<sup>19</sup>F NMR (282 MHz, CDCl<sub>3</sub>)

— -71.967

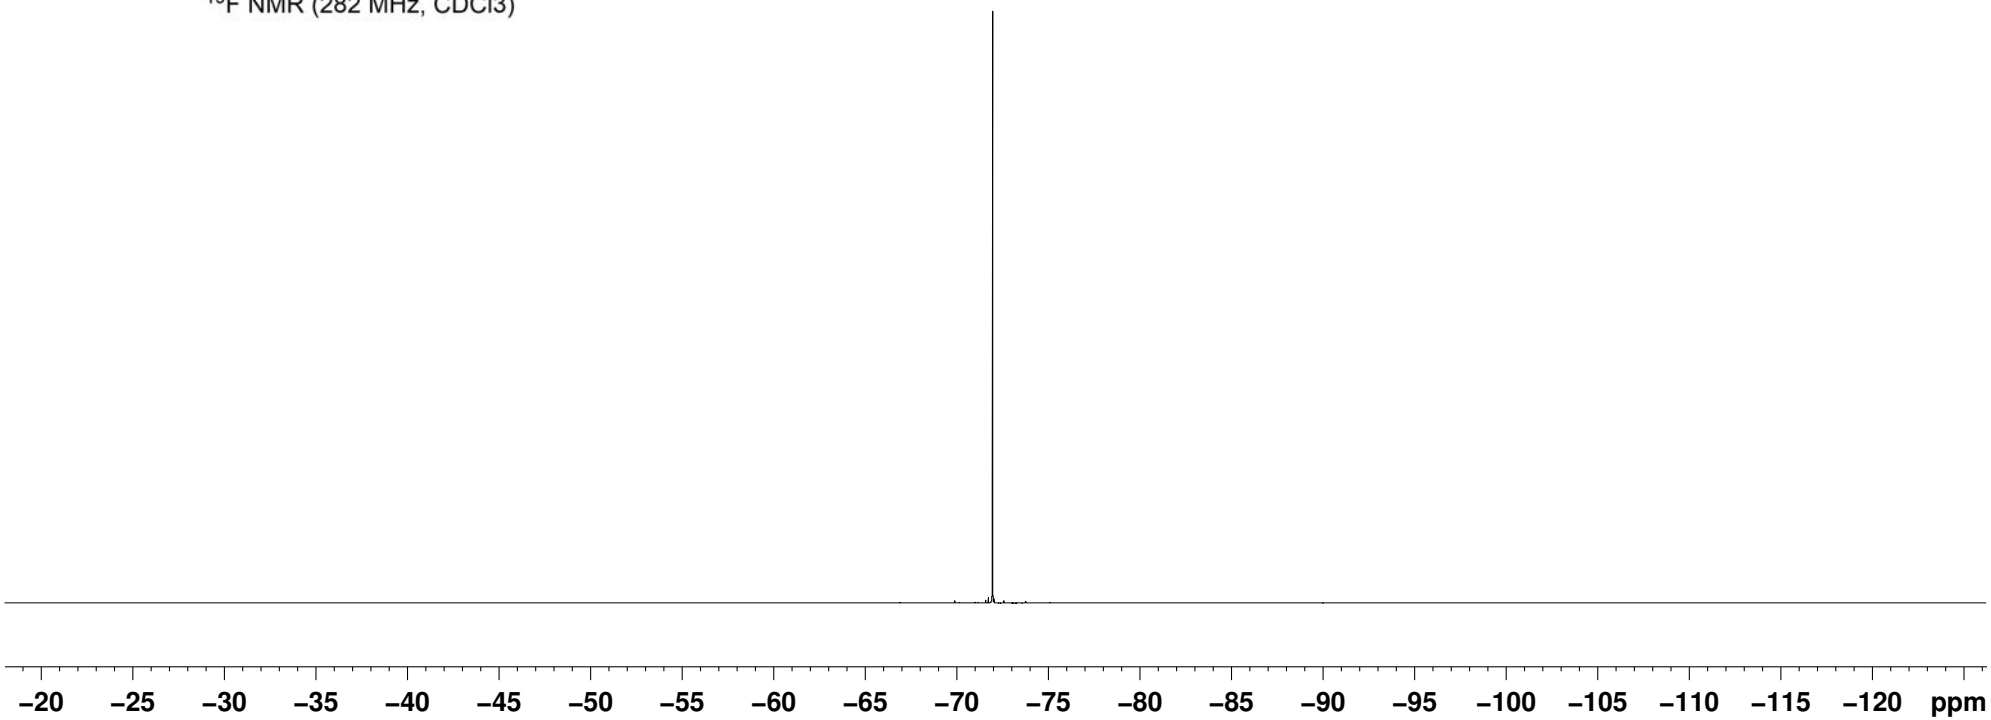

7.431  
7.426  
7.413  
7.400  
7.395  
7.350  
7.343  
7.324  
7.297  
7.256  
7.239  
7.230  
7.201  
7.176  
7.151  
6.916  
6.891  
6.865  
6.806  
6.797  
6.767  
6.600  
6.574  
5.804  
5.782  
5.772  
5.749  
5.476  
5.452  
5.428

3.673  
3.643  
3.561  
3.532  
3.502

2.346

0.011  
-0.000

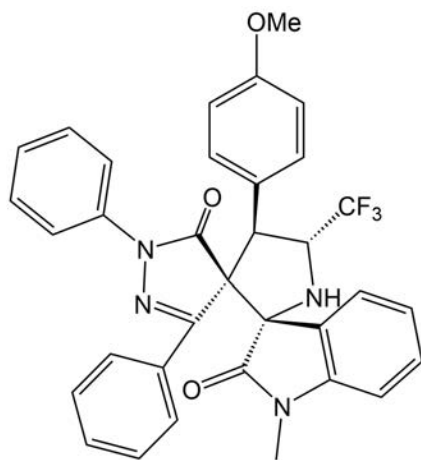

3fa

<sup>1</sup>H NMR (300 MHz, CDCl<sub>3</sub>)

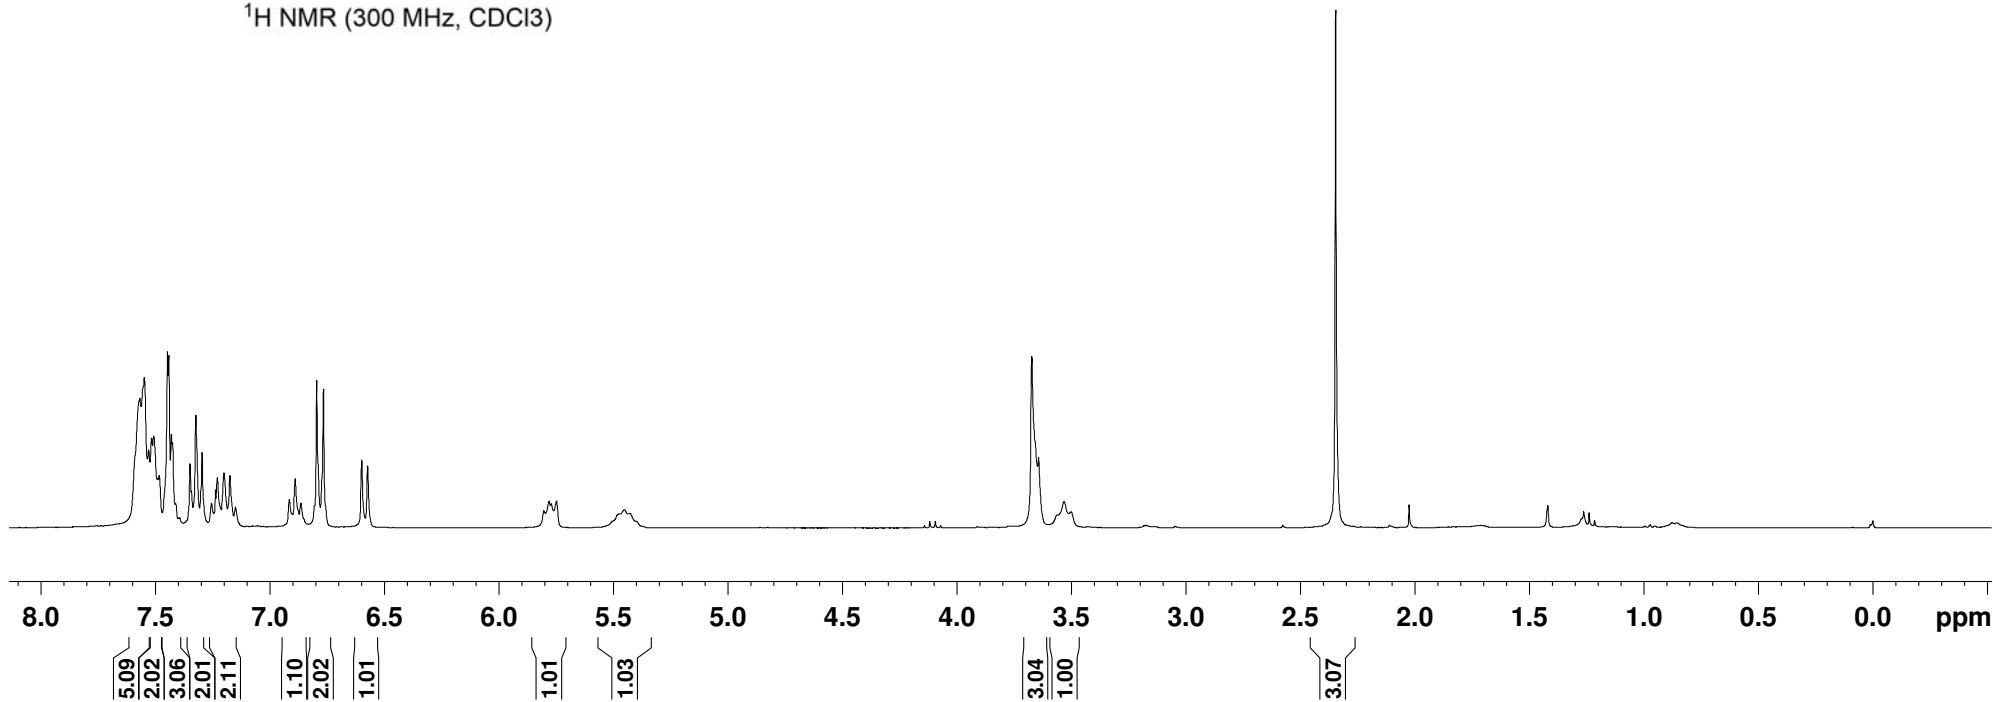

173.90  
170.73  
159.41  
154.99  
143.67  
136.62  
131.66  
130.97  
130.95  
130.30  
129.62  
128.80  
128.68  
128.00  
126.15  
124.60  
124.30  
124.24  
122.98  
122.81  
120.52  
119.99  
114.23  
108.08

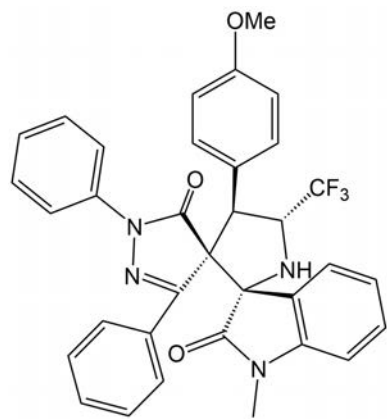

**3fa**  
<sup>13</sup>C NMR (75 MHz, CDCl<sub>3</sub>)

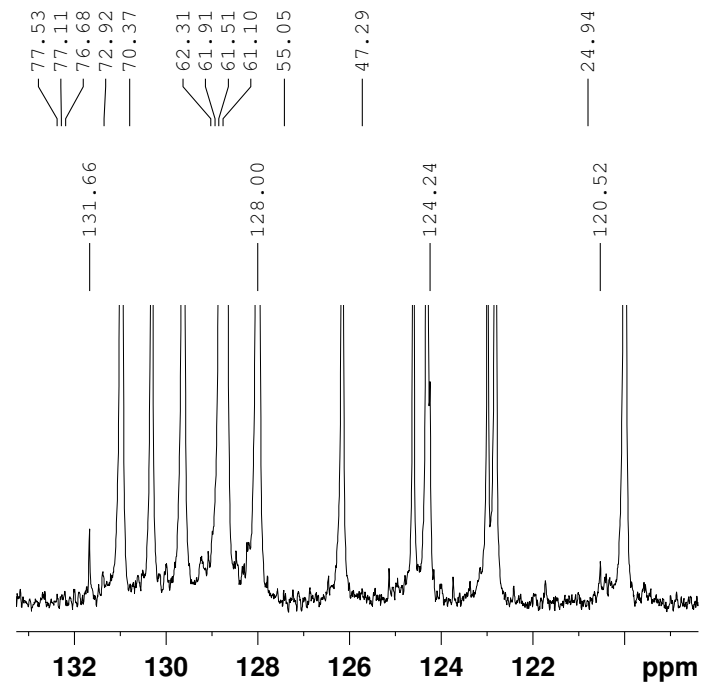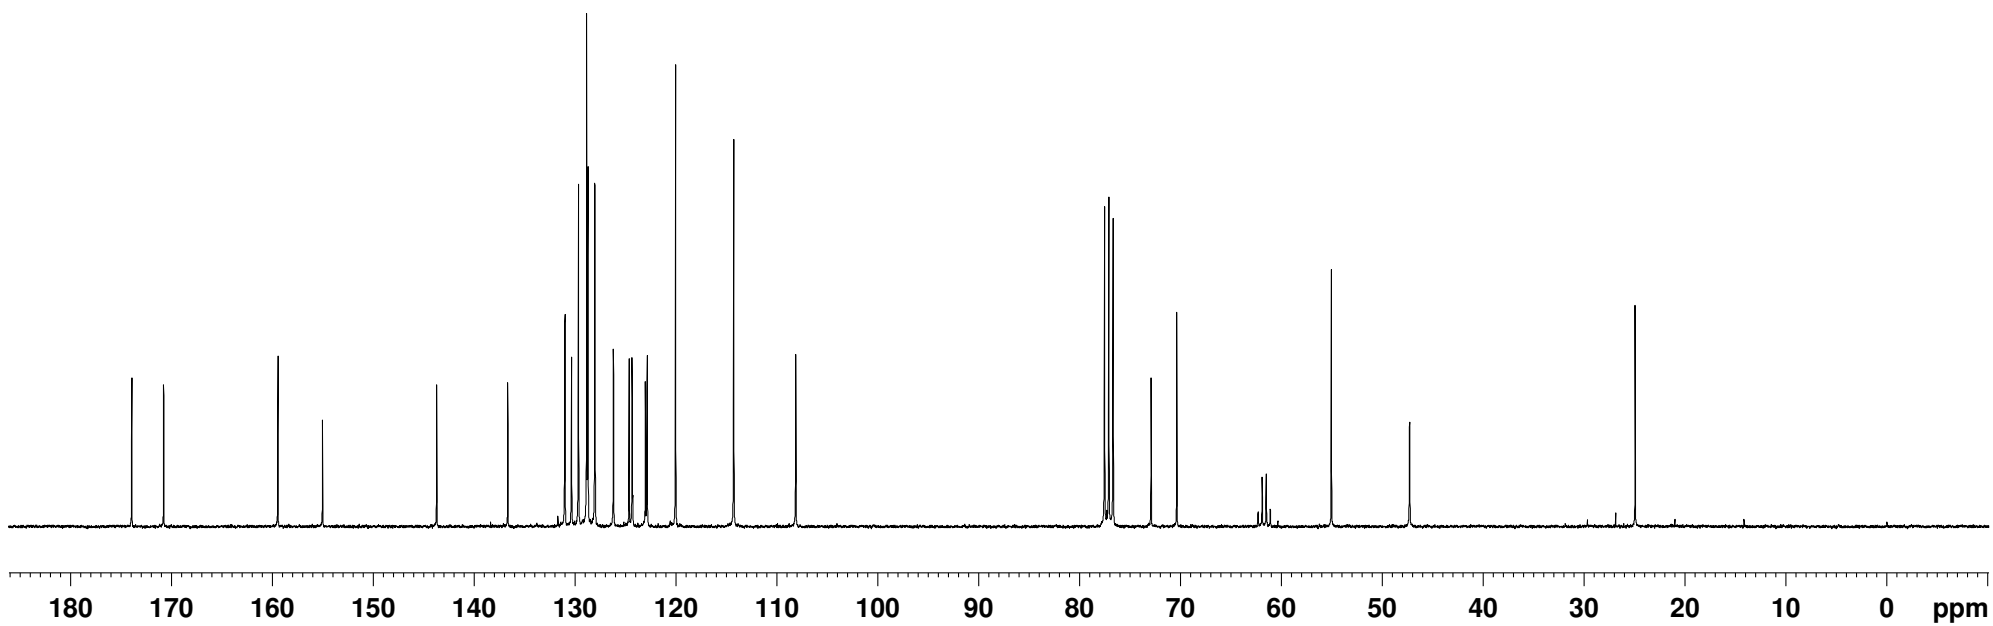

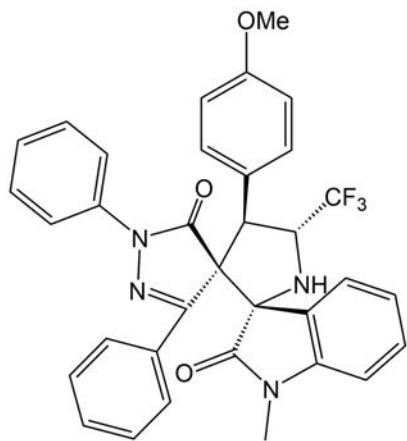

**3fa**

<sup>19</sup>F NMR (282 MHz, CDCl<sub>3</sub>)

— -71.996

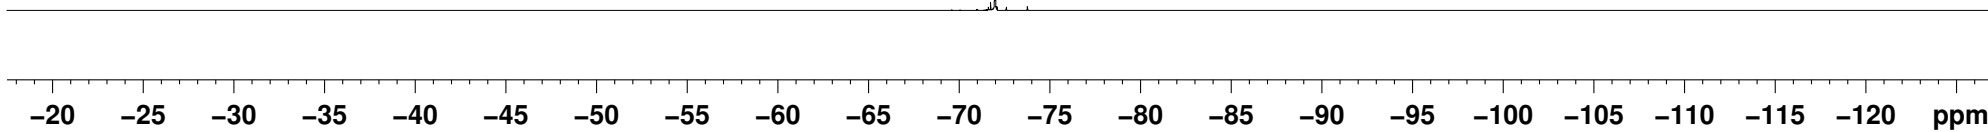

7.424  
7.399  
7.390  
7.383  
7.377  
7.372  
7.360  
7.335  
7.312  
7.307  
7.273  
7.268  
7.247  
7.243  
7.216  
7.213  
7.190  
7.166  
7.163  
6.958  
6.951  
6.923  
6.898  
6.872  
6.615  
6.589  
5.832  
5.813  
5.799  
5.780  
5.489  
5.469

3.568  
3.542  
3.517

2.351

0.059  
0.010  
-0.000

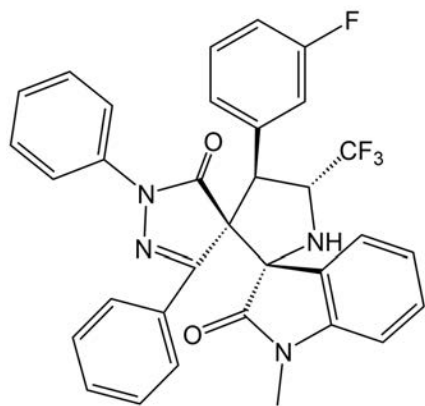

**3ga**

<sup>1</sup>H NMR (300 MHz, CDCl<sub>3</sub>)

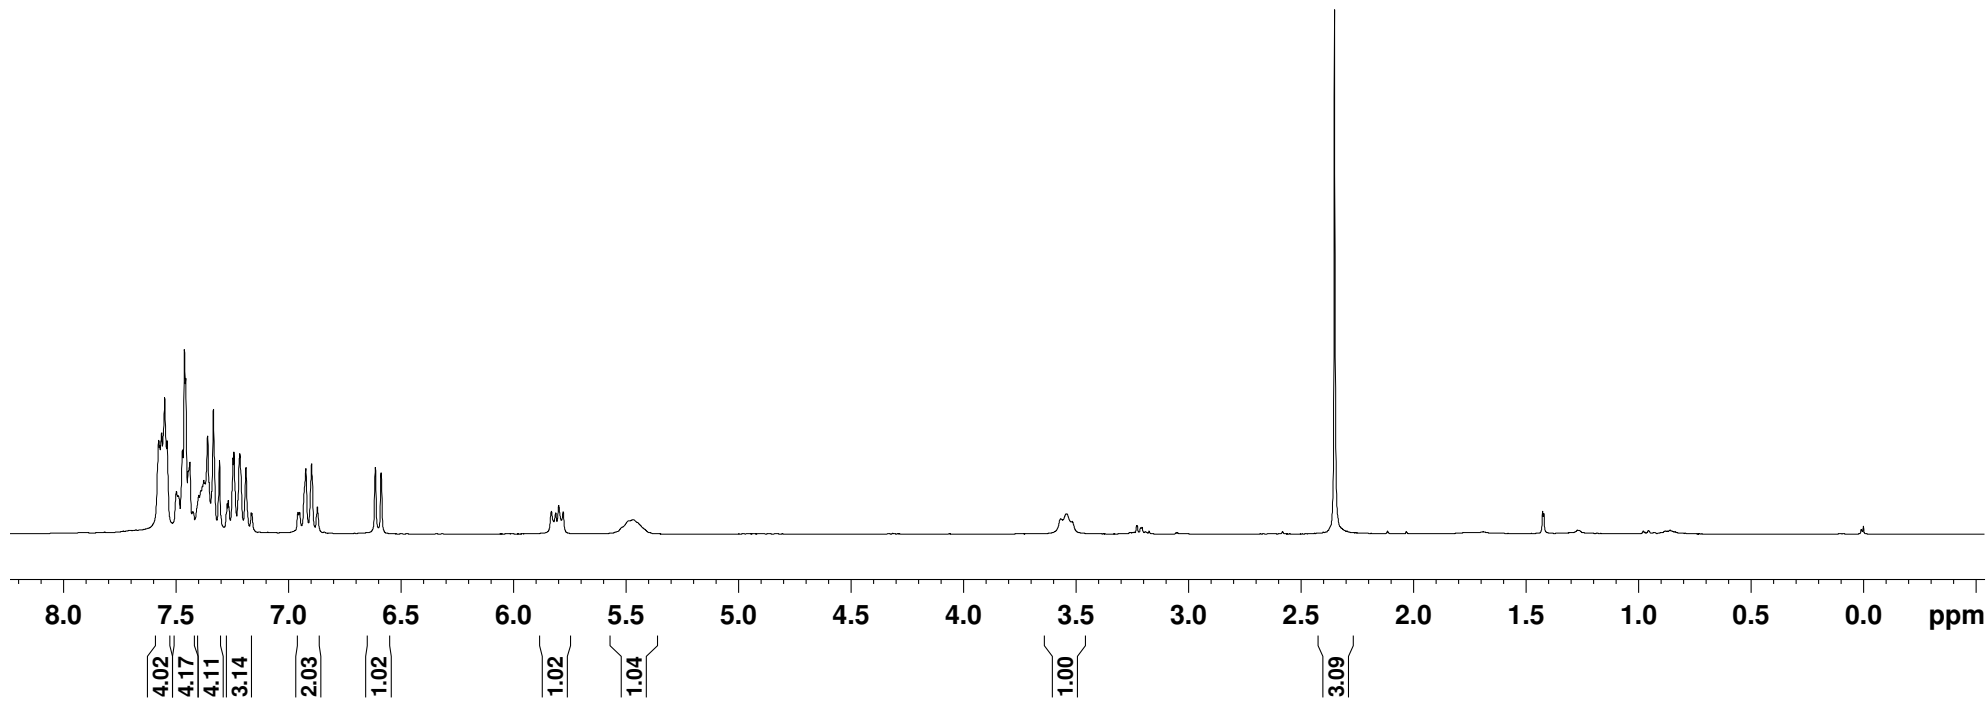

— 173.79  
 — 170.47  
 — 164.41  
 — 161.14  
 — 154.70  
 — 143.76  
 — 136.54  
 — 135.60  
 — 135.50  
 — 131.57  
 — 131.19  
 — 130.83  
 — 130.58  
 — 130.52  
 — 130.47  
 — 128.92  
 — 128.68  
 — 128.15  
 — 127.86  
 — 126.38  
 — 124.50  
 — 124.46  
 — 124.38  
 — 124.14  
 — 122.96  
 — 122.72  
 — 120.43  
 — 120.07  
 — 115.76  
 — 115.50  
 — 115.45  
 — 108.23

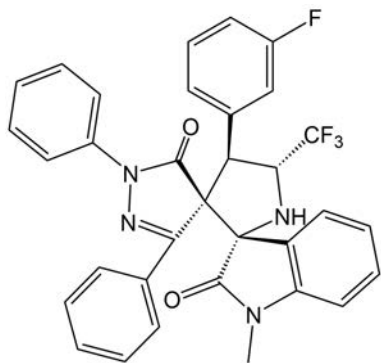

**3ga**

<sup>13</sup>C NMR (75 MHz, CDCl<sub>3</sub>)

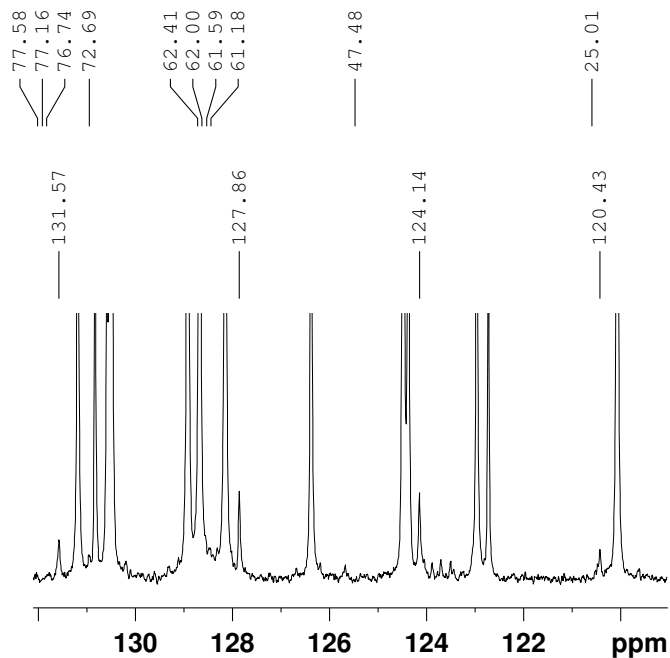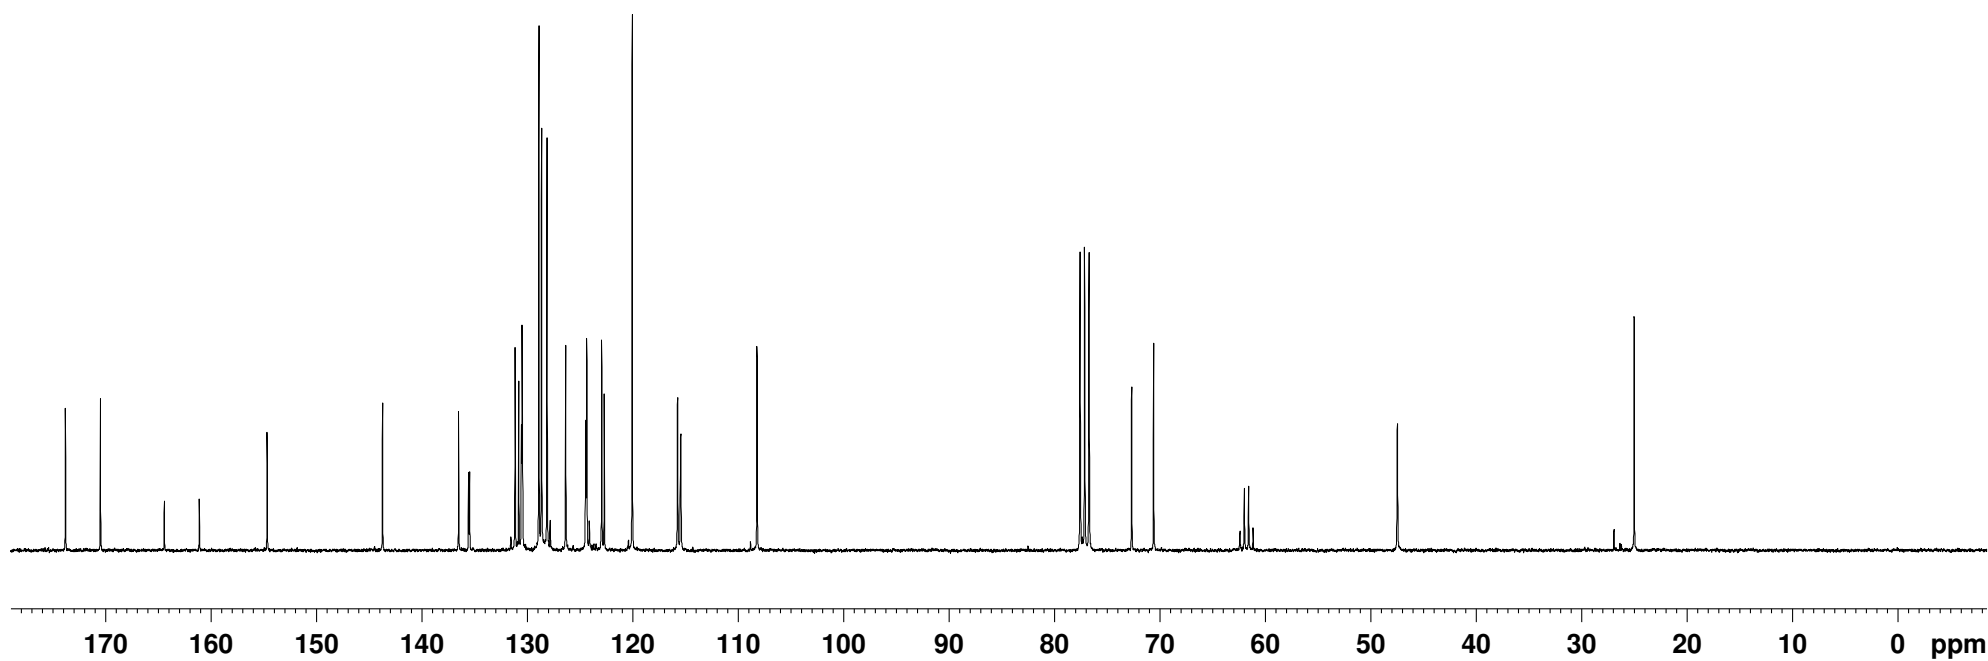



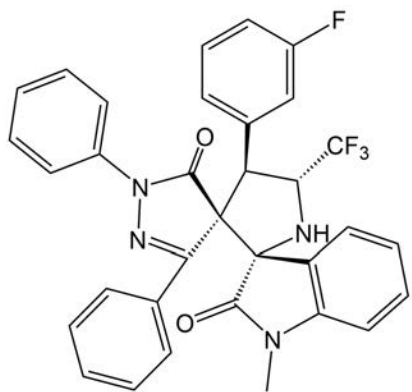

**3ga**

<sup>19</sup>F NMR (282 MHz, CDCl<sub>3</sub>)

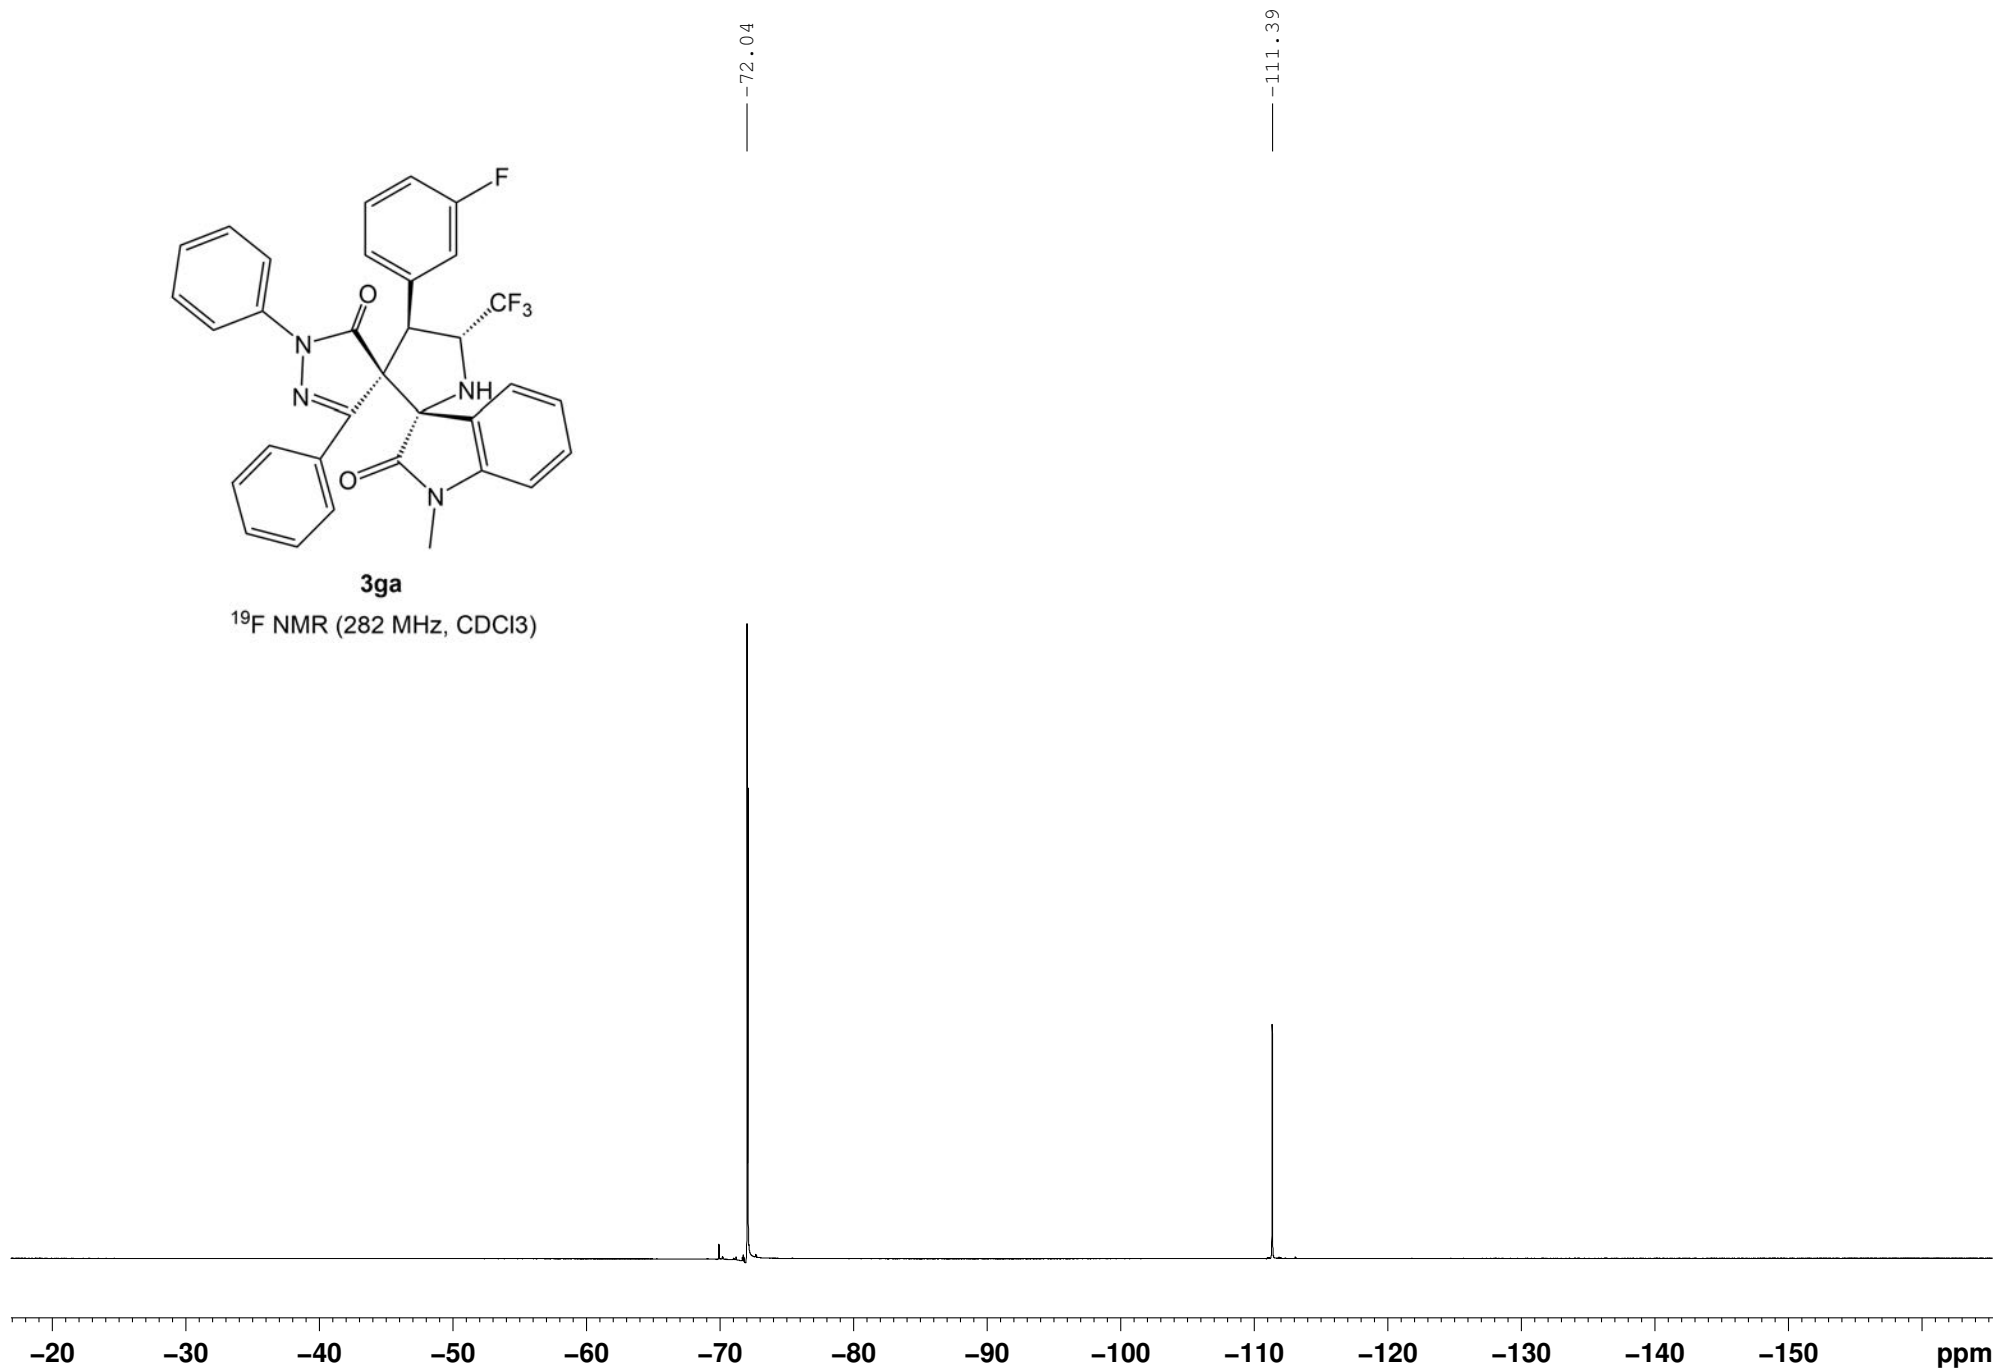

7.470  
7.453  
7.447  
7.436  
7.429  
7.418  
7.413  
7.358  
7.333  
7.305  
7.264  
7.261  
7.239  
7.235  
7.211  
7.192  
7.186  
7.172  
7.162  
7.146  
6.913  
6.911  
6.887  
6.862  
6.604  
6.579  
5.793  
5.759  
5.520  
5.496  
5.464  
5.439  
5.414  
5.407  
5.382

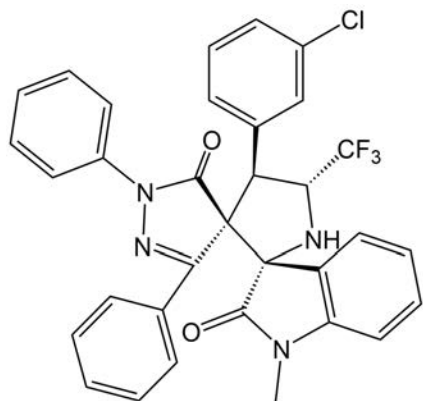

**3ha**

<sup>1</sup>H NMR (300 MHz, CDCl<sub>3</sub>)

3.557  
3.524

2.342

-0.000

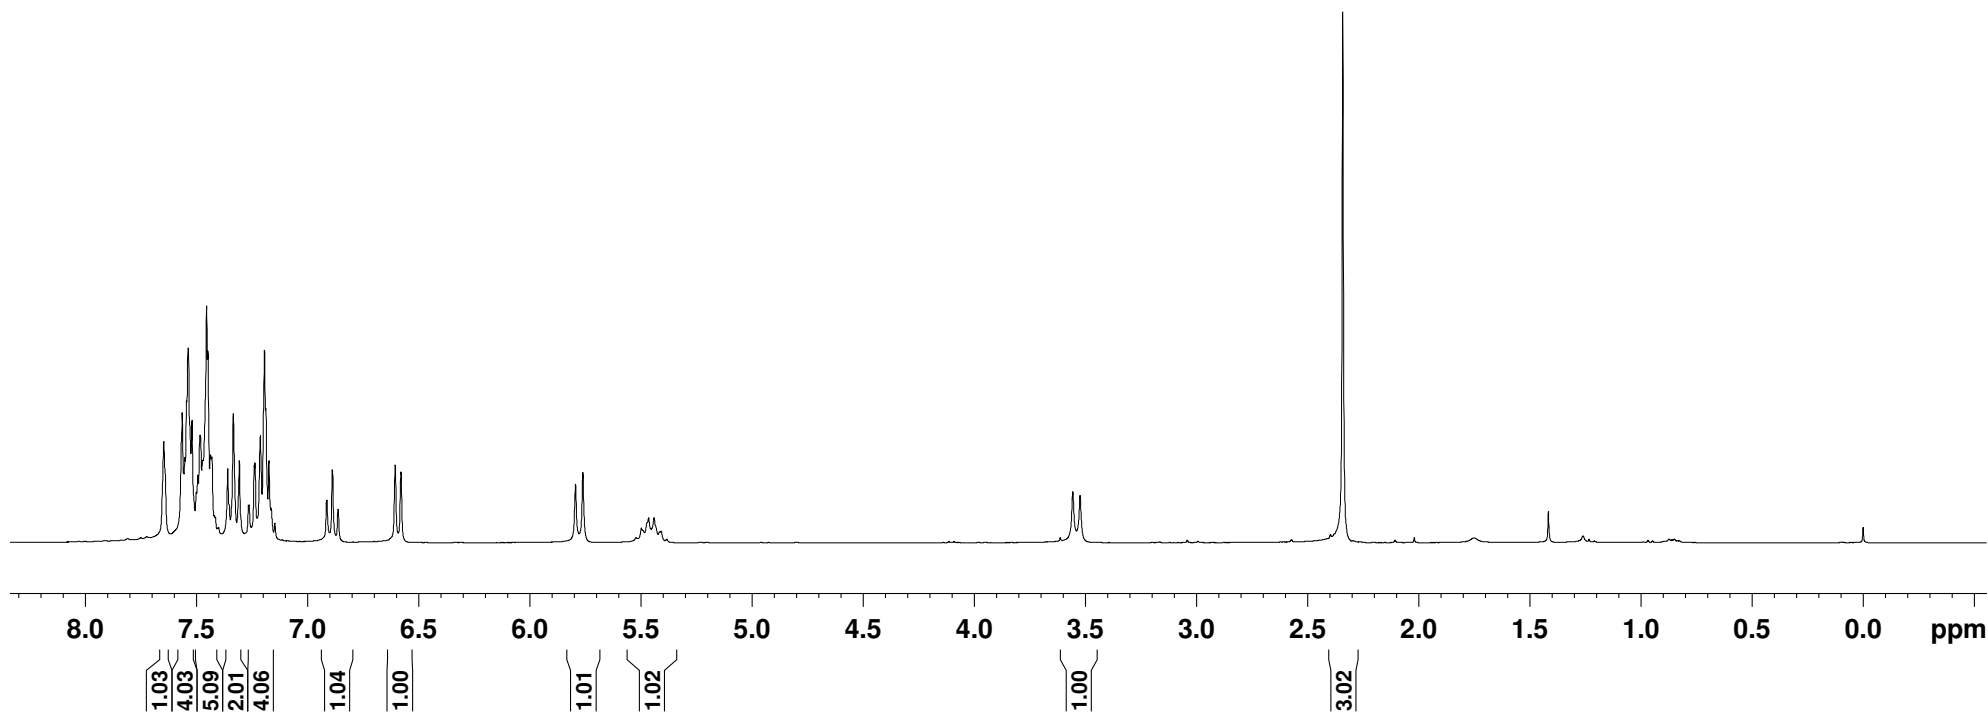

173.70  
170.39  
154.64  
143.68  
136.41  
135.04  
134.70  
131.46  
131.12  
130.73  
130.46  
130.18  
128.87  
128.79  
128.60  
128.09  
127.74  
126.86  
126.37  
124.35  
124.03  
122.93  
122.65  
120.31  
108.17

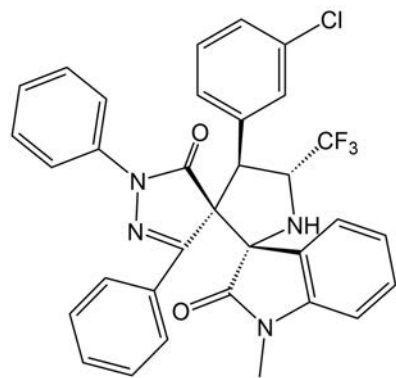

**3ha**

<sup>13</sup>C NMR (75 MHz, CDCl<sub>3</sub>)

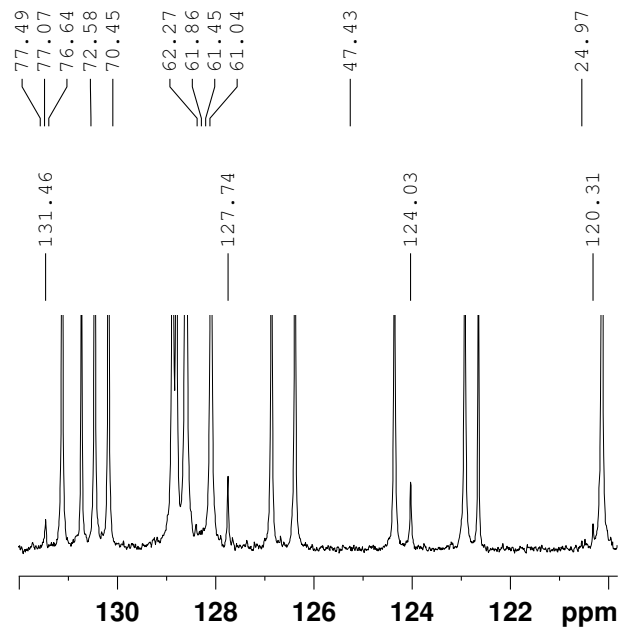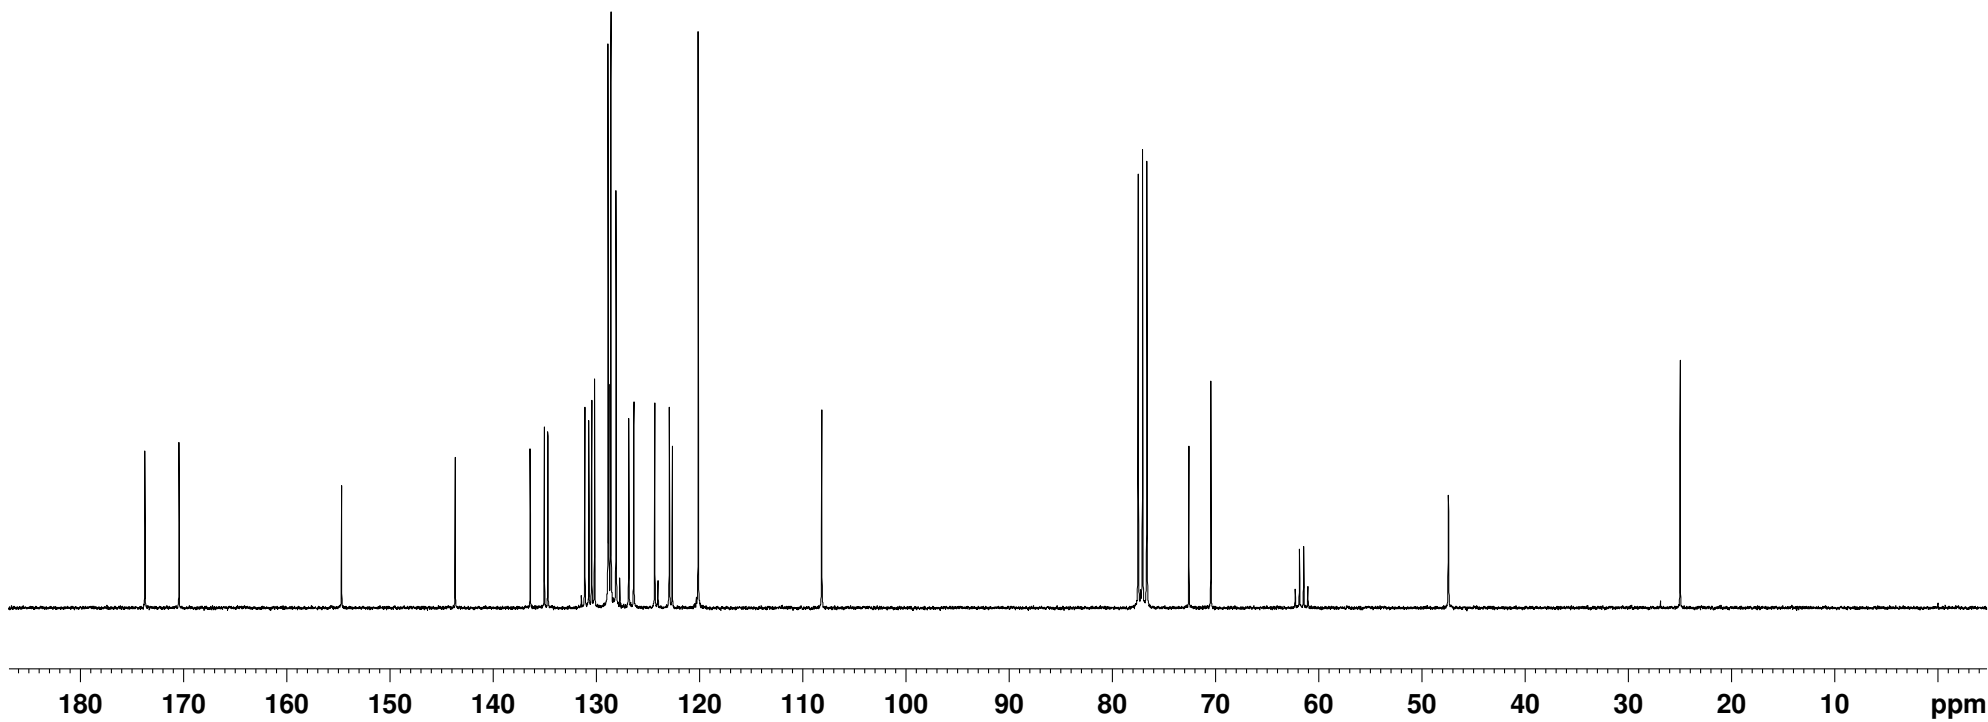

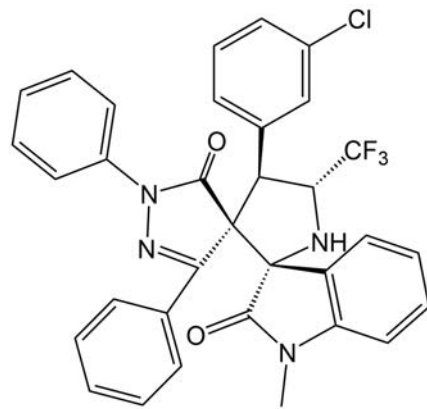

**3ha**

$^{19}\text{F}$  NMR (282 MHz,  $\text{CDCl}_3$ )

— -72.00

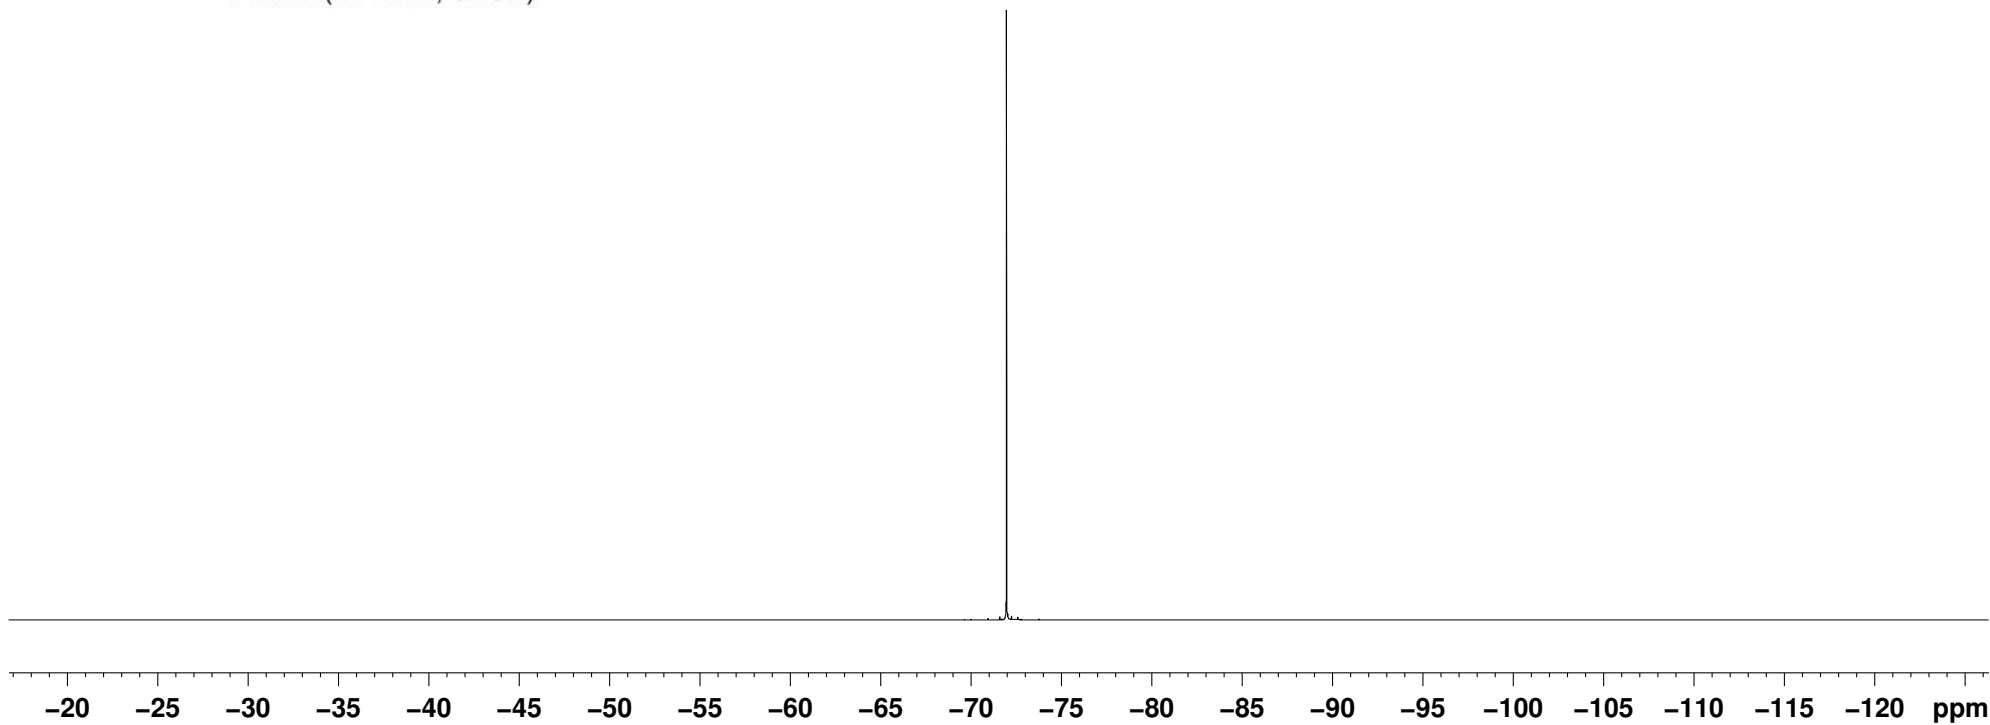

7.480  
7.467  
7.444  
7.427  
7.414  
7.383  
7.357  
7.329  
7.295  
7.272  
7.269  
7.256  
7.243  
7.215  
7.190  
7.169  
7.142  
7.116  
6.943  
6.918  
6.893  
6.628  
6.602  
5.765  
5.731  
5.478  
5.469  
5.453  
5.445  
5.420  
5.412  
5.396  
5.388

3.532  
3.499

2.362

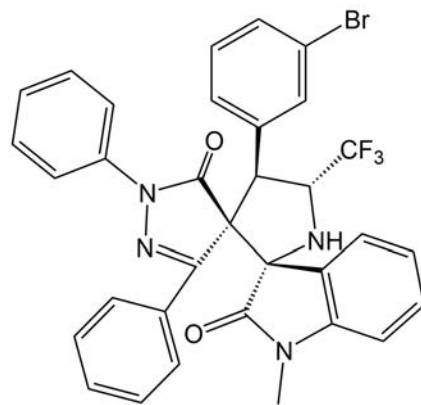

**3ia**

<sup>1</sup>H NMR (300 MHz, CDCl<sub>3</sub>)

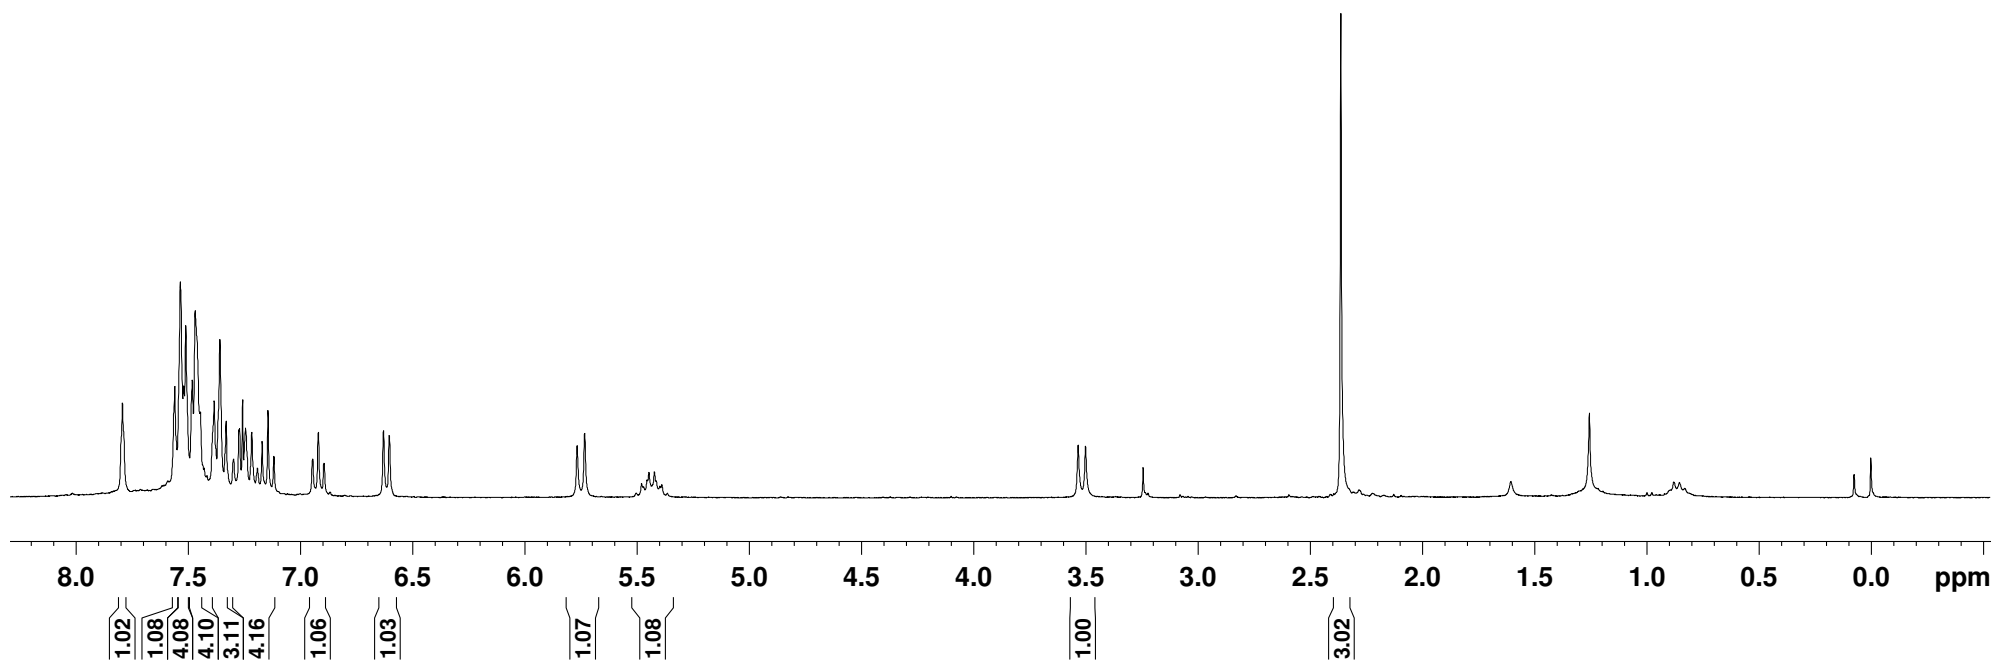

— 173.75  
 — 170.46  
 — 154.73  
 — 143.76  
 — 136.48  
 — 135.41  
 — 131.79  
 — 131.54  
 — 131.18  
 — 130.80  
 — 130.51  
 — 128.93  
 — 128.66  
 — 128.14  
 — 127.82  
 — 127.43  
 — 126.45  
 — 124.44  
 — 124.11  
 — 122.98  
 — 122.96  
 — 122.72  
 — 120.64  
 — 120.24  
 — 108.23

— 77.59  
 — 77.17  
 — 76.74  
 — 72.68  
 — 70.50  
 — 62.37  
 — 61.96  
 — 61.56  
 — 61.14  
 — 47.49  
 — 25.03

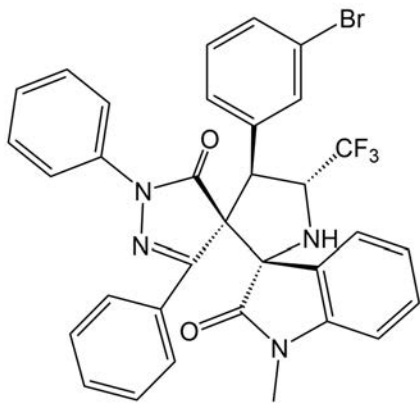

**3ia**

$^{13}\text{C}$  NMR (75 MHz,  $\text{CDCl}_3$ )

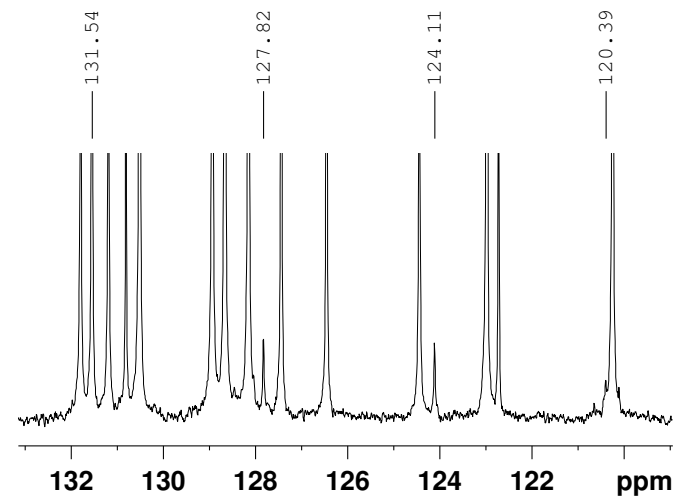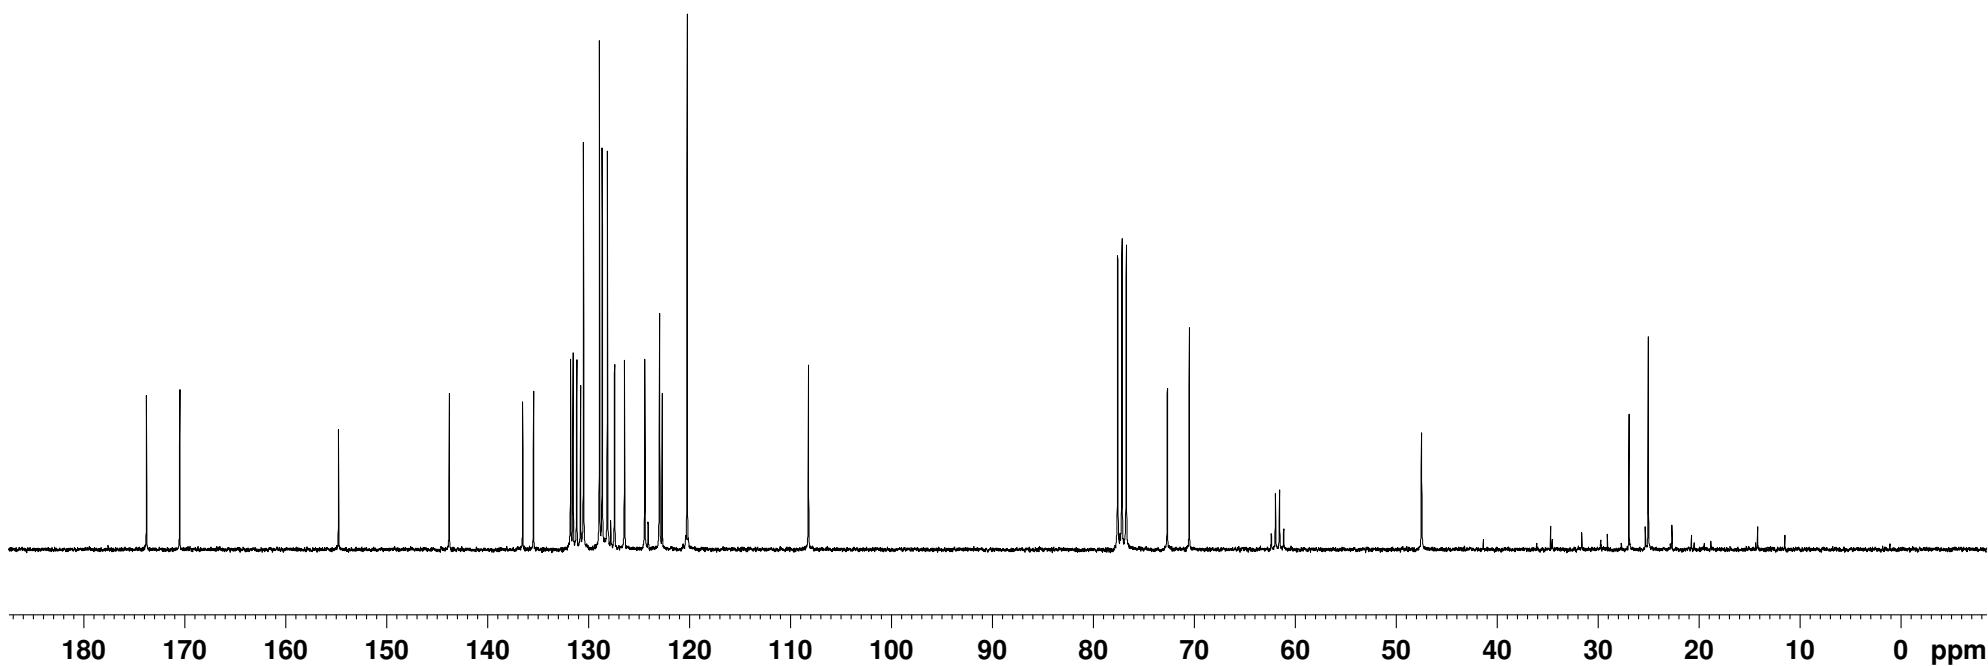

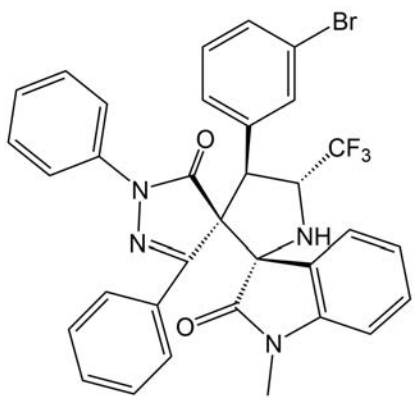

3ia

<sup>19</sup>F NMR (282 MHz, CDCl<sub>3</sub>)

— -71.946

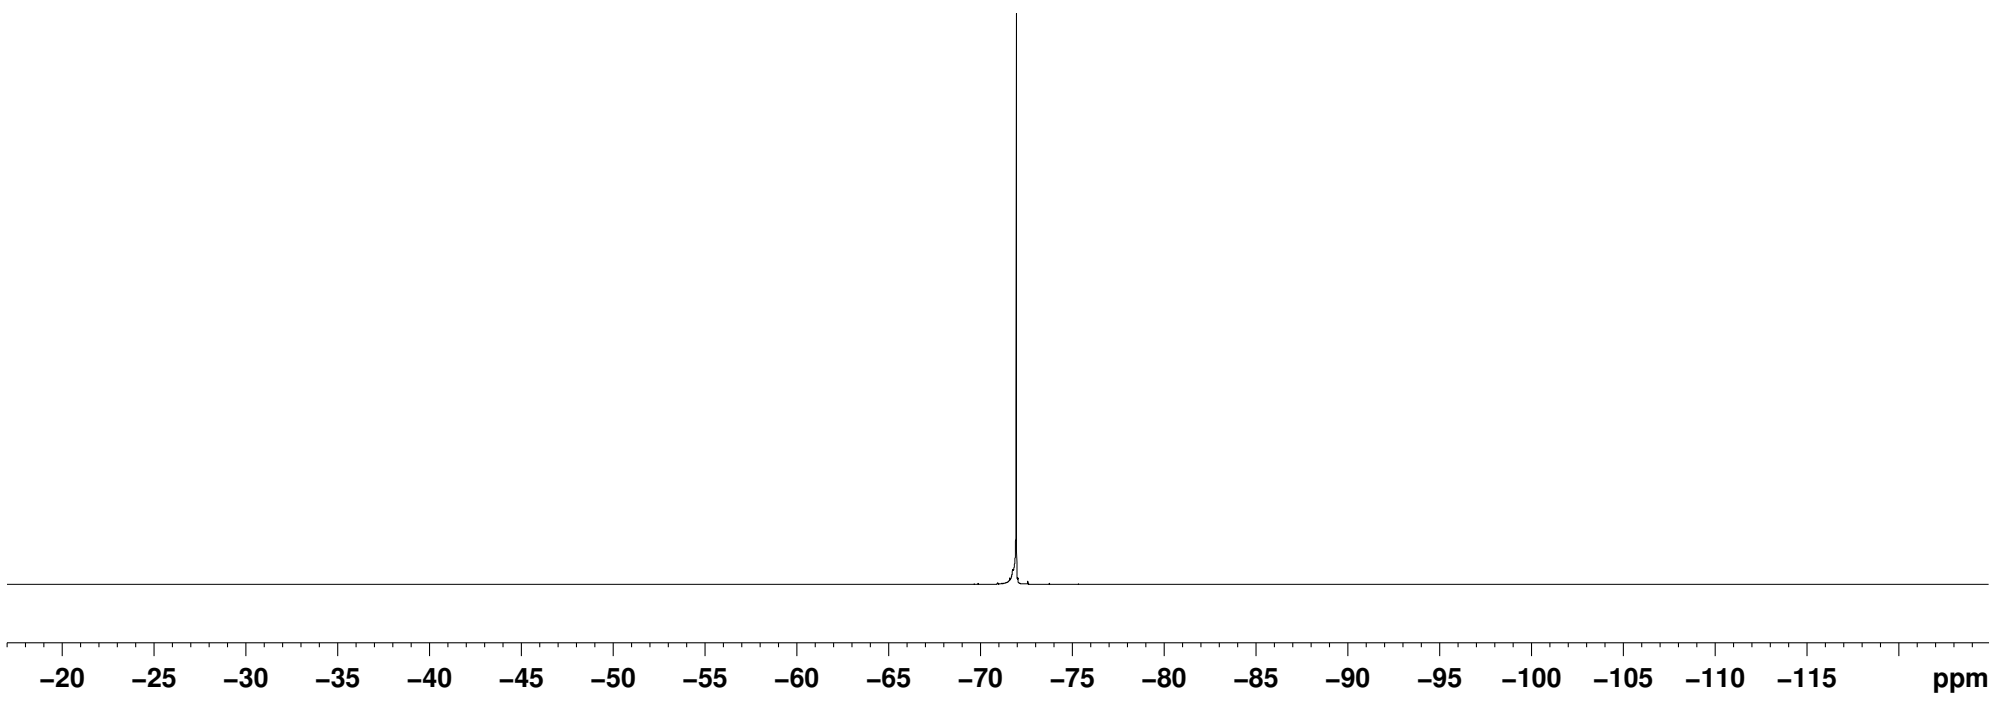

7.431  
7.420  
7.415  
7.393  
7.363  
7.337  
7.310  
7.286  
7.254  
7.234  
7.219  
7.195  
7.171  
7.147  
7.122  
7.041  
7.017  
6.942  
6.917  
6.891  
6.616  
6.590  
5.767  
5.733  
5.530  
5.505  
5.473  
5.448  
5.423  
5.416  
5.391

3.531  
3.499

2.353  
2.243

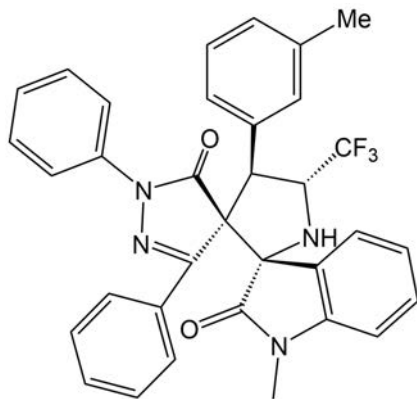

**3ja**

<sup>1</sup>H NMR (300 MHz, CDCl<sub>3</sub>)

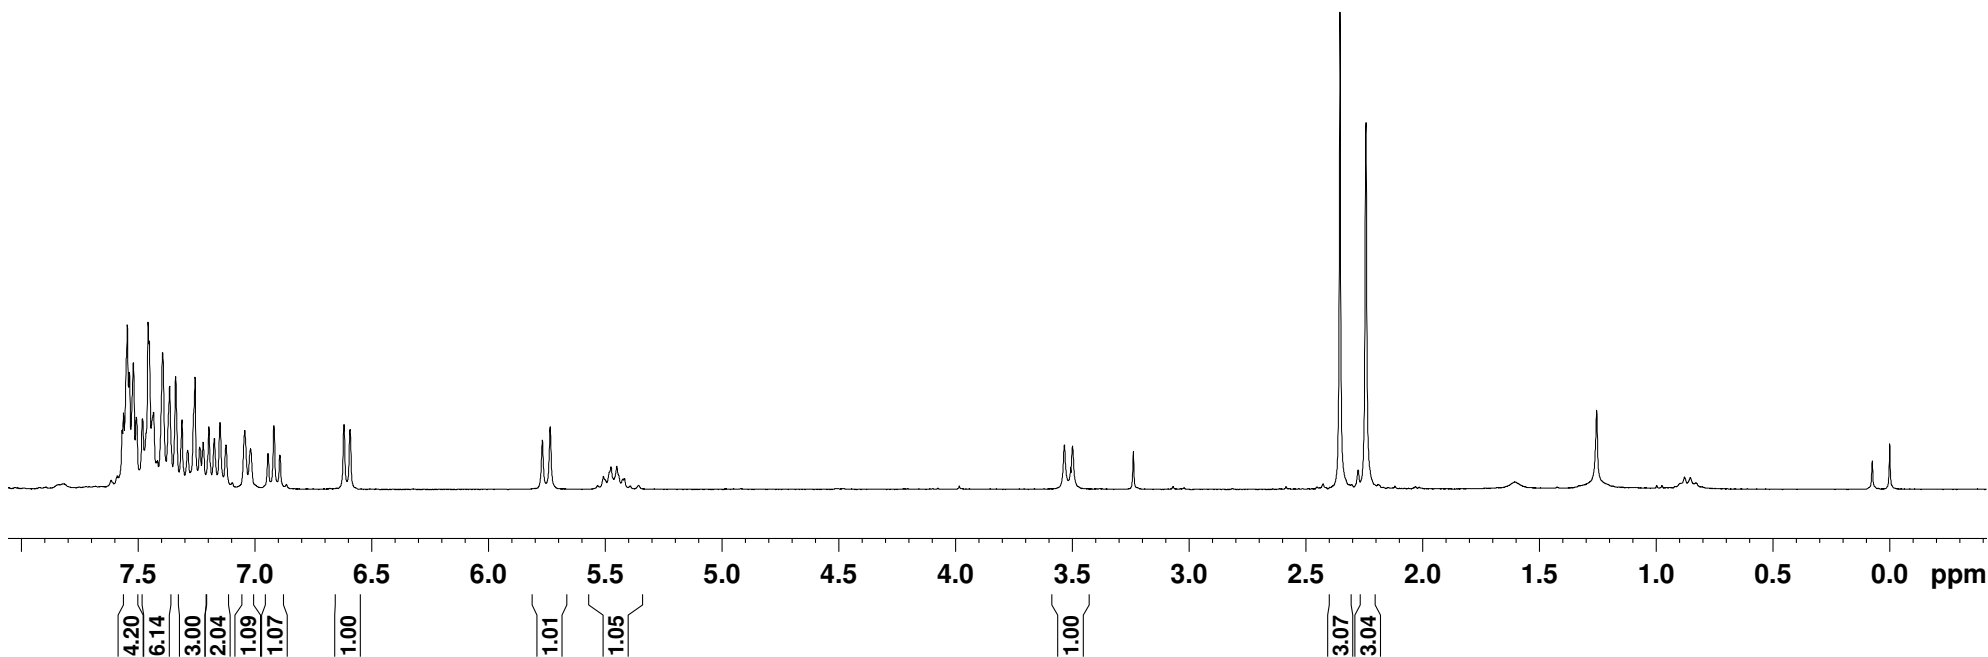



— 173.84  
 — 170.71  
 — 155.01  
 — 143.69  
 — 138.42  
 — 136.61  
 — 132.70  
 — 131.65  
 — 130.96  
 — 130.94  
 — 130.28  
 — 129.26  
 — 129.09  
 — 128.78  
 — 128.70  
 — 127.97  
 — 126.17  
 — 125.58  
 — 124.39  
 — 124.22  
 — 122.96  
 — 122.82  
 — 120.51  
 — 120.05  
 — 108.06

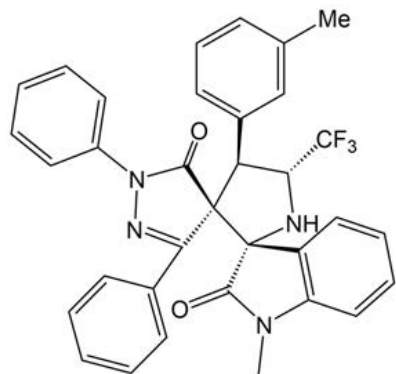

**3ja**

<sup>13</sup>C NMR (75 MHz, CDCl<sub>3</sub>)

77.52  
 77.10  
 76.67  
 72.80  
 70.33  
 62.21  
 61.80  
 61.40  
 60.99  
 47.93  
 24.93  
 21.43

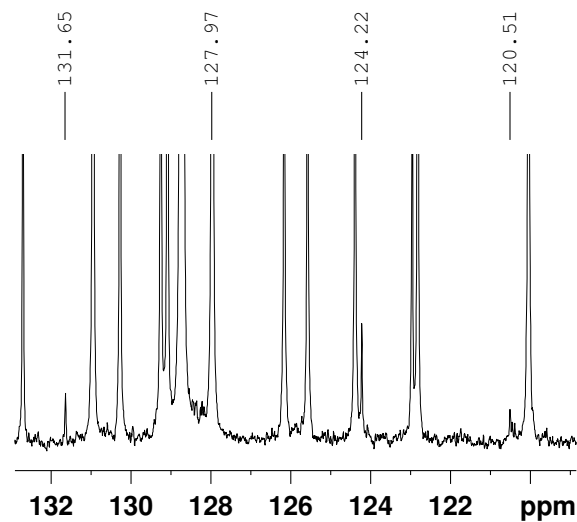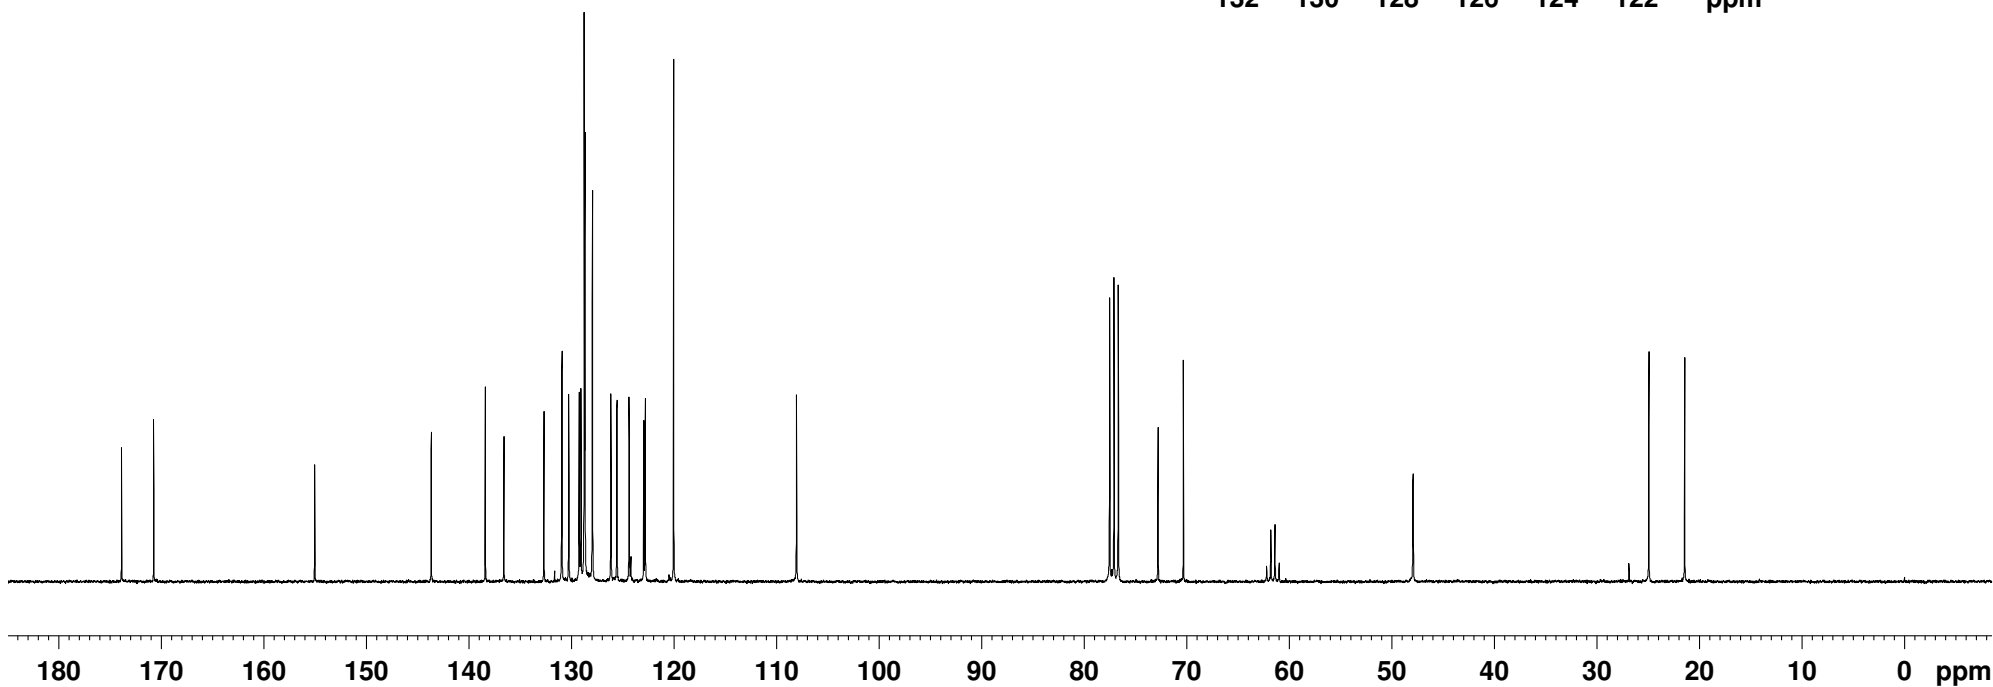

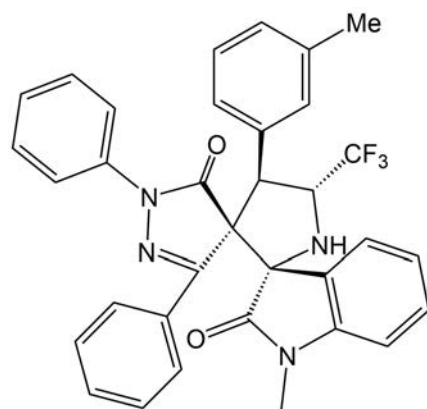

**3ja**

<sup>19</sup>F NMR (282 MHz, CDCl<sub>3</sub>)

-71.879

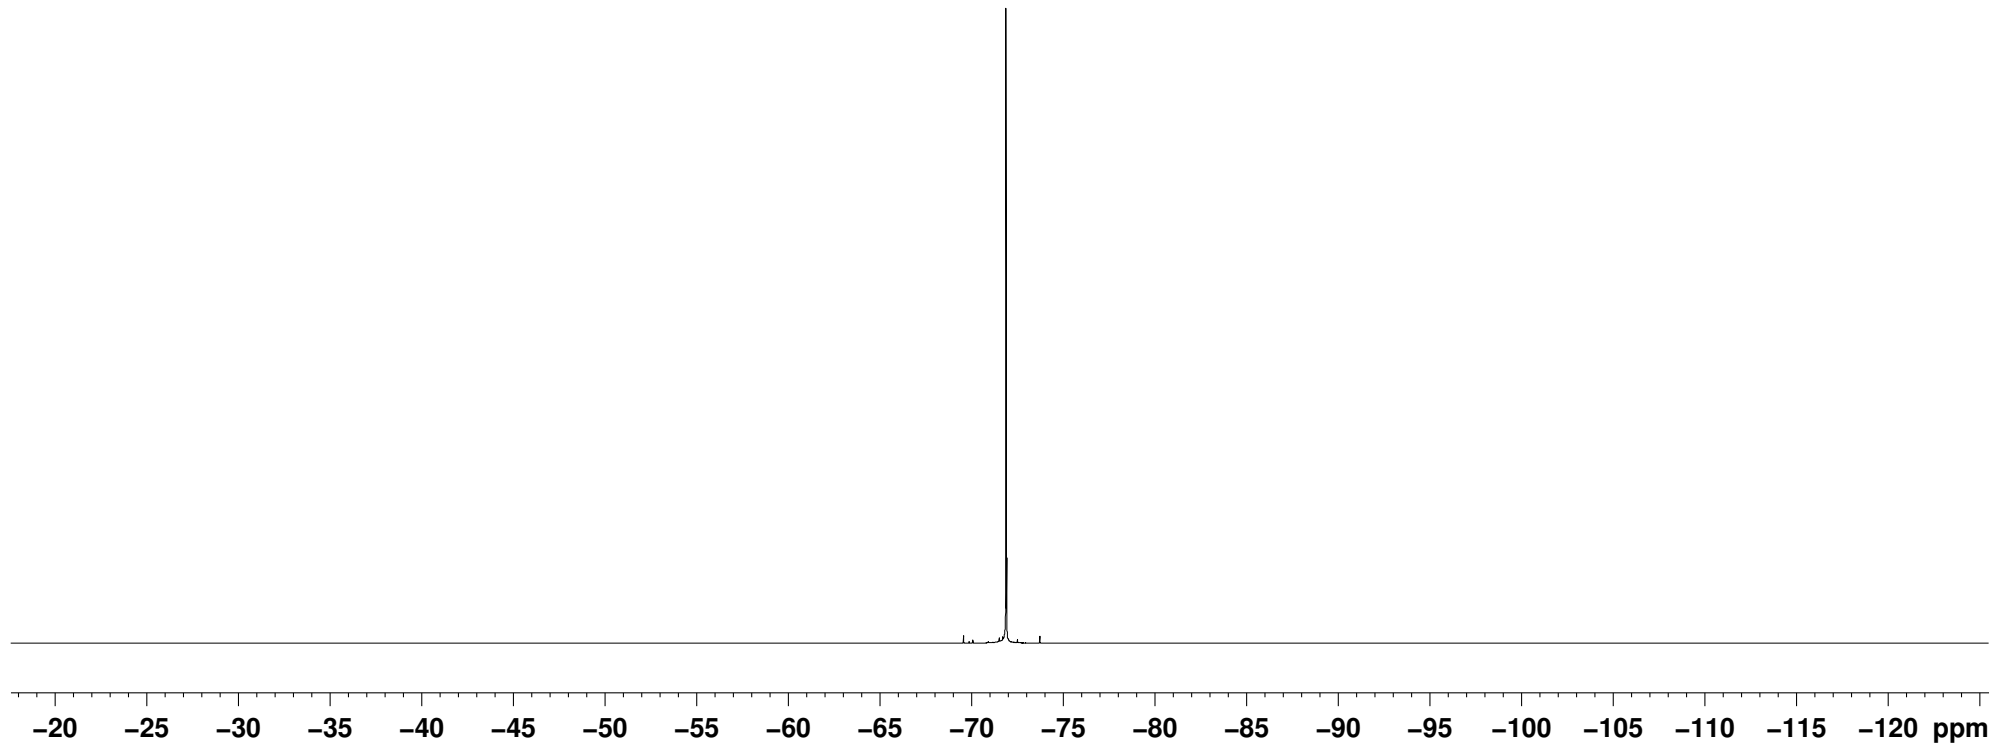

7.283  
7.236  
7.225  
7.210  
7.197  
7.171  
7.159  
7.149  
7.134  
7.123  
6.989  
6.896  
6.871  
6.845  
6.805  
6.781  
6.747  
6.740  
6.722  
6.653  
6.641  
6.584  
6.558  
6.469  
6.445  
6.381  
5.803  
5.770  
5.542  
5.517  
5.487  
5.462  
5.432  
5.406  
5.352

3.595  
3.565  
3.533

2.331

-0.000

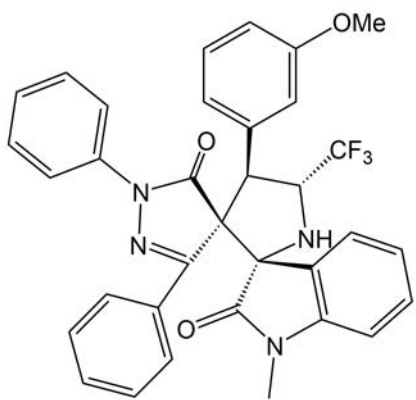

**3ka**

<sup>1</sup>H NMR (300 MHz, CDCl<sub>3</sub>)

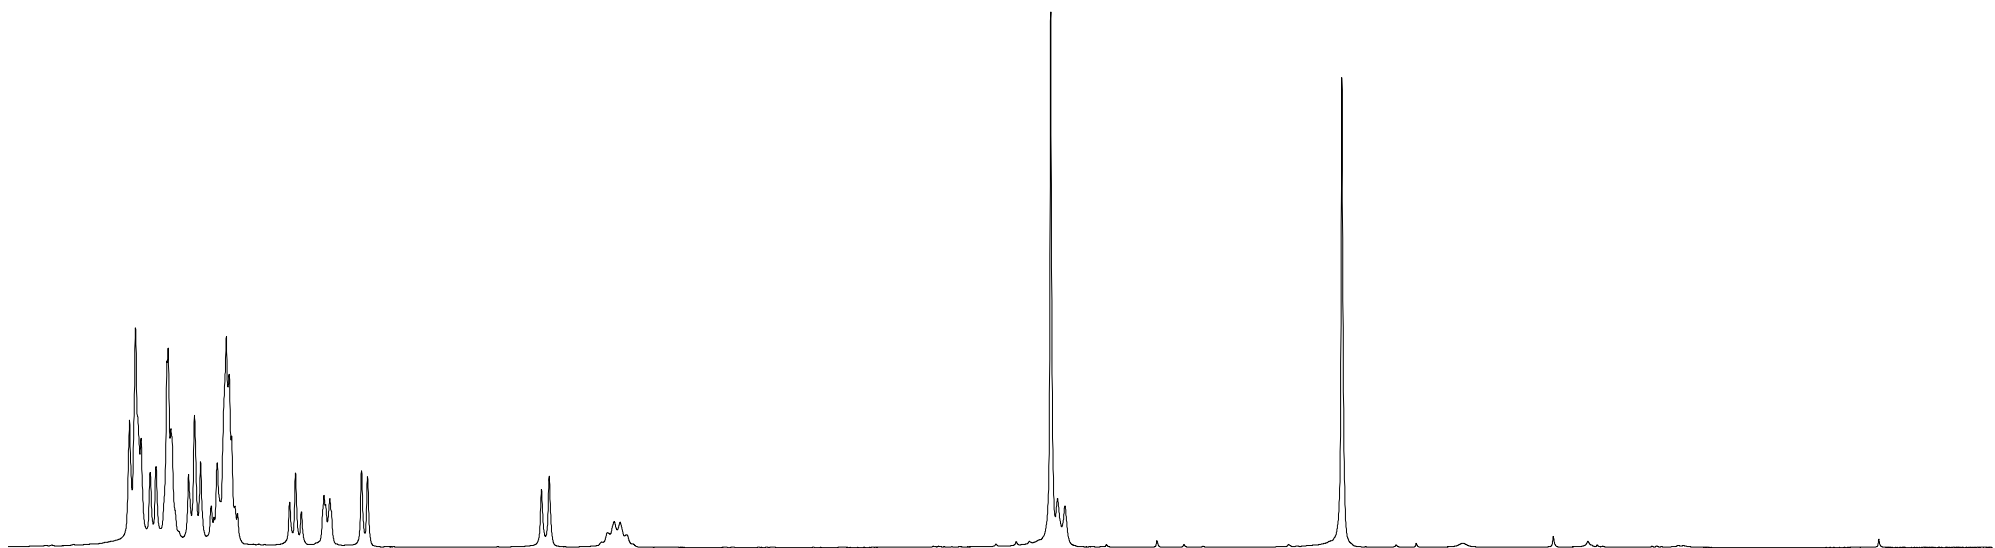

8.0 7.5 7.0 6.5 6.0 5.5 5.0 4.5 4.0 3.5 3.0 2.5 2.0 1.5 1.0 0.5 0.0 ppm

4.07  
1.09  
3.09  
2.12  
5.03  
1.07  
1.09  
1.05  
1.05  
1.08  
3.04  
1.00  
3.02

— 173.82  
 — 170.67  
 — 159.69  
 — 154.94  
 — 143.69  
 — 136.64  
 — 134.34  
 — 131.58  
 — 131.02  
 — 130.89  
 — 130.32  
 — 129.87  
 — 128.80  
 — 128.64  
 — 128.01  
 — 127.87  
 — 126.16  
 — 124.34  
 — 124.16  
 — 122.86  
 — 120.86  
 — 120.44  
 — 119.93  
 — 114.04  
 — 108.11

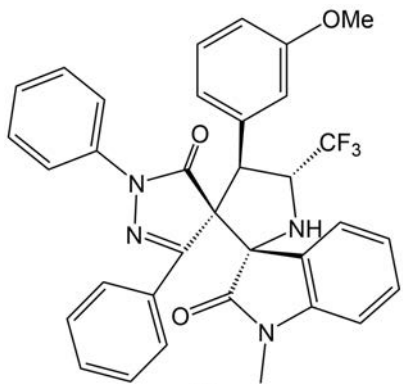

**3ka**

<sup>13</sup>C NMR (75 MHz, CDCl<sub>3</sub>)

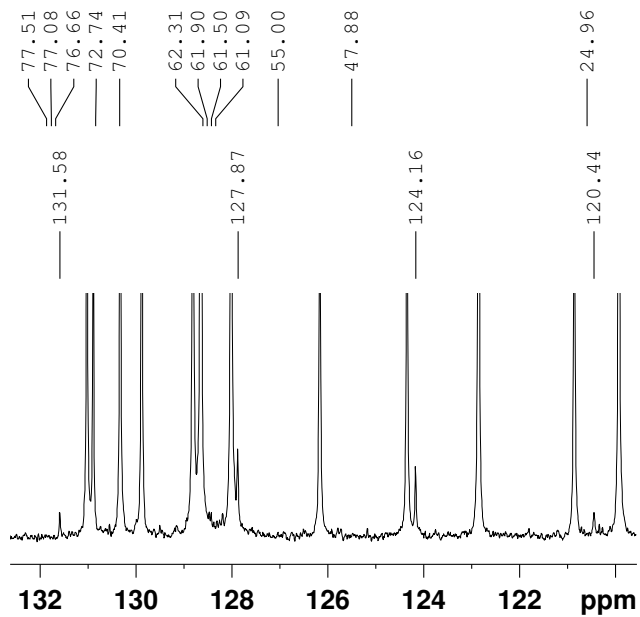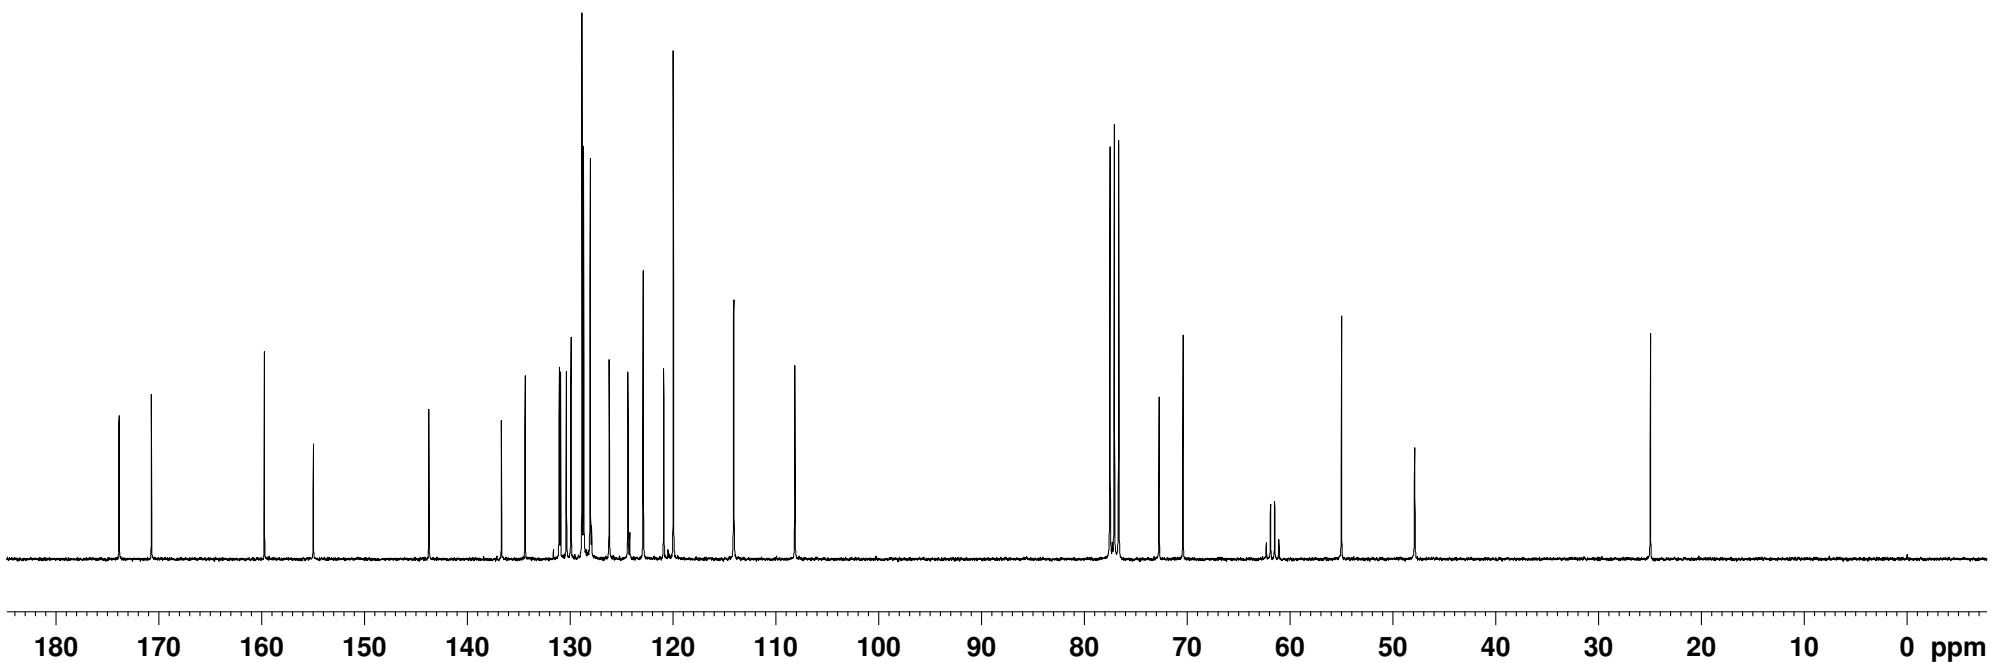

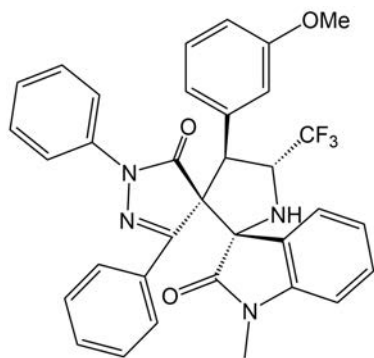

**3ka**

<sup>19</sup>F NMR (282 MHz, CDCl<sub>3</sub>)

— -71.95

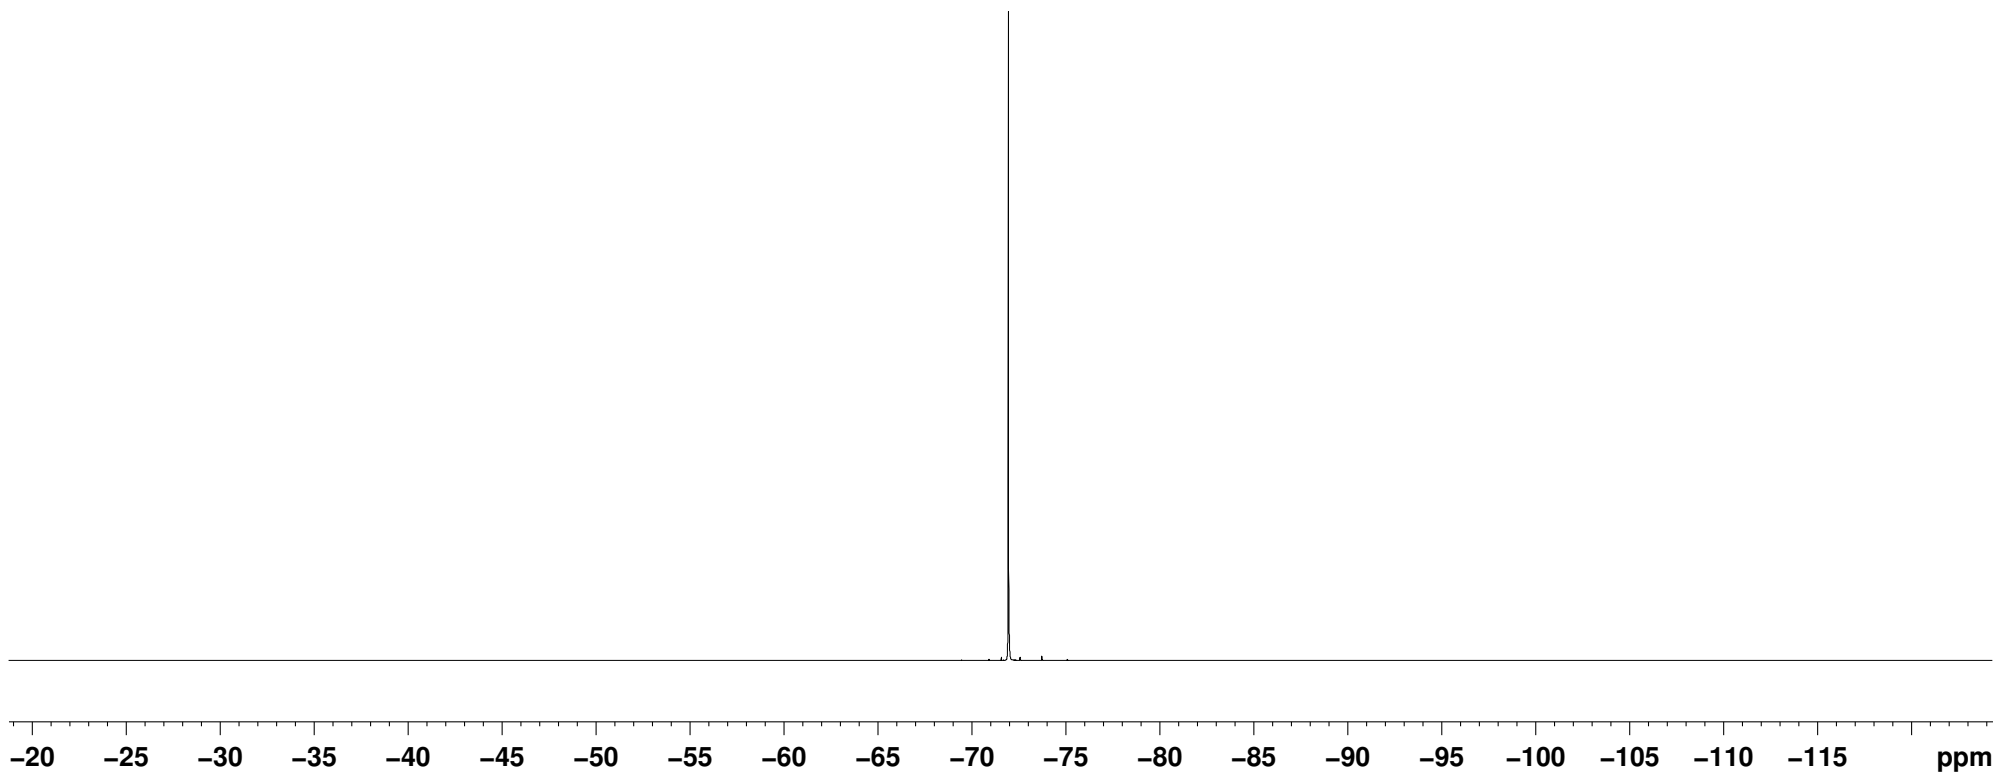

8.041  
7.863  
7.837  
7.776  
7.750  
7.716  
7.649  
7.624  
7.565  
7.540  
7.515  
7.441  
7.416  
7.389  
7.349  
7.323  
7.297  
7.280  
7.255  
7.230  
7.205  
7.181  
7.138  
7.106  
7.082  
7.029  
6.994  
6.970  
6.945  
6.919  
6.882  
6.656  
5.434  
5.409

3.700  
3.673

2.506

-0.000

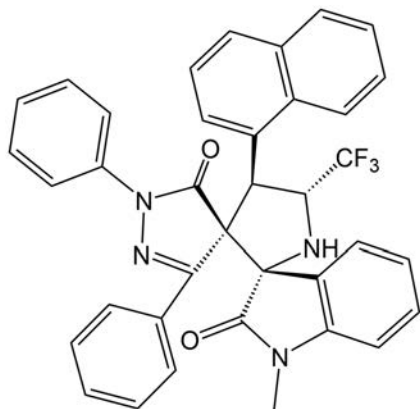

**3a**

<sup>1</sup>H NMR (300 MHz, CDCl<sub>3</sub>)

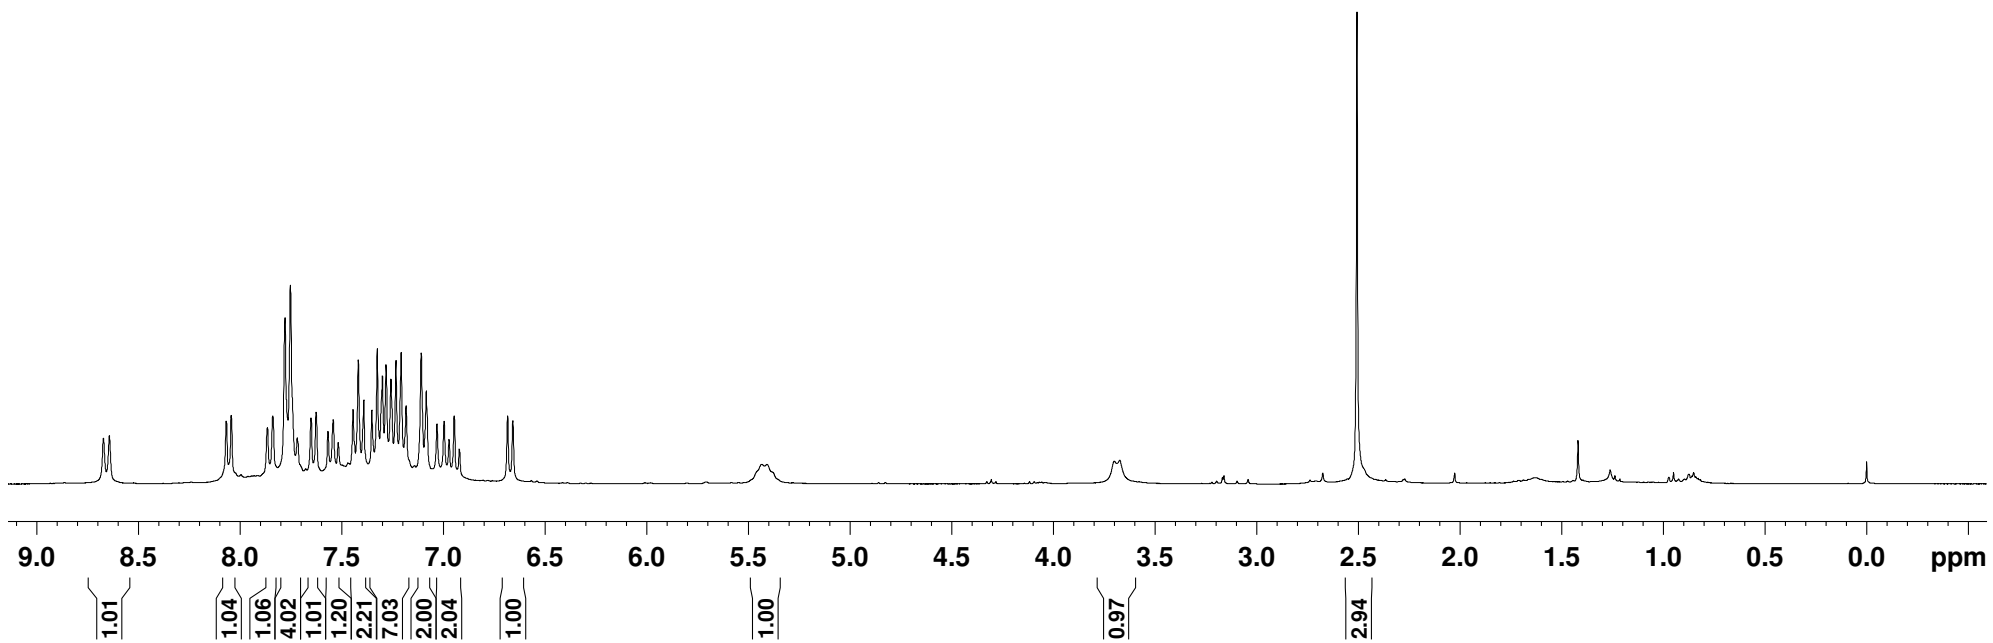

174.00  
171.68  
156.31  
143.87  
136.85  
134.38  
132.52  
131.59  
131.22  
130.54  
130.05  
129.82  
129.33  
129.28  
128.98  
128.53  
127.88  
127.79  
126.87  
126.34  
125.95  
125.43  
124.89  
124.60  
124.17  
123.25  
123.02  
122.75  
120.46  
120.08  
108.22

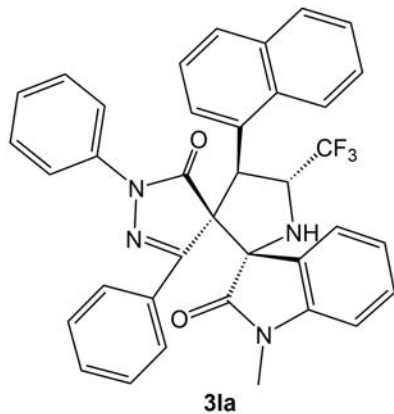

<sup>13</sup>C NMR (75 MHz, CDCl<sub>3</sub>)

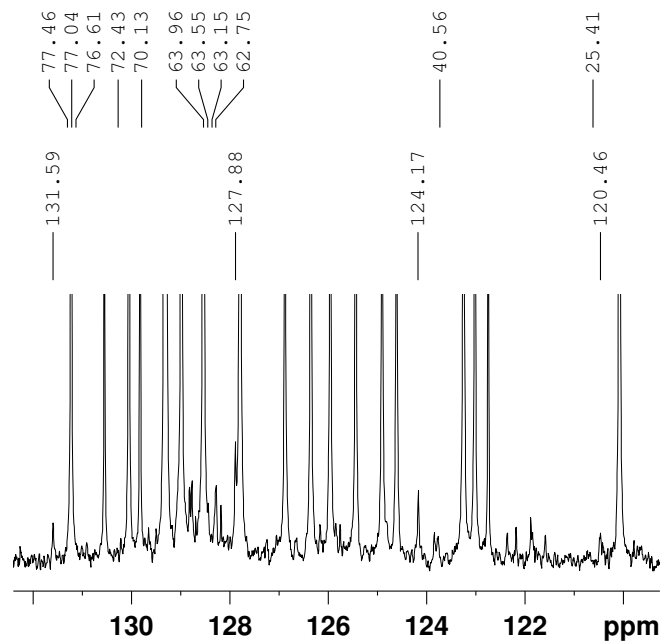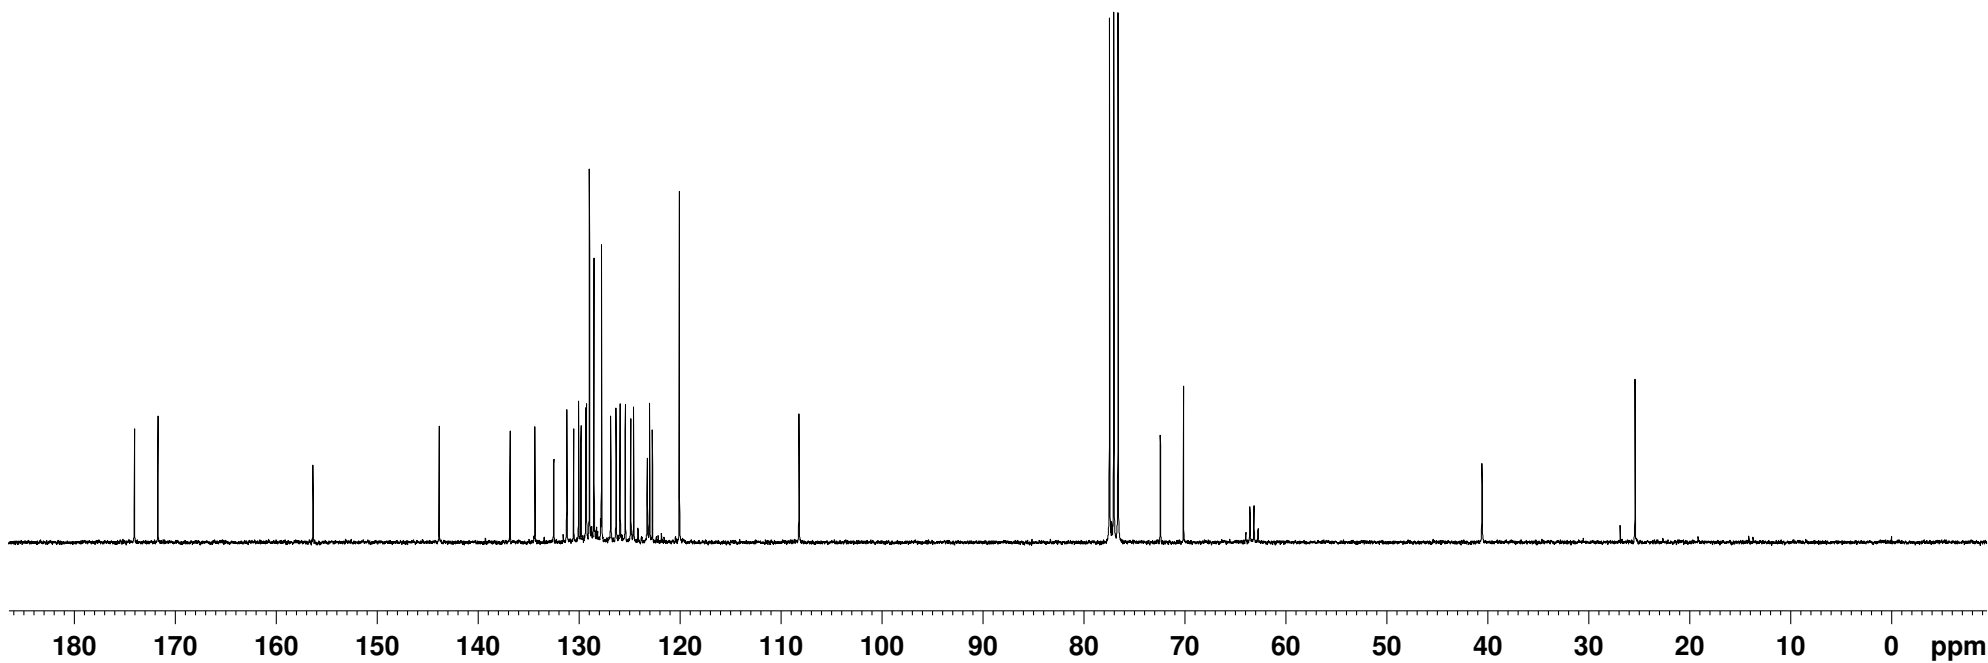

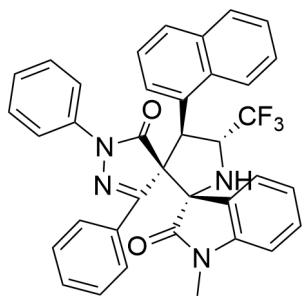

**3la**

$^{19}\text{F}$  NMR (282MHz,  $\text{CDCl}_3$ )

— -72.079

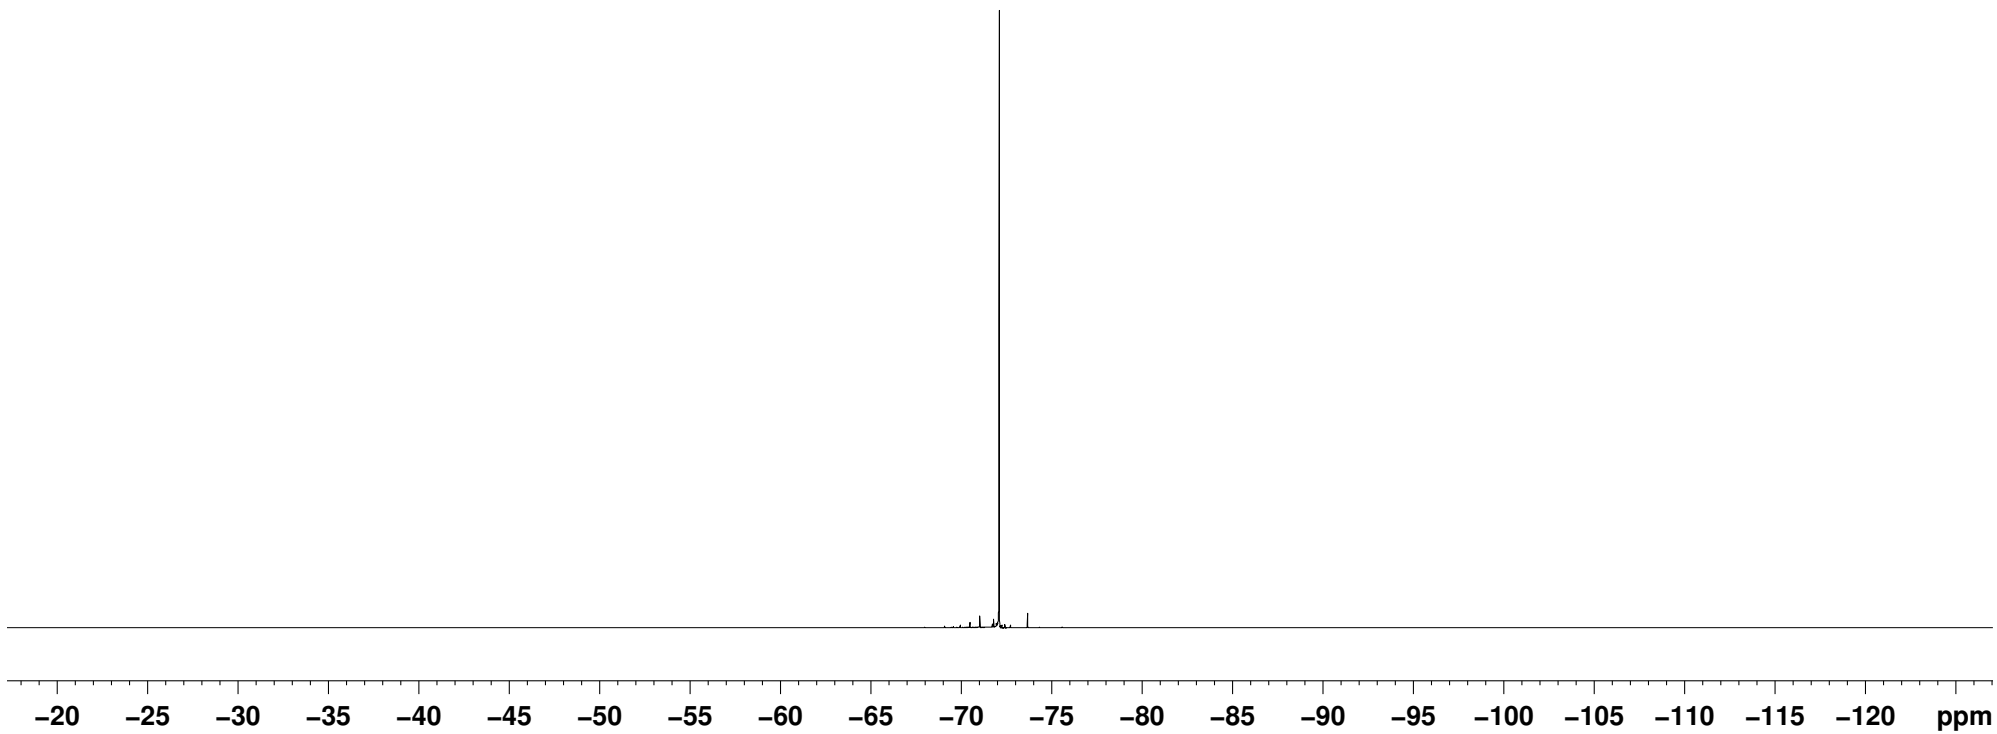



7.411  
7.363  
7.354  
7.341  
7.329  
7.314  
7.306  
7.301  
7.296  
7.291  
7.282  
7.268  
7.207  
7.202  
7.182  
7.160  
7.155  
7.138  
7.134  
7.124  
7.112  
7.109  
7.067  
7.042  
7.017  
6.824  
6.801  
6.798  
6.775  
6.773  
6.506  
6.480  
5.918  
5.885  
5.602  
5.577  
5.552  
5.545  
5.520  
5.495  
5.487  
5.463

3.526  
3.493

2.268

0.000

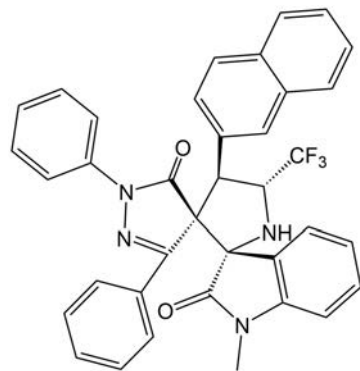

**3ma**  
<sup>1</sup>H NMR (300 MHz, CDCl<sub>3</sub>)

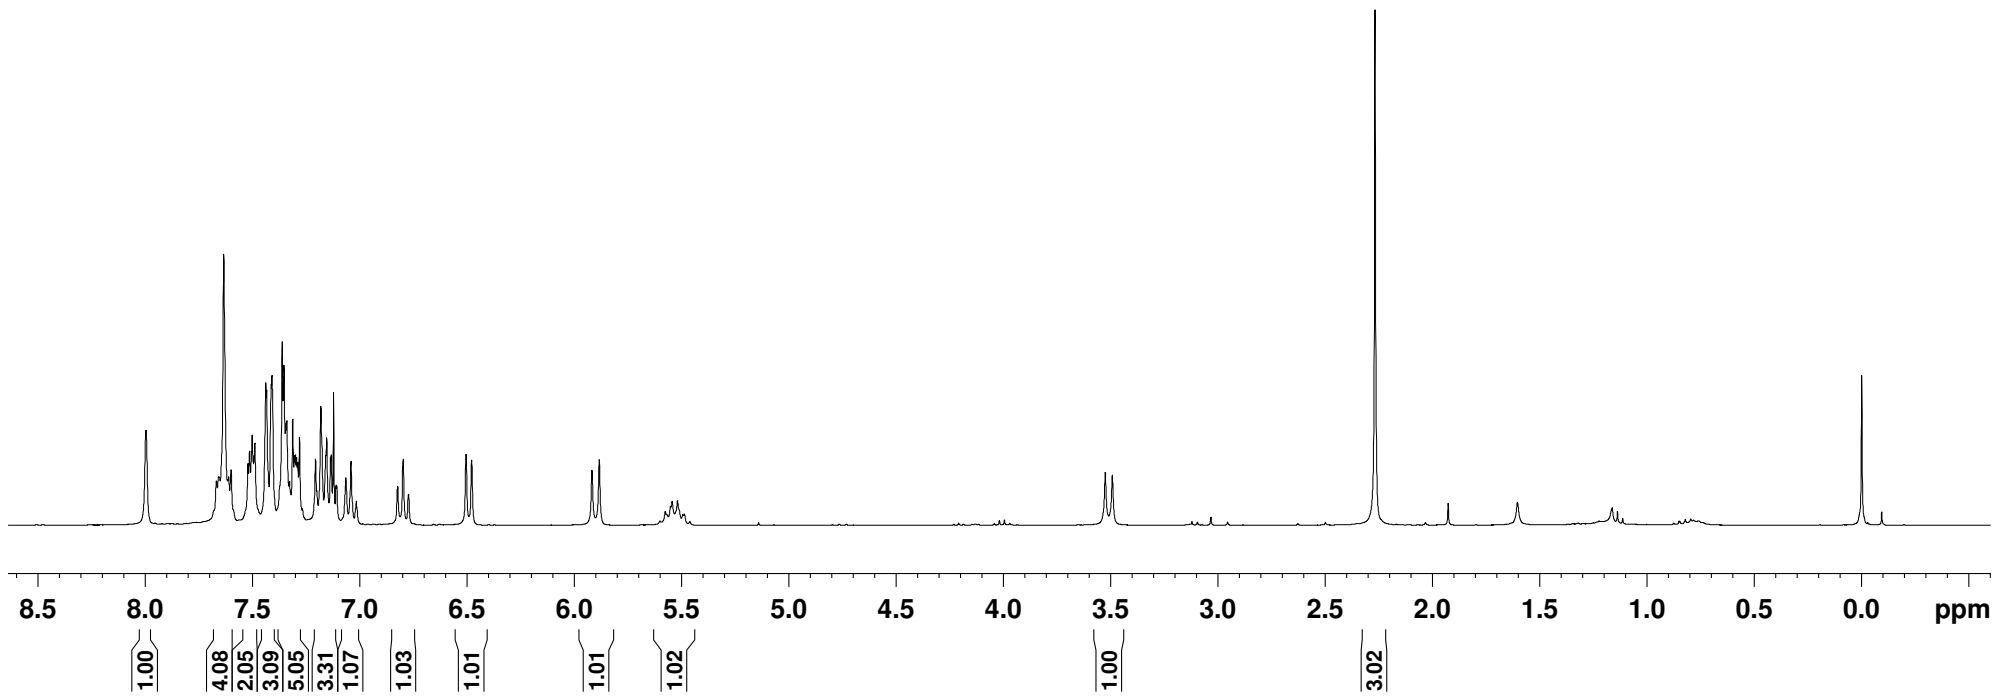

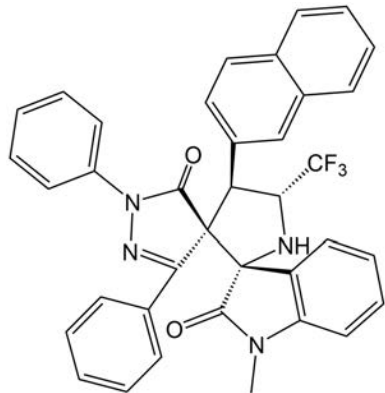

**3ma**

<sup>13</sup>C NMR (75 MHz, CDCl<sub>3</sub>)

172.84  
169.71  
153.90  
142.71  
135.51  
132.16  
131.98  
130.61  
130.01  
129.89  
129.35  
129.31  
127.74  
127.66  
127.26  
127.04  
127.00  
126.90  
126.44  
125.37  
125.28  
125.16  
124.71  
123.34  
123.18  
121.84  
119.47  
119.02  
107.08

76.45  
76.02  
75.60  
71.82  
69.51  
61.42  
61.02  
60.61  
60.20  
47.04  
23.97  
-0.00

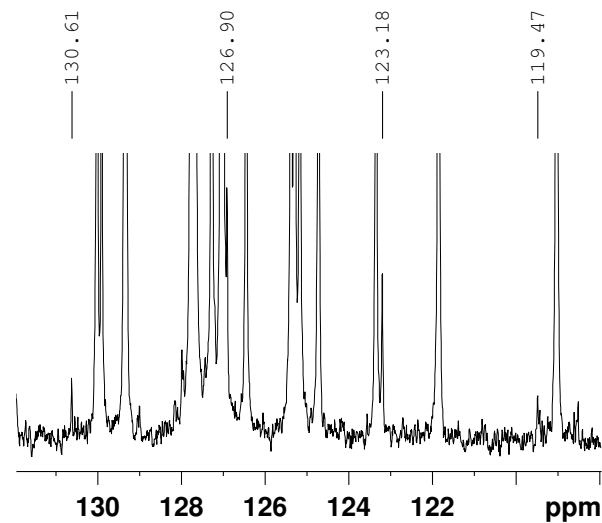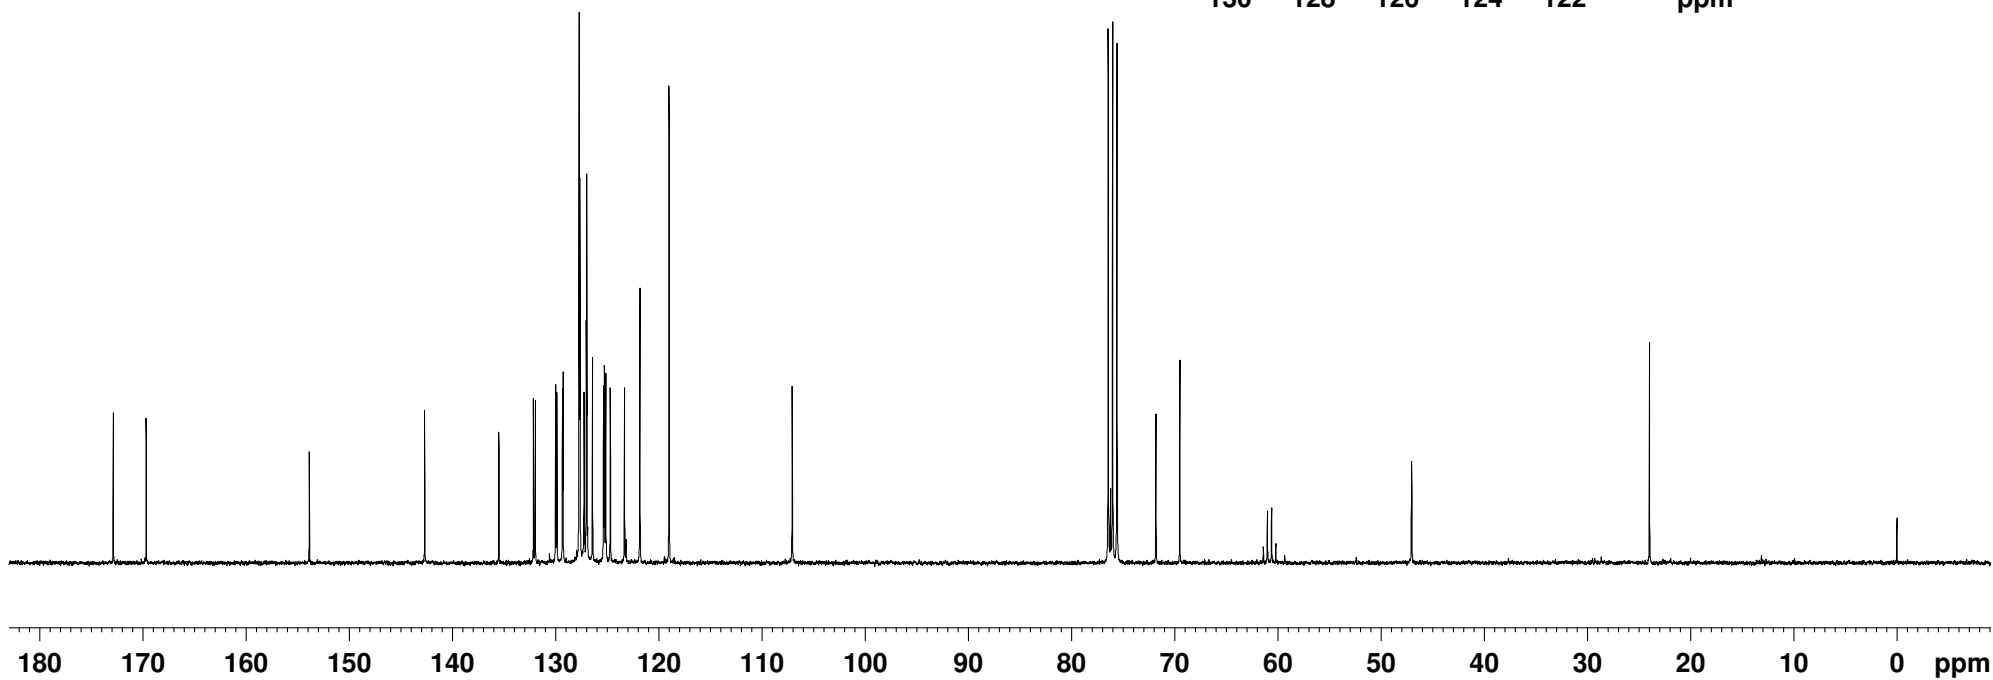

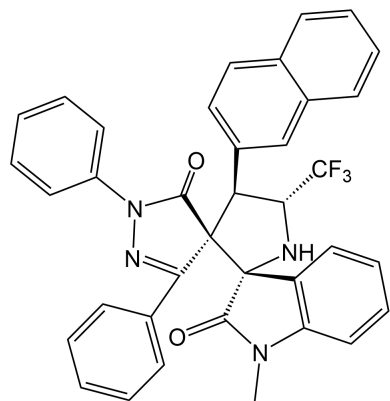

**3ma**

$^{19}\text{F}$  NMR (282 MHz,  $\text{CDCl}_3$ )

— -72.079

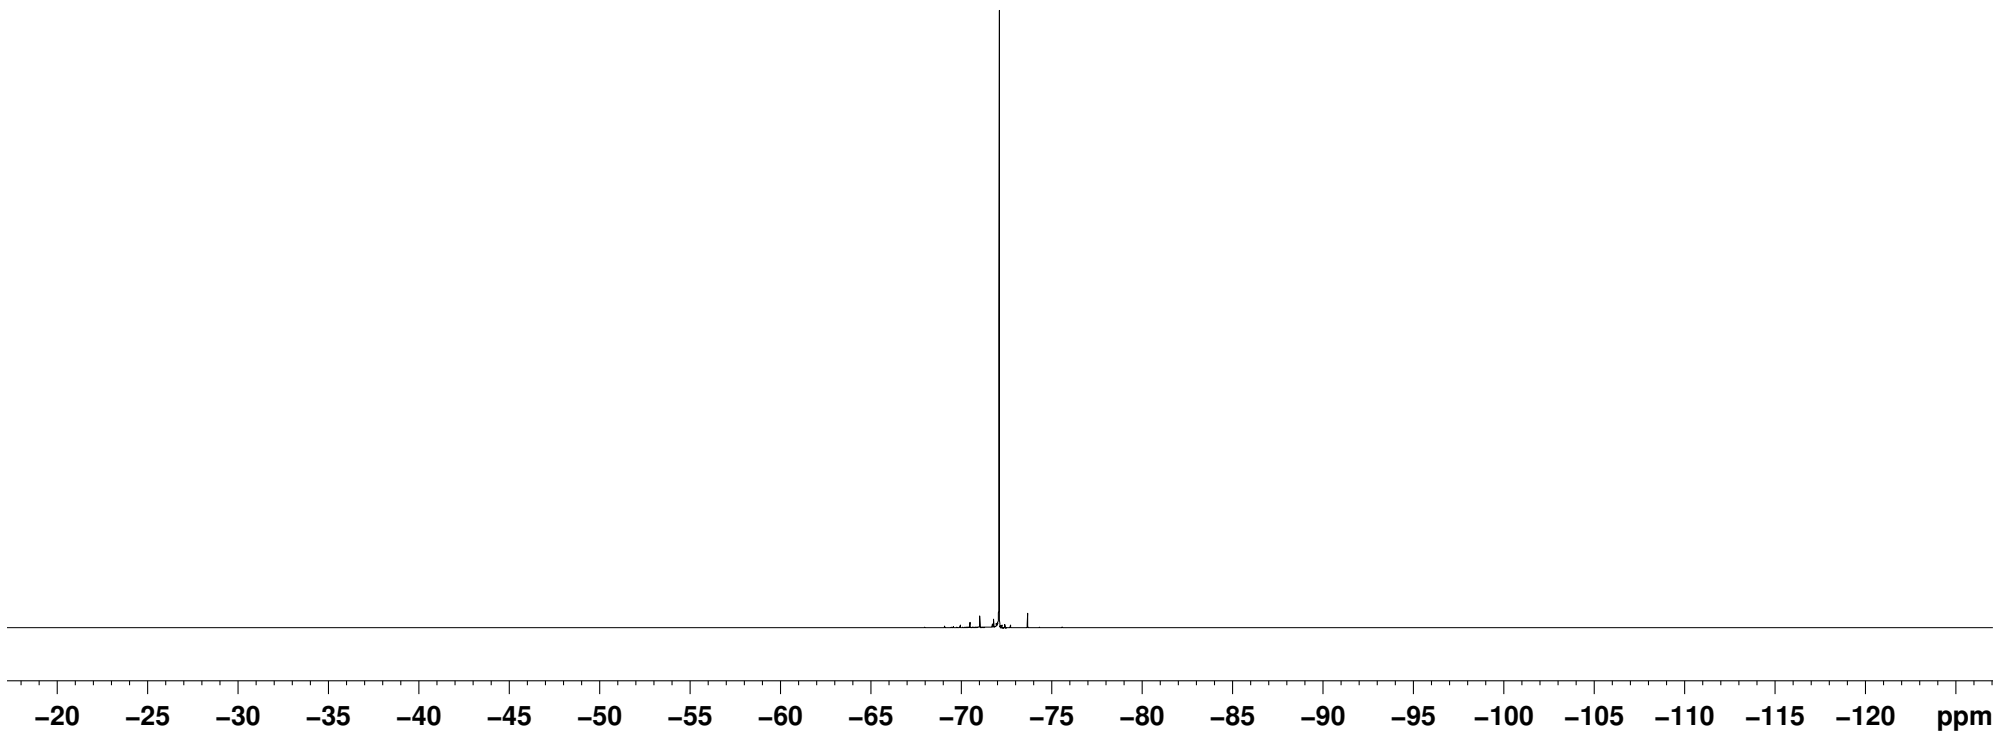

7.479  
7.468  
7.464  
7.443  
7.433  
7.414  
7.303  
7.294  
7.287  
7.282  
7.278  
7.264  
7.256  
7.252  
7.241  
7.231  
7.226  
7.217  
7.191  
6.923  
6.921  
6.898  
6.896  
6.872  
6.870  
6.618  
6.593  
5.813  
5.779  
5.527  
5.501  
5.476  
5.450

3.538  
3.510

2.352

-0.000

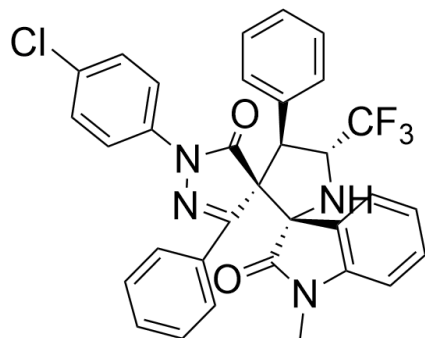

3na

<sup>1</sup>H NMR (300 MHz, CDCl<sub>3</sub>)

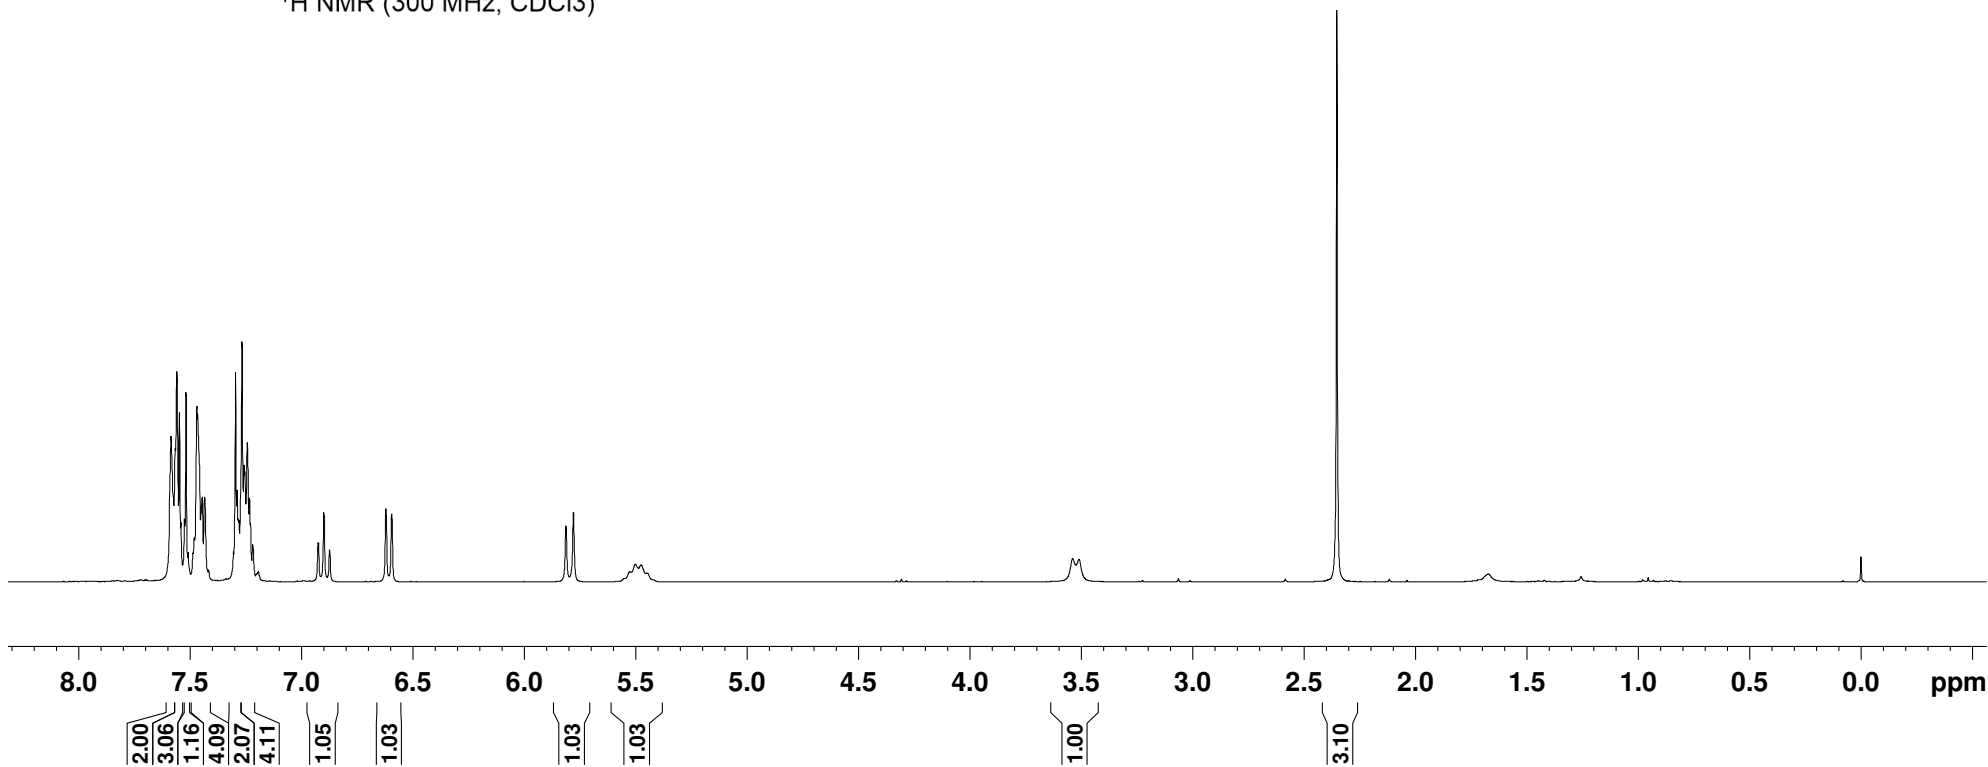

— 173.83  
— 170.61

— 155.27

143.79  
135.19  
132.72  
131.37  
131.13  
130.79  
130.54  
130.20  
128.95  
128.76  
128.59  
128.42  
128.11  
127.41  
124.63  
124.26  
122.92  
122.88  
121.84  
120.92  
108.21

77.40  
77.09  
76.77  
73.04  
70.53

62.02  
61.72  
61.41  
61.10

— 47.99

— 25.03

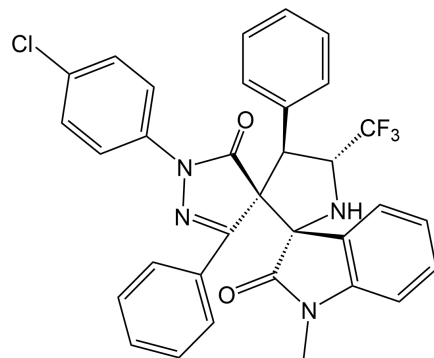

<sup>13</sup>C NMR (100 MHz, CDCl<sub>3</sub>)

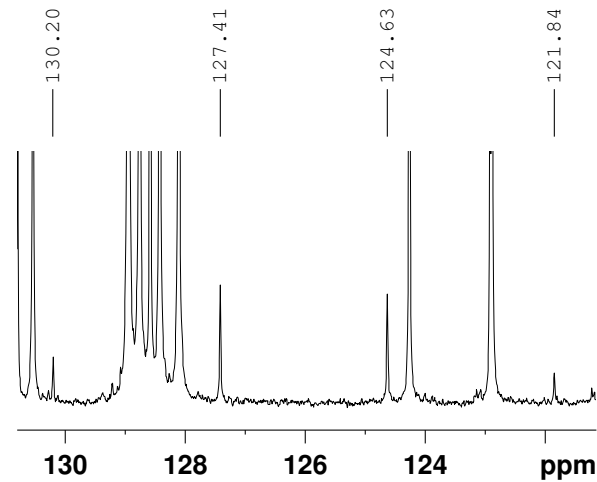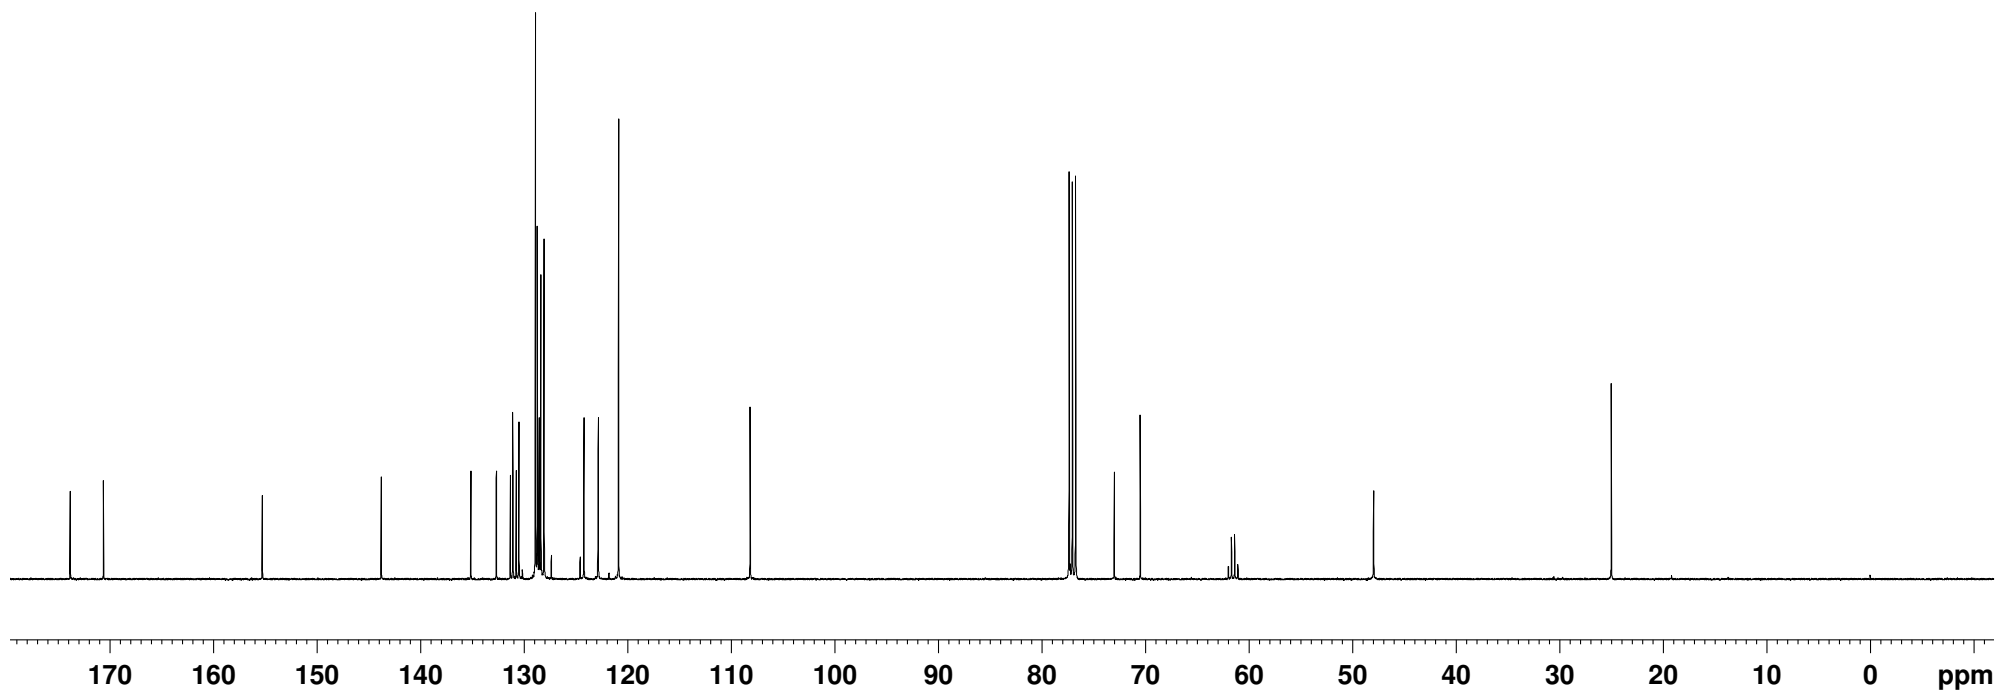

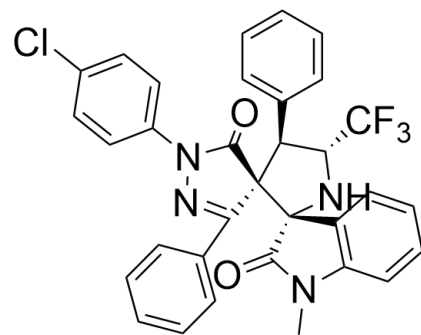

3na

<sup>19</sup>F NMR (282 MHz, CDCl<sub>3</sub>)

— -72.085

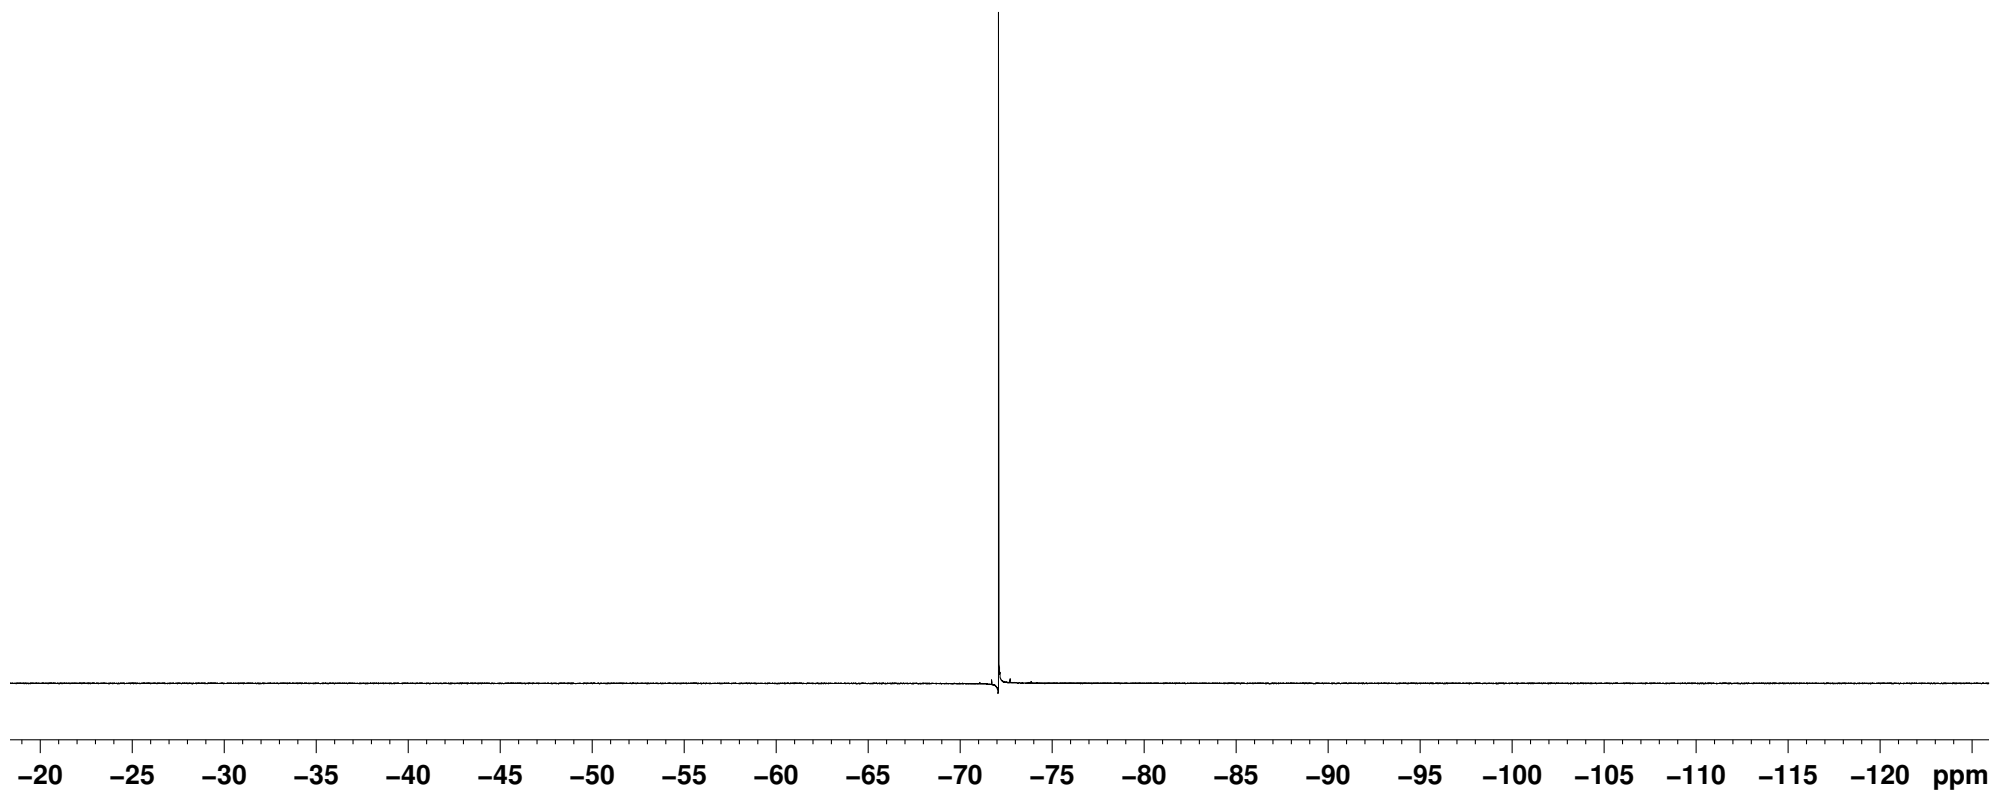

7.408  
7.290  
7.281  
7.275  
7.271  
7.261  
7.249  
7.246  
7.236  
7.226  
7.220  
7.211  
7.195  
7.190  
7.186  
6.915  
6.913  
6.890  
6.888  
6.864  
6.862  
6.613  
6.588  
5.813  
5.779  
5.604  
5.554  
5.530  
5.522  
5.505  
5.497  
5.473  
5.448  
5.440  
5.415

3.534  
3.502

2.350

-0.000

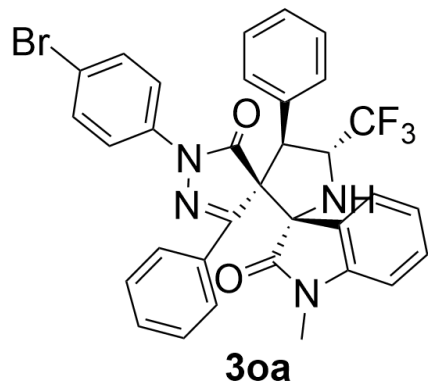

$^1\text{H NMR}$  (300 MHz,  $\text{CDCl}_3$ )

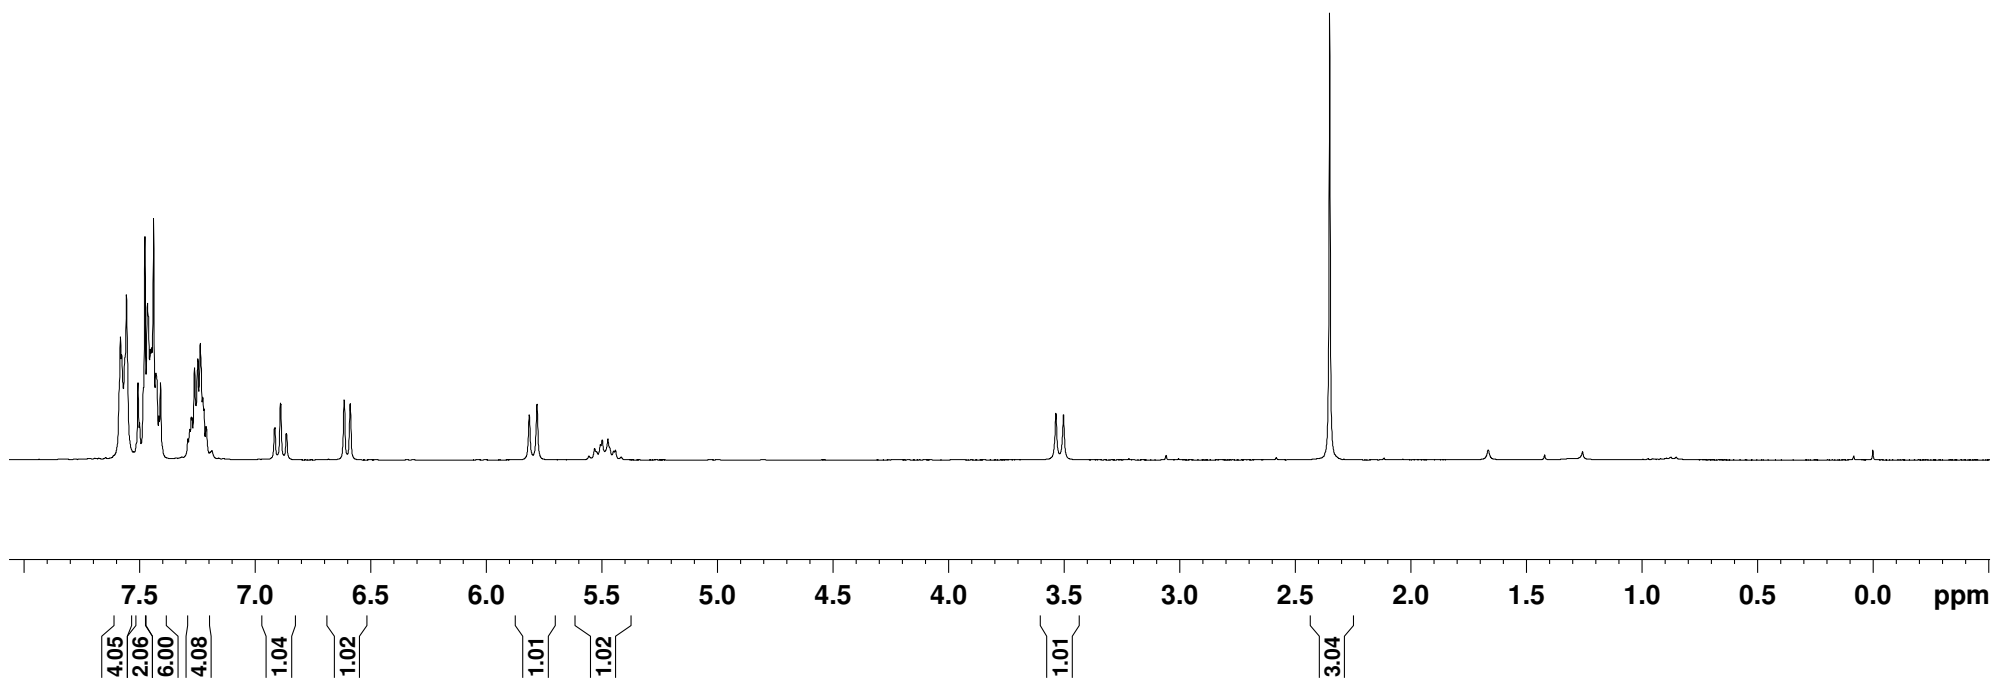

— 173.80  
 — 170.60  
 — 155.29  
 143.76  
 135.68  
 132.69  
 131.88  
 131.58  
 131.12  
 130.76  
 130.54  
 128.95  
 128.75  
 128.58  
 128.41  
 128.10  
 127.87  
 124.23  
 124.16  
 122.88  
 121.12  
 120.45  
 119.16  
 108.21

77.51  
 77.09  
 76.67  
 73.05  
 70.52  
 62.16  
 61.75  
 61.35  
 60.94  
 47.98  
 25.02

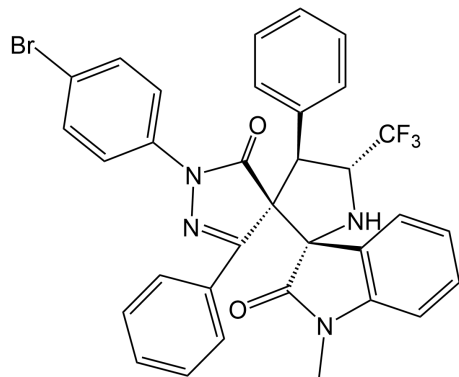

**30a**

<sup>13</sup>C NMR (100 MHz, CDCl<sub>3</sub>)

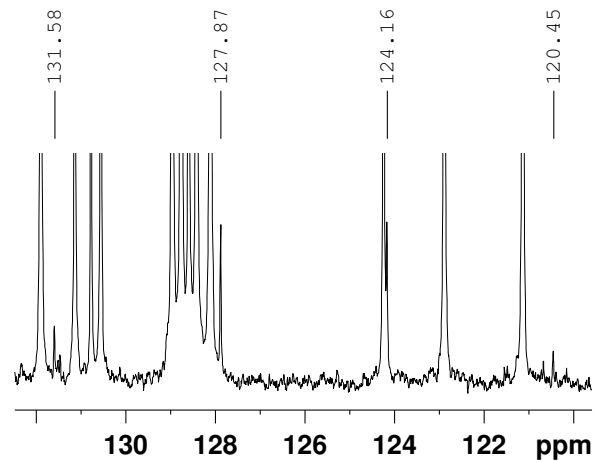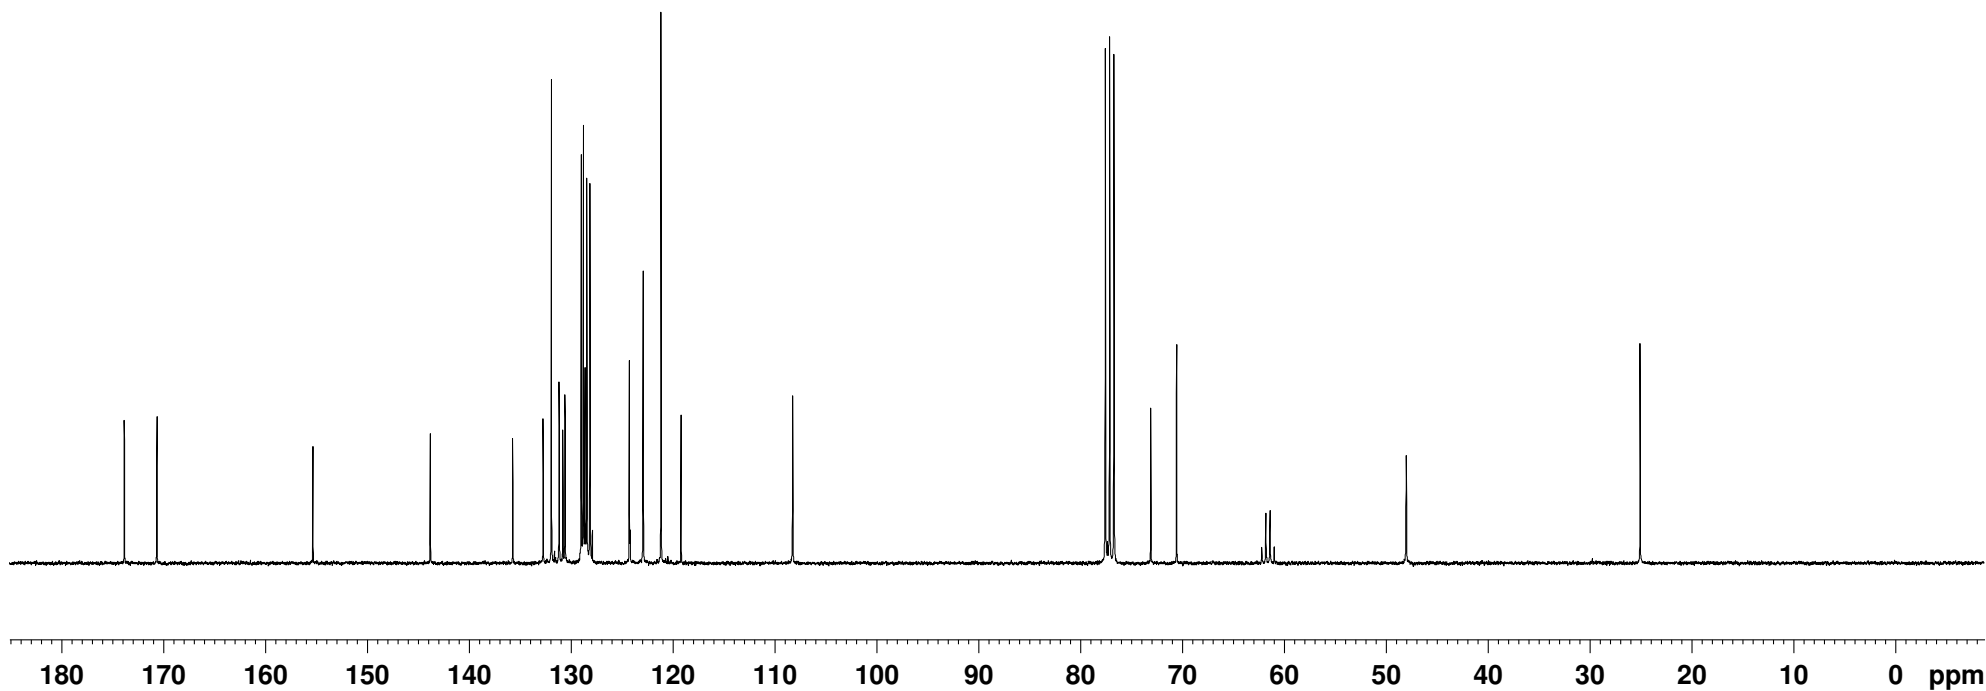



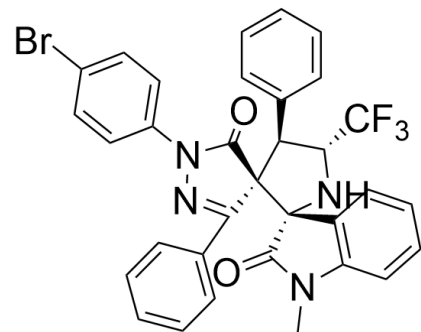

**30a**

<sup>19</sup>F NMR (282 MHz, CDCl<sub>3</sub>)

-72.08

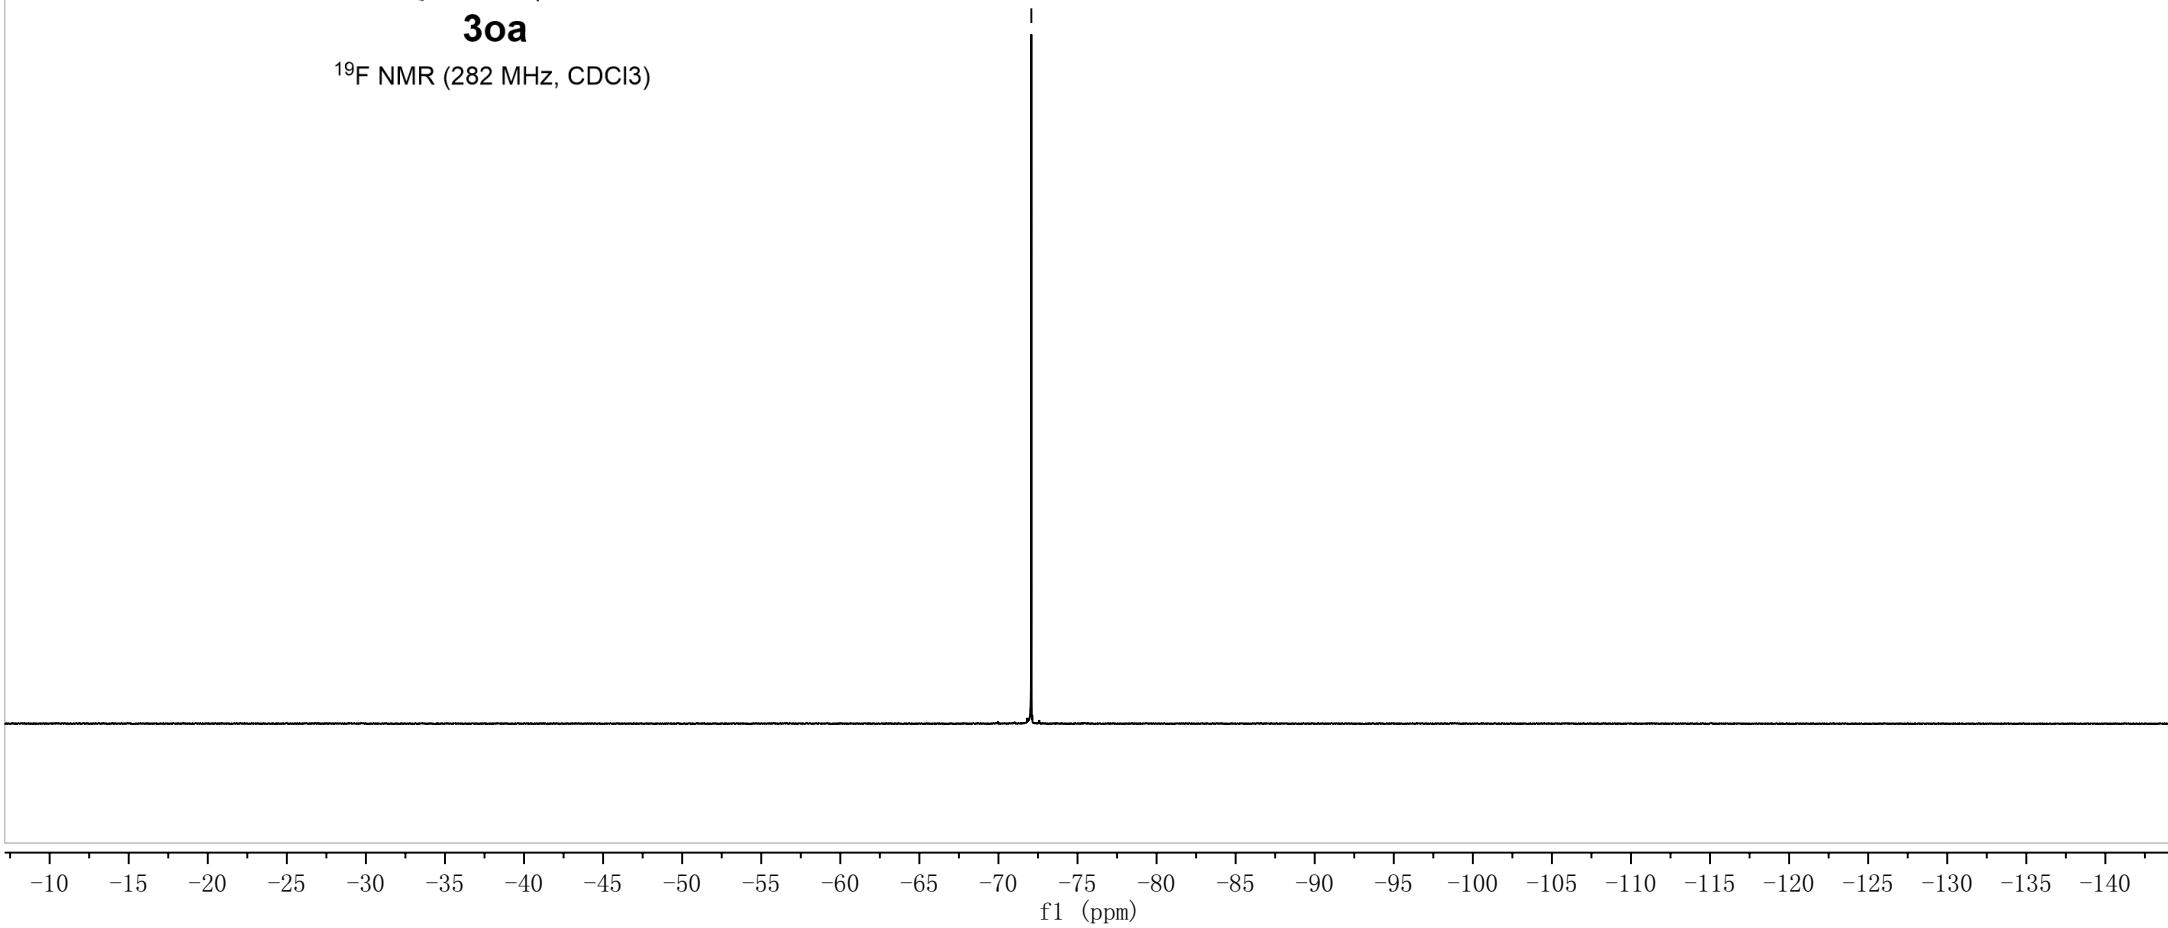

7.215  
7.211  
7.208  
7.192  
7.181  
7.129  
7.101  
7.053  
7.014  
6.991  
6.960  
6.931  
6.907  
6.881  
6.840  
6.814  
6.790  
6.762  
6.710  
6.691  
6.666  
6.599  
6.573  
6.506  
6.481  
6.455  
5.813  
5.779  
5.678  
5.619  
5.571  
5.547  
5.521  
5.514  
5.489  
5.464  
5.457  
5.432  
5.373

3.553  
3.521

2.343  
2.296

-0.000

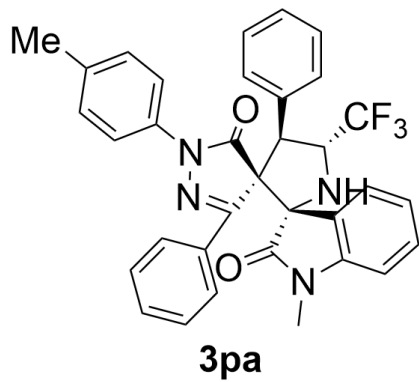

<sup>1</sup>H NMR (300 MHz, CDCl<sub>3</sub>)

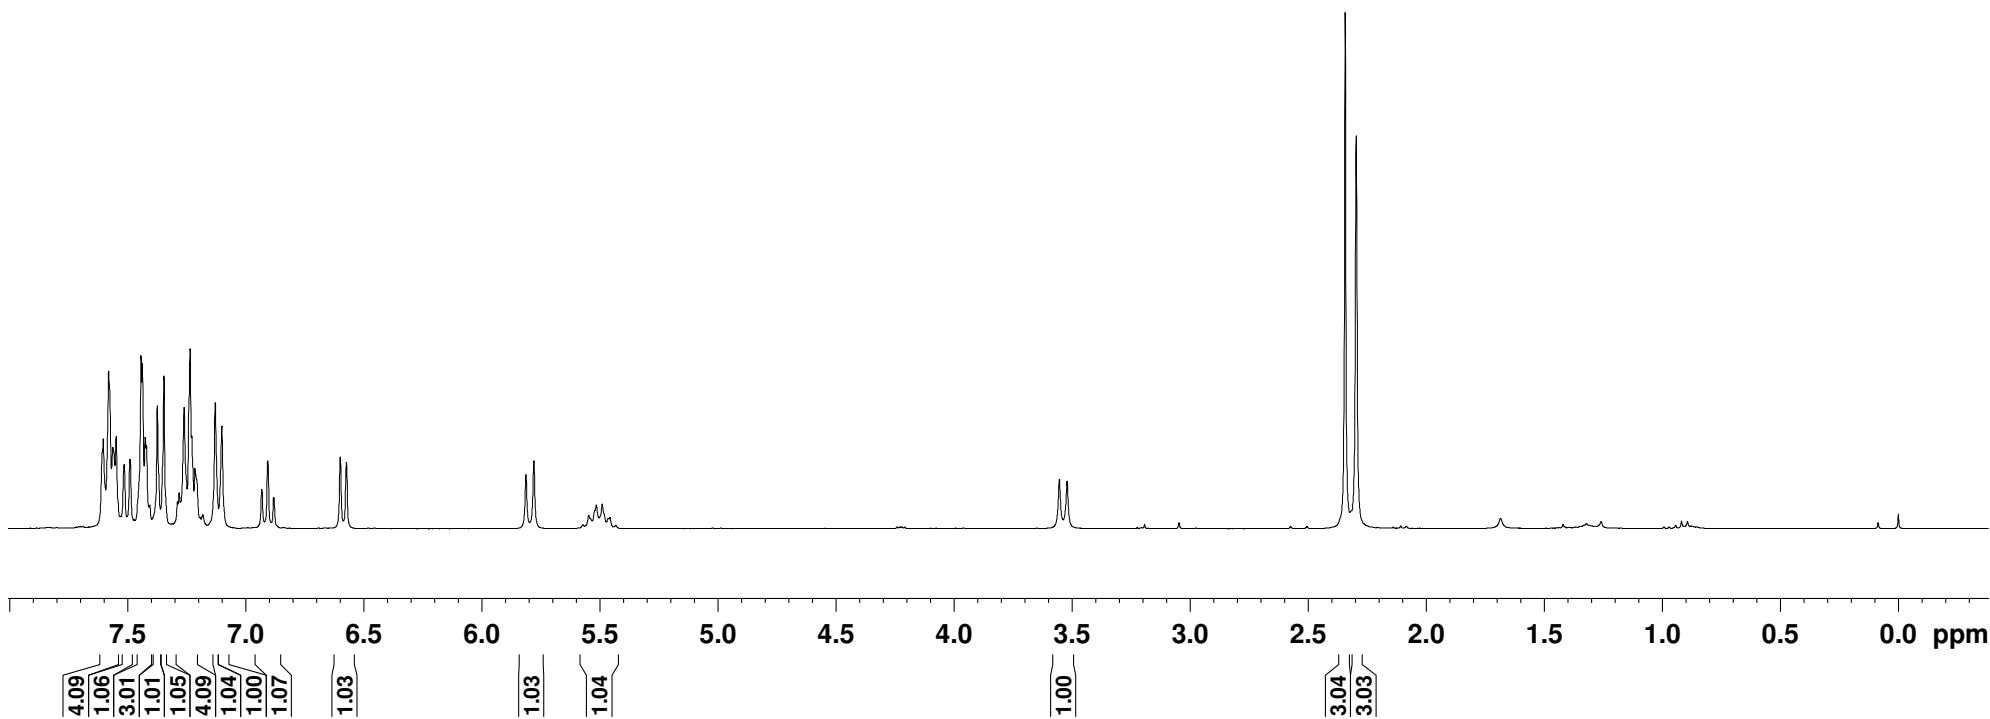

173.95  
170.58  
154.75  
143.80  
136.20  
134.16  
132.92  
131.07  
131.00  
130.30  
129.39  
128.90  
128.76  
128.52  
128.48  
128.04  
127.50  
124.71  
124.47  
123.08  
122.87  
121.93  
120.36  
108.09

77.40  
77.09  
76.77  
72.77  
70.46  
62.07  
61.76  
61.46  
61.15  
47.95  
25.00  
21.01

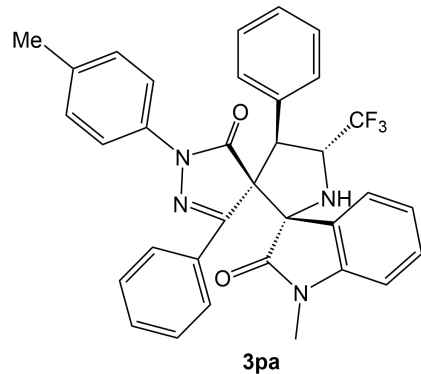

<sup>13</sup>C NMR (100 MHz, CDCl<sub>3</sub>)

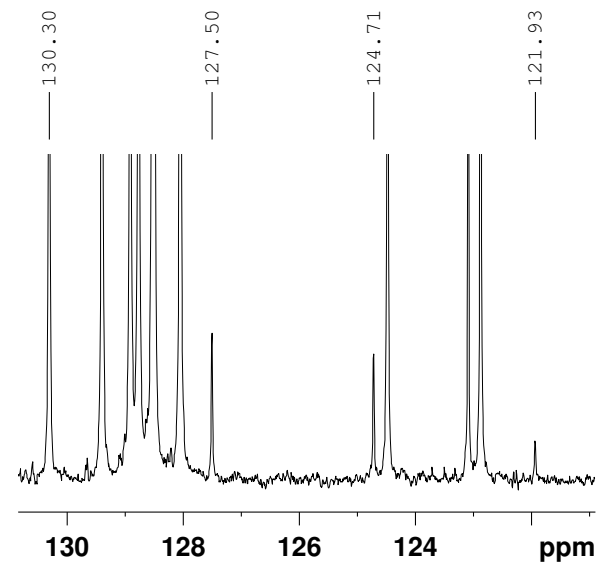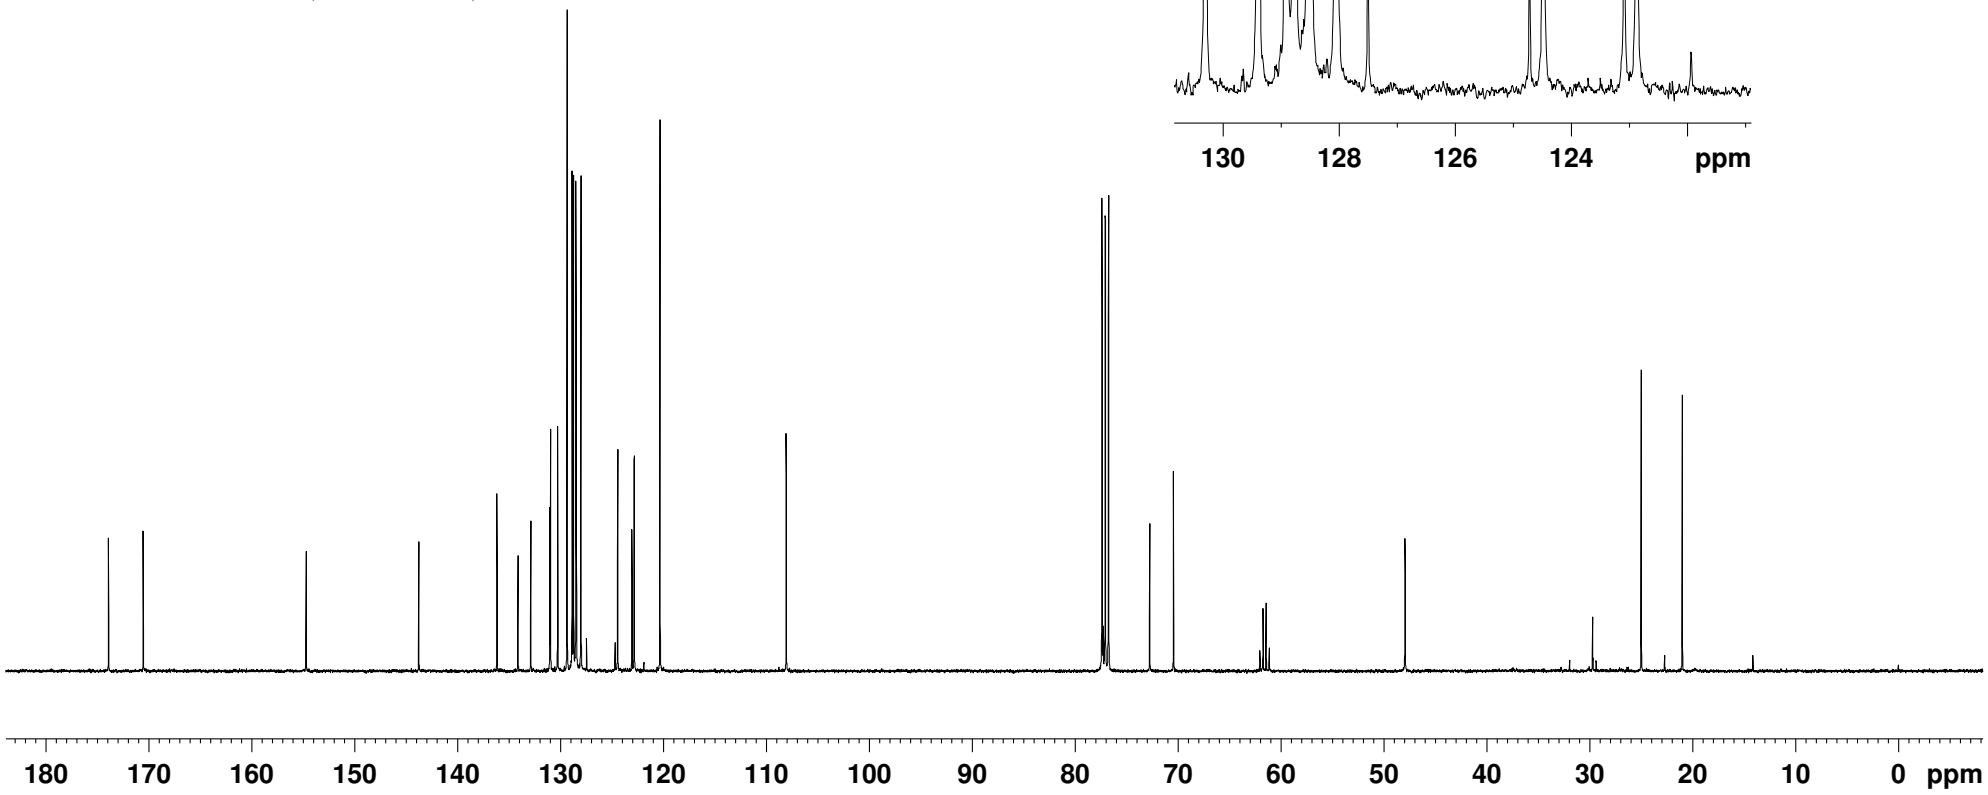

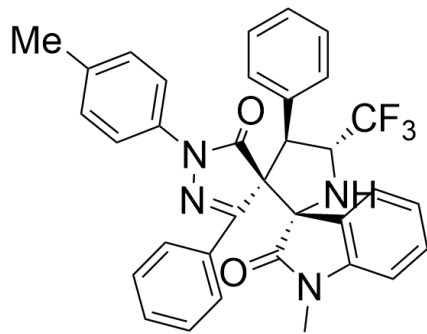

**3pa**

<sup>19</sup>F NMR (282 MHz, CDCl<sub>3</sub>)

— -72.023

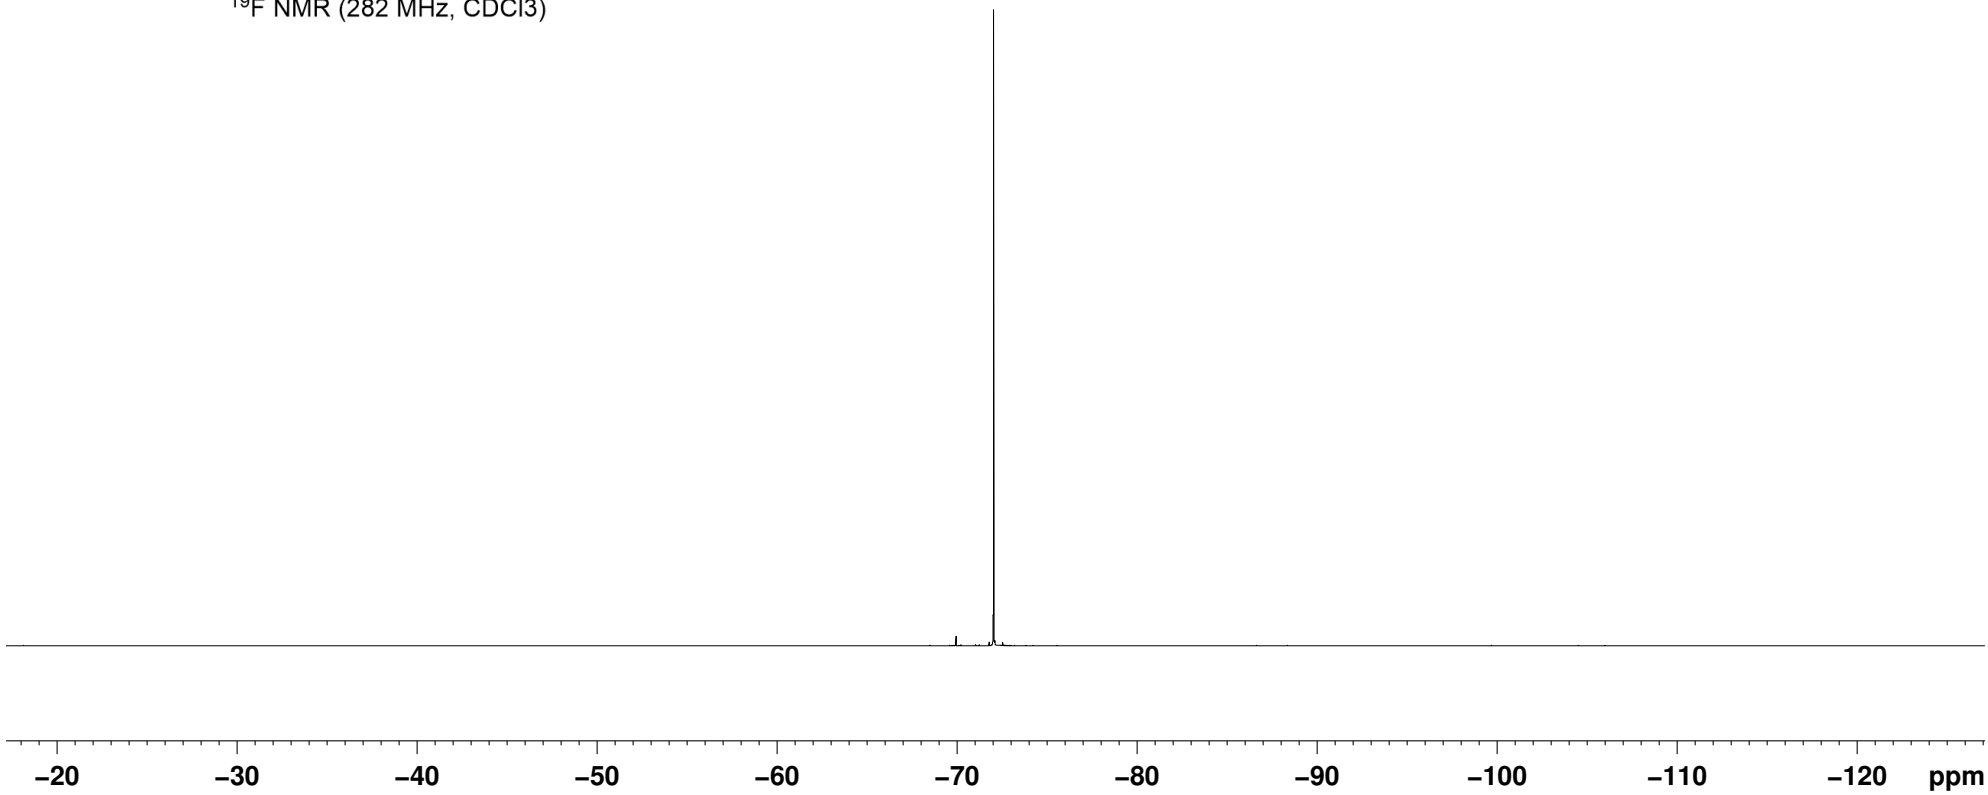

7.443  
7.433  
7.292  
7.285  
7.279  
7.264  
7.239  
7.231  
7.217  
7.208  
7.186  
7.145  
7.142  
7.139  
7.118  
7.115  
7.112  
6.917  
6.892  
6.866  
6.609  
6.584  
5.830  
5.823  
5.796  
5.790  
5.557  
5.532  
5.507  
5.481  
5.475  
5.450  
5.424

3.540  
3.531  
3.508  
3.499

2.348

0.004  
-0.000

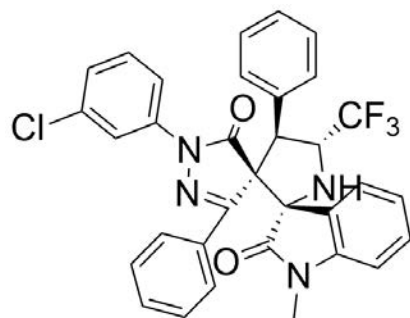

**3qa**

<sup>1</sup>H NMR (300 MHz, CDCl<sub>3</sub>)

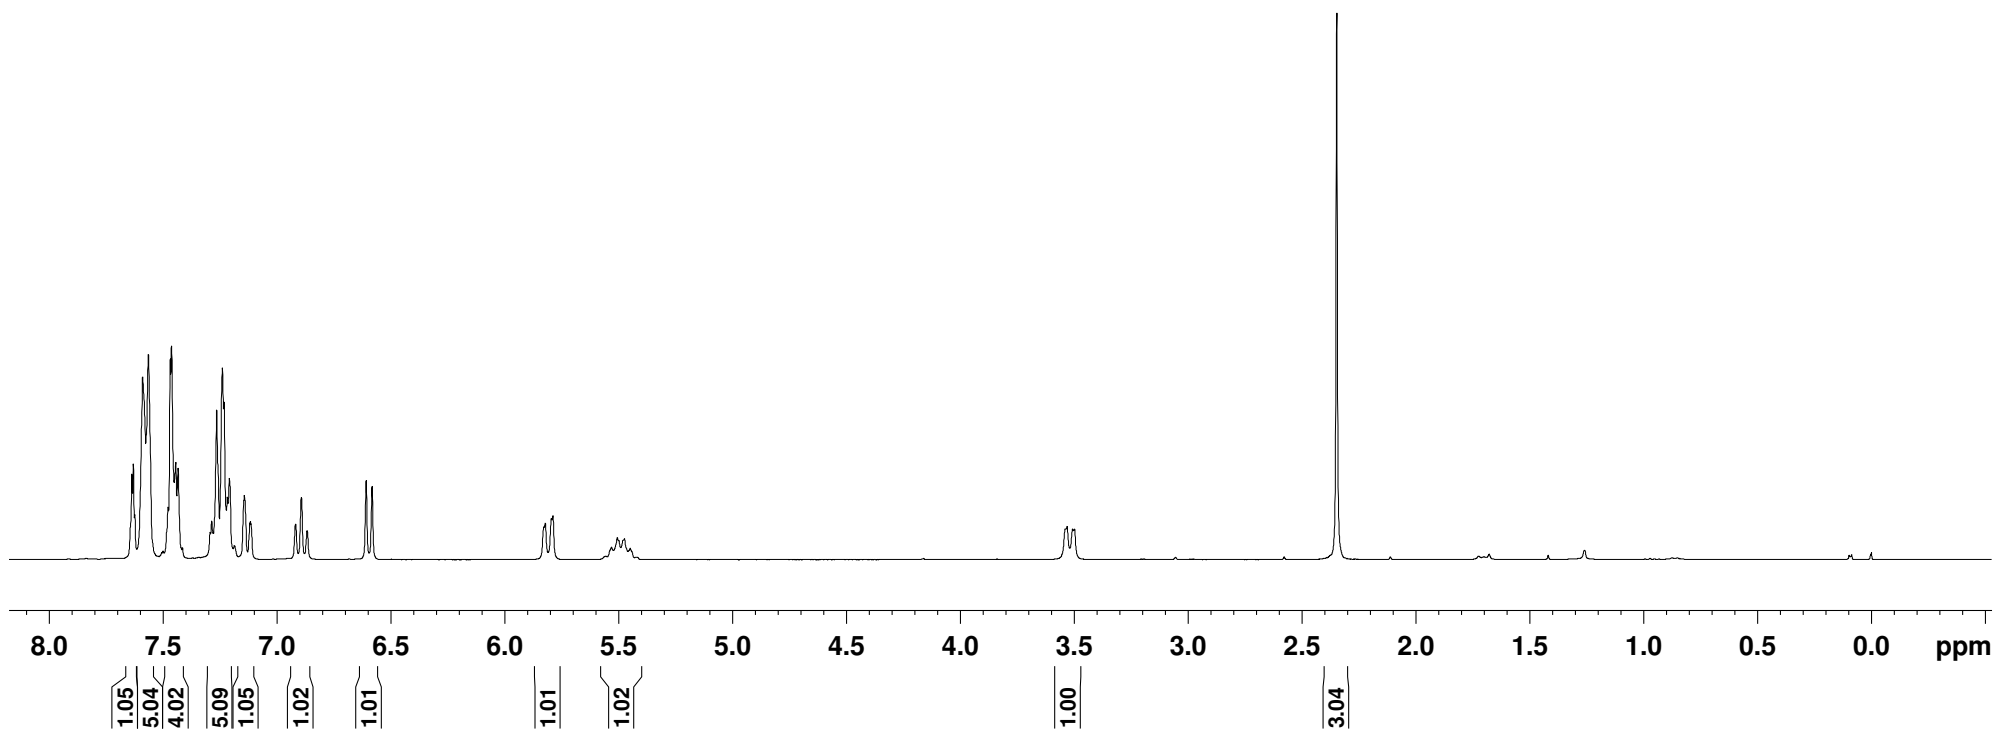

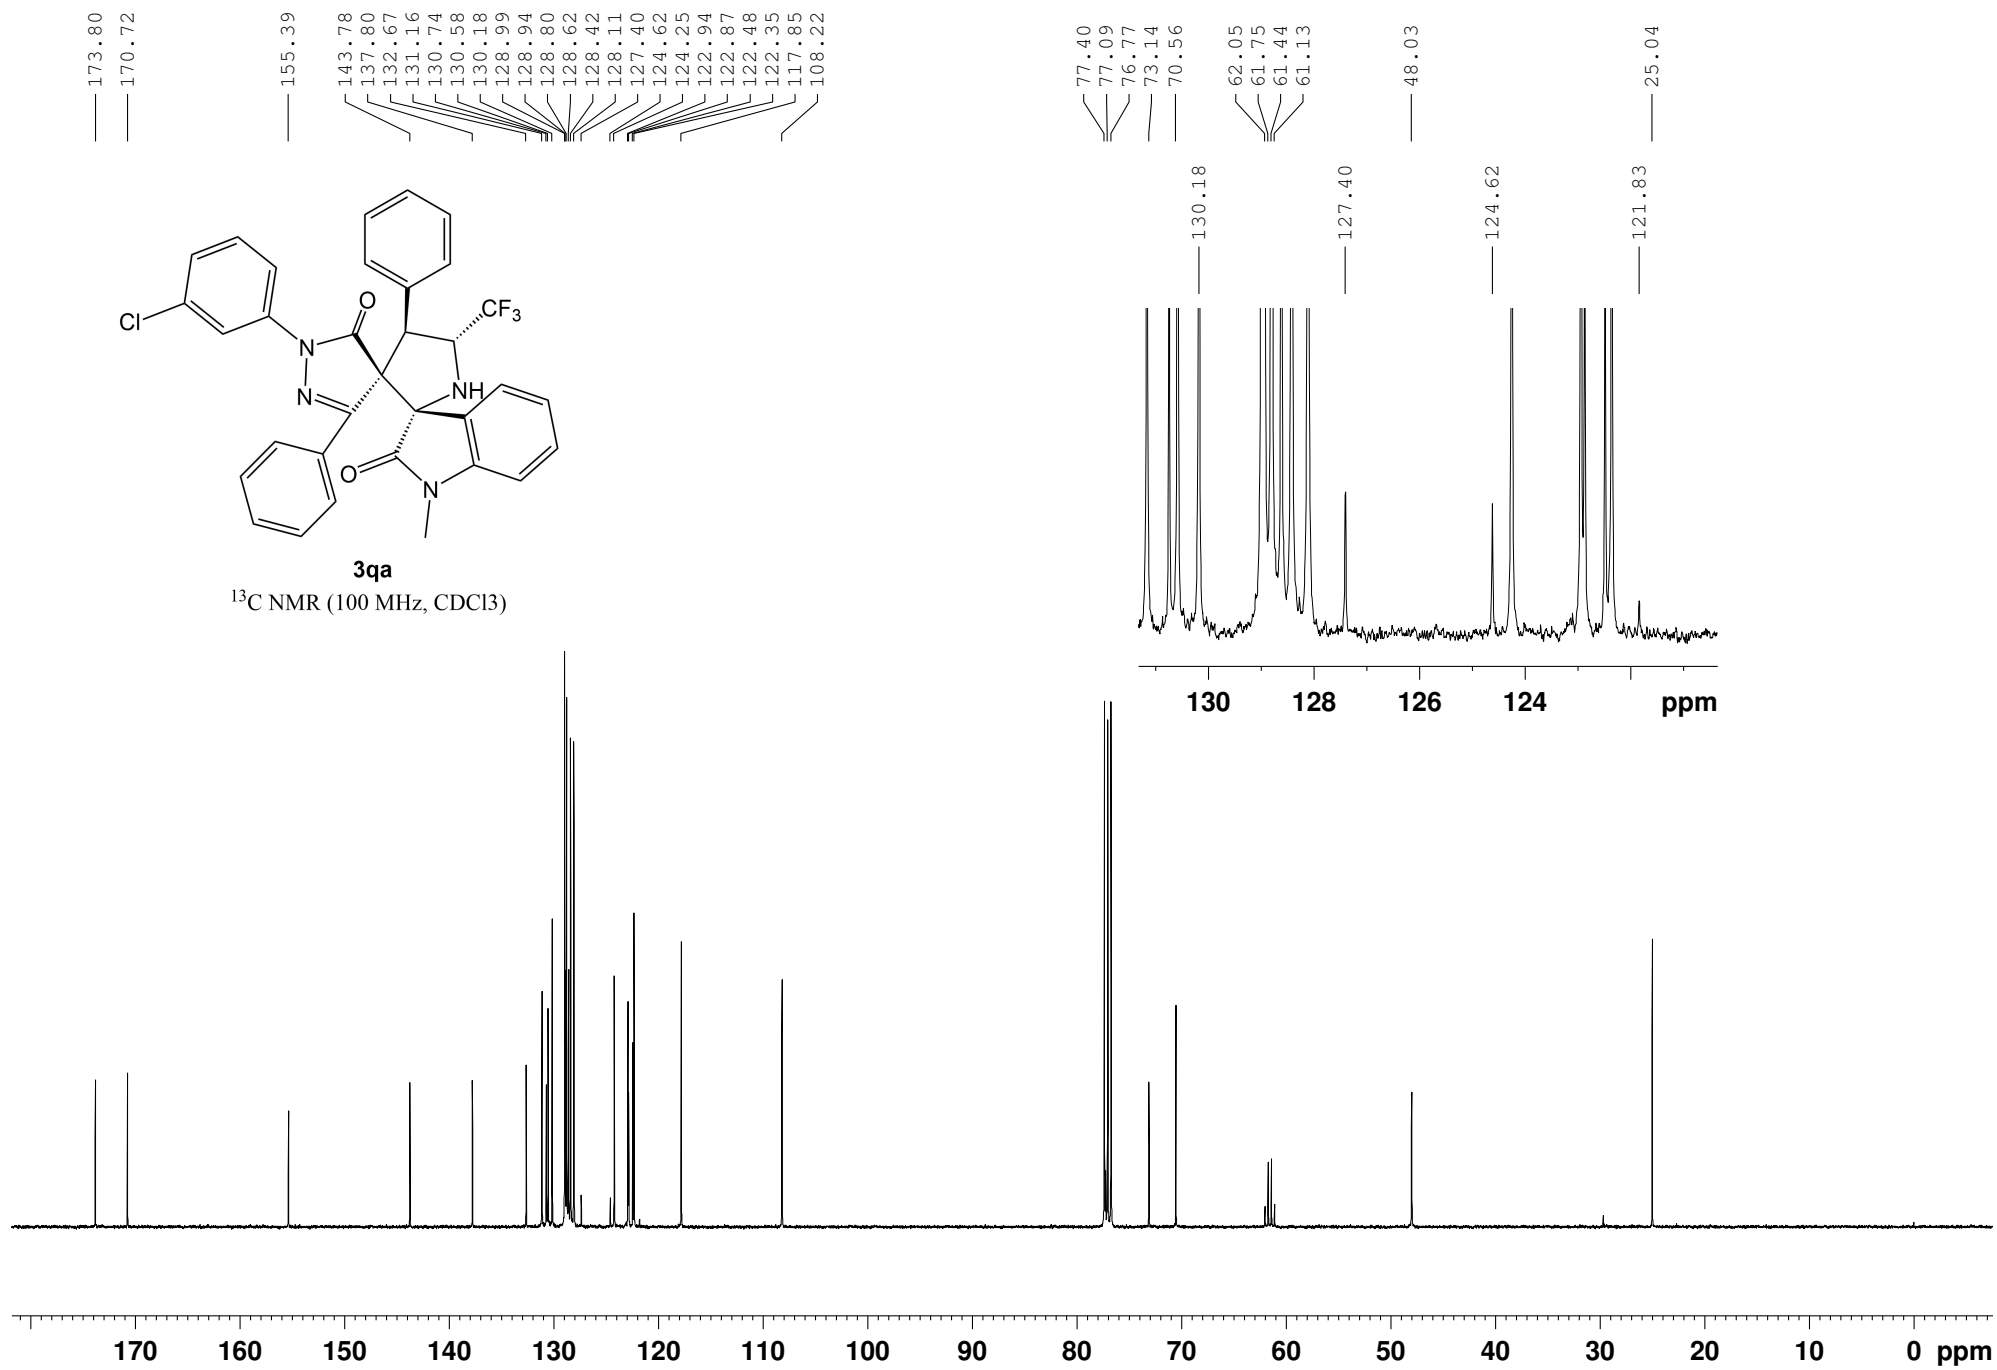

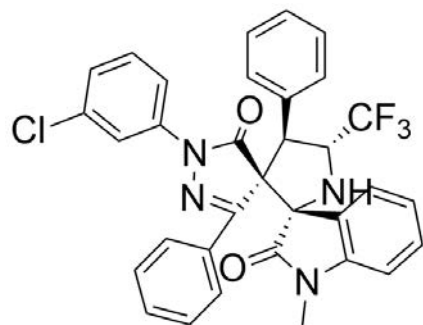

**3qa**

<sup>19</sup>F NMR (282 MHz, CDCl<sub>3</sub>)

— -72.037

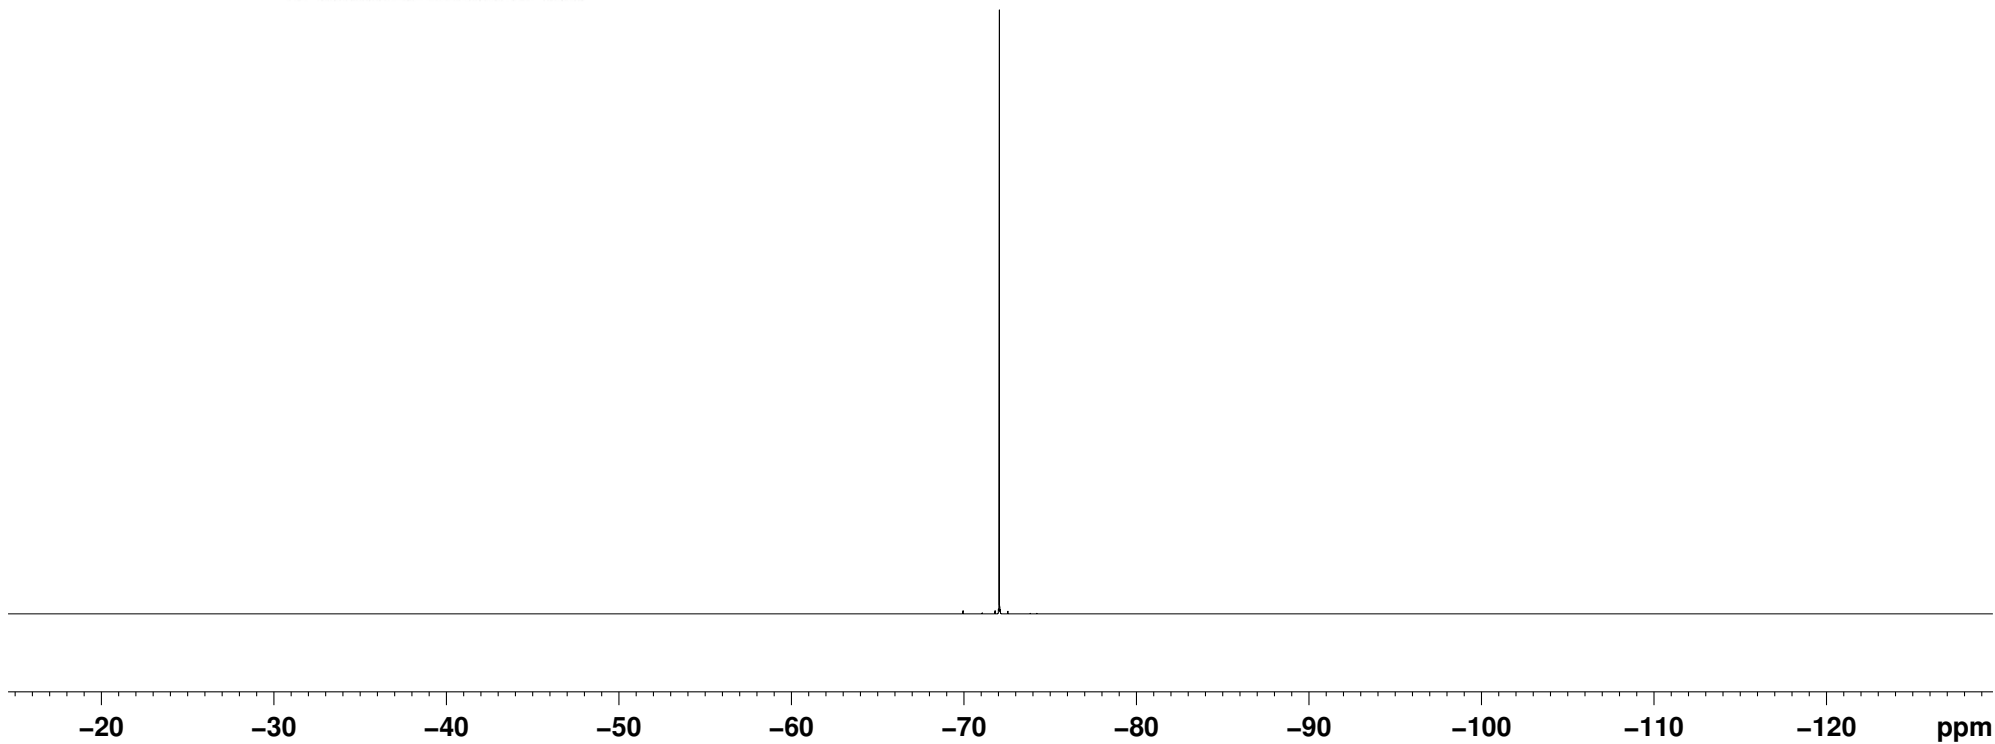

7.473  
7.464  
7.458  
7.440  
7.428  
7.290  
7.282  
7.261  
7.236  
7.227  
7.214  
7.210  
7.206  
7.191  
7.181  
7.164  
7.137  
6.912  
6.889  
6.887  
6.863  
6.605  
6.579  
6.026  
6.014  
5.930  
5.824  
5.790  
5.679  
5.646  
5.613  
5.598  
5.587  
5.556  
5.531  
5.506  
5.499  
5.474  
5.449  
5.442  
5.417  
5.356

3.534  
3.501

2.343

-0.000

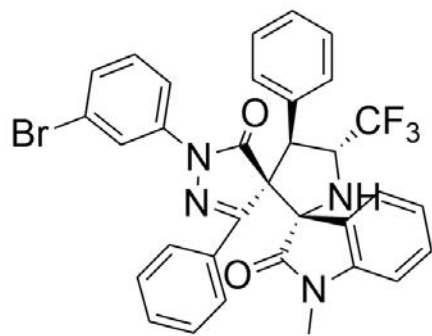

**3ra**

<sup>1</sup>H NMR (300 MHz, CDCl<sub>3</sub>)

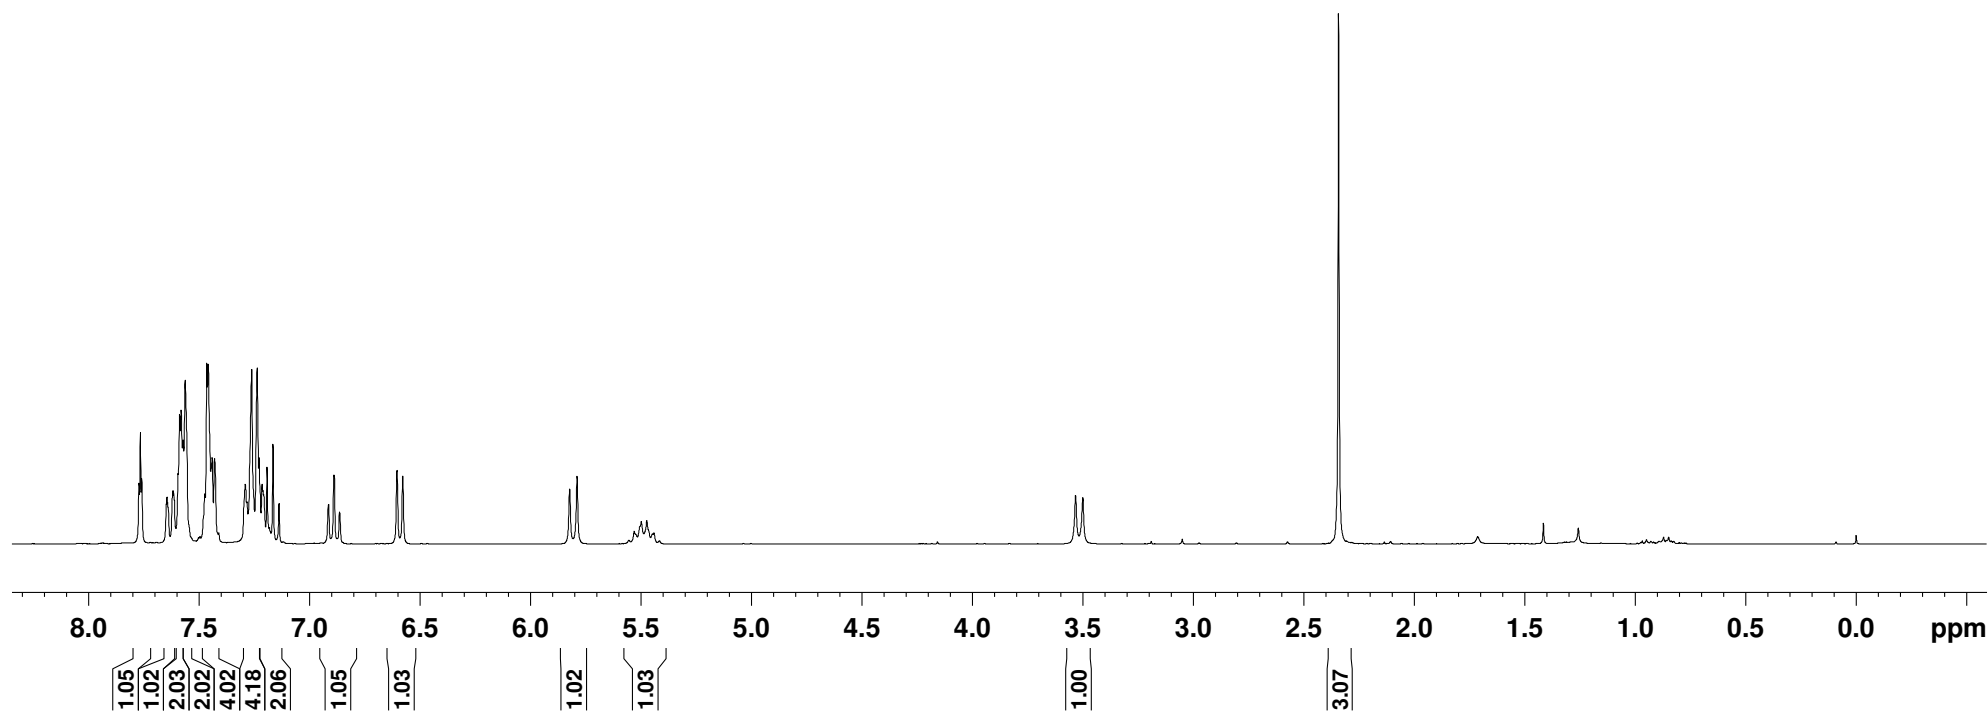



— 173.81  
 — 170.72  
  
 — 155.36  
 — 143.78  
 — 137.70  
 — 134.55  
 — 132.68  
 — 131.15  
 — 130.75  
 — 130.57  
 — 130.18  
 — 129.90  
 — 128.98  
 — 128.79  
 — 128.60  
 — 128.42  
 — 128.11  
 — 127.40  
 — 126.00  
 — 124.61  
 — 124.25  
 — 122.93  
 — 122.88  
 — 121.83  
 — 119.54  
 — 117.38  
 — 108.20

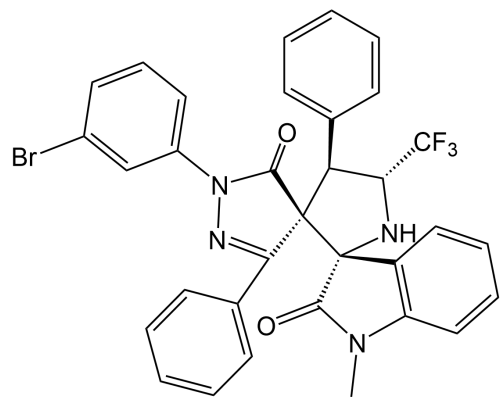

3ra

<sup>13</sup>C NMR (100 MHz, CDCl<sub>3</sub>)

— 77.38  
 — 77.07  
 — 76.75  
 — 73.15  
 — 70.56  
  
 — 62.06  
 — 61.75  
 — 61.44  
 — 61.14  
  
 — 48.03  
  
 — 25.03

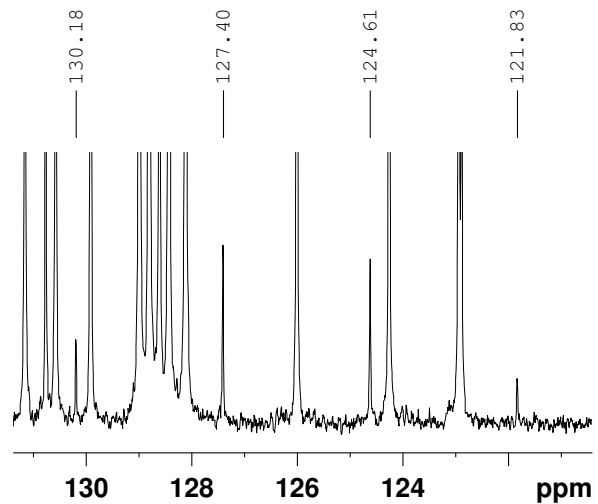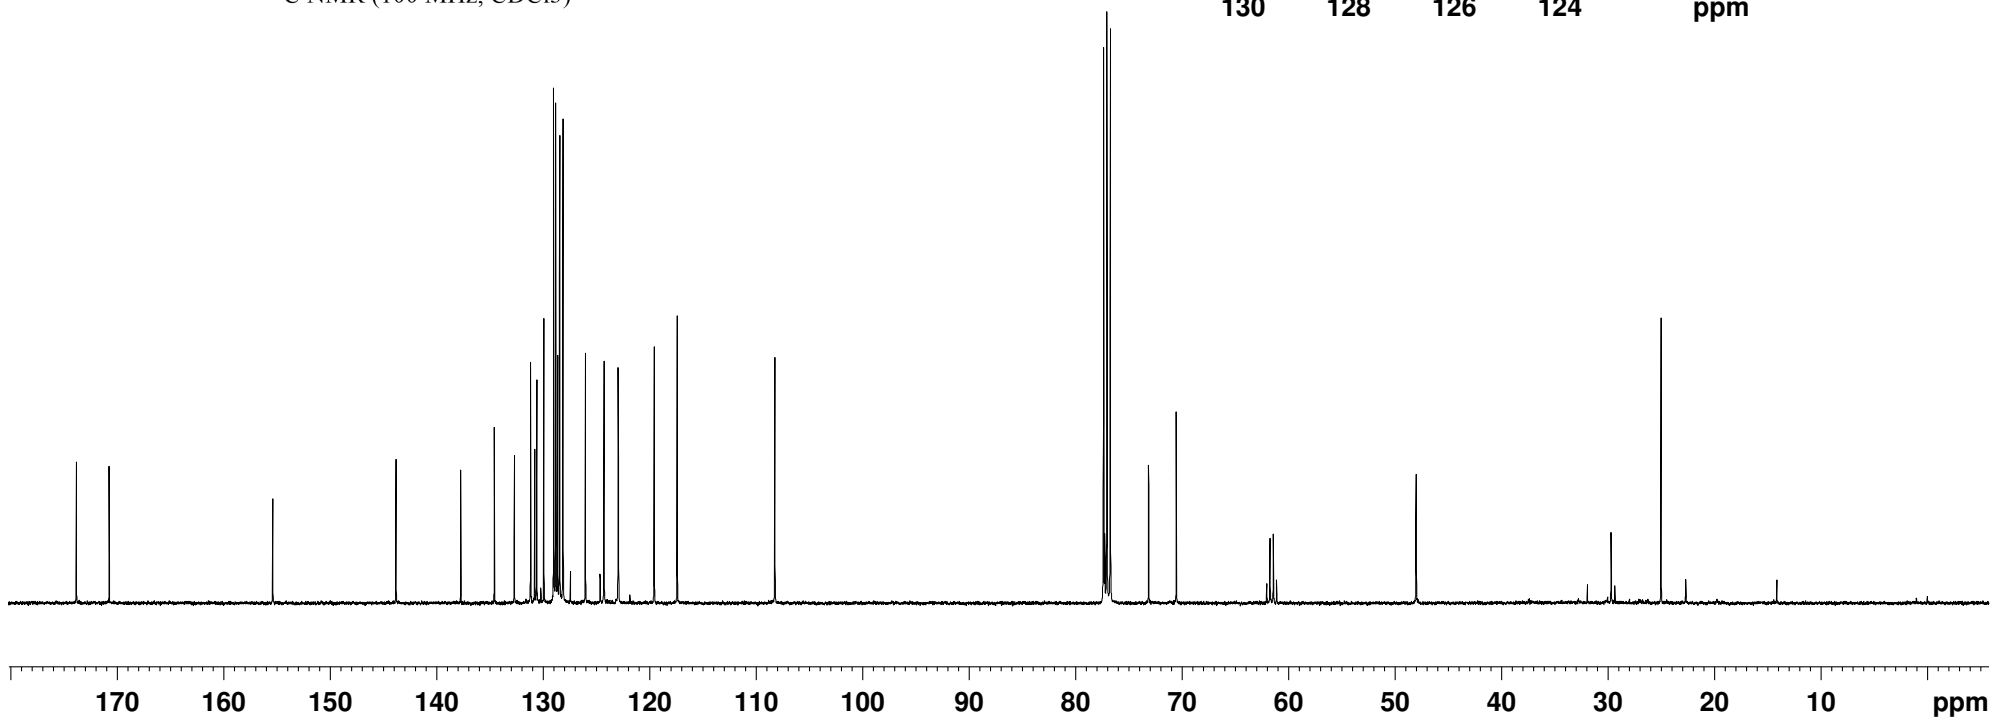

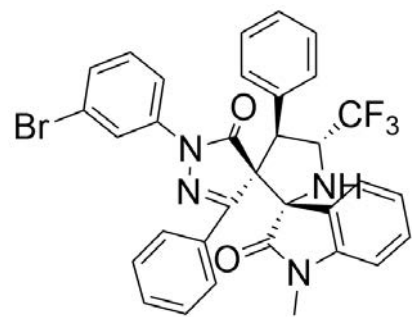

**3ra**

<sup>19</sup>F NMR (282 MHz, CDCl<sub>3</sub>)

— -72.037

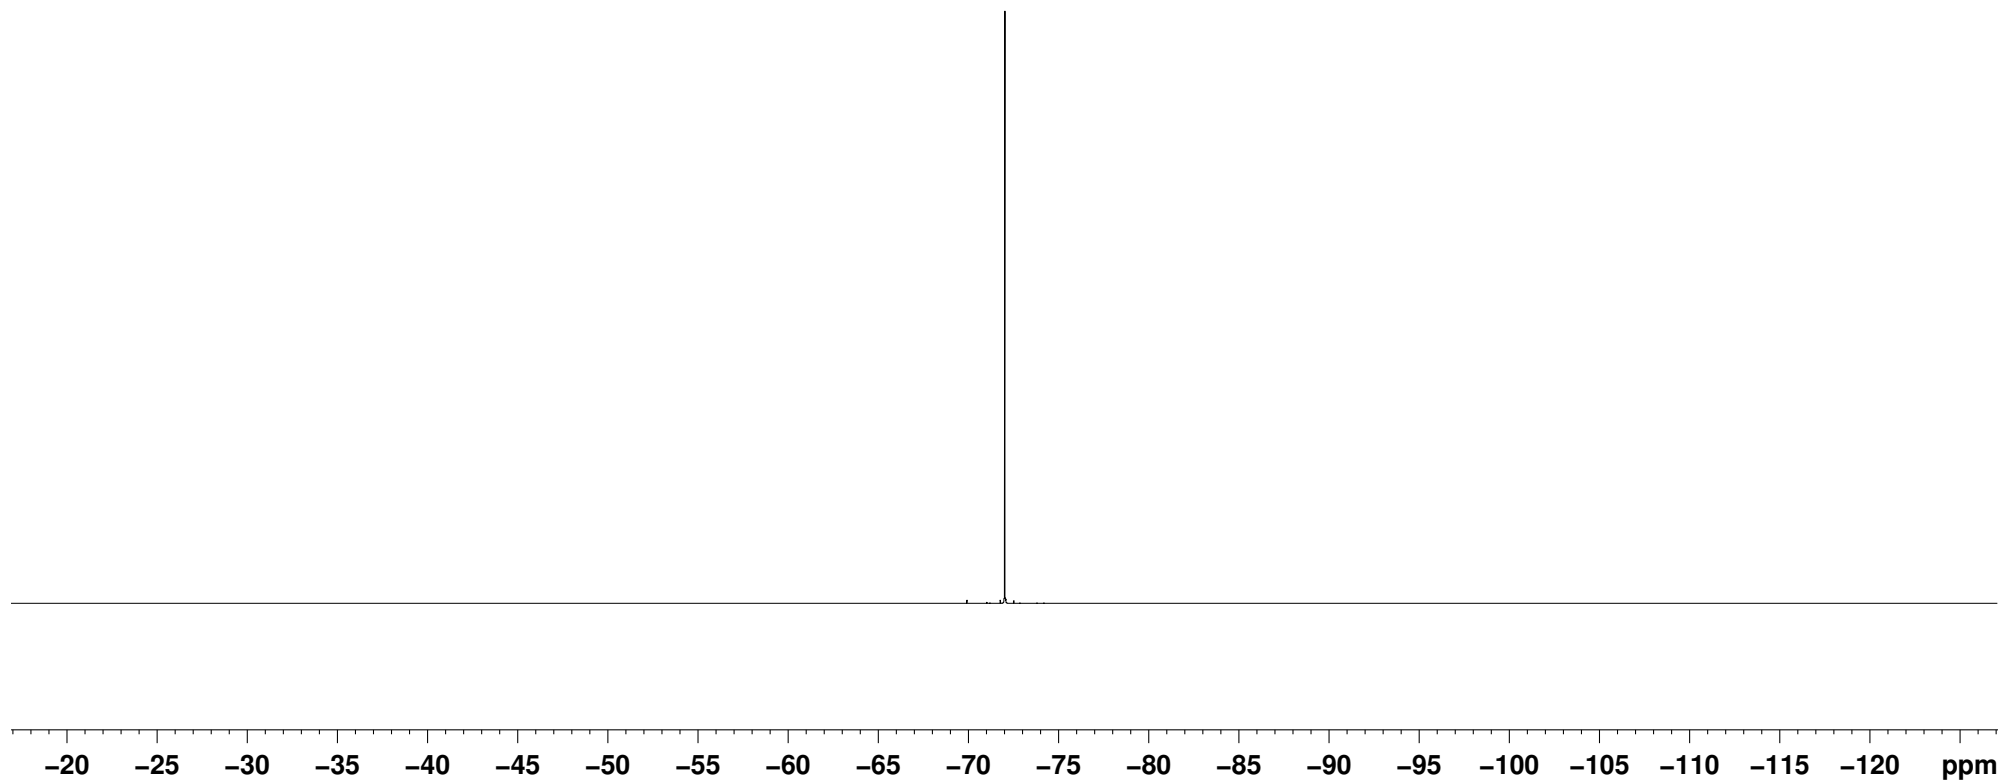

7.434  
7.429  
7.415  
7.398  
7.372  
7.345  
7.286  
7.264  
7.240  
7.230  
7.218  
7.204  
7.177  
7.004  
6.979  
6.937  
6.912  
6.886  
6.604  
6.578  
5.827  
5.820  
5.793  
5.787  
5.594  
5.571  
5.547  
5.522  
5.515  
5.497  
5.490  
5.473  
5.465  
5.440

3.561  
3.552  
3.529  
3.520

2.348  
2.301

0.005  
-0.000

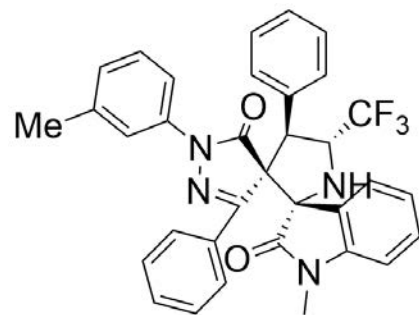

**3sa**

<sup>1</sup>H NMR (300 MHz, CDCl<sub>3</sub>)

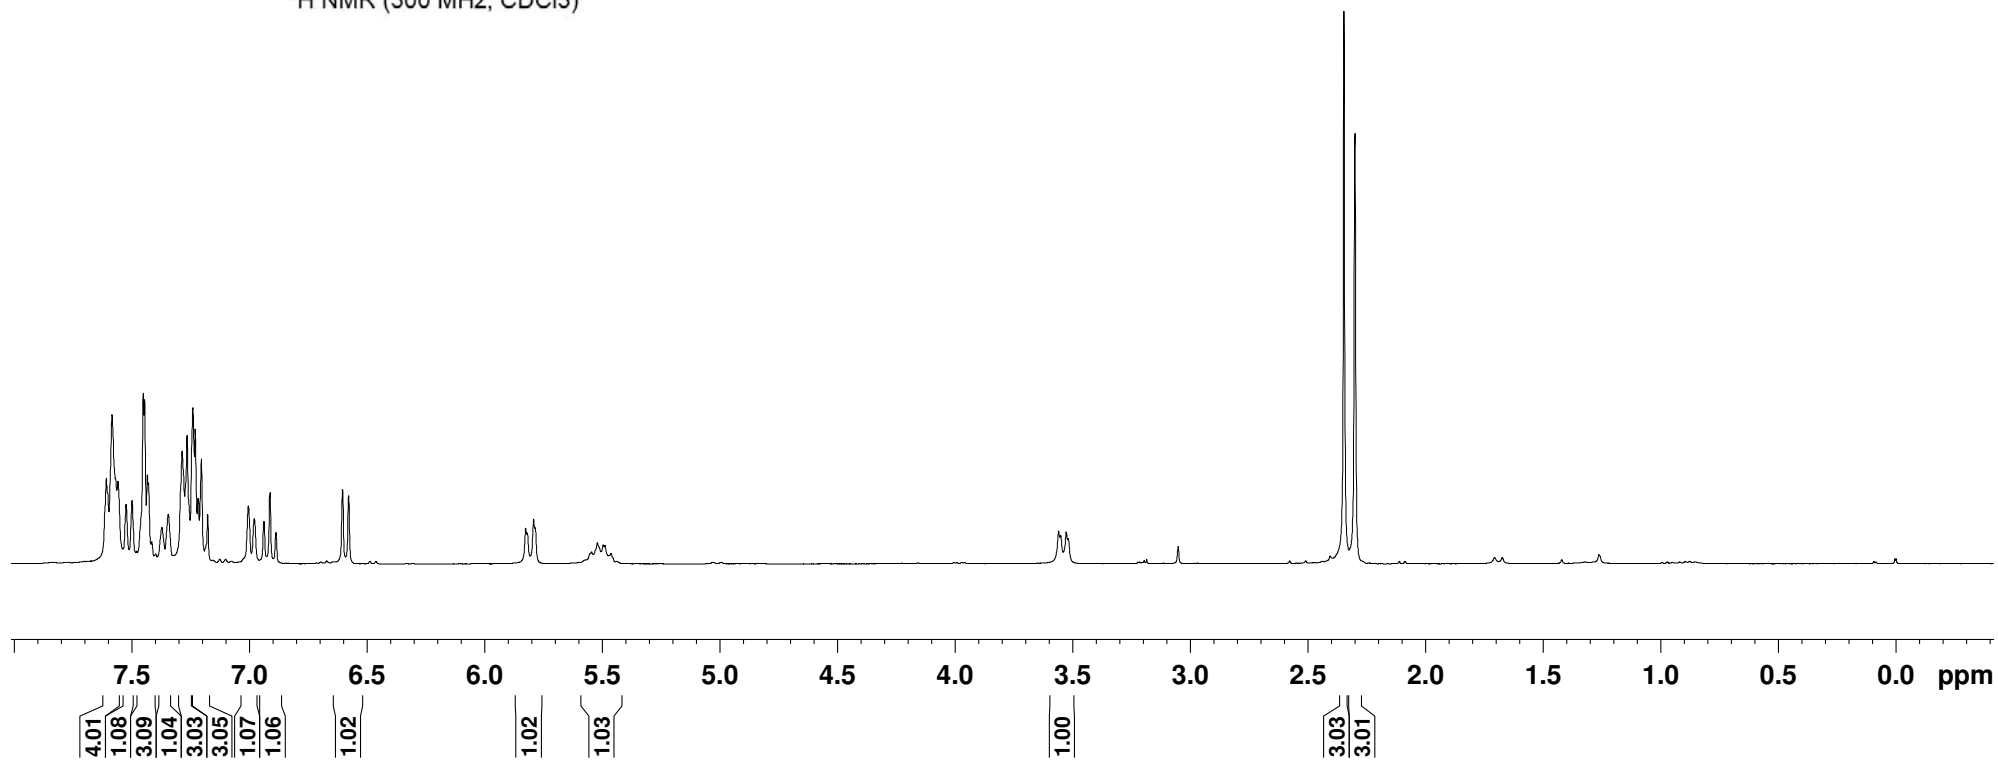

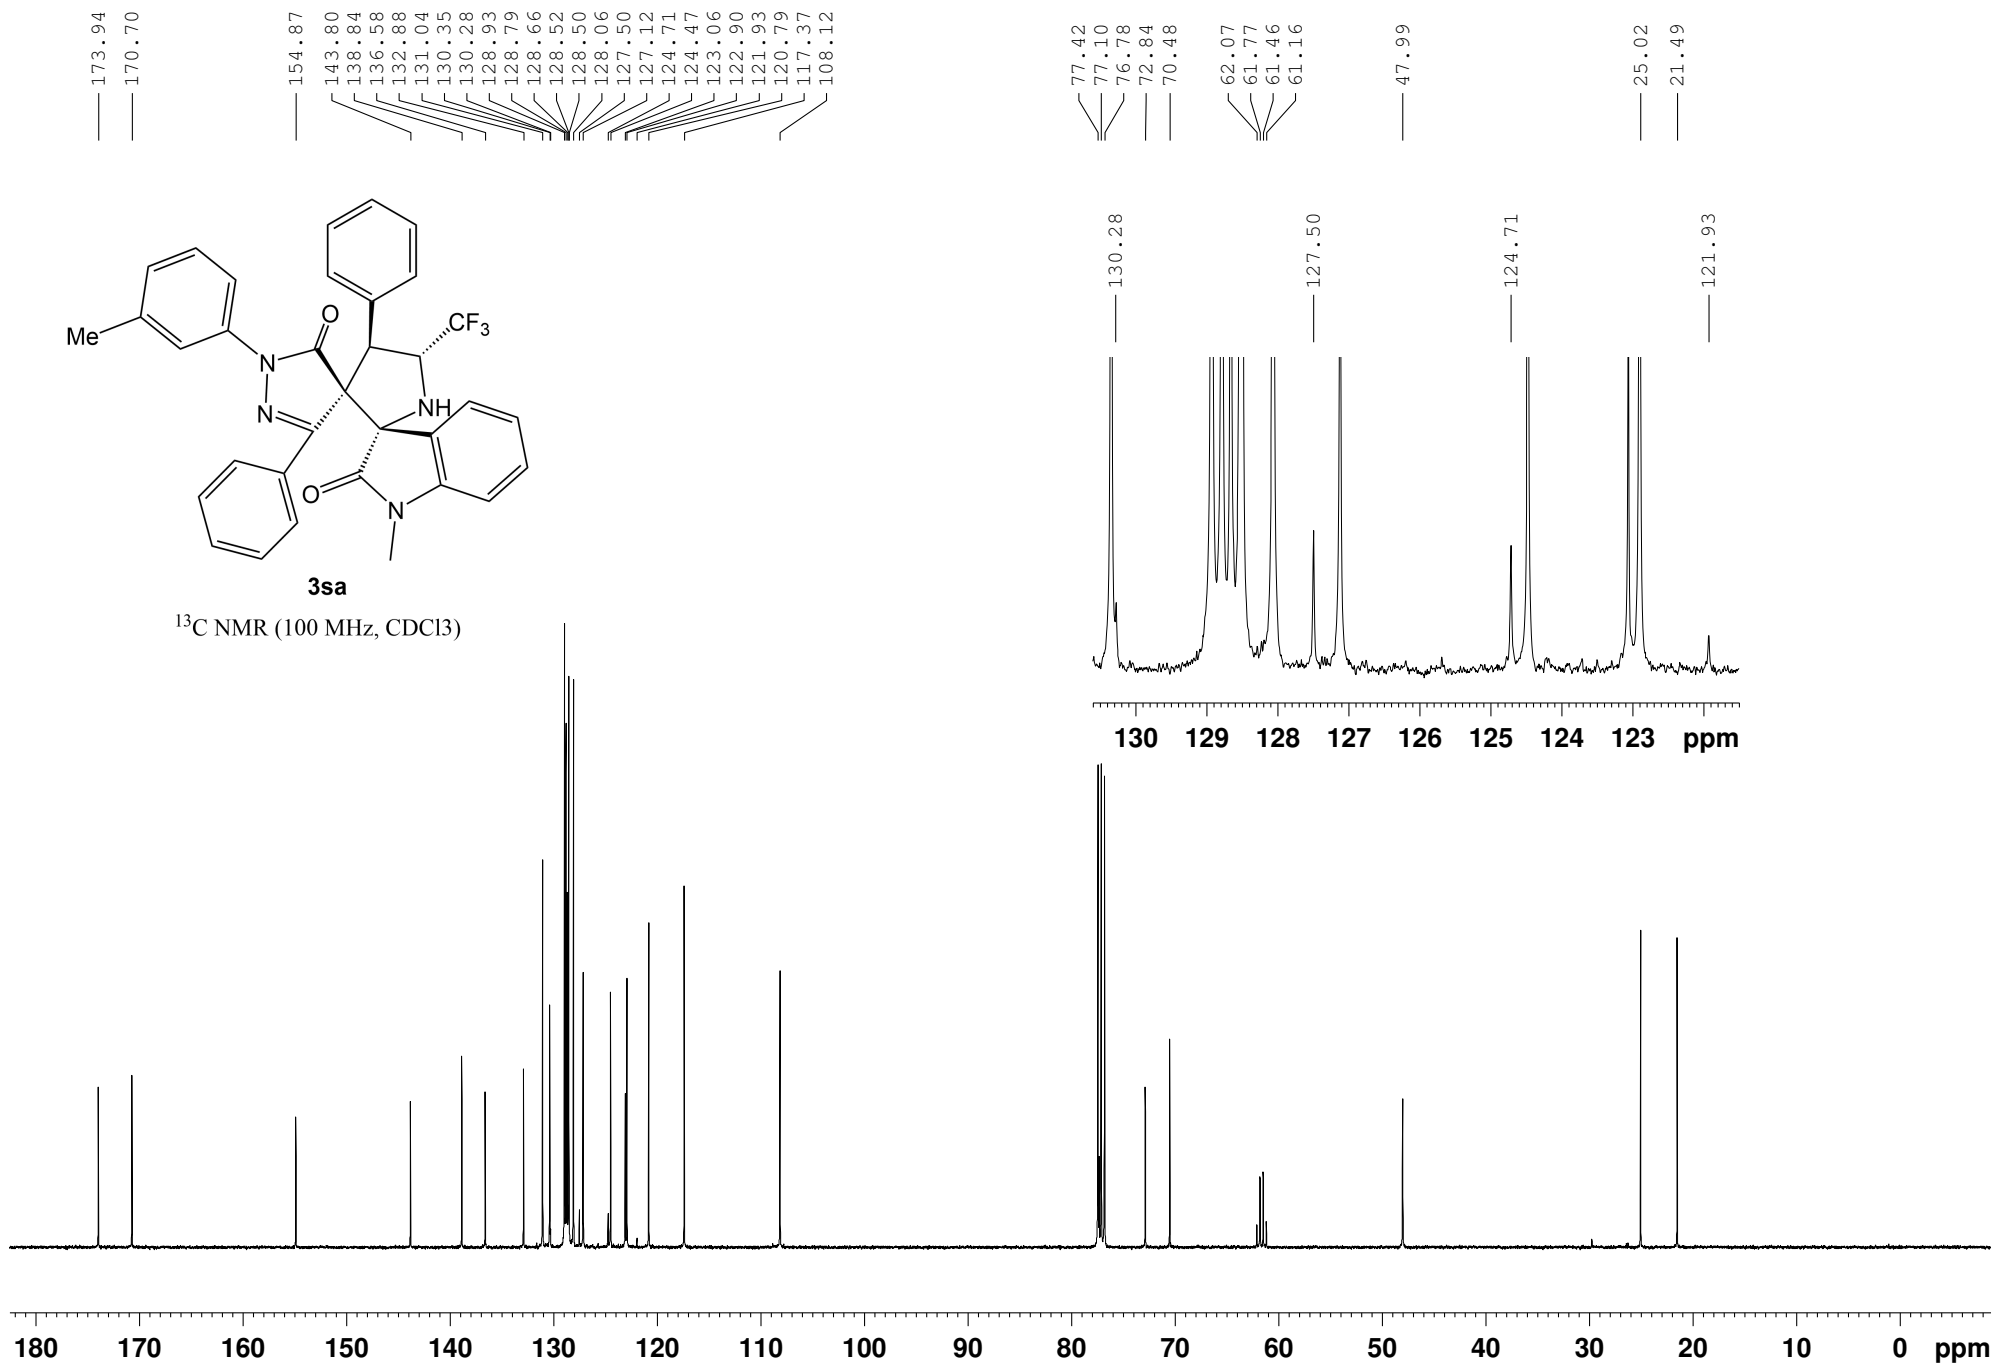

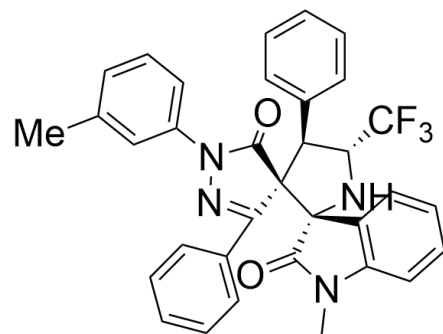

**3sa**

<sup>19</sup>F NMR (282 MHz, CDCl<sub>3</sub>)

— -72.007

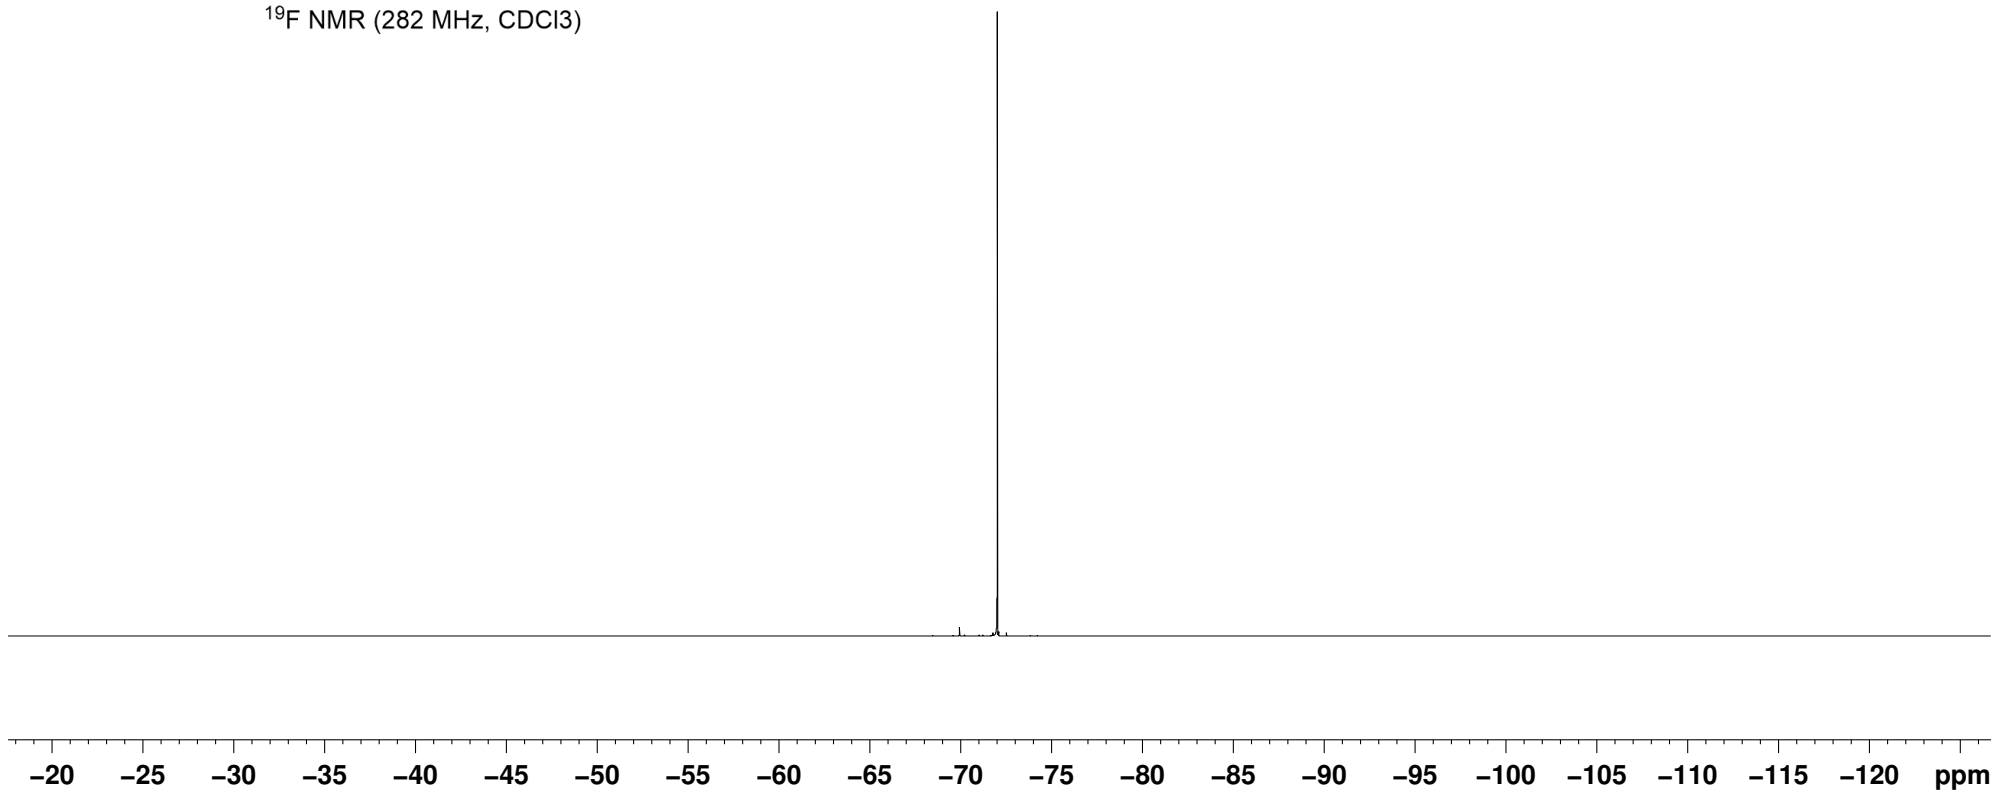

7.447  
7.418  
7.404  
7.393  
7.376  
7.261  
7.236  
7.208  
7.194  
7.175  
7.168  
7.150  
7.125  
7.099  
7.074  
6.850  
6.824  
6.799  
6.541  
6.515  
5.674  
5.641  
5.521  
5.481  
5.457  
5.425  
5.401  
5.375  
5.368  
5.343

3.463  
3.430

2.359

-0.000

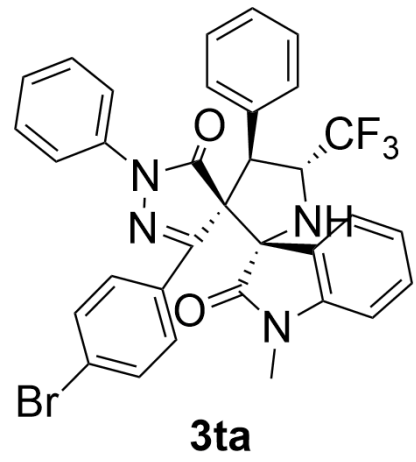

<sup>1</sup>H NMR (300 MHz, CDCl<sub>3</sub>)

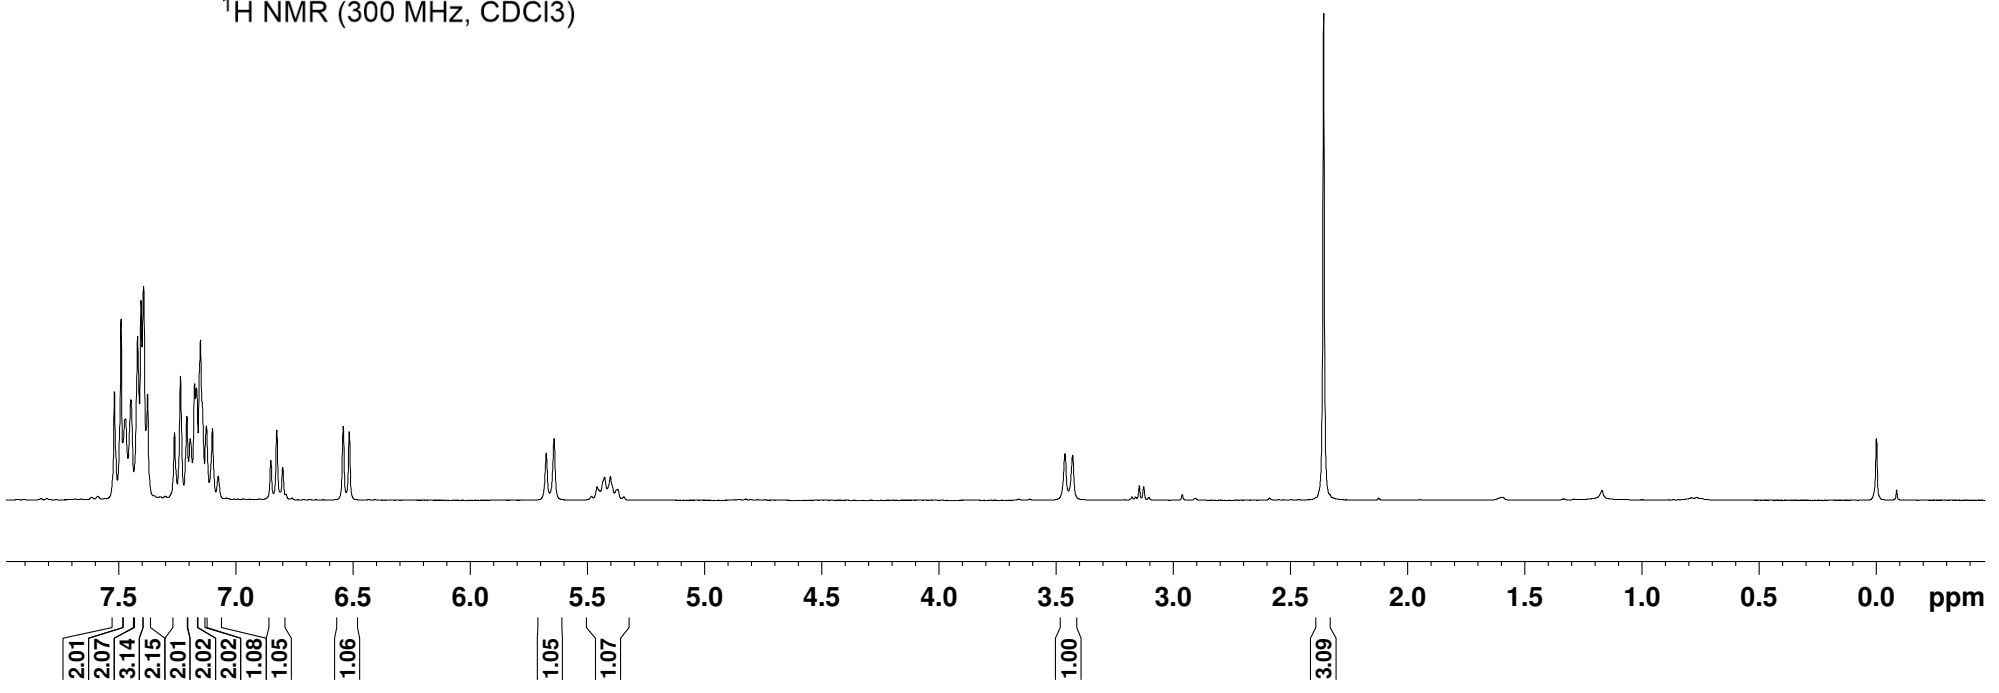

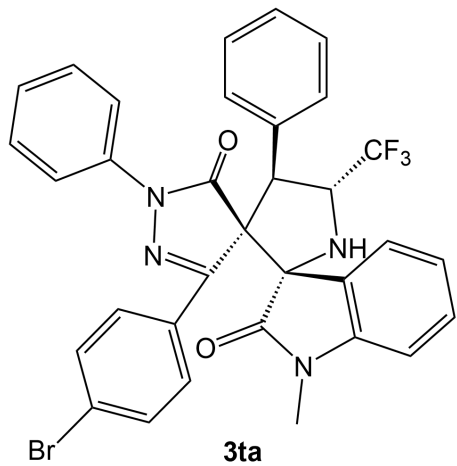

<sup>13</sup>C NMR (100 MHz, CDCl<sub>3</sub>)

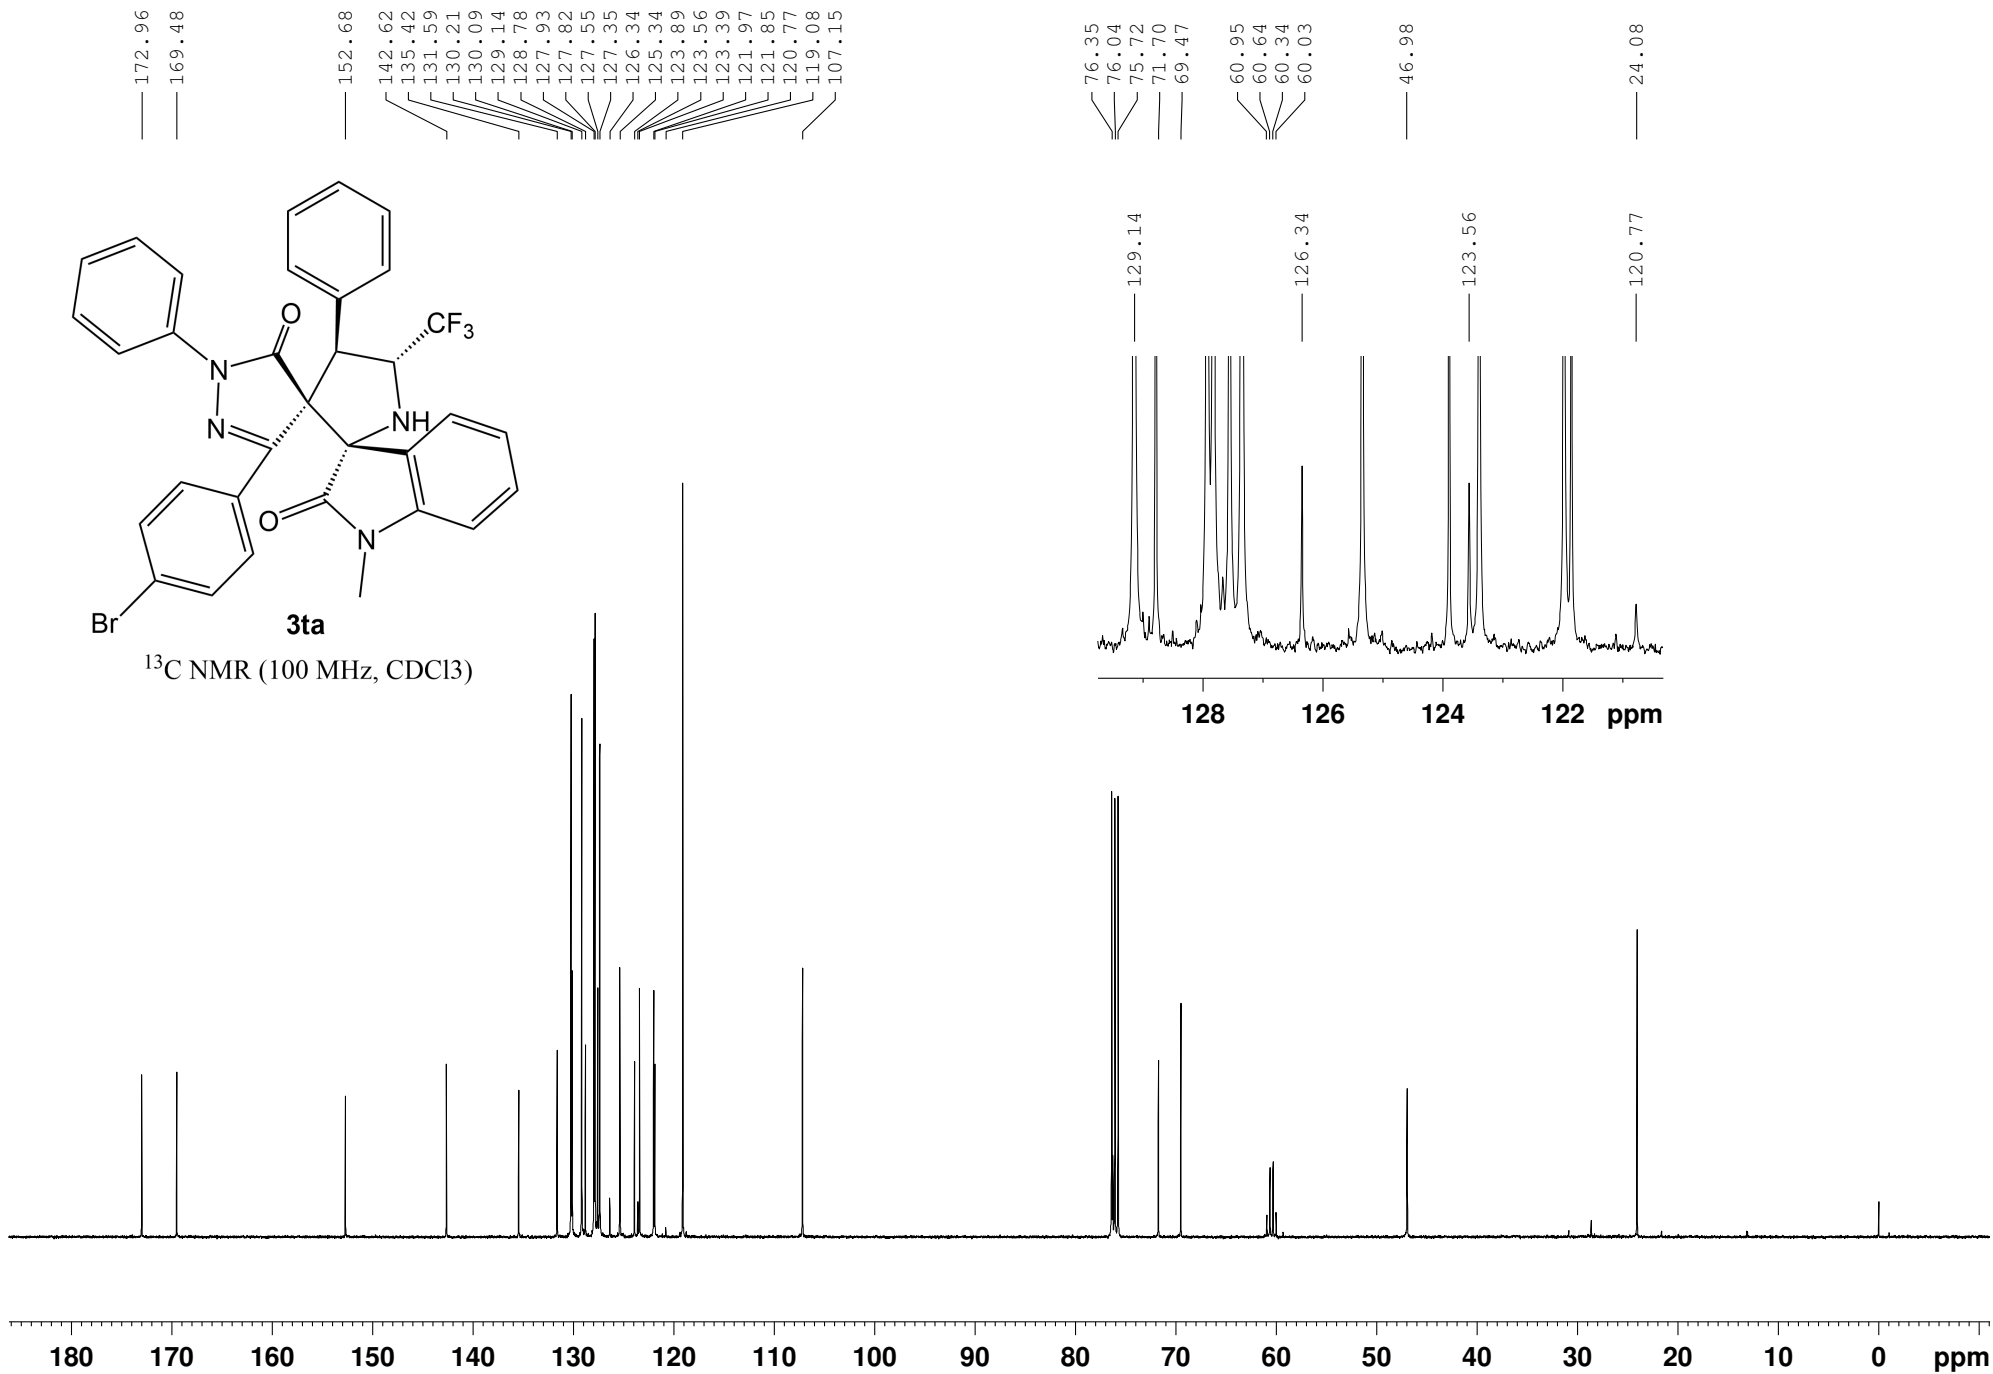

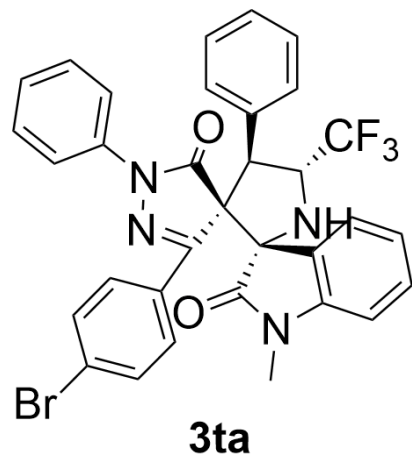

$^{19}\text{F}$  NMR (282 MHz,  $\text{CDCl}_3$ )

— -72.154

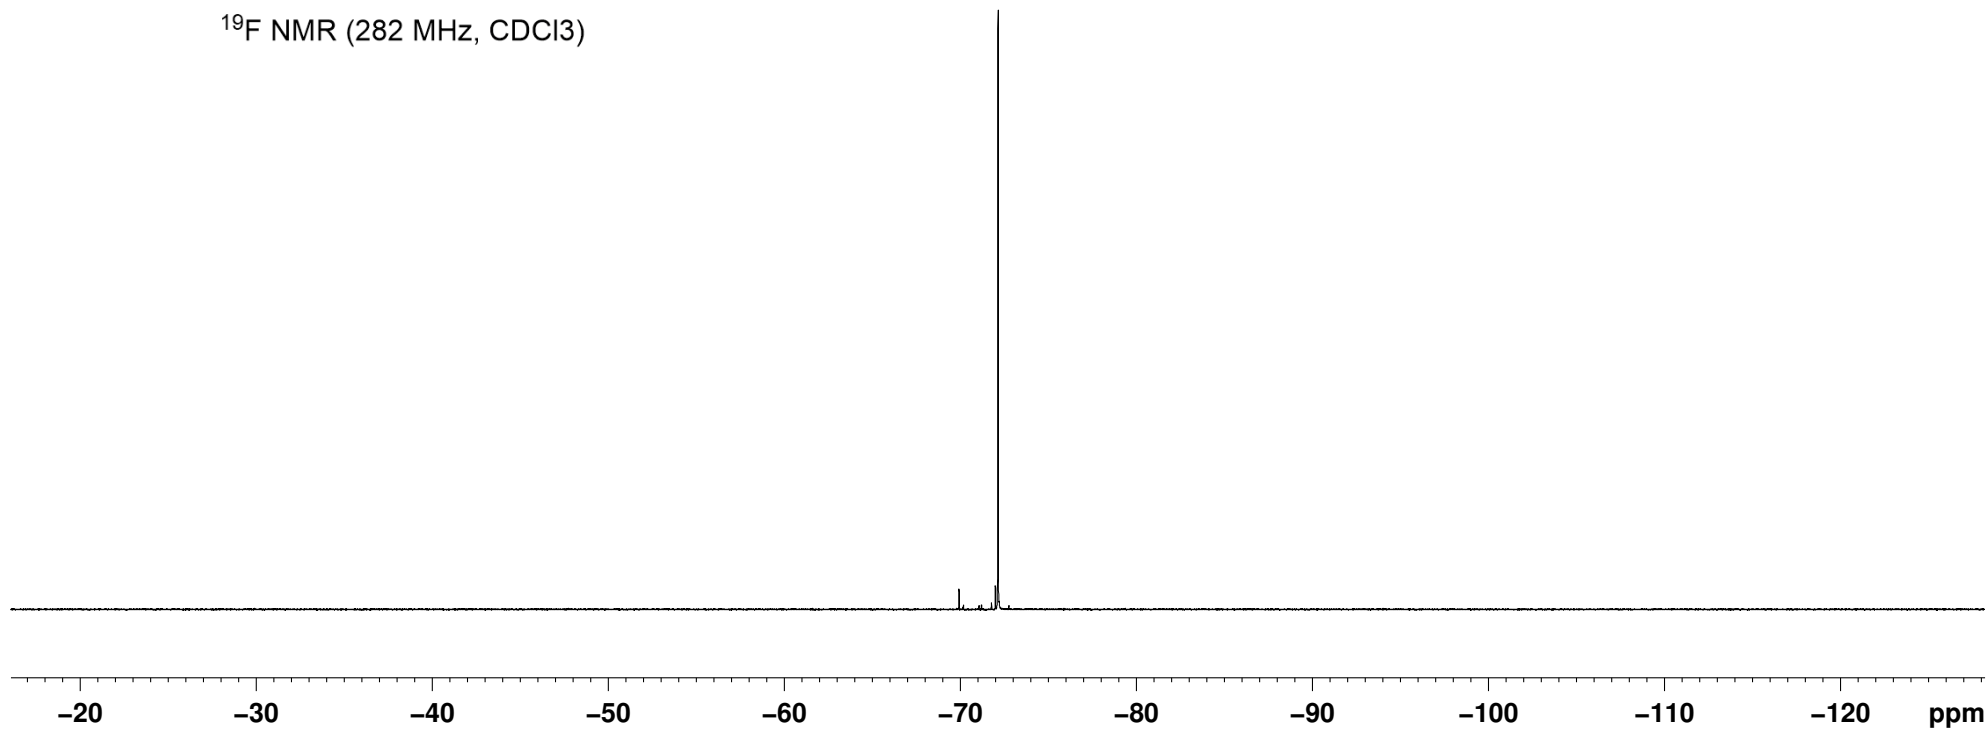



7.284  
7.272  
7.263  
7.253  
7.249  
7.245  
7.238  
7.223  
7.212  
7.203  
7.178  
7.154  
6.978  
6.948  
6.931  
6.905  
6.880  
6.619  
6.593  
5.831  
5.778  
5.744  
5.696  
5.660  
5.635  
5.602  
5.582  
5.557  
5.532  
5.524  
5.500  
5.474  
5.467  
5.442

3.860

3.552  
3.519

2.438

0.000

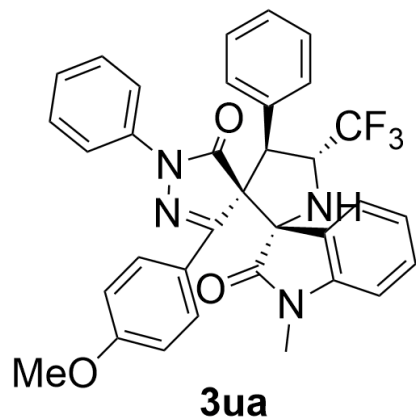

<sup>1</sup>H NMR (300 MHz, CDCl<sub>3</sub>)

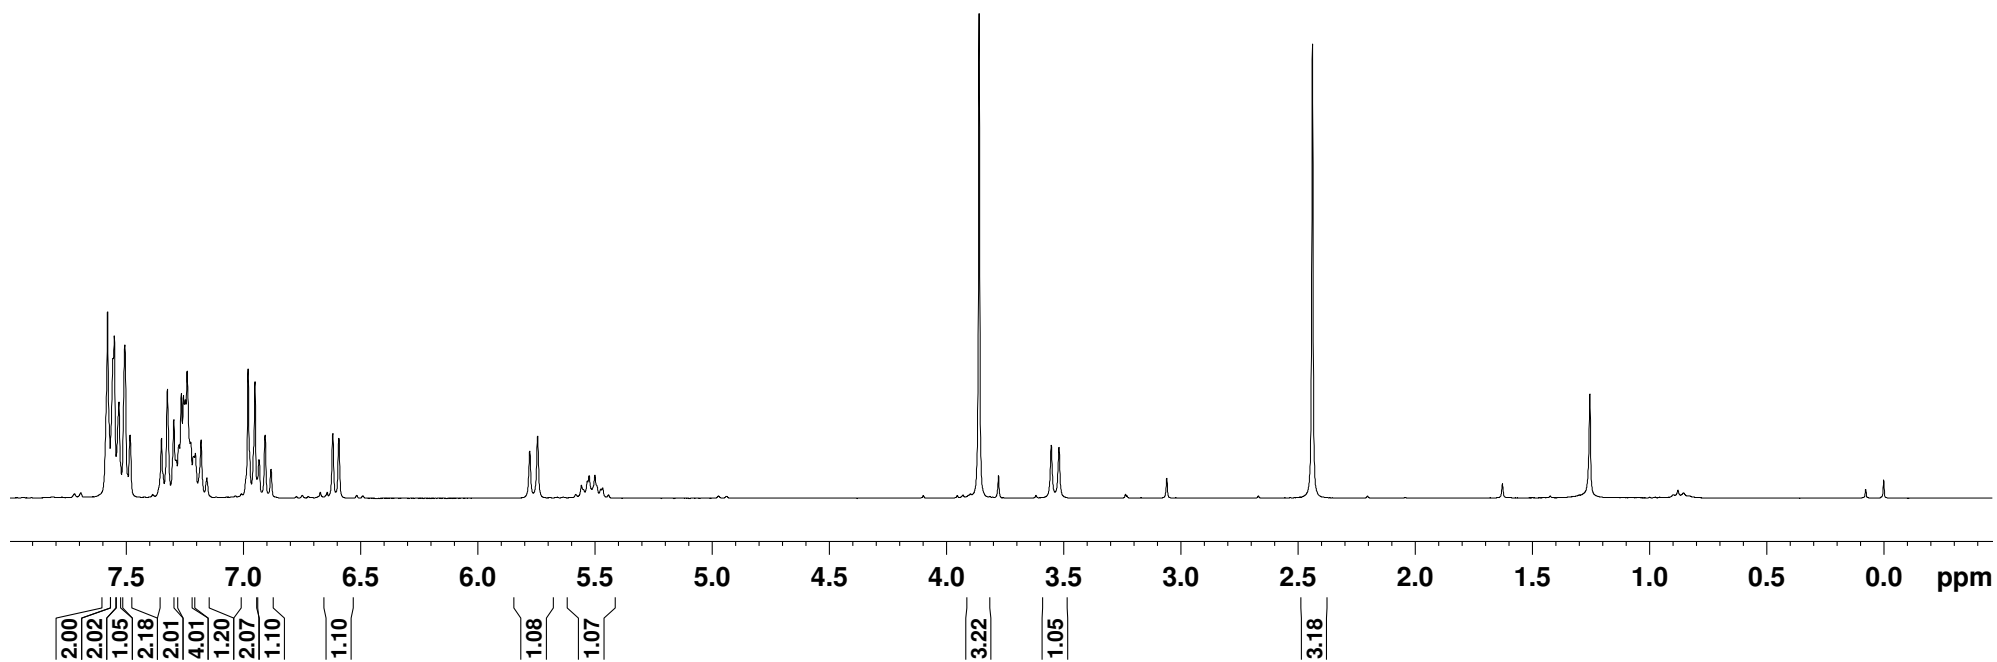

— 173.05  
 — 169.53  
 — 160.26  
 — 153.41  
 — 142.74  
 — 135.66  
 — 131.87  
 — 129.93  
 — 129.27  
 — 127.83  
 — 127.74  
 — 127.41  
 — 126.46  
 — 125.05  
 — 123.68  
 — 123.34  
 — 122.43  
 — 122.00  
 — 121.77  
 — 120.89  
 — 119.03  
 — 112.40  
 — 107.02

— 76.37  
 — 76.05  
 — 75.74  
 — 71.88  
 — 69.58  
 — 60.99  
 — 60.69  
 — 60.38  
 — 60.07  
 — 54.36  
 — 46.80  
 — 24.15  
 — 0.00

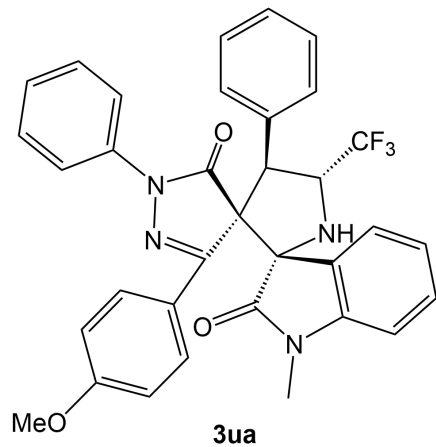

<sup>13</sup>C NMR (100 MHz, CDCl<sub>3</sub>)

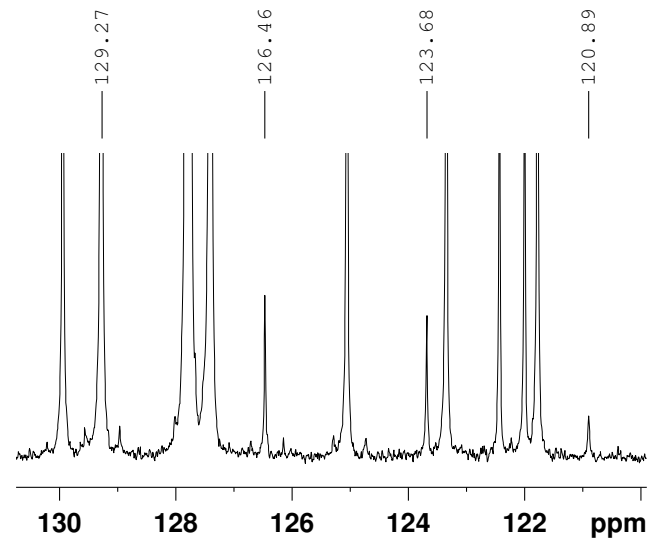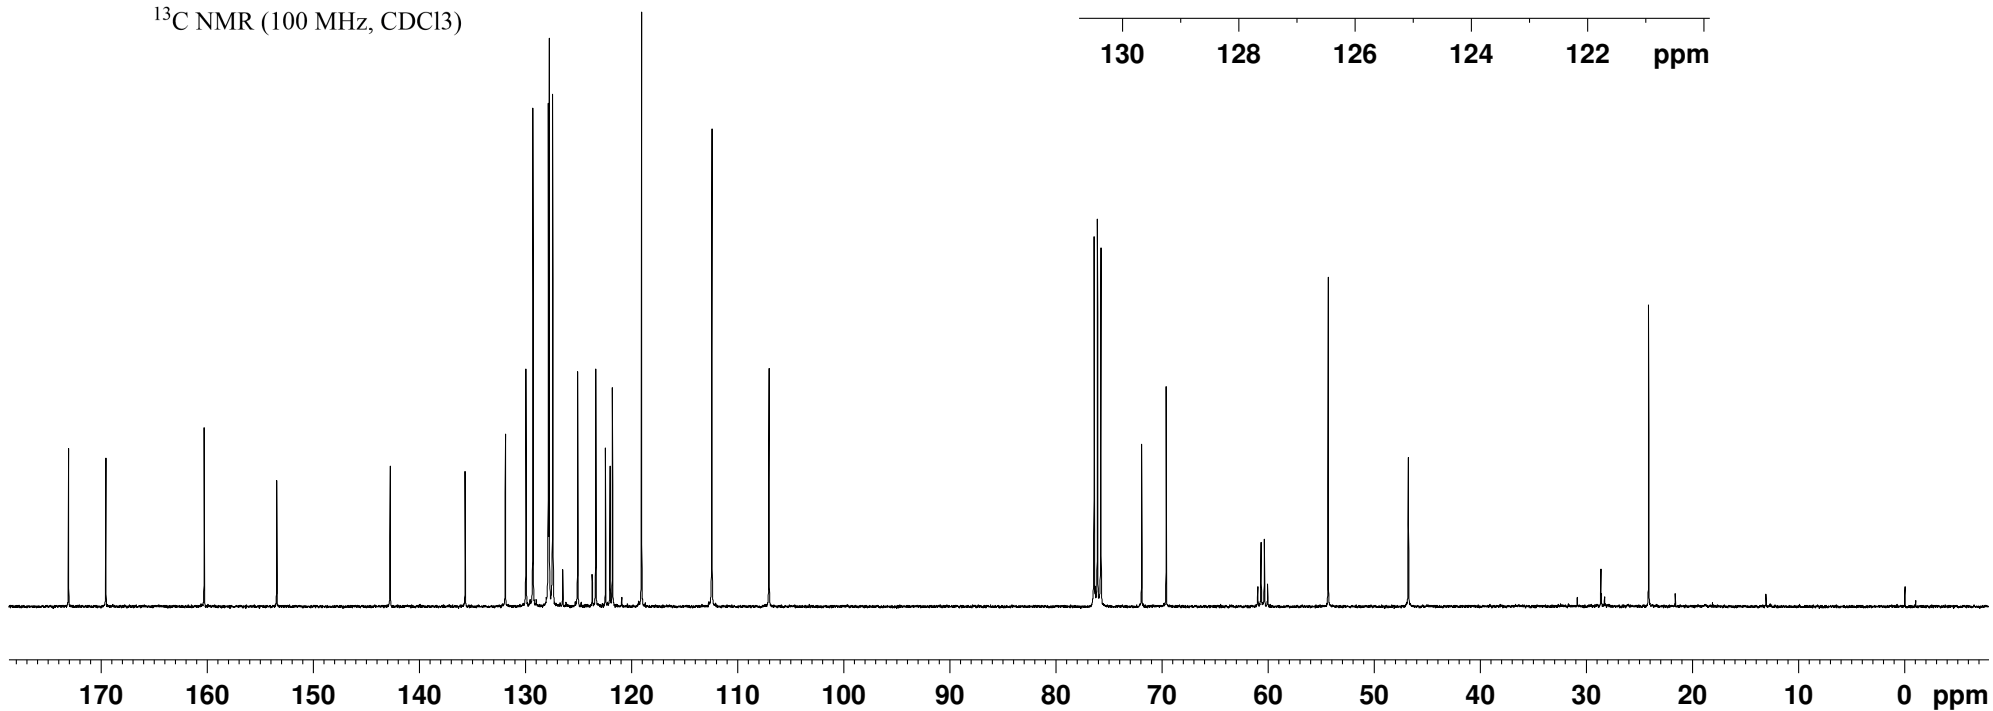

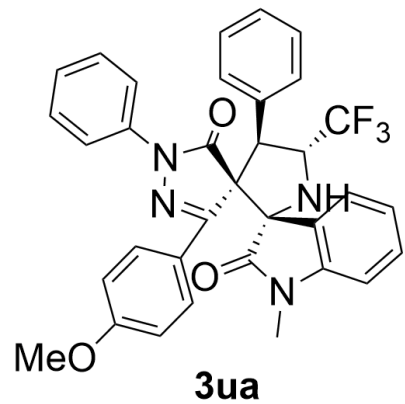

$^{19}\text{F}$  NMR (282 MHz,  $\text{CDCl}_3$ )

— -72.130

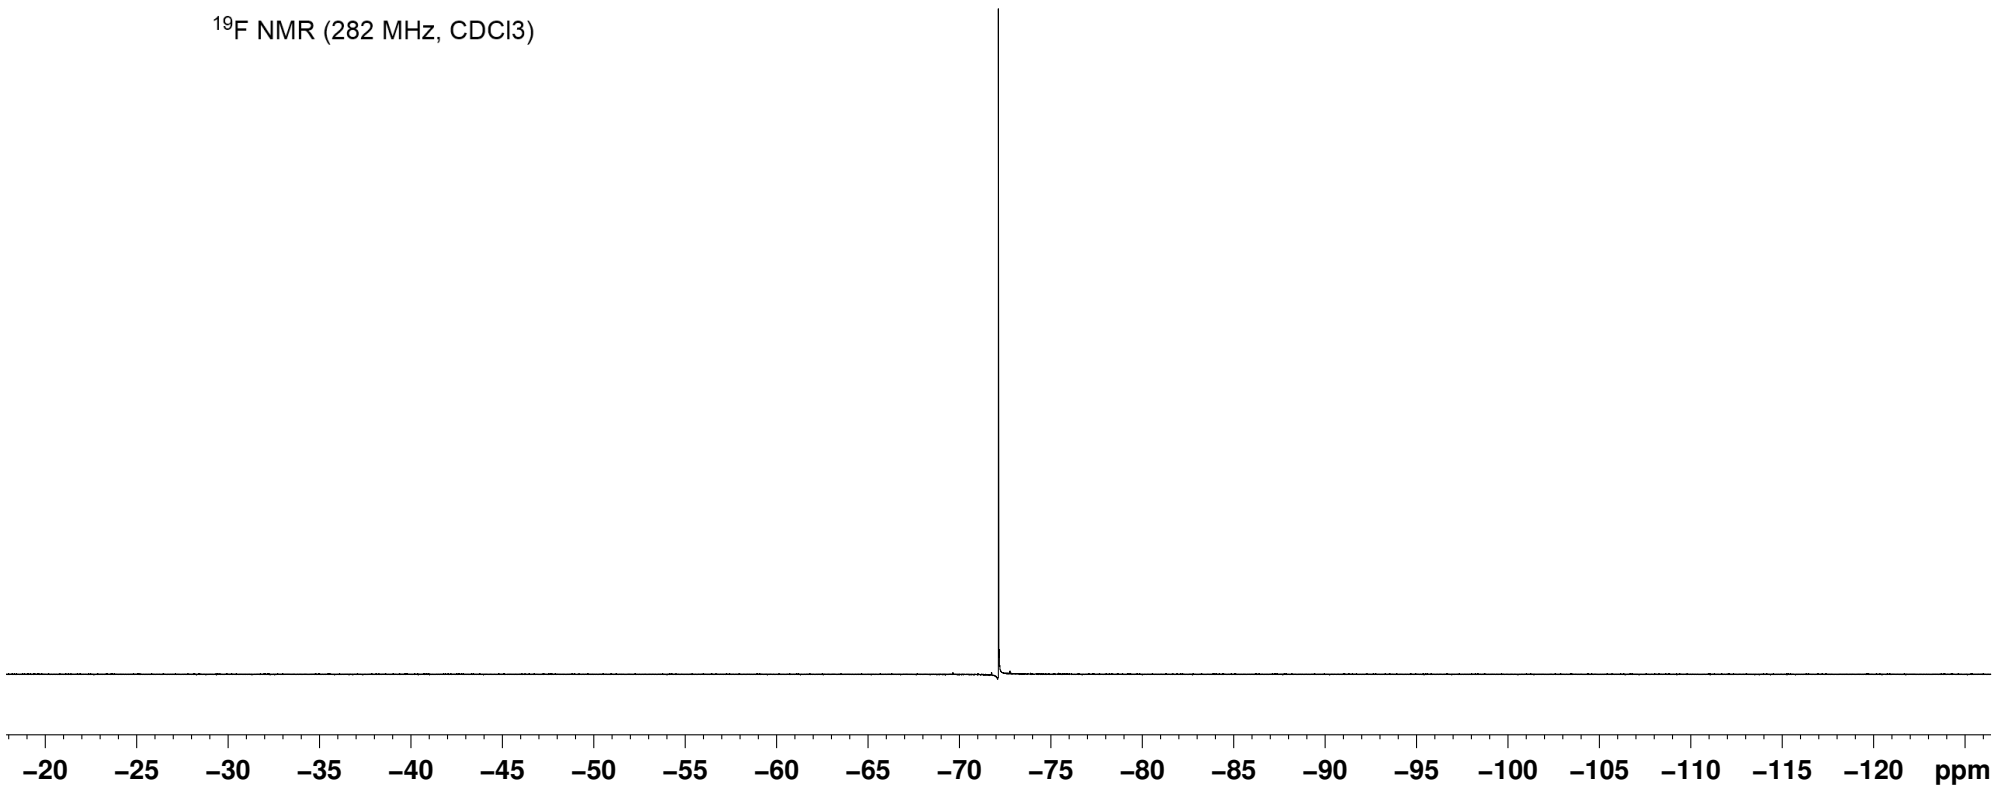

7.667  
7.642  
7.586  
7.560  
7.388  
7.367  
7.343  
7.317  
7.298  
7.270  
7.237  
7.219  
7.208  
7.195  
7.184  
6.953  
6.928  
6.902  
6.647  
6.621

5.863  
5.830  
5.464  
5.439  
5.407  
5.382  
5.356  
5.350  
5.325

3.521  
3.488

2.455

1.742

-0.000

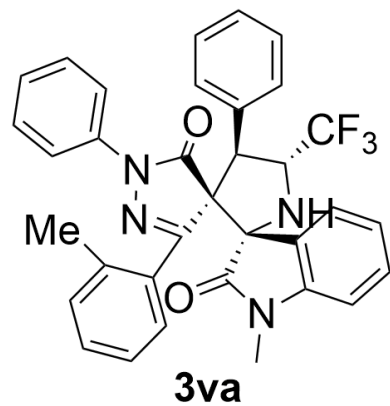

<sup>1</sup>H NMR (300 MHz, CDCl<sub>3</sub>)

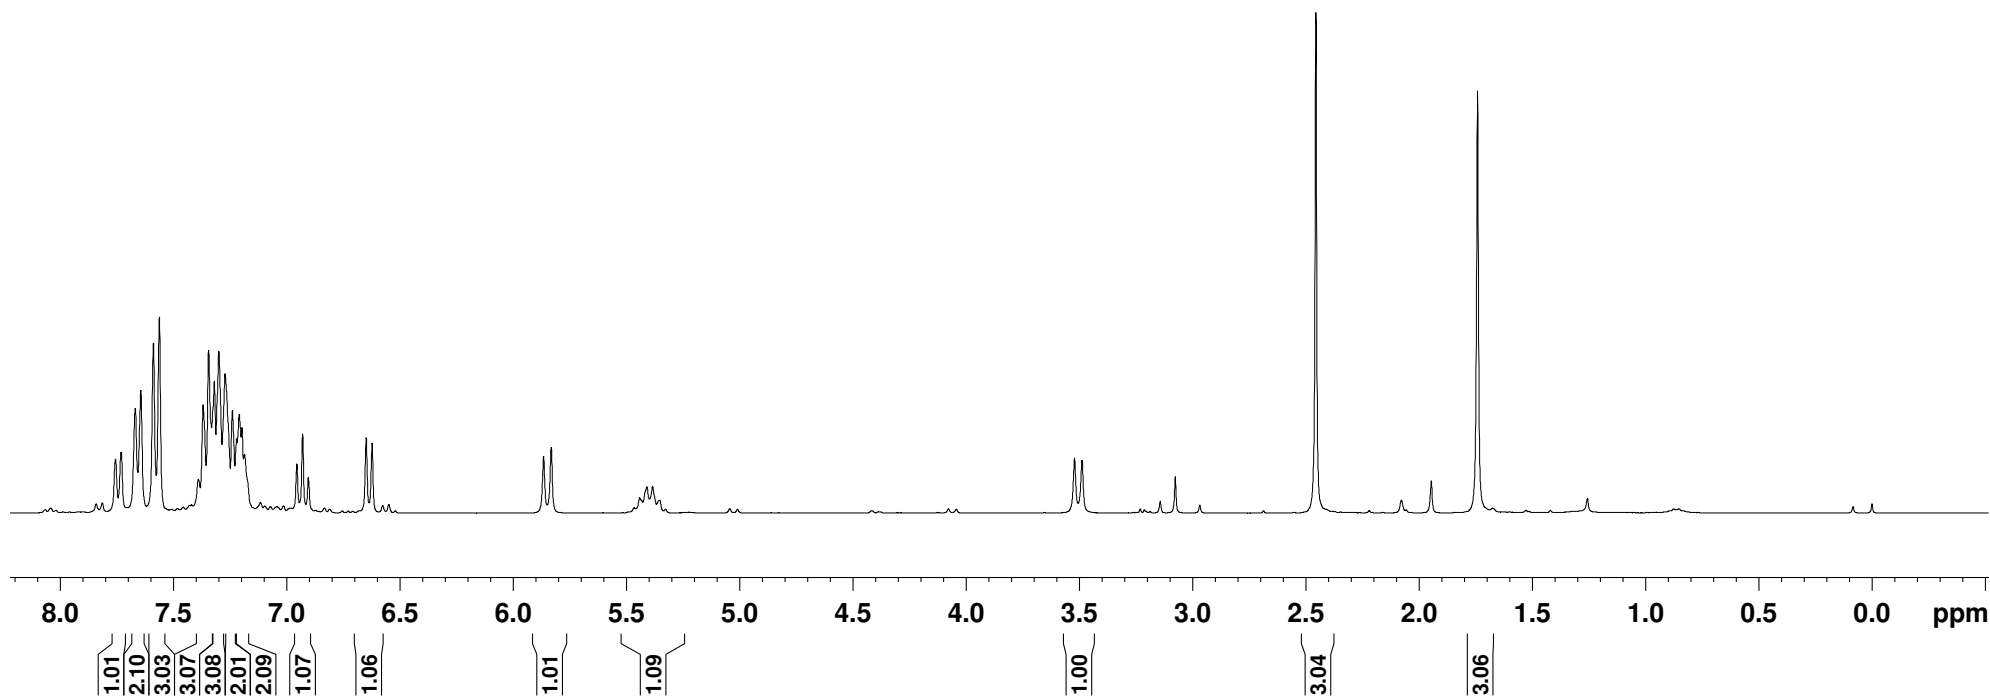

— 173.54  
 — 170.58  
 — 154.31  
 — 144.53  
 — 137.80  
 — 136.83  
 — 132.93  
 — 131.10  
 — 130.48  
 — 130.42  
 — 130.21  
 — 129.65  
 — 129.34  
 — 128.94  
 — 128.88  
 — 128.70  
 — 128.61  
 — 127.42  
 — 126.15  
 — 125.47  
 — 124.92  
 — 124.64  
 — 123.45  
 — 123.06  
 — 121.85  
 — 119.92  
 — 108.14

— 77.37  
 — 77.05  
 — 76.73  
 — 73.12  
 — 69.25  
 — 62.27  
 — 61.97  
 — 61.66  
 — 61.36  
 — 48.55  
 — 25.27  
 — 20.62

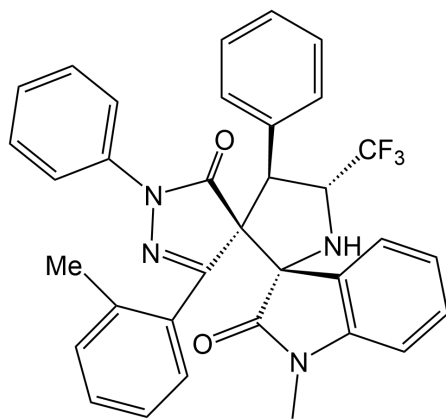

**3va**

<sup>13</sup>C NMR (100 MHz, CDCl<sub>3</sub>)

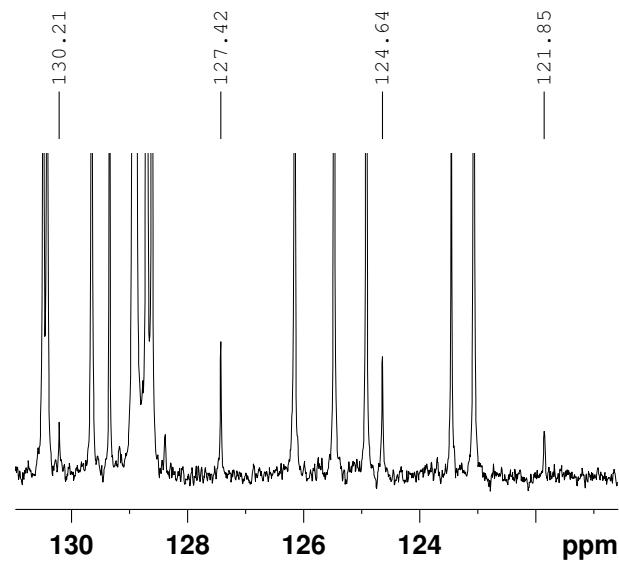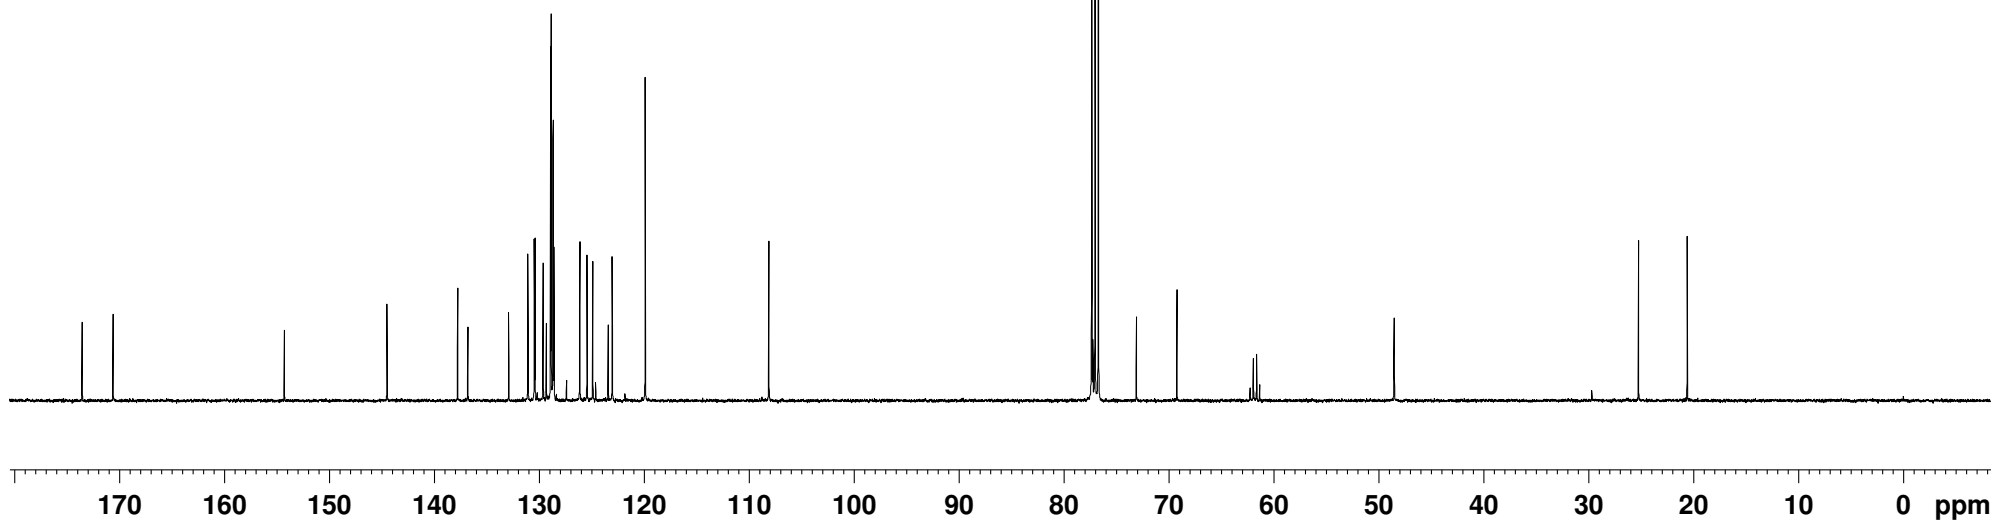

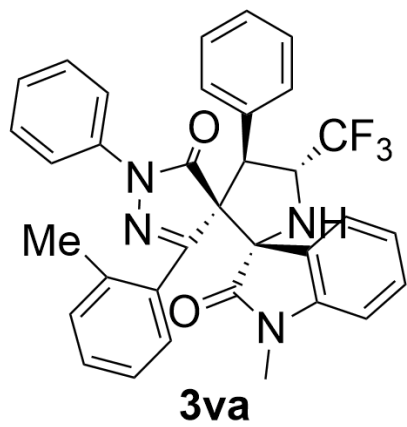

$^{19}\text{F}$  NMR (282 MHz,  $\text{CDCl}_3$ )

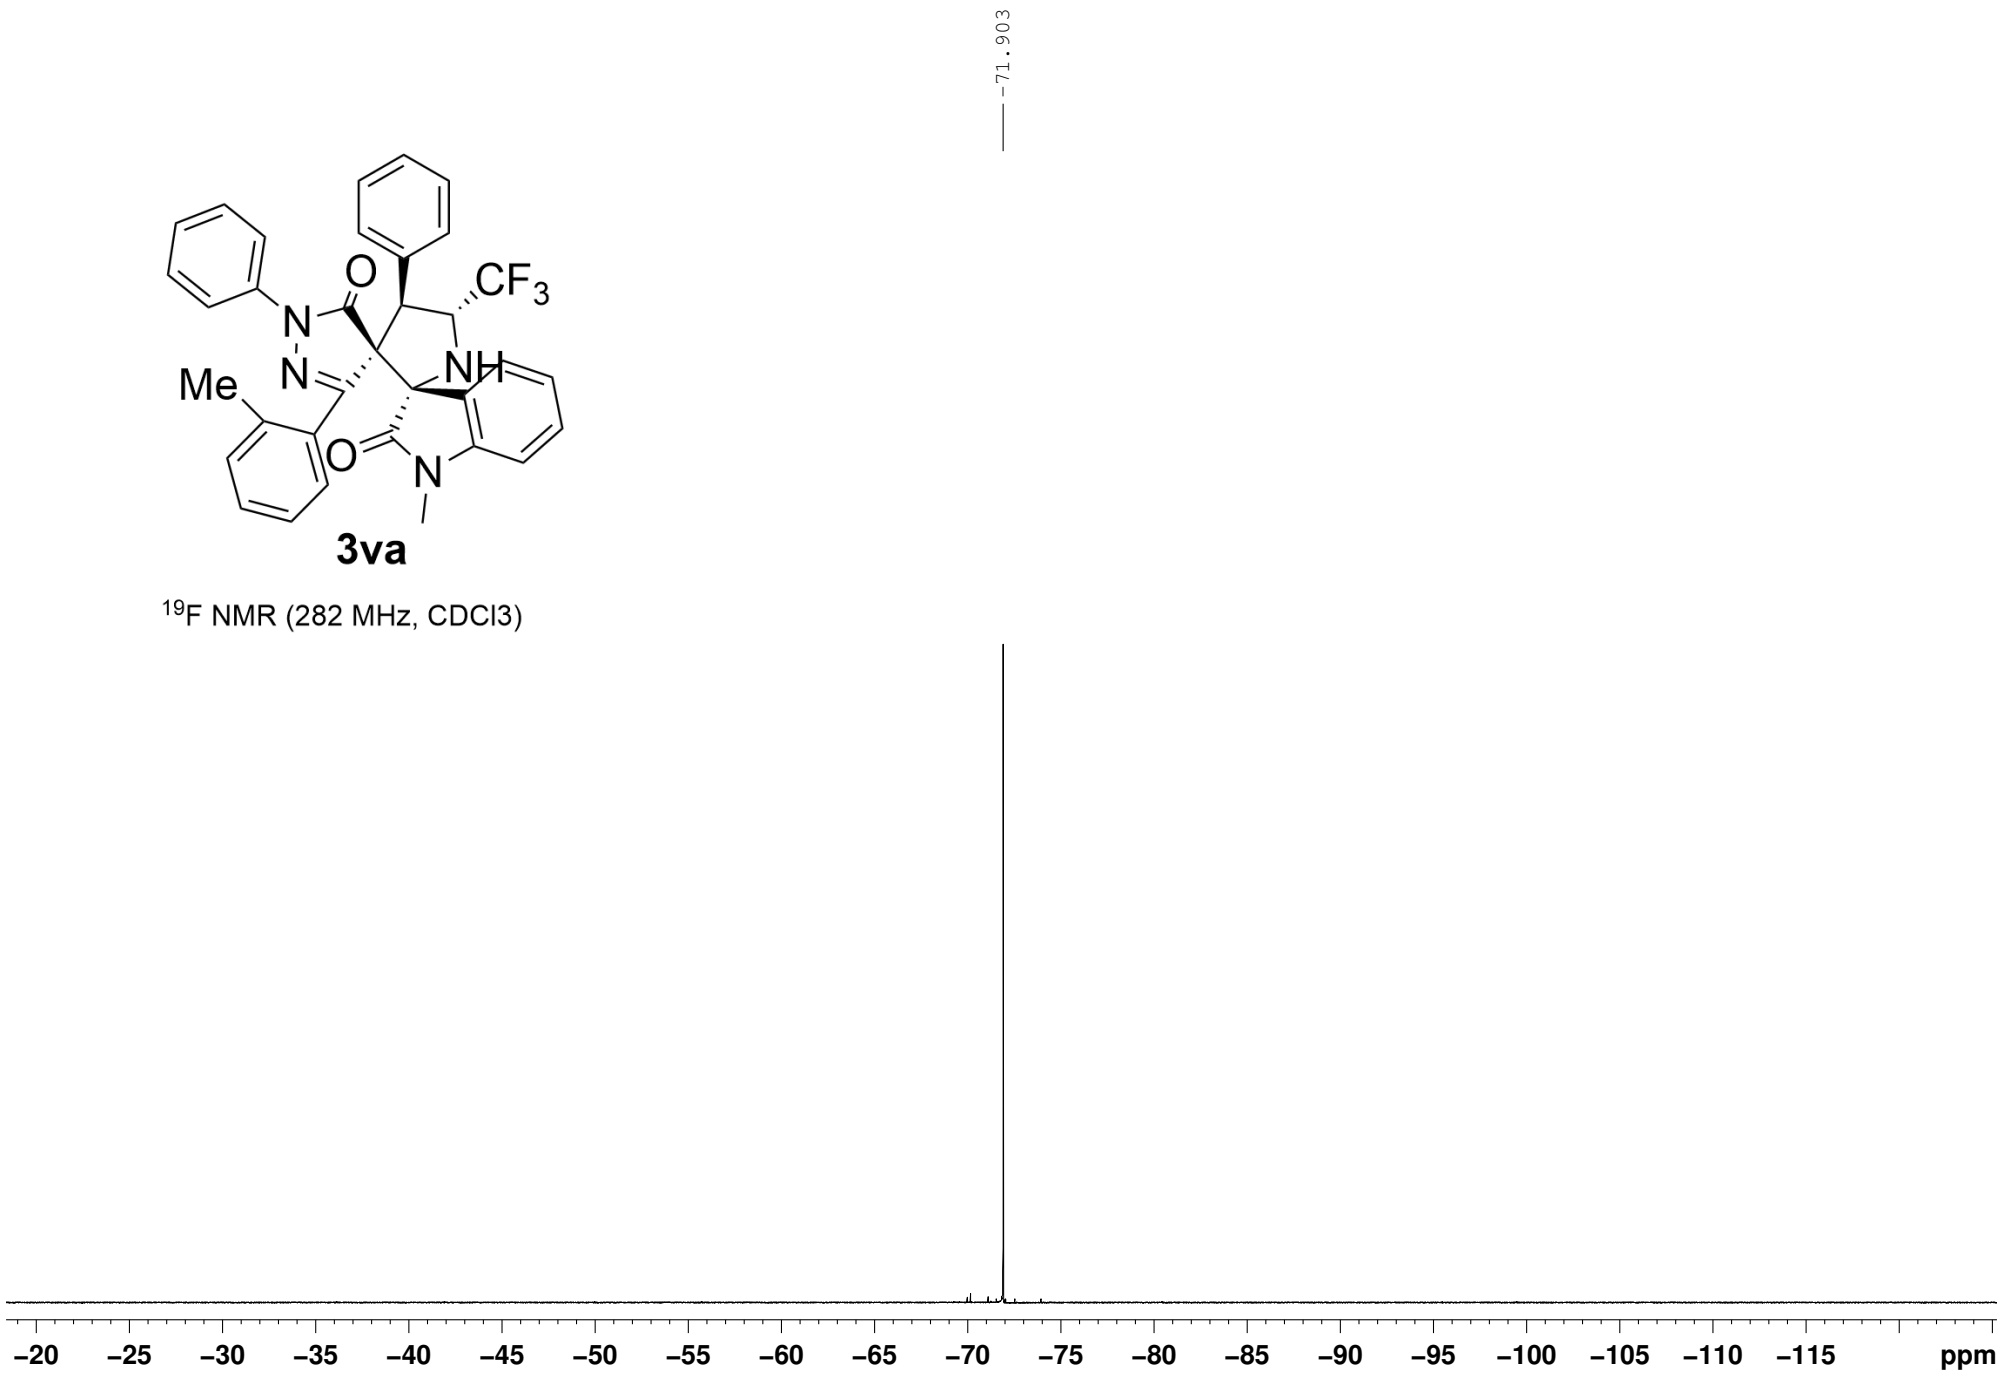

7.905  
7.880  
7.757  
7.730  
7.479  
7.470  
7.461  
7.443  
7.416  
7.394  
7.370  
7.343  
7.293  
7.254  
7.239  
7.202  
7.177  
7.152  
6.854  
6.828  
5.399  
5.365  
5.339  
5.305  
4.628  
4.592  
4.018  
3.983  
3.095  
2.062  
2.040  
2.018  
1.995  
1.973  
1.649  
1.258  
0.796  
0.773  
0.317  
0.295  
-0.000

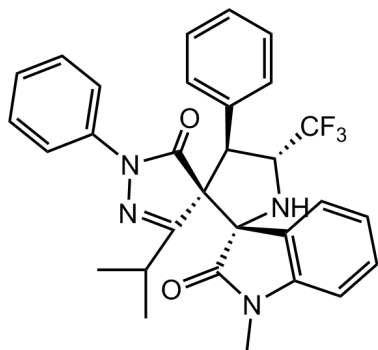

**3wa**

<sup>1</sup>H NMR (300 MHz, CDCl<sub>3</sub>)

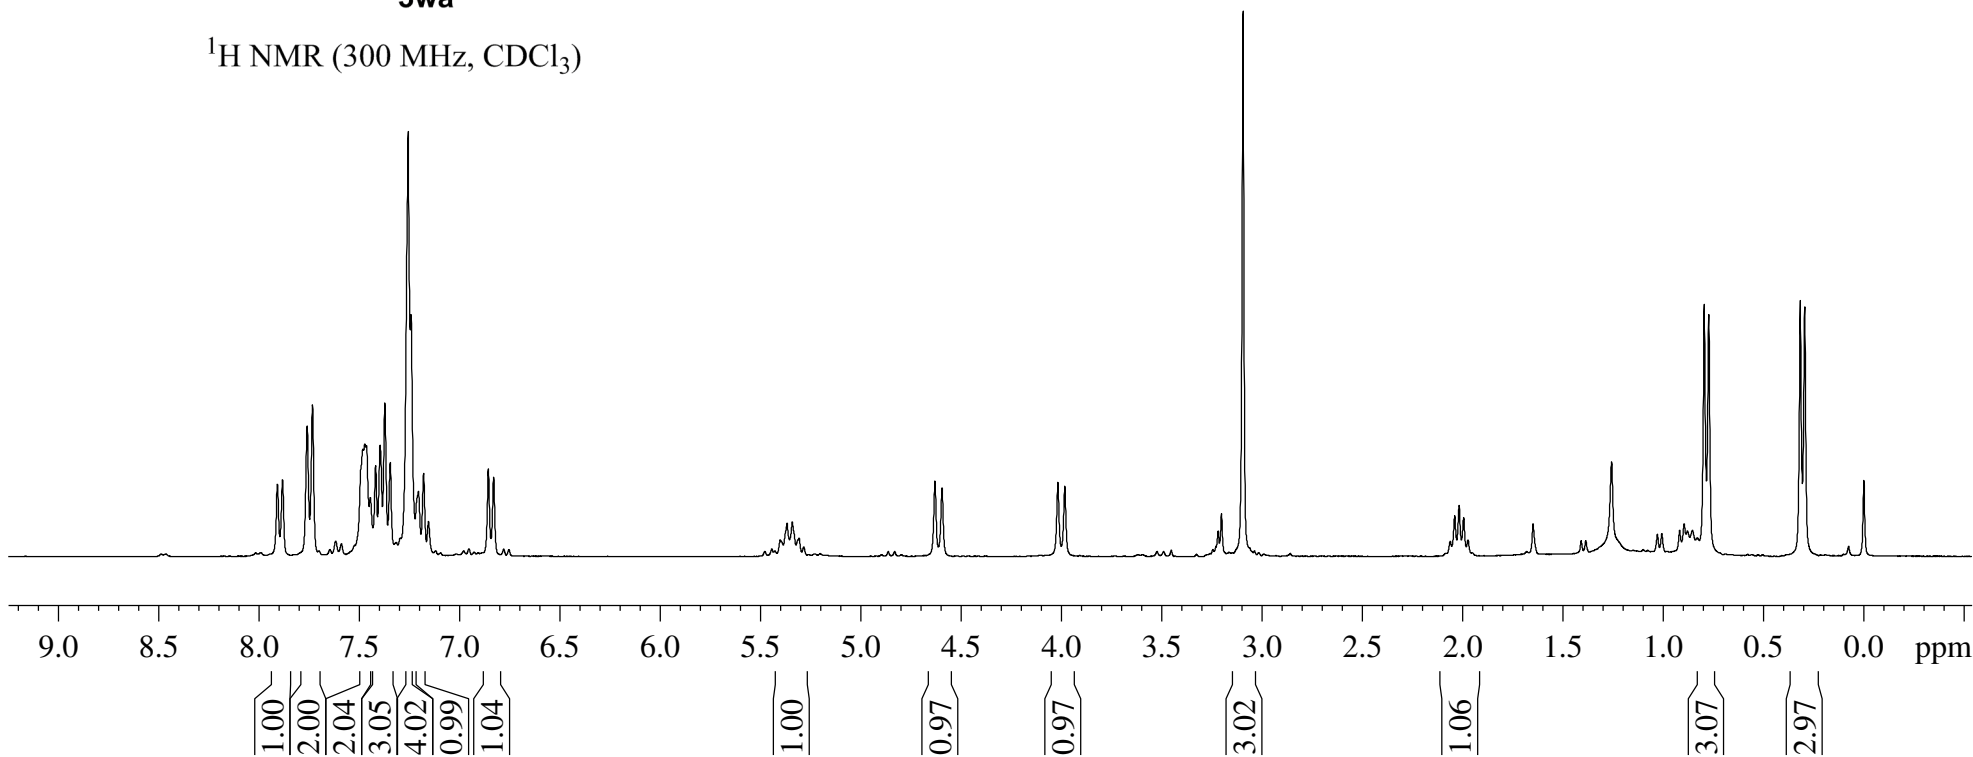

— 172.80  
 — 169.09  
 — 162.65  
 — 143.28  
 — 137.38  
 — 132.37  
 — 130.46  
 — 130.15  
 — 129.49  
 — 128.87  
 — 128.84  
 — 128.76  
 — 126.02  
 — 125.44  
 — 123.17  
 — 119.59  
 — 109.12

77.46  
 77.04  
 76.61  
 72.55  
 71.75  
 63.21  
 62.82  
 62.42  
 62.03  
 50.85  
 28.49  
 27.03  
 22.82  
 20.81

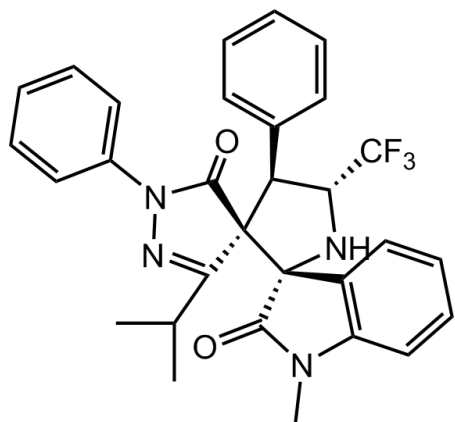

**3wa**

$^{13}\text{C}$  NMR (75 MHz,  $\text{CDCl}_3$ )

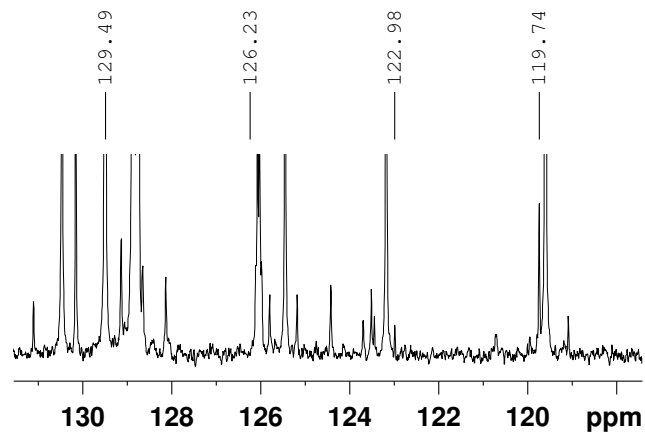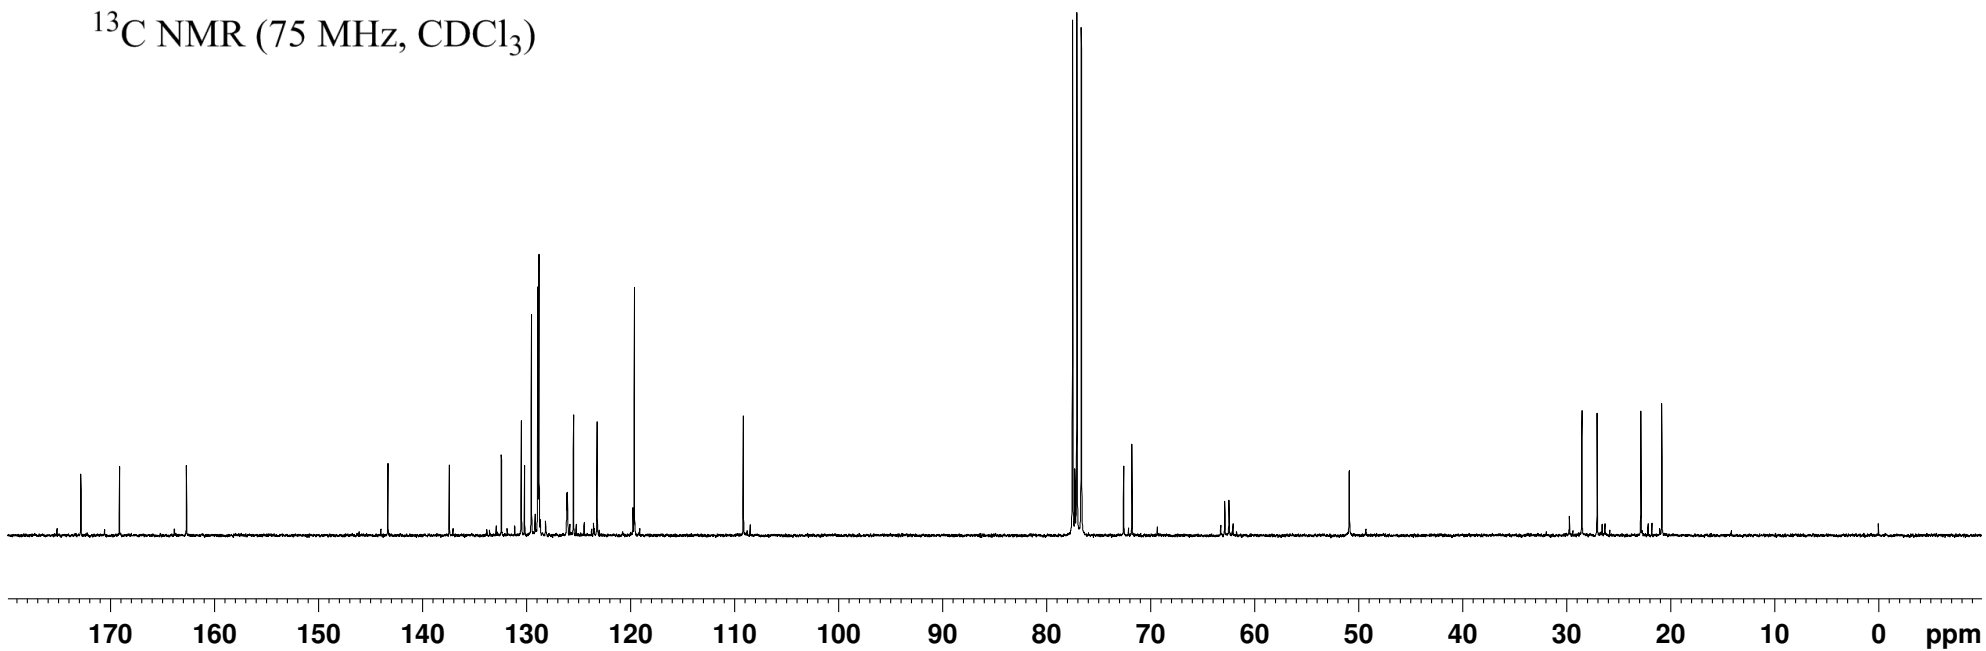



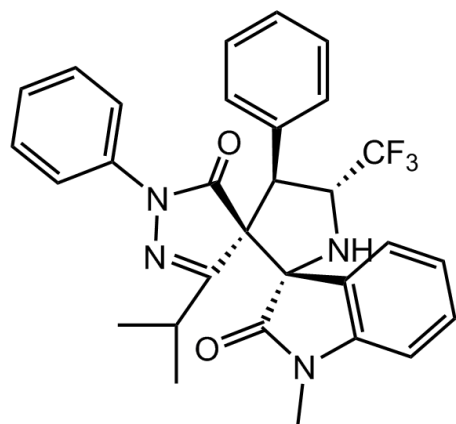

**3wa**

<sup>19</sup>F NMR (282 MHz, CDCl<sub>3</sub>)

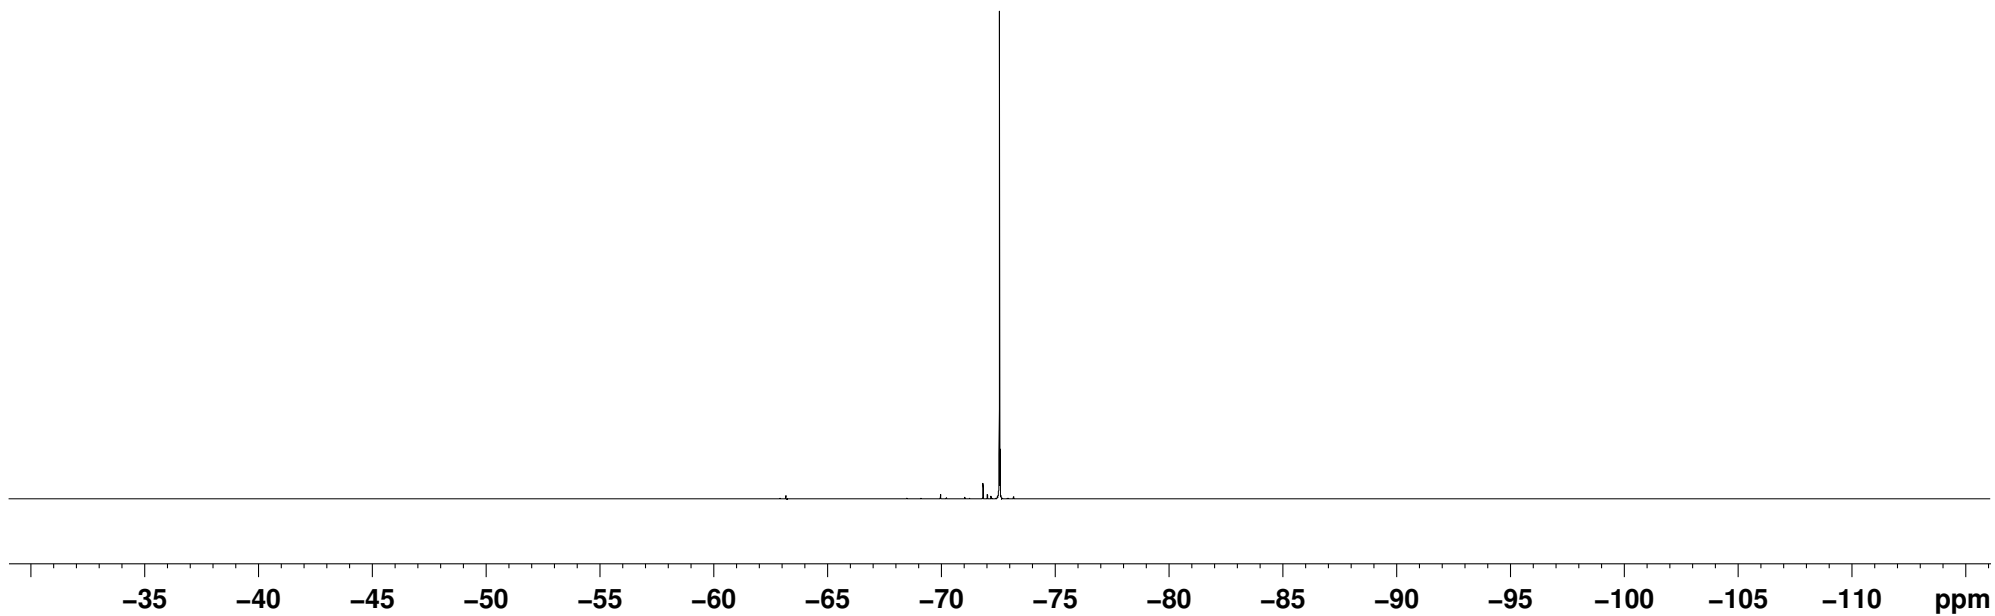

7.851  
7.826  
7.643  
7.618  
7.491  
7.465  
7.430  
7.404  
7.378  
7.363  
7.349  
7.332  
7.305  
7.279  
7.263  
7.245  
7.231  
7.223  
7.214  
7.192  
7.147  
7.122  
7.098  
6.833  
6.807

5.515  
5.508  
5.482  
5.457  
5.423  
5.398  
5.331

4.543  
4.507

3.978  
3.944

3.204  
3.058

2.028  
2.009  
1.984  
1.967  
1.955  
1.939  
1.931  
1.922  
1.914  
1.260  
1.122  
1.098  
1.074  
0.927  
0.913  
0.903  
0.883  
0.848  
0.832  
0.810

-0.000

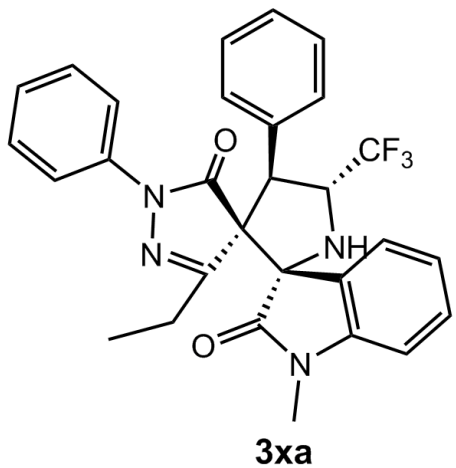

<sup>1</sup>H NMR (300 MHz, CDCl<sub>3</sub>)

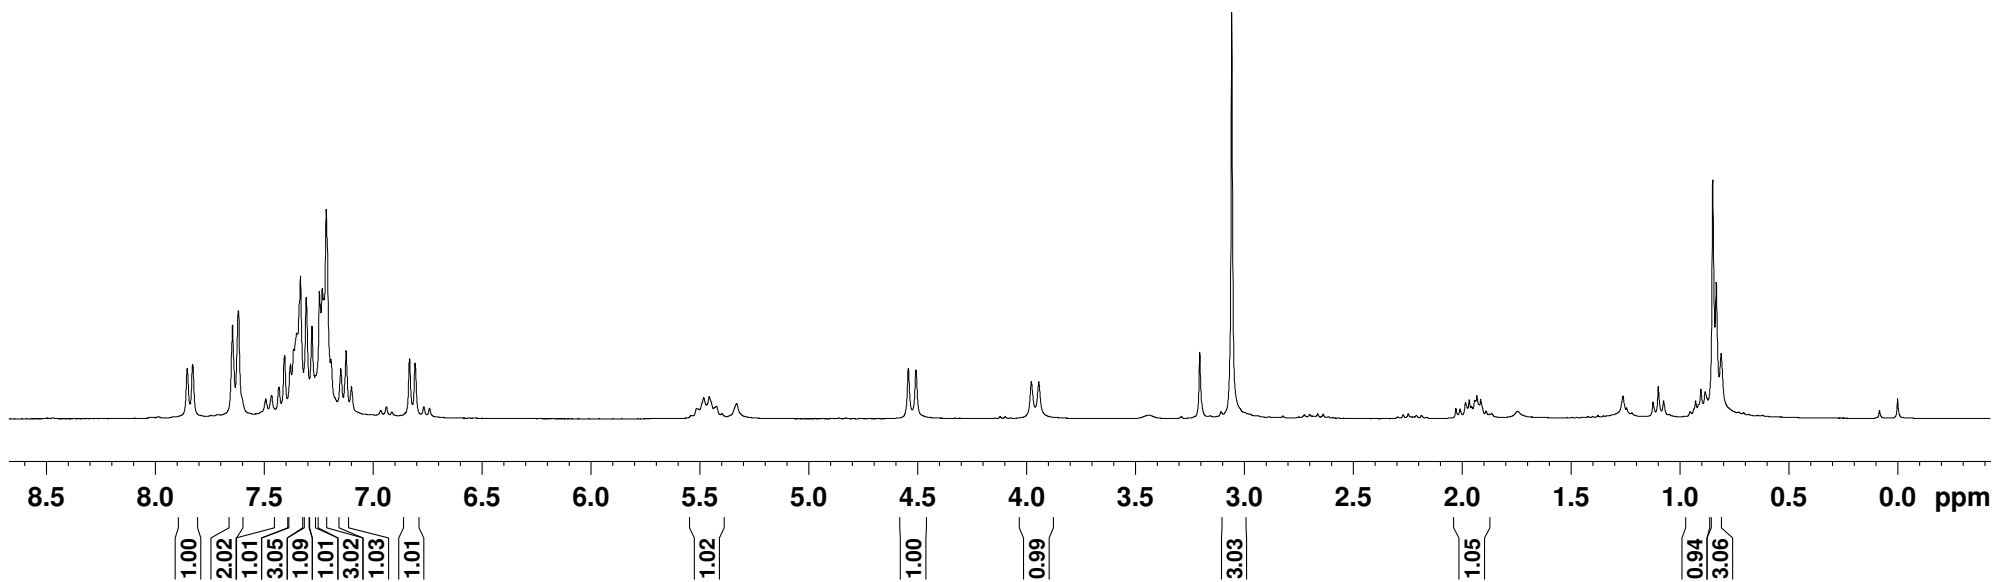

— 173.31  
 — 168.66  
 — 158.17  
 — 142.77  
 — 137.28  
 — 131.60  
 — 130.53  
 — 130.40  
 — 128.86  
 — 128.75  
 — 128.69  
 — 128.61  
 — 125.76  
 — 125.38  
 — 123.10  
 — 119.44  
 — 108.78

77.49  
 77.07  
 76.65  
 72.36  
 71.62  
 61.69  
 61.28  
 60.89  
 60.48  
 50.69  
 27.04  
 22.54  
 9.54

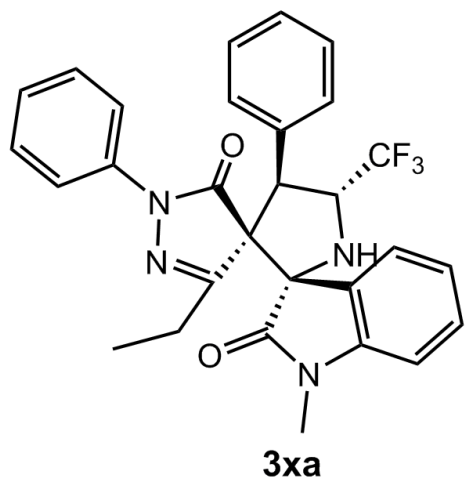

$^{13}\text{C}$  NMR (75 MHz,  $\text{CDCl}_3$ )

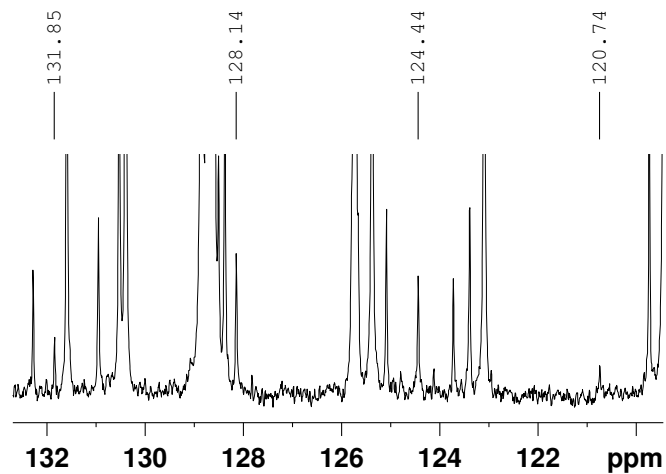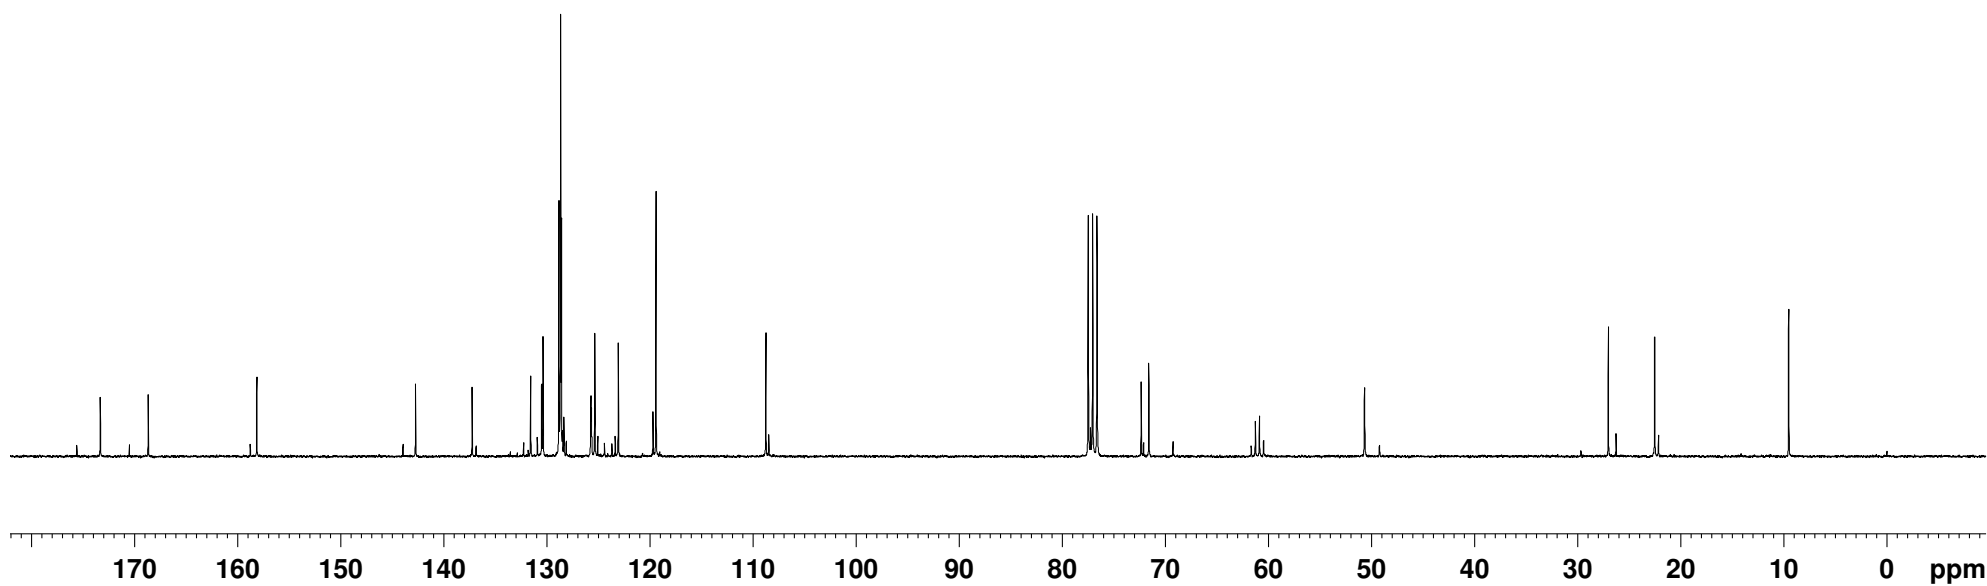

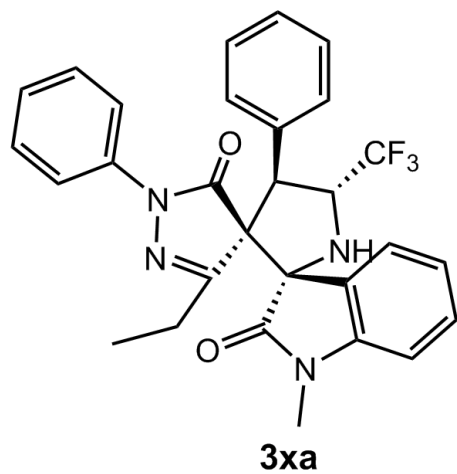

$^{19}\text{F}$  NMR (282 MHz,  $\text{CDCl}_3$ )

— -72.97

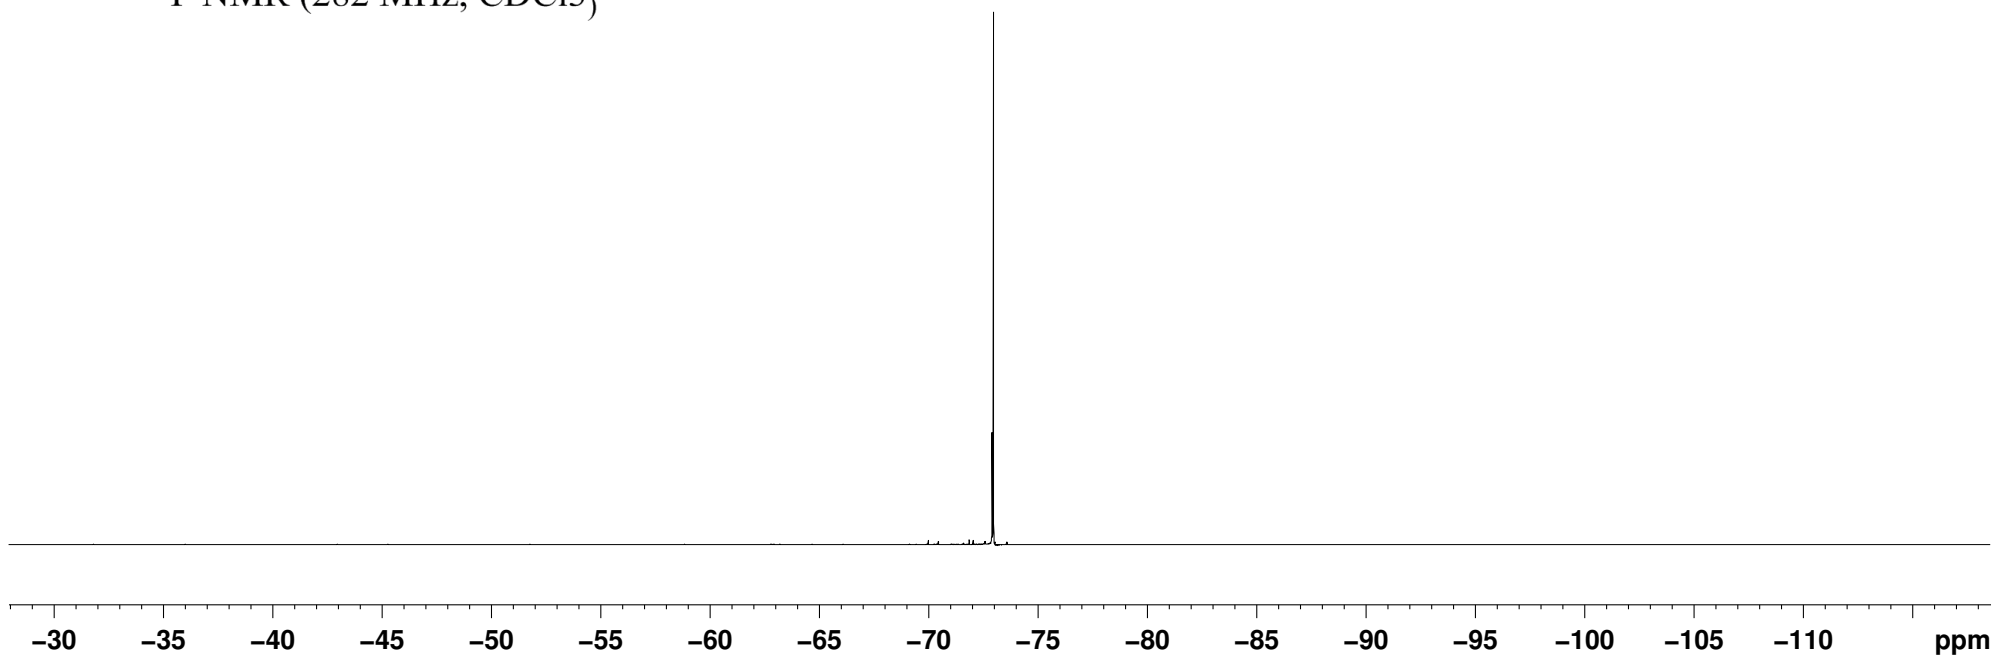

Supplement: c9ob00720b1.pdf [file c9ob00720b1.pdf]
